# Supplementary material for: Dissecting multilayer cell–cell communications with signaling feedback loops from spatial transcriptomics data
Source: HighWire-hosted journal article supplement (doi:10.1101/gr.279857.124), 2025-04-22
Supplement: Supplemental_Table_S2.xlsx [file Supplemental_Table_S2.xlsx]

## Sheet: Table S2 -README
Sheet1	Statistics of information in the constructed prior databases LigRecDB
Sheet2	Statistics of information in the constructed prior databases RecTFDB
Sheet3	Statistics of information in the constructed prior databases TFTGDB

## Sheet: Sheet1
primary.source	secondary.source	nr_edges	nr_nodes	nr_source_nodes	nr_target_nodes
NicheNet	Ramilowski_2015	1152	902	461	441
NicheNet	KEGG	449	380	217	208
NicheNet	Guide2PHARMACOLOGY	409	395	209	186
ITALK	PMID	2440	1351	692	664
connectomeDB2020	Ramilowski_2015	1751	1150	605	545
connectomeDB2020	Hou_2020	340	390	221	185
connectomeDB2020	CellphoneDB	121	141	86	85
connectomeDB2020	RNA-Magnet	50	57	36	38
connectomeDB2020	SingleCellSignalR	22	35	19	17
connectomeDB2020	ICELLNET	9	15	6	9
CellChat	KEGG	1413	648	369	311
CellChat	PMID	508	370	194	187

## Sheet: Sheet2
primary.source	secondary.source	nr_edges	nr_nodes	nr_source_nodes	nr_target_nodes	nr_pws	nr_Ligands	nr_Receptors	nr_TFs
graphite	BioCarta	13988	1035	873	885	247	147	117	236
graphite	KEGG	148830	6139	5070	5167	306	659	611	580
graphite	NCI	30373	2388	1696	2208	212	337	279	454
graphite	PANTHER	31280	1165	957	1000	83	220	243	160
graphite	PathBank	462572	1305	1098	1133	48590	77	76	68
graphite	PharmGKB	4041	553	414	433	60	40	73	69
graphite	Reactome	3054658	10024	8471	8660	1901	784	726	986
graphite	SMPDB	462224	1275	1073	1108	48578	77	73	67

## Sheet: Sheet3
primary.source	secondary.source	nr_edges	nr_nodes	nr_source_nodes	nr_target_nodes
TRRUST	PMID	8427	2862	795	2492
RegNetwork	Annodb	122975	19835	155	19826
RegNetwork	PPI	15826	4081	1367	3911
RegNetwork	Regdb	13020	4009	140	3965
RegNetwork	KEGG	2605	812	225	765
HTRIdb	PMID	18160	11957	283	11886
GTRD	meta analysis	635713	11993	574	11569
