# Supplementary material for: Dissecting multilayer cell–cell communications with signaling feedback loops from spatial transcriptomics data
Source: HighWire-hosted journal article supplement (doi:10.1101/gr.279857.124), 2025-04-22
Supplement: Supplemental_Table_S3.xlsx [file Supplemental_Table_S3.xlsx]

## Sheet: Table S3
Supplemental Table S3. The detailed information of cell line datasets
ID	Accesion	Type	Treatment	cellLine	tissue	Cell type	Source
1	GSE7561	Ligand	IGF1	MCF-7	breast	Mailgant Epithelial cells	scMLnet
2	GSE65398	Ligand	IGF1	MCF-7	breast	Mailgant Epithelial cells	scMLnet
3	GSE15893	Ligand	CXCL12	MDA-MB-231	breast	Mailgant Epithelial cells	scMLnet
4	GSE54329	Ligand	IL6	ZR-751	breast	Mailgant Epithelial cells	scMLnet
5	GSE54329	Ligand	IL6	MDA-MB-415	breast	Mailgant Epithelial cells	scMLnet
6	GSE54329	Ligand	IL6	MDA-MB-175-VIIdsRed	breast	Mailgant Epithelial cells	scMLnet
7	GSE54329	Ligand	IL6	MCF-7	breast	Mailgant Epithelial cells	scMLnet
8	GSE54329	Ligand	IL6	EFM-19	breast	Mailgant Epithelial cells	scMLnet
9	GSE54329	Ligand	IL6	HCC1428	breast	Mailgant Epithelial cells	scMLnet
10	GSE54329	Ligand	IL6	BT-483	breast	Mailgant Epithelial cells	scMLnet
11	GSE54329	Ligand	IL6	BT-474	breast	Mailgant Epithelial cells	scMLnet
12	GSE54329	Ligand	IL6	MDA-MB-134VI	breast	Mailgant Epithelial cells	scMLnet
13	GSE54329	Ligand	IL6	T47D	breast	Mailgant Epithelial cells	scMLnet
14	GSE160990	Ligand	TGFB1	MDA-MB-231	breast	Mailgant Epithelial cells	scMLnet
15	GSE36051	Ligand	DDL4	MCF-7	breast	Mailgant Epithelial cells	scMLnet
16	GSE36051	Ligand	DDL4	MDA-MB-231	breast	Mailgant Epithelial cells	scMLnet
17	GSE46903	Ligand	IL4	Macrophage (Macrophage cultered in presence of GM-CSF)	lung	immune	NicheNet
18	GSE46903	Ligand	IL10	Macrophage (Macrophage cultered in presence of GM-CSF)	lung	immune	NicheNet
19	GSE46903	Ligand	TNF	Macrophage (Macrophage cultered in presence of GM-CSF)	lung	immune	NicheNet
20	GSE46903	Ligand	IFNG	Macrophage (Macrophage cultered in presence of GM-CSF)	lung	immune	NicheNet
21	GSE46903	Ligand	IFNB1	Macrophage (Macrophage cultered in presence of GM-CSF)	lung	immune	NicheNet
22	GSE46903	Ligand	IL13	Macrophage (Macrophage cultered in presence of GM-CSF)	lung	immune	NicheNet
23	GSE46903	Ligand	IL4	Macrophage (Macrophage cultered in presence of GM-CSF)	lung	immune	NicheNet
24	GSE46903	Ligand	IFNG	Macrophage (Macrophage cultered in presence of GM-CSF)	lung	immune	NicheNet
25	GSE5542	Ligand	IFNG	A549	lung	Mailgant Epithelial cells	NicheNet
26	GSE71404	Ligand	HGF	PC3M	prostate adenocarcinom	Mailgant Epithelial cells	NicheNet
27	GSE71404	Ligand	TAC1	PC3M	prostate adenocarcinom	Mailgant Epithelial cells	NicheNet
28	GSE6653	Ligand	TGFB1	IOSE (immortalized ovarian surface epithelial cells)	ovarian	epithelial cells	NicheNet
29	GSE84500	Ligand	BMP2	hMSCs (human Mesenchymal stem cells)	bone marrow	stem cell	NicheNet
30	GSE47542	Ligand	IL4	IMR-90	lung	fibroblast	NicheNet
31	GSE47542	Ligand	IL13	IMR-90	lung	fibroblast	NicheNet
32	GSE47542	Ligand	TNF	IMR-90	lung	fibroblast	NicheNet
33	GSE7216	Ligand	IL19	Epidermal keratinocytes	skin	keratinocyte	NicheNet
34	GSE7216	Ligand	IL20	Epidermal keratinocytes	skin	keratinocyte	NicheNet
35	GSE7216	Ligand	IL22	Epidermal keratinocytes	skin	keratinocyte	NicheNet
36	GSE7216	Ligand	IL24	Epidermal keratinocytes	skin	keratinocyte	NicheNet
37	GSE7216	Ligand	IL1B	Epidermal keratinocytes	skin	keratinocyte	NicheNet
38	GSE7216	Ligand	FGF7	Epidermal keratinocytes	skin	keratinocyte	NicheNet
39	GSE7216	Ligand	IFNG	Epidermal keratinocytes	skin	keratinocyte	NicheNet
40	GSE7216	Ligand	IL26	Epidermal keratinocytes	skin	keratinocyte	NicheNet
41	GSE44732	Ligand	IL27	Monocyte-derived Dendritic Cells	blood	Dendritic Cells	NicheNet
42	GSE59237	Ligand	TSLP	Blood Dendritic cells	blood	Dendritic Cells	NicheNet
43	GSE59237	Ligand	TNF	Blood Dendritic cells	blood	Dendritic Cells	NicheNet
44	GSE27467	Ligand	GNRH1	SCL60	kidney	epithelial cells	NicheNet
45	GSE28569	Ligand	TGFB1	MCF10A	breast	epithelial cells	NicheNet
46	GSE17782	Ligand	TGFB3	AD-MSC (Adipose-derived mesenchymal stem cells)	adipose	stem cell	NicheNet
47	GSE19098	Ligand	VEGFA	HUVECs (human umbilical vein endothelial cells)	blood	endothelial cells	NicheNet
48	GSE19098	Ligand	VEGFA	HUVECs (human umbilical vein endothelial cells)	blood	endothelial cells	NicheNet
49	GSE31193	Ligand	IFNL3	hepatocyte	liver	hepatocyte	NicheNet
50	GSE31193	Ligand	IFNA1	hepatocyte	liver	hepatocyte	NicheNet
51	GSE23952	Ligand	TGFB1	PANC-1 (pancreatic adenocarcinoma cell line)	pancreas	Mailgant Epithelial cells	NicheNet
52	GSE36287	Ligand	TNF	keratinocyte	skin	keratinocyte	NicheNet
53	GSE36287	Ligand	IFNG	keratinocyte	skin	keratinocyte	NicheNet
54	GSE36287	Ligand	IL4	keratinocyte	skin	keratinocyte	NicheNet
55	GSE36287	Ligand	IFNA1	keratinocyte	skin	keratinocyte	NicheNet
56	GSE36287	Ligand	IL17A	keratinocyte	skin	keratinocyte	NicheNet
57	GSE36287	Ligand	IL13	keratinocyte	skin	keratinocyte	NicheNet
58	GSE68164	Ligand	TGFB1	Prostate fibroblasts	prostate	fibroblast	NicheNet
59	GSE68164	Ligand	IL6	Prostate fibroblasts	prostate	fibroblast	NicheNet
60	GSE17708	Ligand	TGFB1	A549	lung	Mailgant Epithelial cells	NicheNet
61	GSE59184	Ligand	IL4	mononuclear cells	PBMC	immune	NicheNet
62	GSE59184	Ligand	IL10	mononuclear cells	PBMC	immune	NicheNet
63	GSE59184	Ligand	IL15	mononuclear cells	PBMC	immune	NicheNet
64	GSE43700	Ligand	IL10	mononuclear cells	PBMC	immune	NicheNet
65	GSE14256	Ligand	PDGFB	fibroblast	skin	fibroblast	NicheNet
66	GSE14256	Ligand	FGF2	fibroblast	skin	fibroblast	NicheNet
67	GSE58203	Ligand	IL1A	SFBs (synovial fibroblasts)	synovitis	fibroblast	NicheNet
68	GSE58203	Ligand	PDGFD	SFBs (synovial fibroblasts)	synovitis	fibroblast	NicheNet
69	GSE10315	Ligand	BMP2	hMSCs (human Mesenchymal stem cells)	bone marrow	stem cell	NicheNet
70	GSE10315	Ligand	TGFB3	hMSCs (human Mesenchymal stem cells)	bone marrow	stem cell	NicheNet
71	GSE29316	Ligand	SHH	Colon fibroblast	colon	fibroblast	NicheNet
72	GSE9169	Ligand	BDNF	SK-N-SH (HTB-11)	neuroblastoma	lymphoblast	NicheNet
73	GSE9169	Ligand	BDNF	SH-SY5Y-A (CRL-2266)	neuroblastoma	lymphoblast	NicheNet
74	GSE10311	Ligand	BMP2	HOb514	bone marrow	osteoblast	NicheNet
75	GSE69639	Ligand	TNF	HT-29	colon	Mailgant Epithelial cells	NicheNet
76	GSE69639	Ligand	TNF	HT-29	colon	Mailgant Epithelial cells	NicheNet
77	GSE69639	Ligand	EGF	HT-29	colon	Mailgant Epithelial cells	NicheNet
78	GSE60880	Ligand	TGFB1	HLF	lung	fibroblast	NicheNet
79	GSE60880	Ligand	EGF	HLF	lung	fibroblast	NicheNet
80	GSE60880	Ligand	IL1B	HLF	lung	fibroblast	NicheNet
81	GSE32975	Ligand	EGF	Hacat (human immortalized keratinocytes)	skin	keratinocyte	NicheNet
82	GSE32975	Ligand	TNF	Hacat (human immortalized keratinocytes)	skin	keratinocyte	NicheNet
83	GSE20854	Ligand	EGF	Ishikawa	endometrium	Mailgant Epithelial cells	NicheNet
84	GSE20854	Ligand	EGF	Hec50co	endometrium	Mailgant Epithelial cells	NicheNet
85	GSE129484	Ligand	TNF	human synovial fibroblasts	synovitis	fibroblasts	scMLnet
86	GSE129484	Ligand	IL17A	human synovial fibroblasts	synovitis	fibroblasts	scMLnet
87	GSE28580	Ligand	INS	MCF-7	breast	Mailgant Epithelial cells	scMLnet
88	GSE74146	Ligand	FGF10	MCF-7	breast	Mailgant Epithelial cells	scMLnet
89	GSE106755	Ligand	WNT3A	hFLPC(human fetal liver progenitor cells)	liver	progenitor cells	scMLnet
90	GSE106755	Ligand	WNT5A	hFLPC(human fetal liver progenitor cells)	liver	progenitor cells	scMLnet
91	GSE106755	Ligand	WNT3A	SV40LT-HFL	liver	progenitor cells	scMLnet
92	GSE106755	Ligand	WNT5A	SV40LT-HFL	liver	progenitor cells	scMLnet
93	GSE65238	Ligand	WNT3A	MDA-MB-468	breast	Mailgant Epithelial cells	scMLnet
94	GSE65238	Ligand	WNT3A	HCC38	breast	Mailgant Epithelial cells	scMLnet
95	GSE36051	Ligand	JAG1	MCF-7	breast	Mailgant Epithelial cells	scMLnet
96	GSE36051	Ligand	JAG1	MDA-MB-231	breast	Mailgant Epithelial cells	scMLnet
103	GSE39180	Ligand	JAG1	HUVECs (human umbilical vein endothelial cells)	vein	endothelial cells	stMLnet
97	GSE15893	Receptor	CXCR4	MDA-MB-231	breast	Mailgant Epithelial cells	stMLnet
98	GSE43907	Receptor	ERBB2	MCF10A	breast	Epithelial cells	stMLnet
99	GSE120268	Receptor	AXL	MDA-MB-231	breast	Mailgant Epithelial cells	stMLnet
100	GSE148322	Receptor	AR	UMUC3	bladder	Mailgant Epithelial cells	stMLnet
101	GSE127770	Receptor	NOTCH1	SJG6	OSCC	Mailgant Epithelial cells	stMLnet
102	GSE85986	Receptor	NOTCH1	HUVECs (human umbilical vein endothelial cells)	vein	endothelial cells	stMLnet
104	GSE20914	Receptor	CD44	HCT116	colon	Mailgant Epithelial cells	stMLnet
105	GSE59343	Receptor	IGFR1	Mel624	skin	Mailgant Epithelial cells	stMLnet
106	GSE86547	Receptor	AR	CWR22Rv1	prostate	Mailgant Epithelial cells	stMLnet
107	GSE66361	Receptor	EPHB2	SCC12A	skin	Mailgant Epithelial cells	stMLnet
108	GSE66361	Receptor	EPHB2	SCC59A	skin	Mailgant Epithelial cells	stMLnet
109	GSE66361	Receptor	EPHB2	SCC115	skin	Mailgant Epithelial cells	stMLnet
110	GSE153702	Receptor	ITGAV	BxPC3	pancreas	Mailgant Epithelial cells	stMLnet
111	GSE153702	Receptor	ITGAV	PaCa 5061	pancreas	Mailgant Epithelial cells	stMLnet
112	GSE140145	Receptor	ALK	S24	glioblastoma	glioblastoma cells	stMLnet
113	GSE138127	Receptor	FGFR1	Z-138 (Mantle cell lymphoma cell line)	Mantle cell lymphoma	immune	stMLnet
114	GSE116414	Receptor	FGFR1	GSLC (glioblastoma stem-like cells)	glioblastoma	stem cells	stMLnet
115	GSE69747	Receptor	ITGB4	H1650	lung	Mailgant Epithelial cells	stMLnet
116	GSE69747	Receptor	EGFR	H1650	lung	Mailgant Epithelial cells	stMLnet
117	GSE69747	Receptor	LEPR	H1650	lung	Mailgant Epithelial cells	stMLnet
118	GSE74146	Receptor	FGFR2	MCF-7	breast	Mailgant Epithelial cells	stMLnet
119	GSE125547	Receptor	FGFR3	UMUC-14	kidney	Mailgant Epithelial cells	stMLnet
120	GSE84731	Receptor	FGFR3	MGH-U3	bladder	Mailgant Epithelial cells	stMLnet
121	GSE84732	Receptor	FGFR3	RT112	bladder	Mailgant Epithelial cells	stMLnet
122	GSE41035	Receptor	FGFR3	RT112	bladder	Mailgant Epithelial cells	stMLnet
123	GSE41035	Receptor	FGFR3	RT112	bladder	Mailgant Epithelial cells	stMLnet
124	GSE41035	Receptor	FGFR3	RT112	bladder	Mailgant Epithelial cells	stMLnet
125	GSE106932	Receptor	NRP1	Teffs	blood	immune	stMLnet
126	GSE106932	Receptor	NRP1	Tregs	blood	immune	stMLnet
127	GSE157680	Receptor	NRP1	HT-29	colon	Mailgant Epithelial cells	stMLnet
128	GSE157680	Receptor	NRP1	MDA-MB-231	breast	Mailgant Epithelial cells	stMLnet
129	GSE53199	Receptor	SDC1	HS5	marrow	stromal cells	stMLnet
