# Supplementary material for: Dissecting multilayer cell–cell communications with signaling feedback loops from spatial transcriptomics data
Source: HighWire-hosted journal article supplement (doi:10.1101/gr.279857.124), 2025-04-22
Supplement: Supplemental_Table_S4_.xlsx [file Supplemental_Table_S4_.xlsx]

## Sheet: Sheet1
Supplemental Table S4. The detailed information of all datasets used in stMLnet analysis
Specie	Tissue	Technology	Sample ID	Cell/bead/spot number	Gene number	Reference PMID	Download URL
mouse	cortex	seqFISH+	——	523	10000	30911168	URL
mouse	hypothalamus preoptic	MERFISH	Section 6	4964	161	30385464	URL
mouse	hypothalamus preoptic	MERFISH	Section 7	4774	161	30385464	URL
mouse	hypothalamus preoptic	MERFISH	Section 8	4490	161	30385464	URL
mouse	hypothalamus preoptic	MERFISH	Section 9	4858	161	30385464	URL
mouse	hippocampus	Slide-seq v2	——	13854	19375	33288904	URL
mouse	embryo	Stereo-seq	E16.5 (E1S3)	155741	26387	35512705	URL
human	breast cancer	10X Visium	CID4465	1211	17365	34493872	URL
human	breast cancer	10X Visium	——	3798	36601	——	URL
human	glioma	10X Visium	UKF304_T_ST	3098	15058	35700707	URL
human	lung	10X Visium	——	3008	10893	36776149	URL
mouse	breast cancer	10X Genomics	CID4465	1564	29733	34493872	URL
mouse	breast cancer	10x Genomics	——	1112	16837	30181541	URL
mouse	Glioma	10x Genomics	——	3589	19909	29091775	URL
mouse	Glioma	10x Genomics	——	32	23337	27199435	URL
human	lung	10x Genomics	——	26485	65662	33208946	URL
