# Supplementary material for: Dissecting multilayer cell–cell communications with signaling feedback loops from spatial transcriptomics data
Source: HighWire-hosted journal article supplement (doi:10.1101/gr.279857.124), 2025-04-22
Supplement: Supplemental_Table_S5.xlsx [file Supplemental_Table_S5.xlsx]

## Sheet: Table S5
Supplemental Table S5. Cell line perturbation-expression datasets used in benchmarking
Dataset	Perturbed Ligand/Receptor	Type	Condition	Cell Line	Disease
GSE120268	AXL	receptor	Knockdown	MDA-MB-231	Breast cancer
GSE157680	NRP1	receptor	Knockdown	MDA-MB-231	Breast cancer
GSE15893	CXCR4	receptor	Mutant	MDA-MB-231	Breast cancer
GSE15893	CXCL12	ligand	Treatment	MDA-MB-231	Breast cancer
GSE160990	TGFB1	ligand	Treatment	MDA-MB-231	Breast cancer
GSE36051	DLL4(1)	ligand	Treatment	MCF7	Breast cancer
GSE36051	DLL4(2)	ligand	Treatment	MDA-MB-231	Breast cancer
GSE36051	JAG1	ligand	Treatment	MDA-MB-231	Breast cancer
GSE65398	IGF1(1)	ligand	Treatment	MCF7	Breast cancer
GSE7561	IGF1(2)	ligand	Treatment	MCF7	Breast cancer
GSE54329	IL6(1)	ligand	Treatment	EFM-19	Breast cancer
GSE54329	IL6(1)	ligand	Treatment	HCC1428	Breast cancer
GSE54329	IL6(1)	ligand	Treatment	MDA-MB-134VI	Breast cancer
GSE54329	IL6(1)	ligand	Treatment	MDA-MB-175-VIIdsRed	Breast cancer
GSE69104	CSF1R	receptor	Inhibit	macrophages	Gliomas
