# Supplementary material for: Dissecting multilayer cell–cell communications with signaling feedback loops from spatial transcriptomics data
Source: HighWire-hosted journal article supplement (doi:10.1101/gr.279857.124), 2025-04-22
Supplement: Supplemental_Table_S6.xlsx [file Supplemental_Table_S6.xlsx]

## Sheet: Table S6 - README
Sheet1	The expression matrix of 100 groups of data in simulation dataset 1-group 1
Sheet2	The expression matrix of 100 groups of data in simulation dataset 1-group 2
Sheet3	The expression matrix of 100 groups of data in simulation dataset 1-group 3
Sheet4	The expression matrix of 100 groups of data in simulation dataset 1-group 4
Sheet5	The expression matrix of 100 groups of data in simulation dataset 1-group 5
Sheet6	The expression matrix of 100 groups of data in simulation dataset 1-group 6
Sheet7	The expression matrix of 100 groups of data in simulation dataset 1-group 7
Sheet8	The expression matrix of 100 groups of data in simulation dataset 1-group 8
Sheet9	The expression matrix of 100 groups of data in simulation dataset 1-group 9
Sheet10	The expression matrix of 100 groups of data in simulation dataset 1-group 10
Sheet11	The expression matrix of 100 groups of data in simulation dataset 1-group 11
Sheet12	The expression matrix of 100 groups of data in simulation dataset 1-group 12
Sheet13	The expression matrix of 100 groups of data in simulation dataset 1-group 13
Sheet14	The expression matrix of 100 groups of data in simulation dataset 1-group 14
Sheet15	The expression matrix of 100 groups of data in simulation dataset 1-group 15
Sheet16	The expression matrix of 100 groups of data in simulation dataset 1-group 16
Sheet17	The expression matrix of 100 groups of data in simulation dataset 1-group 17
Sheet18	The expression matrix of 100 groups of data in simulation dataset 1-group 18
Sheet19	The expression matrix of 100 groups of data in simulation dataset 1-group 19
Sheet20	The expression matrix of 100 groups of data in simulation dataset 1-group 20
Sheet21	The expression matrix of 100 groups of data in simulation dataset 1-group 21
Sheet22	The expression matrix of 100 groups of data in simulation dataset 1-group 22
Sheet23	The expression matrix of 100 groups of data in simulation dataset 1-group 23
Sheet24	The expression matrix of 100 groups of data in simulation dataset 1-group 24
Sheet25	The expression matrix of 100 groups of data in simulation dataset 1-group 25
Sheet26	The expression matrix of 100 groups of data in simulation dataset 1-group 26
Sheet27	The expression matrix of 100 groups of data in simulation dataset 1-group 27
Sheet28	The expression matrix of 100 groups of data in simulation dataset 1-group 28
Sheet29	The expression matrix of 100 groups of data in simulation dataset 1-group 29
Sheet30	The expression matrix of 100 groups of data in simulation dataset 1-group 30
Sheet31	The expression matrix of 100 groups of data in simulation dataset 1-group 31
Sheet32	The expression matrix of 100 groups of data in simulation dataset 1-group 32
Sheet33	The expression matrix of 100 groups of data in simulation dataset 1-group 33
Sheet34	The expression matrix of 100 groups of data in simulation dataset 1-group 34
Sheet35	The expression matrix of 100 groups of data in simulation dataset 1-group 35
Sheet36	The expression matrix of 100 groups of data in simulation dataset 1-group 36
Sheet37	The expression matrix of 100 groups of data in simulation dataset 1-group 37
Sheet38	The expression matrix of 100 groups of data in simulation dataset 1-group 38
Sheet39	The expression matrix of 100 groups of data in simulation dataset 1-group 39
Sheet40	The expression matrix of 100 groups of data in simulation dataset 1-group 40
Sheet41	The expression matrix of 100 groups of data in simulation dataset 1-group 41
Sheet42	The expression matrix of 100 groups of data in simulation dataset 1-group 42
Sheet43	The expression matrix of 100 groups of data in simulation dataset 1-group 43
Sheet44	The expression matrix of 100 groups of data in simulation dataset 1-group 44
Sheet45	The expression matrix of 100 groups of data in simulation dataset 1-group 45
Sheet46	The expression matrix of 100 groups of data in simulation dataset 1-group 46
Sheet47	The expression matrix of 100 groups of data in simulation dataset 1-group 47
Sheet48	The expression matrix of 100 groups of data in simulation dataset 1-group 48
Sheet49	The expression matrix of 100 groups of data in simulation dataset 1-group 49
Sheet50	The expression matrix of 100 groups of data in simulation dataset 1-group 50
Sheet51	The expression matrix of 100 groups of data in simulation dataset 1-group 51
Sheet52	The expression matrix of 100 groups of data in simulation dataset 1-group 52
Sheet53	The expression matrix of 100 groups of data in simulation dataset 1-group 53
Sheet54	The expression matrix of 100 groups of data in simulation dataset 1-group 54
Sheet55	The expression matrix of 100 groups of data in simulation dataset 1-group 55
Sheet56	The expression matrix of 100 groups of data in simulation dataset 1-group 56
Sheet57	The expression matrix of 100 groups of data in simulation dataset 1-group 57
Sheet58	The expression matrix of 100 groups of data in simulation dataset 1-group 58
Sheet59	The expression matrix of 100 groups of data in simulation dataset 1-group 59
Sheet60	The expression matrix of 100 groups of data in simulation dataset 1-group 60
Sheet61	The expression matrix of 100 groups of data in simulation dataset 1-group 61
Sheet62	The expression matrix of 100 groups of data in simulation dataset 1-group 62
Sheet63	The expression matrix of 100 groups of data in simulation dataset 1-group 63
Sheet64	The expression matrix of 100 groups of data in simulation dataset 1-group 64
Sheet65	The expression matrix of 100 groups of data in simulation dataset 1-group 65
Sheet66	The expression matrix of 100 groups of data in simulation dataset 1-group 66
Sheet67	The expression matrix of 100 groups of data in simulation dataset 1-group 67
Sheet68	The expression matrix of 100 groups of data in simulation dataset 1-group 68
Sheet69	The expression matrix of 100 groups of data in simulation dataset 1-group 69
Sheet70	The expression matrix of 100 groups of data in simulation dataset 1-group 70
Sheet71	The expression matrix of 100 groups of data in simulation dataset 1-group 71
Sheet72	The expression matrix of 100 groups of data in simulation dataset 1-group 72
Sheet73	The expression matrix of 100 groups of data in simulation dataset 1-group 73
Sheet74	The expression matrix of 100 groups of data in simulation dataset 1-group 74
Sheet75	The expression matrix of 100 groups of data in simulation dataset 1-group 75
Sheet76	The expression matrix of 100 groups of data in simulation dataset 1-group 76
Sheet77	The expression matrix of 100 groups of data in simulation dataset 1-group 77
Sheet78	The expression matrix of 100 groups of data in simulation dataset 1-group 78
Sheet79	The expression matrix of 100 groups of data in simulation dataset 1-group 79
Sheet80	The expression matrix of 100 groups of data in simulation dataset 1-group 80
Sheet81	The expression matrix of 100 groups of data in simulation dataset 1-group 81
Sheet82	The expression matrix of 100 groups of data in simulation dataset 1-group 82
Sheet83	The expression matrix of 100 groups of data in simulation dataset 1-group 83
Sheet84	The expression matrix of 100 groups of data in simulation dataset 1-group 84
Sheet85	The expression matrix of 100 groups of data in simulation dataset 1-group 85
Sheet86	The expression matrix of 100 groups of data in simulation dataset 1-group 86
Sheet87	The expression matrix of 100 groups of data in simulation dataset 1-group 87
Sheet88	The expression matrix of 100 groups of data in simulation dataset 1-group 88
Sheet89	The expression matrix of 100 groups of data in simulation dataset 1-group 89
Sheet90	The expression matrix of 100 groups of data in simulation dataset 1-group 90
Sheet91	The expression matrix of 100 groups of data in simulation dataset 1-group 91
Sheet92	The expression matrix of 100 groups of data in simulation dataset 1-group 92
Sheet93	The expression matrix of 100 groups of data in simulation dataset 1-group 93
Sheet94	The expression matrix of 100 groups of data in simulation dataset 1-group 94
Sheet95	The expression matrix of 100 groups of data in simulation dataset 1-group 95
Sheet96	The expression matrix of 100 groups of data in simulation dataset 1-group 96
Sheet97	The expression matrix of 100 groups of data in simulation dataset 1-group 97
Sheet98	The expression matrix of 100 groups of data in simulation dataset 1-group 98
Sheet99	The expression matrix of 100 groups of data in simulation dataset 1-group 99
Sheet100	The expression matrix of 100 groups of data in simulation dataset 1-group 100

## Sheet: Sheet1
1	1	1	1	1	1	1	1	1	1	1	1	1	1	1	1	1	1	1	1	1	1	1	1	1	1	1	1	1	1	1	1	1	1	1	1	1	1	1	1	1	1	1	1	1	1	1	1	1	1
0.0161887	0.391547	0.0721795	0.138787	1.63312	1.62692	1.49222	1.63447	1.63312	1.53094	1.62692	1.63063	1.65905	1.95329	2.01174	1.53375	1.57936	1.88159	1.59044	1.58321	1.78187	1.58856	1.63505	1.71547	1.58637	1.82783	1.70447	1.84713	1.57332	1.61374	1.60922	1.71109	1.94598	1.72879	0.185129	1.53337	1.69947	1.59573	1.65937	1.85659	1.9995	1.81605	1.55909	1.73878	1.68273	1.96814	1.52913	1.63838	2.22468	2.00751
0.0332655	0.274019	0.11778	0.184804	0.81748	0.728097	0.622285	0.719484	0.81748	0.677074	0.728097	0.73701	0.829967	0.902804	0.948222	0.675329	0.687224	0.954539	0.705477	0.733896	0.877246	0.733873	0.761379	0.804388	0.747174	0.928191	0.780964	0.919011	0.735416	0.773556	0.719328	0.786327	0.935465	0.842443	0.250331	0.686535	0.834974	0.750569	0.82834	0.939065	0.953726	0.872443	0.715498	0.833814	0.782624	0.9369	0.681073	0.792508	1.06969	0.908025
0.0506997	0.261946	0.202144	0.303128	0.702507	0.487485	0.37884	0.410475	0.702507	0.439257	0.487485	0.505278	0.735357	0.573941	0.617002	0.41754	0.394243	0.74345	0.414901	0.552288	0.661931	0.496894	0.479229	0.513961	0.590957	0.752537	0.526025	0.685088	0.544167	0.601493	0.431468	0.519736	0.600694	0.618774	0.475352	0.485918	0.631467	0.588732	0.725267	0.702984	0.642553	0.568985	0.50846	0.573129	0.507985	0.647614	0.47237	0.61359	0.710735	0.549428
0.00830998	0.182289	0.166737	0.418429	0.954755	0.571189	0.436256	0.454105	0.954755	0.458831	0.571189	0.580857	1.18011	0.576657	0.615306	0.45184	0.439905	0.955554	0.444242	0.802472	0.674375	0.54687	0.470251	0.508875	0.865352	1.0174	0.562752	0.717743	0.567986	0.830525	0.452815	0.536191	0.581467	0.742225	0.919153	0.541906	0.84763	0.882068	1.18126	0.868676	0.652167	0.54394	0.59911	0.616212	0.513646	0.660014	0.513073	0.843936	0.726483	0.578099
0.0677503	0.355014	0.32746	0.506123	0.983016	0.586384	0.428569	0.417005	0.983016	0.500073	0.586384	0.616304	1.07054	0.635288	0.694651	0.455326	0.403584	0.971648	0.42748	0.729502	0.835368	0.58145	0.51361	0.563481	0.805085	1.01603	0.622054	0.856435	0.683677	0.797009	0.453979	0.59938	0.660392	0.775951	0.870711	0.607255	0.813157	0.801524	1.0506	0.884563	0.744098	0.631113	0.630985	0.67695	0.570889	0.768846	0.580132	0.810174	0.817202	0.589005
0	0	0	0	0	0	0	0	0	0	0	0	0	0	0	0	0	0	0	0	0	0	0	0	0	0	0	0	0	0	0	0	0	0	0	0	0	0	0	0	0	0	0	0	0	0	0	0	0	0
0	0	0	0	0	0	0	0	0	0	0	0	0	0	0	0	0	0	0	0	0	0	0	0	0	0	0	0	0	0	0	0	0	0	0	0	0	0	0	0	0	0	0	0	0	0	0	0	0	0
0	0	0	0	0	0	0	0	0	0	0	0	0	0	0	0	0	0	0	0	0	0	0	0	0	0	0	0	0	0	0	0	0	0	0	0	0	0	0	0	0	0	0	0	0	0	0	0	0	0
0	0	0	0	0	0	0	0	0	0	0	0	0	0	0	0	0	0	0	0	0	0	0	0	0	0	0	0	0	0	0	0	0	0	0	0	0	0	0	0	0	0	0	0	0	0	0	0	0	0
0	0	0	0	0	0	0	0	0	0	0	0	0	0	0	0	0	0	0	0	0	0	0	0	0	0	0	0	0	0	0	0	0	0	0	0	0	0	0	0	0	0	0	0	0	0	0	0	0	0
0	0	0	0	0	0	0	0	0	0	0	0	0	0	0	0	0	0	0	0	0	0	0	0	0	0	0	0	0	0	0	0	0	0	0	0	0	0	0	0	0	0	0	0	0	0	0	0	0	0
0	0	0	0	0	0	0	0	0	0	0	0	0	0	0	0	0	0	0	0	0	0	0	0	0	0	0	0	0	0	0	0	0	0	0	0	0	0	0	0	0	0	0	0	0	0	0	0	0	0
0	0	0	0	0	0	0	0	0	0	0	0	0	0	0	0	0	0	0	0	0	0	0	0	0	0	0	0	0	0	0	0	0	0	0	0	0	0	0	0	0	0	0	0	0	0	0	0	0	0
0	0	0	0	0	0	0	0	0	0	0	0	0	0	0	0	0	0	0	0	0	0	0	0	0	0	0	0	0	0	0	0	0	0	0	0	0	0	0	0	0	0	0	0	0	0	0	0	0	0
[truncated: 1,434 more columns]

## Sheet: Sheet2
1	1	1	1	1	1	1	1	1	1	1	1	1	1	1	1	1	1	1	1	1	1	1	1	1	1	1	1	1	1	1	1	1	1	1	1	1	1	1	1	1	1	1	1	1	1	1	1	1	1
0.0381863	0.441092	0.0483694	0.14386	1.07294	1.12164	1.20522	1.11739	1.0894	1.32463	1.16974	1.3064	1.52718	1.47543	1.14702	1.23546	1.69637	1.47007	1.12982	0.996562	1.04522	1.05745	1.03902	1.05044	1.15446	1.04583	1.28752	1.11151	1.13002	1.09432	1.09828	1.11311	1.59062	1.06964	1.33546	1.39424	1.06134	1.05106	1.22791	1.03863	1.40038	1.28785	1.01521	1.0404	1.3478	1.07788	1.14464	1.11617	1.24373	1.02996
0.0904139	0.617822	0.126802	0.246222	0.880914	0.987622	1.09683	0.995221	0.929405	1.1765	1.02276	1.22007	1.41655	1.36196	0.975913	1.12995	1.54551	1.3123	0.997129	0.783462	0.868042	0.901097	0.865851	0.89533	1.04492	0.879395	1.09018	0.948509	0.983639	0.937693	0.933442	0.950303	1.42754	0.900591	1.14948	1.23979	0.910836	0.880791	1.09344	0.856457	1.20563	1.0979	0.821226	0.866777	1.23635	0.889518	0.985721	0.969373	1.08877	0.847374
0.0986795	0.512065	0.172523	0.214449	0.537142	0.56365	0.717151	0.665916	0.60044	0.805105	0.631219	0.778161	0.851955	0.832503	0.585081	0.691611	1.00882	0.769923	0.561996	0.40069	0.473907	0.528889	0.500841	0.520951	0.680504	0.504335	0.731917	0.546923	0.604084	0.523706	0.589523	0.620004	0.962954	0.510062	0.625588	0.757455	0.577417	0.536245	0.721971	0.495401	0.654752	0.610389	0.441124	0.504771	0.814697	0.466871	0.54864	0.590672	0.639397	0.456845
0.0632159	0.634945	0.158063	0.167661	1.17778	0.923331	1.35884	1.27407	1.215	2.11705	1.26087	1.40424	1.39073	1.39622	1.20805	1.17647	2.47747	1.48517	0.921727	0.792585	0.859868	0.951198	0.909157	0.896858	1.2947	0.905384	2.08175	0.955573	1.08255	0.884403	1.21628	1.3433	2.41878	0.974898	1.08989	1.48278	1.04619	1.02712	1.54453	0.960452	1.16183	1.08479	0.828612	0.910409	1.48098	0.859387	0.987298	1.17638	1.26253	0.82834
0.083235	0.412566	0.188221	0.149233	0.380208	0.267907	0.505437	0.505092	0.443506	0.660459	0.411643	0.505807	0.479085	0.492048	0.369335	0.40691	0.756376	0.438565	0.252897	0.164292	0.221863	0.296167	0.28285	0.278833	0.473204	0.270433	0.625122	0.299729	0.38583	0.239514	0.421345	0.477486	0.776287	0.271099	0.280031	0.479351	0.403073	0.349826	0.545362	0.287429	0.297486	0.297088	0.205911	0.293868	0.588166	0.188866	0.262766	0.3696	0.370648	0.203137
0	0	0	0	0	0	0	0	0	0	0	0	0	0	0	0	0	0	0	0	0	0	0	0	0	0	0	0	0	0	0	0	0	0	0	0	0	0	0	0	0	0	0	0	0	0	0	0	0	0
0	0	0	0	0	0	0	0	0	0	0	0	0	0	0	0	0	0	0	0	0	0	0	0	0	0	0	0	0	0	0	0	0	0	0	0	0	0	0	0	0	0	0	0	0	0	0	0	0	0
0	0	0	0	0	0	0	0	0	0	0	0	0	0	0	0	0	0	0	0	0	0	0	0	0	0	0	0	0	0	0	0	0	0	0	0	0	0	0	0	0	0	0	0	0	0	0	0	0	0
0	0	0	0	0	0	0	0	0	0	0	0	0	0	0	0	0	0	0	0	0	0	0	0	0	0	0	0	0	0	0	0	0	0	0	0	0	0	0	0	0	0	0	0	0	0	0	0	0	0
0	0	0	0	0	0	0	0	0	0	0	0	0	0	0	0	0	0	0	0	0	0	0	0	0	0	0	0	0	0	0	0	0	0	0	0	0	0	0	0	0	0	0	0	0	0	0	0	0	0
0	0	0	0	0	0	0	0	0	0	0	0	0	0	0	0	0	0	0	0	0	0	0	0	0	0	0	0	0	0	0	0	0	0	0	0	0	0	0	0	0	0	0	0	0	0	0	0	0	0
0	0	0	0	0	0	0	0	0	0	0	0	0	0	0	0	0	0	0	0	0	0	0	0	0	0	0	0	0	0	0	0	0	0	0	0	0	0	0	0	0	0	0	0	0	0	0	0	0	0
0	0	0	0	0	0	0	0	0	0	0	0	0	0	0	0	0	0	0	0	0	0	0	0	0	0	0	0	0	0	0	0	0	0	0	0	0	0	0	0	0	0	0	0	0	0	0	0	0	0
0	0	0	0	0	0	0	0	0	0	0	0	0	0	0	0	0	0	0	0	0	0	0	0	0	0	0	0	0	0	0	0	0	0	0	0	0	0	0	0	0	0	0	0	0	0	0	0	0	0
[truncated: 1,441 more columns]

## Sheet: Sheet3
1	1	1	1	1	1	1	1	1	1	1	1	1	1	1	1	1	1	1	1	1	1	1	1	1	1	1	1	1	1	1	1	1	1	1	1	1	1	1	1	1	1	1	1	1	1	1	1	1	1
0.983023	0.0669026	0.0215965	1.23718	1.45763	1.9109	1.46609	1.34674	1.27033	2.01296	1.53464	1.64612	1.69176	2.00199	1.66595	1.40629	1.51808	1.69072	1.29414	1.30486	1.52082	1.46127	1.76678	1.67515	1.41841	1.29973	1.30026	1.31895	1.53755	1.45792	1.38819	1.65969	1.39277	1.52266	1.27748	1.39654	1.31544	1.5567	1.55448	1.53595	1.65322	1.3514	1.25984	1.37285	1.48496	1.67493	1.30052	1.32725	1.38864	1.24664
1.06124	0.150823	0.0586696	0.893893	1.21085	1.52093	1.25131	1.09993	0.967642	1.69678	1.32561	1.43612	1.36145	1.86601	1.5039	1.14774	1.22081	1.36581	0.990055	1.02742	1.30733	1.18828	1.46271	1.36102	1.17324	1.00829	1.01041	1.05604	1.28317	1.24412	1.11381	1.39536	1.11101	1.23954	0.960071	1.14776	1.04691	1.3095	1.28583	1.2548	1.33821	1.06456	0.940392	1.1148	1.21183	1.35939	1.03392	1.06483	1.13149	0.910508
0.846316	0.172474	0.0713827	0.468972	0.750284	0.862914	0.778454	0.684078	0.544665	1.15903	0.809231	0.898099	0.794544	1.50307	1.06451	0.711164	0.701022	0.838232	0.576816	0.586108	0.834051	0.722799	0.831222	0.773773	0.809795	0.581933	0.580415	0.671597	0.731594	0.842398	0.667727	0.820243	0.630275	0.698996	0.53426	0.768117	0.630129	0.842788	0.751009	0.723425	0.81024	0.664856	0.545184	0.690498	0.732943	0.821451	0.65651	0.679878	0.717355	0.48977
1.54773	0.0669571	0.0189307	0.891597	1.27172	1.41539	1.18865	1.10302	0.928292	2.36148	1.22232	1.41607	1.27807	2.87305	1.60327	1.08927	1.12476	1.46828	1.014	0.960628	1.34151	1.14149	1.29815	1.23627	1.41707	0.980295	0.967351	1.0759	1.11632	1.33565	1.07167	1.26796	1.02568	1.10734	0.961645	1.31192	0.984594	1.33784	1.1609	1.13465	1.33161	1.21302	0.972543	1.10412	1.13232	1.33352	1.02999	1.09763	1.16633	0.917109
0.62019	0.120291	0.046321	0.178433	0.385378	0.37493	0.383029	0.351434	0.228288	0.791308	0.37254	0.450275	0.364396	1.21704	0.68288	0.361395	0.30748	0.457121	0.285189	0.241114	0.444606	0.364409	0.331687	0.317216	0.541157	0.259944	0.254701	0.373514	0.283134	0.509779	0.326488	0.361563	0.258038	0.273975	0.235918	0.479502	0.297958	0.479579	0.327384	0.306925	0.412285	0.380308	0.273643	0.353203	0.359847	0.414741	0.363097	0.387031	0.398866	0.202412
0	0	0	0	0	0	0	0	0	0	0	0	0	0	0	0	0	0	0	0	0	0	0	0	0	0	0	0	0	0	0	0	0	0	0	0	0	0	0	0	0	0	0	0	0	0	0	0	0	0
0	0	0	0	0	0	0	0	0	0	0	0	0	0	0	0	0	0	0	0	0	0	0	0	0	0	0	0	0	0	0	0	0	0	0	0	0	0	0	0	0	0	0	0	0	0	0	0	0	0
0	0	0	0	0	0	0	0	0	0	0	0	0	0	0	0	0	0	0	0	0	0	0	0	0	0	0	0	0	0	0	0	0	0	0	0	0	0	0	0	0	0	0	0	0	0	0	0	0	0
0	0	0	0	0	0	0	0	0	0	0	0	0	0	0	0	0	0	0	0	0	0	0	0	0	0	0	0	0	0	0	0	0	0	0	0	0	0	0	0	0	0	0	0	0	0	0	0	0	0
0	0	0	0	0	0	0	0	0	0	0	0	0	0	0	0	0	0	0	0	0	0	0	0	0	0	0	0	0	0	0	0	0	0	0	0	0	0	0	0	0	0	0	0	0	0	0	0	0	0
0	0	0	0	0	0	0	0	0	0	0	0	0	0	0	0	0	0	0	0	0	0	0	0	0	0	0	0	0	0	0	0	0	0	0	0	0	0	0	0	0	0	0	0	0	0	0	0	0	0
0	0	0	0	0	0	0	0	0	0	0	0	0	0	0	0	0	0	0	0	0	0	0	0	0	0	0	0	0	0	0	0	0	0	0	0	0	0	0	0	0	0	0	0	0	0	0	0	0	0
0	0	0	0	0	0	0	0	0	0	0	0	0	0	0	0	0	0	0	0	0	0	0	0	0	0	0	0	0	0	0	0	0	0	0	0	0	0	0	0	0	0	0	0	0	0	0	0	0	0
0	0	0	0	0	0	0	0	0	0	0	0	0	0	0	0	0	0	0	0	0	0	0	0	0	0	0	0	0	0	0	0	0	0	0	0	0	0	0	0	0	0	0	0	0	0	0	0	0	0
[truncated: 1,449 more columns]

## Sheet: Sheet4
1	1	1	1	1	1	1	1	1	1	1	1	1	1	1	1	1	1	1	1	1	1	1	1	1	1	1	1	1	1	1	1	1	1	1	1	1	1	1	1	1	1	1	1	1	1	1	1	1	1
0.190271	1.71465	1.64078	1.89735	2.07632	1.75815	1.74535	1.86453	1.71085	2.04445	1.80996	1.83339	2.04171	1.74481	1.61515	1.73352	1.6289	1.68578	1.77718	1.82575	1.87339	1.62233	1.80623	1.64668	1.82334	1.64402	1.671	1.85964	1.71259	1.88907	1.81202	1.71202	2.1255	1.65311	1.61636	1.78686	2.20708	1.87933	1.71965	2.15931	2.07077	2.11895	2.20748	1.76226	1.75673	1.97024	2.11705	1.95787	1.80918	1.8829
0.159738	0.699938	0.612362	0.795492	0.925335	0.668009	0.657802	0.795765	0.680209	0.769674	0.722607	0.741512	0.765958	0.685723	0.580129	0.666406	0.607143	0.655236	0.6955	0.691621	0.77526	0.5878	0.719528	0.626075	0.69106	0.612684	0.634661	0.766838	0.683475	0.755416	0.72151	0.674061	0.839278	0.632831	0.580768	0.714346	0.882343	0.789809	0.698476	0.899199	0.86556	0.858004	0.942207	0.72576	0.686757	0.816891	0.855899	0.812992	0.780741	0.790483
0.182252	0.59275	0.359414	0.596167	0.851266	0.363992	0.368185	0.666795	0.456279	0.406666	0.452422	0.458052	0.400813	0.419775	0.313366	0.364634	0.394539	0.41833	0.406551	0.355501	0.713312	0.316434	0.452187	0.400961	0.364687	0.351409	0.371084	0.510665	0.442685	0.471527	0.458934	0.476032	0.453308	0.428446	0.311421	0.415767	0.487324	0.738907	0.55553	0.654348	0.49332	0.566186	0.737084	0.595495	0.38727	0.488443	0.548997	0.508944	0.781488	0.575683
0.13244	1.13226	0.974359	1.1966	1.59643	1.04186	1.03051	1.28041	1.05386	1.19884	1.1023	1.09347	1.19615	1.0414	0.950859	1.01987	0.969555	1.02924	1.04999	1.06771	1.45359	0.957898	1.08142	0.99028	1.07187	0.978169	0.988712	1.13826	1.03323	1.12891	1.0929	1.09412	1.24406	0.998433	0.950524	1.05431	1.29457	1.45058	1.10468	1.35918	1.2183	1.29626	1.45025	1.17579	1.0328	1.17814	1.27397	1.16659	1.31855	1.21089
0.138694	0.470847	0.157158	0.392528	0.731752	0.124223	0.141651	0.516041	0.253227	0.127338	0.218782	0.203288	0.121686	0.189477	0.116187	0.118313	0.218049	0.213734	0.159522	0.093436	0.645217	0.11393	0.215834	0.209827	0.109901	0.144558	0.154766	0.270182	0.222382	0.22358	0.228146	0.300314	0.131608	0.250207	0.112078	0.15542	0.153388	0.663828	0.407081	0.415618	0.160266	0.303063	0.519012	0.456353	0.135025	0.192591	0.27279	0.226035	0.725479	0.362442
0	0	0	0	0	0	0	0	0	0	0	0	0	0	0	0	0	0	0	0	0	0	0	0	0	0	0	0	0	0	0	0	0	0	0	0	0	0	0	0	0	0	0	0	0	0	0	0	0	0
0	0	0	0	0	0	0	0	0	0	0	0	0	0	0	0	0	0	0	0	0	0	0	0	0	0	0	0	0	0	0	0	0	0	0	0	0	0	0	0	0	0	0	0	0	0	0	0	0	0
0	0	0	0	0	0	0	0	0	0	0	0	0	0	0	0	0	0	0	0	0	0	0	0	0	0	0	0	0	0	0	0	0	0	0	0	0	0	0	0	0	0	0	0	0	0	0	0	0	0
0	0	0	0	0	0	0	0	0	0	0	0	0	0	0	0	0	0	0	0	0	0	0	0	0	0	0	0	0	0	0	0	0	0	0	0	0	0	0	0	0	0	0	0	0	0	0	0	0	0
0	0	0	0	0	0	0	0	0	0	0	0	0	0	0	0	0	0	0	0	0	0	0	0	0	0	0	0	0	0	0	0	0	0	0	0	0	0	0	0	0	0	0	0	0	0	0	0	0	0
0	0	0	0	0	0	0	0	0	0	0	0	0	0	0	0	0	0	0	0	0	0	0	0	0	0	0	0	0	0	0	0	0	0	0	0	0	0	0	0	0	0	0	0	0	0	0	0	0	0
0	0	0	0	0	0	0	0	0	0	0	0	0	0	0	0	0	0	0	0	0	0	0	0	0	0	0	0	0	0	0	0	0	0	0	0	0	0	0	0	0	0	0	0	0	0	0	0	0	0
0	0	0	0	0	0	0	0	0	0	0	0	0	0	0	0	0	0	0	0	0	0	0	0	0	0	0	0	0	0	0	0	0	0	0	0	0	0	0	0	0	0	0	0	0	0	0	0	0	0
0	0	0	0	0	0	0	0	0	0	0	0	0	0	0	0	0	0	0	0	0	0	0	0	0	0	0	0	0	0	0	0	0	0	0	0	0	0	0	0	0	0	0	0	0	0	0	0	0	0
[truncated: 1,515 more columns]

## Sheet: Sheet5
1	1	1	1	1	1	1	1	1	1	1	1	1	1	1	1	1	1	1	1	1	1	1	1	1	1	1	1	1	1	1	1	1	1	1	1	1	1	1	1	1	1	1	1	1	1	1	1	1	1
0.422577	0.170613	0.169623	0.0138708	1.2575	1.39687	1.39025	1.40894	1.66898	2.5792	1.39332	1.43291	1.63619	1.48556	1.37978	1.75505	2.42778	2.64204	2.92404	1.93361	1.45325	1.3325	1.31165	1.70063	1.46205	0.297475	1.28172	1.65302	1.27115	1.38786	1.35684	1.27792	1.35137	1.26915	1.28297	1.31997	1.28902	1.25701	1.32996	1.28851	1.30537	2.08895	1.89742	1.73245	1.66202	1.28009	1.83958	2.10453	1.43279	1.35401
0.452112	0.248129	0.405987	0.0733797	0.611492	0.830333	0.973948	0.849454	0.992933	1.47447	0.768255	0.73802	1.28092	0.801698	0.734069	1.04548	1.3938	1.53613	1.69535	1.03266	0.773284	0.643663	0.689052	0.859937	0.768859	0.616454	0.657777	0.813713	0.607966	0.848048	0.867022	0.609132	0.663013	0.664162	0.695273	0.722807	0.631021	0.582176	0.732089	0.712656	0.699288	1.14009	1.18683	1.10806	0.950558	0.635813	1.00683	1.14093	0.872365	0.726252
0.299467	0.172567	0.233814	0.0631583	0.349361	0.472598	0.53621	0.483412	0.600298	0.903288	0.445864	0.426939	0.676153	0.467178	0.409587	0.643145	0.856271	0.945905	1.03824	0.60981	0.451913	0.370817	0.385756	0.490937	0.448878	0.329648	0.38058	0.462082	0.344012	0.482983	0.490369	0.351459	0.378568	0.369132	0.401894	0.411503	0.360843	0.325586	0.427366	0.403577	0.410039	0.658334	0.681093	0.635154	0.555167	0.36105	0.590671	0.662486	0.487702	0.415184
0.416504	0.218467	0.644401	0.0526541	0.707783	1.035	1.35278	1.05422	1.04159	1.41385	0.872804	0.819876	2.05307	0.872139	0.881588	1.0486	1.34515	1.45942	1.61631	1.06003	0.850595	0.722956	0.834857	0.947032	0.839169	1.21385	0.750737	0.90433	0.703376	1.05793	1.11978	0.694531	0.746222	0.8241	0.802733	0.859655	0.722339	0.684707	0.822474	0.874513	0.791127	1.25057	1.41326	1.34567	1.05693	0.74068	1.07607	1.22894	1.10859	0.839512
0.248812	0.172411	0.375496	0.100686	0.14792	0.282425	0.516837	0.309758	0.309604	0.264019	0.234711	0.145153	0.704594	0.197878	0.202457	0.290274	0.270852	0.281505	0.298613	0.163904	0.199337	0.103291	0.179955	0.157827	0.18431	0.55143	0.180351	0.13293	0.116421	0.321159	0.386415	0.104956	0.116645	0.201954	0.243356	0.230165	0.128394	0.0989084	0.236047	0.245474	0.206639	0.283988	0.429497	0.446922	0.301728	0.138533	0.242976	0.268427	0.341303	0.229202
0	0	0	0	0	0	0	0	0	0	0	0	0	0	0	0	0	0	0	0	0	0	0	0	0	0	0	0	0	0	0	0	0	0	0	0	0	0	0	0	0	0	0	0	0	0	0	0	0	0
0	0	0	0	0	0	0	0	0	0	0	0	0	0	0	0	0	0	0	0	0	0	0	0	0	0	0	0	0	0	0	0	0	0	0	0	0	0	0	0	0	0	0	0	0	0	0	0	0	0
0	0	0	0	0	0	0	0	0	0	0	0	0	0	0	0	0	0	0	0	0	0	0	0	0	0	0	0	0	0	0	0	0	0	0	0	0	0	0	0	0	0	0	0	0	0	0	0	0	0
0	0	0	0	0	0	0	0	0	0	0	0	0	0	0	0	0	0	0	0	0	0	0	0	0	0	0	0	0	0	0	0	0	0	0	0	0	0	0	0	0	0	0	0	0	0	0	0	0	0
0	0	0	0	0	0	0	0	0	0	0	0	0	0	0	0	0	0	0	0	0	0	0	0	0	0	0	0	0	0	0	0	0	0	0	0	0	0	0	0	0	0	0	0	0	0	0	0	0	0
0	0	0	0	0	0	0	0	0	0	0	0	0	0	0	0	0	0	0	0	0	0	0	0	0	0	0	0	0	0	0	0	0	0	0	0	0	0	0	0	0	0	0	0	0	0	0	0	0	0
0	0	0	0	0	0	0	0	0	0	0	0	0	0	0	0	0	0	0	0	0	0	0	0	0	0	0	0	0	0	0	0	0	0	0	0	0	0	0	0	0	0	0	0	0	0	0	0	0	0
0	0	0	0	0	0	0	0	0	0	0	0	0	0	0	0	0	0	0	0	0	0	0	0	0	0	0	0	0	0	0	0	0	0	0	0	0	0	0	0	0	0	0	0	0	0	0	0	0	0
0	0	0	0	0	0	0	0	0	0	0	0	0	0	0	0	0	0	0	0	0	0	0	0	0	0	0	0	0	0	0	0	0	0	0	0	0	0	0	0	0	0	0	0	0	0	0	0	0	0
[truncated: 1,399 more columns]

## Sheet: Sheet6
1	1	1	1	1	1	1	1	1	1	1	1	1	1	1	1	1	1	1	1	1	1	1	1	1	1	1	1	1	1	1	1	1	1	1	1	1	1	1	1	1	1	1	1	1	1	1	1	1	1
0.148516	0.308937	0.636146	1.89332	1.53324	2.05793	2.25587	1.83746	1.68132	1.64749	1.69027	1.69912	1.61171	1.51556	1.72834	1.67727	1.72767	1.5699	1.60396	1.69939	1.54832	1.72762	1.6562	1.7374	1.51802	1.75951	1.5915	1.68792	1.52842	1.62657	1.75032	1.54397	1.67298	1.57355	1.65128	1.76257	1.73341	2.41128	2.12449	1.65505	1.69691	1.54939	1.58472	2.1634	1.62627	1.67047	1.6587	1.53845	1.69969	1.6283
0.224523	0.261846	0.620596	0.867416	0.690034	1.05909	1.26712	0.841886	0.799403	0.726562	0.797533	0.854117	0.777948	0.634219	0.819251	0.75557	0.764643	0.696635	0.742793	0.838836	0.684309	0.765762	0.799479	0.934561	0.632615	0.823205	0.758629	0.775394	0.664667	0.760136	0.834941	0.701666	0.763247	0.701627	0.758052	0.934985	0.773653	1.07898	0.95674	0.761498	0.843081	0.696238	0.766309	0.976721	0.730747	0.771911	0.761931	0.699061	0.844149	0.767775
0.463547	0.239169	1.12318	0.471146	0.527873	0.955437	1.33417	0.449393	0.591809	0.378117	0.560099	0.812593	0.681721	0.342499	0.513622	0.394921	0.35533	0.386501	0.516317	0.714481	0.460715	0.362281	0.652431	0.995549	0.307579	0.547693	0.627227	0.470269	0.420772	0.538922	0.633271	0.53973	0.450894	0.400236	0.42839	0.99095	0.369444	0.50549	0.473239	0.51769	0.670435	0.471993	0.722572	0.463344	0.423576	0.433848	0.520668	0.551911	0.782037	0.589611
0.412197	0.140504	1.60572	0.696808	0.690128	1.43067	2.32221	0.666338	0.821277	0.599915	0.735737	0.976937	0.981108	0.564755	0.706107	0.611114	0.610563	0.585403	0.695089	0.886882	0.623563	0.613451	0.923177	1.37379	0.542493	0.70856	0.905786	0.682532	0.607191	0.74753	0.794875	0.692221	0.660315	0.59892	0.625892	1.3907	0.614274	0.857077	0.767085	0.747581	0.98204	0.638421	0.976606	0.768769	0.614114	0.629577	0.663883	0.730989	1.05029	0.740161
0.411085	0.189343	1.00265	0.349782	0.427353	0.795337	1.13793	0.331439	0.47474	0.278124	0.442815	0.679426	0.565745	0.257428	0.394946	0.28971	0.25143	0.288618	0.408003	0.58677	0.363429	0.257993	0.533198	0.847517	0.223486	0.427907	0.514198	0.360223	0.327702	0.428396	0.509177	0.436986	0.343166	0.30155	0.320604	0.844585	0.264154	0.36089	0.34311	0.408659	0.544385	0.371434	0.605953	0.331155	0.320662	0.32384	0.409842	0.449275	0.653657	0.475198
0	0	0	0	0	0	0	0	0	0	0	0	0	0	0	0	0	0	0	0	0	0	0	0	0	0	0	0	0	0	0	0	0	0	0	0	0	0	0	0	0	0	0	0	0	0	0	0	0	0
0	0	0	0	0	0	0	0	0	0	0	0	0	0	0	0	0	0	0	0	0	0	0	0	0	0	0	0	0	0	0	0	0	0	0	0	0	0	0	0	0	0	0	0	0	0	0	0	0	0
0	0	0	0	0	0	0	0	0	0	0	0	0	0	0	0	0	0	0	0	0	0	0	0	0	0	0	0	0	0	0	0	0	0	0	0	0	0	0	0	0	0	0	0	0	0	0	0	0	0
0	0	0	0	0	0	0	0	0	0	0	0	0	0	0	0	0	0	0	0	0	0	0	0	0	0	0	0	0	0	0	0	0	0	0	0	0	0	0	0	0	0	0	0	0	0	0	0	0	0
0	0	0	0	0	0	0	0	0	0	0	0	0	0	0	0	0	0	0	0	0	0	0	0	0	0	0	0	0	0	0	0	0	0	0	0	0	0	0	0	0	0	0	0	0	0	0	0	0	0
0	0	0	0	0	0	0	0	0	0	0	0	0	0	0	0	0	0	0	0	0	0	0	0	0	0	0	0	0	0	0	0	0	0	0	0	0	0	0	0	0	0	0	0	0	0	0	0	0	0
0	0	0	0	0	0	0	0	0	0	0	0	0	0	0	0	0	0	0	0	0	0	0	0	0	0	0	0	0	0	0	0	0	0	0	0	0	0	0	0	0	0	0	0	0	0	0	0	0	0
0	0	0	0	0	0	0	0	0	0	0	0	0	0	0	0	0	0	0	0	0	0	0	0	0	0	0	0	0	0	0	0	0	0	0	0	0	0	0	0	0	0	0	0	0	0	0	0	0	0
0	0	0	0	0	0	0	0	0	0	0	0	0	0	0	0	0	0	0	0	0	0	0	0	0	0	0	0	0	0	0	0	0	0	0	0	0	0	0	0	0	0	0	0	0	0	0	0	0	0
[truncated: 1,429 more columns]

## Sheet: Sheet7
1	1	1	1	1	1	1	1	1	1	1	1	1	1	1	1	1	1	1	1	1	1	1	1	1	1	1	1	1	1	1	1	1	1	1	1	1	1	1	1	1	1	1	1	1	1	1	1	1	1
0.441908	0.212519	0.195205	0.629839	0.124799	3.00612	2.55393	2.91654	2.47748	1.80262	2.80956	2.55073	2.84577	2.66911	1.91897	2.74389	2.63025	1.9525	2.4126	2.0639	2.31103	3.03691	2.36835	2.16722	1.93833	1.97848	2.31883	2.99834	2.48196	2.29538	2.69452	2.18298	1.9118	2.23985	1.99771	2.65364	2.47914	1.90298	1.97081	1.82607	1.74915	1.75439	0.731192	2.22061	1.92481	1.84841	1.79285	1.77436	1.92589	2.054
0.518938	0.374884	0.207418	0.508349	0.284234	1.93491	1.505	1.72565	1.49526	0.931836	1.67383	1.51686	1.90869	1.61381	1.01103	1.57798	1.47471	1.04079	1.28588	1.17453	1.33699	1.77883	1.41733	1.33107	1.0556	1.07021	1.22853	1.81713	1.49907	1.34975	1.63475	1.3956	1.07127	1.34382	1.13067	1.68253	1.47307	1.0757	1.11373	0.896537	0.86794	0.856439	0.667654	1.49574	1.05205	0.921218	0.882444	0.888077	1.04388	1.18471
0.329678	0.305255	0.110444	0.223295	0.266711	0.833318	0.596676	0.707439	0.617291	0.353086	0.641311	0.639379	0.91001	0.680728	0.382517	0.60283	0.534178	0.380468	0.448118	0.47507	0.506056	0.682503	0.561306	0.601237	0.403731	0.380783	0.429726	0.780609	0.663147	0.524647	0.66697	0.664368	0.448612	0.576376	0.464768	0.755213	0.622347	0.460723	0.46633	0.296138	0.328772	0.29875	0.331426	0.735007	0.410836	0.307848	0.296494	0.317018	0.394625	0.476114
0.210892	0.414349	0.0392691	0.0881717	0.271807	0.999186	0.457279	0.53935	0.619998	0.215804	0.37407	0.551036	1.19934	0.564605	0.251581	0.50324	0.35078	0.292291	0.273928	0.339081	0.27417	0.439025	0.336484	0.564667	0.265962	0.231572	0.267359	0.751957	0.990852	0.309822	0.511395	0.95639	0.335912	0.518758	0.325672	1.03961	0.626586	0.347868	0.349057	0.195966	0.243567	0.230954	0.148917	0.997796	0.307219	0.19996	0.199071	0.244438	0.261966	0.319615
0.362324	0.501731	0.0635493	0.088753	0.449702	0.624335	0.298251	0.448518	0.431116	0.160274	0.229724	0.457173	0.926399	0.472198	0.179929	0.306394	0.180226	0.1557	0.111389	0.27589	0.147582	0.276359	0.243293	0.51362	0.185751	0.0998886	0.112591	0.610881	0.648215	0.194438	0.369033	0.69257	0.306016	0.432606	0.288755	0.694986	0.465529	0.330037	0.320927	0.0547723	0.192134	0.121587	0.193148	0.761781	0.224261	0.0617046	0.0694541	0.131839	0.170179	0.237183
0	0	0	0	0	0	0	0	0	0	0	0	0	0	0	0	0	0	0	0	0	0	0	0	0	0	0	0	0	0	0	0	0	0	0	0	0	0	0	0	0	0	0	0	0	0	0	0	0	0
0	0	0	0	0	0	0	0	0	0	0	0	0	0	0	0	0	0	0	0	0	0	0	0	0	0	0	0	0	0	0	0	0	0	0	0	0	0	0	0	0	0	0	0	0	0	0	0	0	0
0	0	0	0	0	0	0	0	0	0	0	0	0	0	0	0	0	0	0	0	0	0	0	0	0	0	0	0	0	0	0	0	0	0	0	0	0	0	0	0	0	0	0	0	0	0	0	0	0	0
0	0	0	0	0	0	0	0	0	0	0	0	0	0	0	0	0	0	0	0	0	0	0	0	0	0	0	0	0	0	0	0	0	0	0	0	0	0	0	0	0	0	0	0	0	0	0	0	0	0
0	0	0	0	0	0	0	0	0	0	0	0	0	0	0	0	0	0	0	0	0	0	0	0	0	0	0	0	0	0	0	0	0	0	0	0	0	0	0	0	0	0	0	0	0	0	0	0	0	0
0	0	0	0	0	0	0	0	0	0	0	0	0	0	0	0	0	0	0	0	0	0	0	0	0	0	0	0	0	0	0	0	0	0	0	0	0	0	0	0	0	0	0	0	0	0	0	0	0	0
0	0	0	0	0	0	0	0	0	0	0	0	0	0	0	0	0	0	0	0	0	0	0	0	0	0	0	0	0	0	0	0	0	0	0	0	0	0	0	0	0	0	0	0	0	0	0	0	0	0
0	0	0	0	0	0	0	0	0	0	0	0	0	0	0	0	0	0	0	0	0	0	0	0	0	0	0	0	0	0	0	0	0	0	0	0	0	0	0	0	0	0	0	0	0	0	0	0	0	0
0	0	0	0	0	0	0	0	0	0	0	0	0	0	0	0	0	0	0	0	0	0	0	0	0	0	0	0	0	0	0	0	0	0	0	0	0	0	0	0	0	0	0	0	0	0	0	0	0	0
[truncated: 1,516 more columns]

## Sheet: Sheet8
1	1	1	1	1	1	1	1	1	1	1	1	1	1	1	1	1	1	1	1	1	1	1	1	1	1	1	1	1	1	1	1	1	1	1	1	1	1	1	1	1	1	1	1	1	1	1	1	1	1
0.323827	0.925333	0.287231	0.264391	0.0172734	0.308886	0.243432	0.0925647	1.49751	1.59676	1.85703	1.73197	1.67353	2.51379	1.76401	1.56762	1.63974	1.63967	2.39985	2.1884	1.76205	1.81483	1.67041	1.44384	1.48749	1.57689	0.0706576	1.76893	1.84953	1.66267	1.50466	1.58218	1.60946	1.4108	1.47335	1.61004	1.42462	1.39043	1.68449	1.77871	1.754	1.4384	1.85409	1.89562	1.57413	1.56049	1.56575	1.64707	1.49044	1.4948
0.424806	0.748593	0.357584	0.321566	0.0540152	0.382472	0.318346	0.165698	0.856968	0.991349	1.33976	1.04923	1.05816	1.53172	1.03442	0.966715	1.04605	1.02024	1.45958	1.35746	1.07092	1.08721	1.01997	0.851017	0.911466	0.910252	0.135814	1.09518	1.15099	1.01889	0.924068	0.953463	0.916973	0.799714	0.861558	1.02662	0.81334	0.762751	1.02446	1.09887	1.10003	0.849955	1.1264	1.17883	0.968458	0.96028	0.909544	1.07454	0.909527	0.921554
0.650815	0.904738	0.482566	0.440046	0.121087	0.584453	0.477051	0.29447	0.828199	1.02746	1.57265	1.01006	1.06192	1.44281	0.95473	1.0103	1.12277	1.02313	1.37993	1.31096	1.02588	1.01691	0.99732	0.866341	0.963687	0.873114	0.229972	1.07405	1.13757	1.00402	0.961411	0.939734	0.853872	0.792928	0.867618	1.09598	0.78875	0.722377	1.01224	1.08899	1.12	0.8776	1.13562	1.21923	1.0003	0.982691	0.848923	1.18183	0.943549	0.976353
1.24604	0.550856	0.0617007	0.0874613	0.027992	0.401071	0.402495	0.155771	0.296793	0.547246	1.82439	0.284752	0.34958	0.396825	0.266195	0.427215	0.705138	0.31583	0.380739	0.377731	0.283228	0.276676	0.316579	0.387589	0.454994	0.33026	0.0439302	0.307699	0.34205	0.284115	0.416856	0.302585	0.28083	0.405293	0.35593	0.738994	0.251479	0.267633	0.361058	0.338145	0.459978	0.400904	0.441069	0.676614	0.477102	0.578076	0.245049	1.46157	0.474887	0.439195
0.645977	0.459401	0.0791564	0.121721	0.0806614	0.423549	0.340097	0.227116	0.149302	0.33629	1.02978	0.0923996	0.152692	0.102882	0.0404902	0.315575	0.471381	0.141037	0.104661	0.141355	0.085439	0.0515374	0.132771	0.239918	0.342278	0.170902	0.0803866	0.129536	0.159583	0.126475	0.281104	0.146382	0.108537	0.255972	0.25101	0.460394	0.117549	0.134745	0.183413	0.173187	0.265426	0.290159	0.292001	0.421767	0.326035	0.309181	0.0479314	0.705588	0.295744	0.335986
0	0	0	0	0	0	0	0	0	0	0	0	0	0	0	0	0	0	0	0	0	0	0	0	0	0	0	0	0	0	0	0	0	0	0	0	0	0	0	0	0	0	0	0	0	0	0	0	0	0
0	0	0	0	0	0	0	0	0	0	0	0	0	0	0	0	0	0	0	0	0	0	0	0	0	0	0	0	0	0	0	0	0	0	0	0	0	0	0	0	0	0	0	0	0	0	0	0	0	0
0	0	0	0	0	0	0	0	0	0	0	0	0	0	0	0	0	0	0	0	0	0	0	0	0	0	0	0	0	0	0	0	0	0	0	0	0	0	0	0	0	0	0	0	0	0	0	0	0	0
0	0	0	0	0	0	0	0	0	0	0	0	0	0	0	0	0	0	0	0	0	0	0	0	0	0	0	0	0	0	0	0	0	0	0	0	0	0	0	0	0	0	0	0	0	0	0	0	0	0
0	0	0	0	0	0	0	0	0	0	0	0	0	0	0	0	0	0	0	0	0	0	0	0	0	0	0	0	0	0	0	0	0	0	0	0	0	0	0	0	0	0	0	0	0	0	0	0	0	0
0	0	0	0	0	0	0	0	0	0	0	0	0	0	0	0	0	0	0	0	0	0	0	0	0	0	0	0	0	0	0	0	0	0	0	0	0	0	0	0	0	0	0	0	0	0	0	0	0	0
0	0	0	0	0	0	0	0	0	0	0	0	0	0	0	0	0	0	0	0	0	0	0	0	0	0	0	0	0	0	0	0	0	0	0	0	0	0	0	0	0	0	0	0	0	0	0	0	0	0
0	0	0	0	0	0	0	0	0	0	0	0	0	0	0	0	0	0	0	0	0	0	0	0	0	0	0	0	0	0	0	0	0	0	0	0	0	0	0	0	0	0	0	0	0	0	0	0	0	0
0	0	0	0	0	0	0	0	0	0	0	0	0	0	0	0	0	0	0	0	0	0	0	0	0	0	0	0	0	0	0	0	0	0	0	0	0	0	0	0	0	0	0	0	0	0	0	0	0	0
[truncated: 1,462 more columns]

## Sheet: Sheet9
1	1	1	1	1	1	1	1	1	1	1	1	1	1	1	1	1	1	1	1	1	1	1	1	1	1	1	1	1	1	1	1	1	1	1	1	1	1	1	1	1	1	1	1	1	1	1	1	1	1
0.289123	0.157264	0.0754532	0.217058	0.0616187	1.28979	0.969256	0.990517	1.07546	1.42389	1.46259	1.12618	1.07636	1.32436	1.11668	1.05292	1.27868	1.05727	1.08591	1.07728	1.01903	1.32024	1.01842	1.02684	1.06803	1.00354	1.11074	1.28706	0.994034	1.38478	1.2037	1.06772	1.07839	1.03366	1.15092	1.08973	1.30751	1.02972	1.16394	0.991407	1.11801	0.957244	1.59636	1.44446	1.22768	1.09037	0.965866	1.03611	1.83912	1.59598
0.396445	0.353745	0.157686	0.346661	0.167329	1.14884	0.790345	0.806818	0.927168	1.28484	1.2982	1.01517	0.937362	1.26202	1.03477	0.918047	1.11717	0.961337	0.920342	0.928427	0.888308	1.18023	0.835121	0.871806	0.94639	0.846735	1.02575	1.12139	0.815302	1.23827	1.1013	0.923775	0.955362	0.838915	1.0023	0.964309	1.21148	0.897912	1.08504	0.815014	0.958411	0.74588	1.56973	1.38704	1.10932	0.921336	0.77616	0.894728	1.81779	1.545
0.279299	0.361381	0.137804	0.263084	0.175002	0.606996	0.420685	0.417885	0.489936	0.69156	0.680176	0.567803	0.511877	0.79567	0.641157	0.50554	0.589598	0.586506	0.480434	0.510782	0.525653	0.644568	0.415732	0.477537	0.536203	0.453484	0.618861	0.593502	0.421835	0.673393	0.596318	0.492652	0.540429	0.421933	0.531608	0.534693	0.683535	0.51372	0.647295	0.424979	0.501657	0.367134	0.976248	0.809683	0.614858	0.475948	0.404655	0.501433	1.15529	0.93152
0.102934	0.405213	0.032394	0.137409	0.111351	0.267739	0.194455	0.216258	0.221349	0.385076	0.318345	0.264793	0.252708	1.29252	0.62809	0.256818	0.248478	0.483843	0.224149	0.339343	0.390373	0.332401	0.187825	0.264618	0.336505	0.218105	0.520227	0.258677	0.197208	0.336152	0.239114	0.220862	0.27767	0.198789	0.234671	0.271082	0.34416	0.343435	0.536883	0.205098	0.218577	0.179648	0.961022	0.479797	0.27027	0.212156	0.200371	0.300251	1.54576	0.726908
0.3731	0.601906	0.19034	0.369793	0.270436	0.753205	0.530416	0.527039	0.61156	0.878196	0.844322	0.727738	0.649868	1.1889	0.922231	0.649259	0.725754	0.827831	0.599509	0.674789	0.732637	0.819503	0.500337	0.623344	0.708758	0.573109	0.8603	0.735899	0.524603	0.855989	0.733675	0.61562	0.706483	0.518503	0.662707	0.688225	0.885963	0.692732	0.88983	0.53181	0.620199	0.44867	1.39229	1.07975	0.785169	0.587063	0.511522	0.661193	1.69927	1.28859
0	0	0	0	0	0	0	0	0	0	0	0	0	0	0	0	0	0	0	0	0	0	0	0	0	0	0	0	0	0	0	0	0	0	0	0	0	0	0	0	0	0	0	0	0	0	0	0	0	0
0	0	0	0	0	0	0	0	0	0	0	0	0	0	0	0	0	0	0	0	0	0	0	0	0	0	0	0	0	0	0	0	0	0	0	0	0	0	0	0	0	0	0	0	0	0	0	0	0	0
0	0	0	0	0	0	0	0	0	0	0	0	0	0	0	0	0	0	0	0	0	0	0	0	0	0	0	0	0	0	0	0	0	0	0	0	0	0	0	0	0	0	0	0	0	0	0	0	0	0
0	0	0	0	0	0	0	0	0	0	0	0	0	0	0	0	0	0	0	0	0	0	0	0	0	0	0	0	0	0	0	0	0	0	0	0	0	0	0	0	0	0	0	0	0	0	0	0	0	0
0	0	0	0	0	0	0	0	0	0	0	0	0	0	0	0	0	0	0	0	0	0	0	0	0	0	0	0	0	0	0	0	0	0	0	0	0	0	0	0	0	0	0	0	0	0	0	0	0	0
0	0	0	0	0	0	0	0	0	0	0	0	0	0	0	0	0	0	0	0	0	0	0	0	0	0	0	0	0	0	0	0	0	0	0	0	0	0	0	0	0	0	0	0	0	0	0	0	0	0
0	0	0	0	0	0	0	0	0	0	0	0	0	0	0	0	0	0	0	0	0	0	0	0	0	0	0	0	0	0	0	0	0	0	0	0	0	0	0	0	0	0	0	0	0	0	0	0	0	0
0	0	0	0	0	0	0	0	0	0	0	0	0	0	0	0	0	0	0	0	0	0	0	0	0	0	0	0	0	0	0	0	0	0	0	0	0	0	0	0	0	0	0	0	0	0	0	0	0	0
0	0	0	0	0	0	0	0	0	0	0	0	0	0	0	0	0	0	0	0	0	0	0	0	0	0	0	0	0	0	0	0	0	0	0	0	0	0	0	0	0	0	0	0	0	0	0	0	0	0
[truncated: 1,436 more columns]

[truncated: 91 more sheets: Sheet10, Sheet11, Sheet12, Sheet13, Sheet14, Sheet15, Sheet16, Sheet17, Sheet18, Sheet19, Sheet20, Sheet21, Sheet22, Sheet23, Sheet24, Sheet25, Sheet26, Sheet27, Sheet28, Sheet29 …]
