# Supplementary material for: Dissecting multilayer cell–cell communications with signaling feedback loops from spatial transcriptomics data
Source: HighWire-hosted journal article supplement (doi:10.1101/gr.279857.124), 2025-04-22
Supplement: Supplemental_Table_S7.xlsx [file Supplemental_Table_S7.xlsx]

## Sheet: Table S7
Sheet1	The spatial coordinates of 100 groups of data in simulation dataset 1-group 1
Sheet2	The spatial coordinates of 100 groups of data in simulation dataset 1-group 2
Sheet3	The spatial coordinates of 100 groups of data in simulation dataset 1-group 3
Sheet4	The spatial coordinates of 100 groups of data in simulation dataset 1-group 4
Sheet5	The spatial coordinates of 100 groups of data in simulation dataset 1-group 5
Sheet6	The spatial coordinates of 100 groups of data in simulation dataset 1-group 6
Sheet7	The spatial coordinates of 100 groups of data in simulation dataset 1-group 7
Sheet8	The spatial coordinates of 100 groups of data in simulation dataset 1-group 8
Sheet9	The spatial coordinates of 100 groups of data in simulation dataset 1-group 9
Sheet10	The spatial coordinates of 100 groups of data in simulation dataset 1-group 10
Sheet11	The spatial coordinates of 100 groups of data in simulation dataset 1-group 11
Sheet12	The spatial coordinates of 100 groups of data in simulation dataset 1-group 12
Sheet13	The spatial coordinates of 100 groups of data in simulation dataset 1-group 13
Sheet14	The spatial coordinates of 100 groups of data in simulation dataset 1-group 14
Sheet15	The spatial coordinates of 100 groups of data in simulation dataset 1-group 15
Sheet16	The spatial coordinates of 100 groups of data in simulation dataset 1-group 16
Sheet17	The spatial coordinates of 100 groups of data in simulation dataset 1-group 17
Sheet18	The spatial coordinates of 100 groups of data in simulation dataset 1-group 18
Sheet19	The spatial coordinates of 100 groups of data in simulation dataset 1-group 19
Sheet20	The spatial coordinates of 100 groups of data in simulation dataset 1-group 20
Sheet21	The spatial coordinates of 100 groups of data in simulation dataset 1-group 21
Sheet22	The spatial coordinates of 100 groups of data in simulation dataset 1-group 22
Sheet23	The spatial coordinates of 100 groups of data in simulation dataset 1-group 23
Sheet24	The spatial coordinates of 100 groups of data in simulation dataset 1-group 24
Sheet25	The spatial coordinates of 100 groups of data in simulation dataset 1-group 25
Sheet26	The spatial coordinates of 100 groups of data in simulation dataset 1-group 26
Sheet27	The spatial coordinates of 100 groups of data in simulation dataset 1-group 27
Sheet28	The spatial coordinates of 100 groups of data in simulation dataset 1-group 28
Sheet29	The spatial coordinates of 100 groups of data in simulation dataset 1-group 29
Sheet30	The spatial coordinates of 100 groups of data in simulation dataset 1-group 30
Sheet31	The spatial coordinates of 100 groups of data in simulation dataset 1-group 31
Sheet32	The spatial coordinates of 100 groups of data in simulation dataset 1-group 32
Sheet33	The spatial coordinates of 100 groups of data in simulation dataset 1-group 33
Sheet34	The spatial coordinates of 100 groups of data in simulation dataset 1-group 34
Sheet35	The spatial coordinates of 100 groups of data in simulation dataset 1-group 35
Sheet36	The spatial coordinates of 100 groups of data in simulation dataset 1-group 36
Sheet37	The spatial coordinates of 100 groups of data in simulation dataset 1-group 37
Sheet38	The spatial coordinates of 100 groups of data in simulation dataset 1-group 38
Sheet39	The spatial coordinates of 100 groups of data in simulation dataset 1-group 39
Sheet40	The spatial coordinates of 100 groups of data in simulation dataset 1-group 40
Sheet41	The spatial coordinates of 100 groups of data in simulation dataset 1-group 41
Sheet42	The spatial coordinates of 100 groups of data in simulation dataset 1-group 42
Sheet43	The spatial coordinates of 100 groups of data in simulation dataset 1-group 43
Sheet44	The spatial coordinates of 100 groups of data in simulation dataset 1-group 44
Sheet45	The spatial coordinates of 100 groups of data in simulation dataset 1-group 45
Sheet46	The spatial coordinates of 100 groups of data in simulation dataset 1-group 46
Sheet47	The spatial coordinates of 100 groups of data in simulation dataset 1-group 47
Sheet48	The spatial coordinates of 100 groups of data in simulation dataset 1-group 48
Sheet49	The spatial coordinates of 100 groups of data in simulation dataset 1-group 49
Sheet50	The spatial coordinates of 100 groups of data in simulation dataset 1-group 50
Sheet51	The spatial coordinates of 100 groups of data in simulation dataset 1-group 51
Sheet52	The spatial coordinates of 100 groups of data in simulation dataset 1-group 52
Sheet53	The spatial coordinates of 100 groups of data in simulation dataset 1-group 53
Sheet54	The spatial coordinates of 100 groups of data in simulation dataset 1-group 54
Sheet55	The spatial coordinates of 100 groups of data in simulation dataset 1-group 55
Sheet56	The spatial coordinates of 100 groups of data in simulation dataset 1-group 56
Sheet57	The spatial coordinates of 100 groups of data in simulation dataset 1-group 57
Sheet58	The spatial coordinates of 100 groups of data in simulation dataset 1-group 58
Sheet59	The spatial coordinates of 100 groups of data in simulation dataset 1-group 59
Sheet60	The spatial coordinates of 100 groups of data in simulation dataset 1-group 60
Sheet61	The spatial coordinates of 100 groups of data in simulation dataset 1-group 61
Sheet62	The spatial coordinates of 100 groups of data in simulation dataset 1-group 62
Sheet63	The spatial coordinates of 100 groups of data in simulation dataset 1-group 63
Sheet64	The spatial coordinates of 100 groups of data in simulation dataset 1-group 64
Sheet65	The spatial coordinates of 100 groups of data in simulation dataset 1-group 65
Sheet66	The spatial coordinates of 100 groups of data in simulation dataset 1-group 66
Sheet67	The spatial coordinates of 100 groups of data in simulation dataset 1-group 67
Sheet68	The spatial coordinates of 100 groups of data in simulation dataset 1-group 68
Sheet69	The spatial coordinates of 100 groups of data in simulation dataset 1-group 69
Sheet70	The spatial coordinates of 100 groups of data in simulation dataset 1-group 70
Sheet71	The spatial coordinates of 100 groups of data in simulation dataset 1-group 71
Sheet72	The spatial coordinates of 100 groups of data in simulation dataset 1-group 72
Sheet73	The spatial coordinates of 100 groups of data in simulation dataset 1-group 73
Sheet74	The spatial coordinates of 100 groups of data in simulation dataset 1-group 74
Sheet75	The spatial coordinates of 100 groups of data in simulation dataset 1-group 75
Sheet76	The spatial coordinates of 100 groups of data in simulation dataset 1-group 76
Sheet77	The spatial coordinates of 100 groups of data in simulation dataset 1-group 77
Sheet78	The spatial coordinates of 100 groups of data in simulation dataset 1-group 78
Sheet79	The spatial coordinates of 100 groups of data in simulation dataset 1-group 79
Sheet80	The spatial coordinates of 100 groups of data in simulation dataset 1-group 80
Sheet81	The spatial coordinates of 100 groups of data in simulation dataset 1-group 81
Sheet82	The spatial coordinates of 100 groups of data in simulation dataset 1-group 82
Sheet83	The spatial coordinates of 100 groups of data in simulation dataset 1-group 83
Sheet84	The spatial coordinates of 100 groups of data in simulation dataset 1-group 84
Sheet85	The spatial coordinates of 100 groups of data in simulation dataset 1-group 85
Sheet86	The spatial coordinates of 100 groups of data in simulation dataset 1-group 86
Sheet87	The spatial coordinates of 100 groups of data in simulation dataset 1-group 87
Sheet88	The spatial coordinates of 100 groups of data in simulation dataset 1-group 88
Sheet89	The spatial coordinates of 100 groups of data in simulation dataset 1-group 89
Sheet90	The spatial coordinates of 100 groups of data in simulation dataset 1-group 90
Sheet91	The spatial coordinates of 100 groups of data in simulation dataset 1-group 91
Sheet92	The spatial coordinates of 100 groups of data in simulation dataset 1-group 92
Sheet93	The spatial coordinates of 100 groups of data in simulation dataset 1-group 93
Sheet94	The spatial coordinates of 100 groups of data in simulation dataset 1-group 94
Sheet95	The spatial coordinates of 100 groups of data in simulation dataset 1-group 95
Sheet96	The spatial coordinates of 100 groups of data in simulation dataset 1-group 96
Sheet97	The spatial coordinates of 100 groups of data in simulation dataset 1-group 97
Sheet98	The spatial coordinates of 100 groups of data in simulation dataset 1-group 98
Sheet99	The spatial coordinates of 100 groups of data in simulation dataset 1-group 99
Sheet100	The spatial coordinates of 100 groups of data in simulation dataset 1-group 100

## Sheet: Sheet1
1	50	1
1	61	1
1	68	1
1	69	1
1	72	1
1	99	1
1	5	2
1	45	2
1	72	2
1	82	2
1	99	2
1	60	3
1	13	4
1	23	4
1	24	4
1	35	4
1	44	4
1	26	5
1	39	5
1	54	5
1	74	5
1	84	5
1	87	5
1	90	5
1	19	6
1	27	6
1	67	6
1	75	6
1	78	6
1	31	7
1	40	7
1	68	7
1	90	7
1	92	7
1	1	8
1	12	8
1	34	8
1	49	8
1	56	8
1	74	8
1	86	8
1	89	8
1	25	9
1	36	9
1	38	9
1	86	9
1	52	10
1	65	10
1	74	10
1	96	10
1	68	11
1	74	11
1	75	11
1	96	11
1	12	12
1	34	12
1	82	12
1	83	12
1	96	12
1	8	13
1	23	13
1	38	13
1	66	13
1	3	14
1	68	14
1	10	15
1	31	15
1	56	15
1	85	15
1	92	15
1	99	16
1	12	17
1	51	17
1	65	17
1	8	18
1	21	18
1	24	18
1	28	18
1	45	18
1	46	18
1	65	18
1	73	18
1	80	18
1	83	18
1	98	18
1	36	19
1	68	19
1	92	19
1	12	20
1	14	20
1	42	20
1	70	20
1	72	20
1	95	20
1	99	20
1	100	20
1	17	21
1	53	21
1	77	21
1	11	22
1	28	22
1	39	22
1	73	22
1	79	22
1	83	22
1	87	22
1	98	22
1	12	23
1	20	23
1	35	23
1	38	23
1	48	23
1	63	23
1	66	23
1	71	23
1	82	23
1	88	23
1	95	23
1	26	24
1	67	24
1	7	25
1	25	25
1	44	25
1	61	25
1	62	25
1	76	26
1	98	26
1	100	26
1	33	27
1	45	27
1	46	27
1	80	27
1	81	27
1	90	27
1	1	28
1	12	28
1	64	28
1	86	28
1	34	29
1	51	29
1	58	29
1	75	29
1	82	29
1	90	29
1	4	30
1	81	30
1	90	30
1	14	31
1	46	31
1	61	31
1	72	31
1	92	31
1	17	32
1	18	32
1	42	32
1	98	32
1	5	33
1	23	33
1	25	33
1	26	33
1	31	33
1	43	33
1	73	33
1	91	33
1	1	34
1	10	34
1	26	34
1	52	34
1	68	34
1	98	34
1	29	35
1	36	35
1	38	35
1	64	35
1	72	35
1	78	35
1	90	35
1	94	35
1	8	36
1	21	36
1	24	36
1	48	36
1	64	36
1	90	36
1	26	37
1	29	37
1	30	37
1	41	37
1	80	37
1	12	38
1	42	38
1	47	38
1	51	38
1	53	38
1	99	38
1	44	39
1	68	39
1	2	40
1	19	40
1	21	40
1	25	40
1	36	40
1	78	40
1	1	41
1	2	41
1	62	41
1	78	41
1	87	41
1	10	42
1	25	42
1	61	42
1	35	43
1	68	43
1	88	43
1	11	44
1	23	44
1	39	44
1	6	45
1	9	45
1	57	45
1	64	45
1	66	45
1	78	45
1	83	45
1	15	46
1	45	46
1	74	46
1	90	46
1	4	47
1	84	47
1	37	48
1	81	48
1	18	49
1	38	49
1	42	49
1	68	49
1	96	49
1	27	50
1	32	50
1	37	50
1	57	50
1	68	50
1	81	50
1	10	51
1	28	51
1	31	51
1	49	51
1	63	51
1	84	51
1	23	52
1	54	52
1	60	52
1	69	52
1	79	52
1	82	52
1	83	52
1	44	53
1	75	53
1	77	53
1	95	53
1	25	54
1	47	54
1	61	54
1	77	54
1	85	54
1	9	55
1	16	55
1	43	55
1	70	55
1	95	55
1	24	56
1	40	56
1	4	57
1	7	57
1	22	57
1	38	57
1	55	57
1	64	57
1	73	57
1	1	58
1	17	58
1	62	58
1	13	59
1	14	59
1	17	59
1	33	59
1	48	59
1	94	59
1	1	60
1	8	60
1	35	60
1	58	60
1	73	60
1	77	60
1	81	60
1	99	60
1	14	61
1	25	61
1	46	61
1	67	61
1	72	61
1	96	61
1	12	62
1	31	62
1	58	62
1	65	62
1	79	62
1	24	63
1	41	63
1	91	63
1	39	64
1	71	64
1	91	64
1	9	65
1	27	65
1	46	65
1	60	65
1	98	65
1	26	66
1	51	66
1	72	66
1	100	66
1	17	67
1	19	67
1	20	67
1	75	67
1	82	67
1	26	68
1	66	68
1	68	68
1	98	68
1	21	69
1	54	69
1	70	69
1	81	69
1	83	69
1	4	70
1	11	70
1	39	70
1	54	70
1	69	70
1	83	70
1	30	71
1	36	71
1	42	71
1	47	71
1	60	71
1	76	71
1	79	71
1	16	72
1	58	72
1	60	72
1	96	72
1	15	73
1	23	73
1	36	73
1	47	73
1	63	73
1	75	73
1	91	73
1	67	74
1	70	74
1	73	74
1	87	74
1	93	74
1	16	75
1	31	75
1	44	75
1	52	75
1	65	75
1	85	75
1	86	75
1	88	75
1	91	75
1	95	75
1	8	76
1	28	76
1	34	76
1	39	76
1	59	76
1	60	76
1	61	76
1	72	76
1	78	76
1	99	76
1	16	77
1	51	77
1	65	77
1	75	77
1	77	77
1	92	77
1	75	78
1	95	78
1	10	79
1	32	79
1	50	79
1	58	79
1	85	79
1	1	80
1	15	80
1	35	80
1	66	80
1	28	81
1	58	81
1	90	81
1	27	82
1	45	82
1	65	82
1	76	82
1	1	83
1	8	83
1	10	83
1	31	83
1	36	83
1	46	83
1	55	83
1	62	83
1	94	83
1	17	84
1	84	84
1	3	85
1	12	85
1	14	85
1	20	85
1	95	85
1	3	86
1	19	86
1	38	86
1	59	86
1	72	86
1	91	86
1	93	86
1	41	87
1	43	87
1	61	87
1	3	88
1	23	88
1	78	88
1	85	88
1	90	88
1	6	89
1	18	89
1	22	89
1	48	89
1	63	89
1	69	89
1	2	90
1	12	90
1	61	90
1	63	90
1	82	90
1	97	90
1	5	91
1	14	91
1	22	91
1	55	91
1	88	91
1	89	91
1	37	92
1	50	92
1	64	92
1	97	92
1	3	93
1	24	93
1	41	93
1	52	93
1	41	94
1	71	94
1	86	94
1	89	94
1	41	95
1	58	95
1	64	95
1	16	96
1	60	96
1	61	96
1	87	96
1	8	97
1	46	97
1	50	97
1	76	97
1	27	98
1	33	98
1	34	98
1	75	98
1	96	98
1	98	98
1	18	99
1	52	99
1	72	99
1	78	99
1	30	100
1	34	100
1	36	100
1	57	100
2	62	1
2	67	1
2	84	1
2	65	2
2	70	2
2	73	2
2	97	2
2	13	3
2	29	3
2	76	3
2	12	4
2	76	4
2	79	4
2	95	4
2	17	5
2	19	5
2	27	5
2	55	5
2	60	5
2	71	5
2	6	6
2	62	6
2	93	6
2	10	7
2	25	7
2	34	7
2	65	7
2	84	7
2	94	7
2	3	8
2	4	8
2	17	8
2	27	8
2	31	8
2	55	8
2	75	8
2	49	9
2	56	9
2	81	9
2	45	10
2	49	10
2	66	10
2	81	10
2	10	11
2	11	11
2	36	11
2	56	11
2	83	11
2	88	11
2	44	12
2	86	12
2	39	13
2	43	13
2	48	13
2	64	13
2	74	13
2	76	13
2	88	13
2	13	14
2	41	14
2	70	14
2	5	15
2	27	15
2	37	15
2	54	15
2	57	15
2	96	15
2	18	16
2	25	16
2	26	16
2	32	16
2	55	16
2	63	16
2	94	16
2	7	17
2	14	17
2	68	17
2	87	17
2	89	17
2	2	18
2	24	18
2	79	18
2	96	18
2	11	19
2	35	19
2	36	19
2	69	19
2	73	19
2	75	19
2	29	20
2	73	20
2	76	20
2	98	20
2	10	21
2	41	21
2	53	21
2	78	21
2	61	22
2	79	22
2	93	22
2	100	22
2	14	23
2	16	23
2	23	23
2	24	23
2	56	23
2	63	23
2	78	23
2	23	24
2	40	24
2	88	24
2	89	24
2	11	25
2	53	25
2	56	25
2	8	26
2	40	26
2	44	26
2	86	26
2	2	27
2	16	27
2	28	27
2	47	27
2	70	27
2	75	27
2	93	27
2	96	27
2	100	27
2	19	28
2	36	28
2	88	28
2	80	29
2	84	29
2	10	30
2	29	30
2	43	30
2	51	30
2	72	30
2	90	30
2	94	30
2	49	31
2	50	31
2	82	31
2	86	31
2	21	32
2	52	32
2	65	32
2	82	32
2	86	32
2	1	33
2	31	34
2	38	34
2	42	34
2	57	34
2	58	34
2	77	34
2	97	34
2	1	35
2	17	35
2	77	35
2	80	35
2	9	36
2	19	36
2	27	36
2	38	36
2	46	36
2	51	36
2	55	36
2	41	37
2	67	37
2	68	37
2	87	37
2	89	37
2	21	38
2	28	38
2	29	38
2	49	38
2	35	39
2	56	39
2	58	39
2	65	39
2	84	39
2	93	39
2	96	39
2	98	39
2	100	39
2	10	40
2	30	40
2	32	40
2	65	40
2	82	40
2	96	40
2	3	41
2	31	41
2	64	41
2	4	42
2	7	42
2	14	42
2	46	42
2	69	42
2	93	42
2	19	43
2	26	43
2	29	43
2	37	43
2	45	43
2	48	43
2	67	43
2	97	43
2	3	44
2	18	44
2	26	44
2	30	44
2	31	44
2	57	44
2	3	45
2	17	45
2	28	45
2	45	45
2	62	45
2	70	45
2	88	45
2	9	46
2	46	46
2	61	46
2	67	46
2	92	46
2	15	47
2	32	47
2	56	47
2	73	47
2	15	48
2	28	48
2	30	48
2	35	48
2	50	48
2	59	48
2	64	48
2	81	48
2	84	48
2	96	48
2	27	49
2	39	49
2	63	49
2	75	49
2	94	49
2	15	50
2	20	50
2	34	50
2	36	50
2	63	50
2	10	51
2	55	51
2	56	51
2	69	51
2	70	51
2	8	52
2	45	52
2	89	52
2	91	52
2	44	53
2	55	53
2	67	53
2	68	53
2	58	54
2	63	54
2	65	54
2	12	55
2	93	55
2	18	56
2	34	56
2	68	56
2	87	56
2	93	56
2	34	57
2	41	57
2	58	57
2	94	57
2	22	58
2	32	58
2	39	58
2	66	58
2	72	58
2	76	58
2	87	58
2	97	58
2	11	59
2	32	59
2	63	59
2	75	59
2	84	59
2	99	59
2	25	60
2	41	60
2	53	60
2	58	60
2	85	60
2	93	60
2	99	60
2	21	61
2	90	61
2	1	62
2	5	62
2	31	62
2	71	62
2	100	62
2	2	63
2	22	63
2	56	63
2	62	63
2	76	63
2	82	63
2	95	63
2	99	63
2	52	64
2	59	64
2	92	64
2	7	65
2	67	65
2	13	66
2	31	66
2	38	66
2	77	66
2	83	66
2	88	66
2	4	67
2	11	67
2	13	67
2	29	67
2	42	67
2	19	68
2	24	68
2	41	68
2	44	68
2	80	68
2	90	68
2	52	69
2	47	70
2	67	70
2	78	70
2	87	70
2	98	70
2	1	71
2	14	71
2	72	71
2	88	71
2	100	71
2	37	72
2	58	72
2	17	73
2	20	73
2	30	73
2	32	73
2	75	73
2	31	74
2	33	74
2	51	74
2	52	74
2	19	75
2	27	75
2	41	75
2	45	75
2	56	75
2	4	76
2	52	76
2	55	76
2	62	76
2	75	76
2	80	76
2	81	76
2	4	77
2	45	77
2	77	77
2	88	77
2	28	78
2	84	78
2	6	79
2	22	79
2	26	79
2	56	79
2	57	79
2	95	79
2	16	80
2	77	80
2	94	80
2	15	81
2	23	81
2	57	81
2	27	82
2	30	82
2	43	82
2	45	82
2	47	82
2	59	82
2	63	82
2	88	82
2	28	83
2	29	83
2	30	83
2	57	83
2	62	83
2	72	83
2	80	83
2	87	83
2	93	83
2	2	84
2	46	84
2	49	84
2	55	84
2	63	84
2	68	84
2	100	84
2	54	85
2	68	85
2	69	85
2	91	85
2	6	86
2	28	86
2	30	86
2	39	86
2	23	87
2	30	87
2	31	87
2	38	87
2	62	87
2	84	87
2	86	87
2	4	88
2	25	88
2	43	88
2	46	88
2	80	88
2	19	89
2	49	89
2	65	89
2	91	89
2	55	90
2	58	90
2	76	90
2	92	90
2	40	91
2	56	91
2	62	91
2	1	92
2	3	92
2	54	92
2	72	92
2	81	92
2	14	93
2	30	93
2	98	93
2	100	93
2	20	94
2	24	94
2	69	94
2	81	94
2	89	94
2	1	95
2	49	95
2	58	95
2	69	95
2	73	95
2	76	95
2	90	95
2	1	96
2	20	96
2	21	96
2	43	96
2	47	96
2	49	96
2	55	96
2	56	96
2	58	96
2	95	96
2	11	97
2	30	97
2	45	97
2	61	97
2	17	98
2	97	98
2	92	99
2	93	99
2	5	100
2	15	100
2	25	100
2	65	100
2	82	100
3	11	1
3	31	1
3	62	1
3	88	1
3	98	1
3	36	2
3	40	2
3	55	2
3	14	3
3	42	3
3	54	3
3	55	3
3	70	3
3	74	3
3	94	3
3	24	4
3	41	4
3	51	4
3	69	4
3	84	4
3	8	5
3	9	5
3	15	5
3	38	5
3	60	5
3	33	6
3	58	6
3	66	6
3	73	6
3	83	6
3	100	6
3	15	7
3	40	7
3	44	7
3	52	7
3	62	7
3	74	7
3	19	8
3	54	8
3	72	8
3	75	8
3	77	8
3	91	8
3	31	9
3	39	9
3	49	9
3	2	10
3	8	10
3	97	10
3	11	11
3	13	11
3	23	11
3	26	11
3	29	11
3	32	11
3	42	11
3	97	11
3	47	12
3	53	12
3	62	12
3	67	12
3	99	12
3	4	13
3	28	13
3	48	13
3	80	13
3	87	13
3	98	13
3	43	14
3	45	14
3	46	14
3	56	14
3	80	14
3	89	14
3	93	14
3	3	15
3	11	15
3	27	15
3	34	15
3	46	15
3	53	15
3	4	16
3	15	16
3	25	16
3	36	16
3	59	16
3	70	16
3	92	16
3	3	17
3	5	17
3	25	17
3	54	17
3	63	17
3	68	17
3	90	17
3	91	17
3	93	17
3	7	18
3	11	18
3	15	18
3	54	18
3	66	18
3	74	18
3	14	19
3	46	19
3	56	19
3	57	19
3	61	19
3	89	19
3	100	19
3	39	20
3	47	20
3	53	20
3	70	20
3	73	20
3	80	20
3	98	20
3	16	21
3	28	21
3	30	21
3	37	21
3	41	21
3	43	21
3	68	21
3	70	21
3	95	21
3	27	22
3	53	22
3	57	22
3	63	22
3	4	23
3	68	23
3	5	24
3	18	24
3	21	24
3	57	24
3	94	24
3	96	24
3	97	24
3	28	25
3	39	25
3	44	25
3	59	25
3	99	25
3	2	26
3	13	26
3	78	26
3	90	26
3	95	26
3	5	27
3	41	27
3	72	27
3	92	27
3	98	27
3	24	28
3	57	28
3	89	28
3	92	28
3	12	29
3	19	29
3	26	29
3	30	29
3	54	29
3	65	29
3	94	29
3	100	29
3	37	30
3	38	30
3	60	30
3	72	30
3	91	30
3	21	31
3	54	31
3	61	31
3	84	31
3	4	32
3	5	32
3	25	32
3	40	32
3	62	32
3	76	32
3	91	32
3	13	33
3	59	33
3	5	34
3	30	34
3	81	34
3	86	34
3	91	34
3	38	35
3	73	35
3	24	36
3	43	36
3	53	36
3	96	36
3	25	37
3	48	37
3	61	37
3	78	37
3	54	38
3	57	38
3	71	38
3	90	38
3	97	38
3	9	39
3	17	39
3	51	39
3	59	39
3	83	39
3	7	40
3	34	40
3	50	41
3	57	41
3	1	42
3	13	42
3	36	42
3	49	42
3	63	42
3	67	42
3	71	42
3	26	43
3	32	43
3	33	43
3	35	43
3	52	43
3	58	43
3	66	43
3	81	43
3	88	43
3	1	44
3	5	44
3	40	44
3	67	44
3	93	44
3	96	44
3	22	45
3	30	45
3	44	45
3	83	45
3	86	45
3	11	46
3	48	46
3	71	46
3	81	46
3	100	46
3	16	47
3	71	47
3	73	47
3	82	47
3	20	48
3	61	48
3	13	49
3	43	49
3	46	49
3	65	49
3	85	49
3	69	50
3	72	50
3	51	51
3	53	51
3	73	51
3	88	51
3	90	51
3	93	51
3	7	52
3	18	52
3	19	52
3	34	52
3	68	52
3	82	52
3	32	53
3	36	53
3	41	53
3	42	53
3	65	53
3	78	53
3	89	53
3	7	54
3	32	54
3	55	54
3	63	54
3	67	54
3	77	54
3	80	54
3	2	55
3	8	55
3	16	55
3	21	55
3	30	55
3	33	55
3	7	56
3	8	56
3	23	56
3	39	56
3	58	56
3	69	56
3	84	56
3	96	56
3	16	57
3	17	57
3	61	57
3	3	58
3	27	58
3	32	58
3	19	59
3	31	59
3	43	59
3	57	59
3	62	59
3	77	59
3	42	60
3	47	60
3	52	60
3	53	60
3	86	60
3	22	61
3	43	61
3	68	61
3	69	61
3	86	61
3	98	61
3	17	62
3	23	62
3	34	62
3	48	62
3	66	62
3	73	62
3	7	63
3	31	63
3	81	63
3	92	63
3	3	64
3	7	64
3	9	64
3	27	64
3	40	64
3	72	64
3	77	64
3	78	64
3	81	64
3	88	64
3	98	64
3	99	64
3	13	65
3	16	65
3	28	65
3	38	65
3	49	65
3	54	65
3	58	65
3	86	65
3	88	65
3	11	66
3	24	66
3	31	66
3	66	67
3	90	67
3	17	68
3	37	68
3	51	69
3	78	69
3	24	71
3	81	71
3	85	71
3	15	72
3	30	72
3	83	72
3	12	73
3	65	73
3	68	73
3	10	74
3	31	74
3	40	74
3	42	74
3	44	74
3	52	74
3	54	74
3	63	74
3	1	75
3	68	75
3	94	75
3	100	75
3	36	76
3	75	76
3	76	77
3	97	77
3	32	78
3	44	78
3	52	78
3	56	78
3	61	78
3	75	78
3	85	78
3	99	78
3	25	79
3	28	79
3	41	79
3	45	79
3	49	79
3	90	79
3	92	79
3	23	81
3	43	81
3	62	81
3	66	81
3	94	81
3	16	82
3	22	82
3	42	82
3	95	82
3	2	83
3	11	83
3	15	83
3	42	83
3	76	83
3	14	84
3	34	84
3	43	84
3	61	84
3	66	84
3	7	85
3	39	85
3	40	85
3	56	85
3	68	85
3	79	85
3	94	85
3	18	86
3	30	86
3	47	86
3	49	86
3	55	86
3	60	86
3	61	86
3	63	86
3	67	86
3	90	86
3	40	87
3	63	87
3	91	87
3	12	88
3	15	88
3	22	88
3	34	88
3	72	88
3	27	89
3	41	89
3	50	89
3	52	89
3	71	89
3	97	89
3	21	90
3	23	90
3	28	90
3	49	90
3	92	90
3	96	90
3	19	91
3	30	91
3	34	91
3	35	91
3	44	91
3	47	91
3	51	91
3	58	91
3	66	91
3	87	91
3	13	92
3	64	92
3	71	92
3	99	92
3	1	93
3	7	93
3	14	93
3	40	93
3	75	93
3	2	94
3	48	94
3	75	94
3	88	94
3	55	95
3	3	96
3	44	97
3	45	97
3	52	97
3	11	98
3	29	98
3	42	98
3	64	98
3	75	98
3	96	98
3	98	98
3	57	99
3	72	99
3	84	99
3	95	99
3	17	100
3	22	100
3	23	100
3	35	100
3	47	100
3	58	100

## Sheet: Sheet2
1	18	1
1	32	1
1	36	1
1	45	1
1	14	2
1	48	2
1	52	2
1	57	2
1	76	2
1	86	2
1	24	3
1	28	3
1	30	3
1	31	3
1	43	3
1	50	3
1	92	3
1	93	3
1	89	4
1	20	5
1	60	5
1	85	5
1	4	6
1	34	6
1	49	6
1	57	6
1	69	6
1	72	6
1	74	6
1	89	6
1	7	7
1	39	7
1	47	8
1	60	8
1	34	9
1	47	9
1	76	9
1	80	9
1	86	9
1	11	10
1	34	10
1	51	10
1	63	10
1	96	10
1	2	11
1	21	11
1	23	11
1	29	11
1	33	11
1	45	11
1	51	11
1	86	11
1	92	11
1	3	12
1	25	12
1	58	12
1	94	12
1	13	13
1	27	13
1	83	13
1	15	14
1	16	14
1	27	14
1	49	14
1	63	14
1	8	15
1	40	15
1	82	15
1	15	16
1	23	16
1	9	17
1	50	17
1	66	17
1	21	18
1	59	18
1	91	18
1	2	19
1	4	19
1	49	19
1	76	19
1	91	19
1	1	20
1	10	20
1	69	20
1	82	20
1	100	20
1	3	21
1	12	21
1	16	21
1	44	21
1	51	21
1	83	21
1	89	21
1	3	22
1	21	22
1	89	22
1	100	22
1	2	23
1	19	23
1	21	23
1	27	23
1	43	23
1	49	23
1	85	23
1	2	24
1	3	24
1	61	24
1	87	24
1	13	25
1	42	25
1	48	25
1	52	25
1	56	25
1	73	25
1	85	25
1	90	25
1	99	25
1	9	26
1	11	26
1	15	26
1	28	26
1	48	26
1	65	26
1	93	26
1	11	27
1	60	27
1	66	27
1	84	27
1	5	28
1	48	28
1	50	28
1	53	28
1	58	28
1	70	28
1	79	28
1	87	28
1	46	29
1	50	29
1	52	29
1	57	29
1	60	29
1	62	29
1	68	29
1	91	29
1	92	29
1	100	29
1	28	30
1	35	30
1	47	30
1	95	30
1	21	31
1	44	31
1	26	32
1	45	32
1	69	32
1	15	33
1	28	33
1	71	33
1	94	33
1	3	34
1	7	34
1	15	34
1	18	34
1	19	34
1	21	34
1	48	34
1	49	34
1	53	34
1	55	34
1	83	34
1	13	35
1	64	35
1	69	35
1	18	36
1	22	36
1	46	36
1	86	36
1	17	37
1	33	37
1	50	37
1	58	37
1	21	38
1	25	38
1	52	38
1	53	38
1	57	38
1	73	38
1	9	39
1	37	39
1	46	39
1	71	39
1	83	39
1	95	39
1	3	41
1	33	41
1	37	41
1	63	41
1	82	41
1	7	42
1	21	42
1	23	42
1	46	42
1	60	42
1	91	42
1	93	42
1	5	43
1	55	43
1	88	43
1	8	44
1	36	44
1	89	44
1	25	45
1	56	45
1	76	45
1	77	45
1	95	45
1	9	46
1	35	46
1	95	46
1	41	47
1	81	47
1	99	47
1	16	48
1	24	48
1	92	48
1	1	49
1	4	49
1	10	49
1	72	49
1	82	49
1	85	49
1	4	50
1	51	50
1	68	50
1	72	50
1	73	50
1	75	50
1	97	50
1	44	51
1	70	51
1	91	51
1	11	52
1	33	52
1	55	52
1	93	52
1	12	53
1	13	53
1	20	53
1	31	53
1	57	53
1	93	53
1	94	53
1	45	54
1	57	54
1	71	54
1	82	54
1	83	54
1	8	55
1	19	55
1	34	55
1	44	55
1	47	55
1	85	55
1	99	55
1	20	56
1	66	56
1	74	56
1	99	56
1	25	57
1	30	57
1	32	57
1	57	57
1	65	57
1	97	57
1	12	58
1	20	58
1	63	58
1	66	58
1	82	58
1	100	58
1	4	59
1	20	59
1	32	59
1	64	59
1	68	59
1	9	60
1	24	60
1	32	60
1	38	60
1	88	60
1	95	60
1	98	60
1	19	61
1	67	61
1	75	61
1	80	61
1	81	61
1	95	61
1	39	62
1	62	62
1	65	62
1	37	63
1	44	63
1	56	63
1	85	63
1	99	63
1	4	64
1	14	64
1	42	64
1	55	64
1	64	64
1	85	64
1	9	65
1	15	65
1	17	65
1	59	65
1	65	65
1	78	65
1	88	65
1	90	65
1	21	66
1	58	66
1	67	66
1	86	66
1	34	67
1	46	67
1	66	67
1	6	68
1	15	68
1	23	68
1	27	68
1	35	68
1	56	68
1	64	68
1	13	69
1	18	69
1	30	69
1	88	69
1	10	70
1	50	70
1	57	70
1	60	70
1	77	70
1	79	70
1	94	70
1	6	71
1	33	71
1	53	71
1	76	71
1	100	71
1	2	72
1	14	72
1	17	72
1	20	72
1	4	73
1	88	73
1	22	74
1	27	74
1	35	74
1	49	74
1	74	74
1	89	74
1	22	75
1	41	75
1	48	75
1	94	75
1	5	76
1	15	76
1	24	76
1	83	76
1	43	77
1	44	77
1	8	78
1	76	78
1	78	78
1	87	78
1	92	78
1	8	79
1	22	79
1	26	79
1	35	79
1	76	79
1	85	79
1	91	79
1	100	79
1	20	80
1	22	80
1	72	80
1	74	80
1	88	80
1	90	80
1	98	80
1	4	81
1	37	81
1	42	81
1	62	81
1	68	81
1	73	81
1	4	82
1	71	82
1	4	83
1	56	83
1	57	83
1	2	84
1	12	84
1	17	84
1	37	84
1	59	84
1	80	84
1	18	85
1	71	85
1	72	85
1	83	85
1	96	85
1	22	86
1	39	86
1	45	86
1	53	86
1	60	86
1	81	86
1	17	87
1	19	87
1	38	87
1	60	87
1	61	87
1	19	88
1	90	88
1	34	89
1	54	89
1	19	90
1	43	90
1	50	90
1	58	90
1	76	90
1	80	90
1	81	90
1	8	91
1	32	91
1	42	91
1	45	91
1	53	91
1	82	91
1	89	91
1	32	92
1	56	92
1	57	92
1	81	92
1	93	92
1	96	92
1	29	93
1	41	93
1	52	93
1	53	93
1	97	93
1	10	94
1	11	94
1	13	94
1	71	94
1	78	94
1	4	95
1	14	95
1	19	95
1	48	95
1	93	95
1	4	96
1	41	96
1	49	96
1	65	96
1	71	96
1	72	96
1	84	96
1	17	97
1	32	97
1	41	97
1	48	97
1	54	97
1	57	97
1	16	98
1	21	98
1	37	98
1	48	98
1	66	98
1	67	98
1	71	98
1	73	98
1	77	98
1	83	98
1	8	99
1	21	99
1	53	99
1	73	99
1	91	99
1	97	99
1	81	100
2	36	1
2	77	1
2	81	1
2	97	1
2	15	2
2	51	2
2	54	2
2	72	2
2	75	2
2	79	2
2	86	2
2	23	3
2	34	3
2	58	3
2	92	3
2	12	4
2	28	4
2	32	4
2	43	4
2	56	4
2	29	5
2	51	5
2	75	5
2	83	5
2	69	6
2	6	7
2	14	7
2	38	7
2	49	7
2	77	7
2	2	8
2	37	8
2	40	8
2	47	8
2	78	8
2	79	8
2	86	8
2	6	9
2	10	9
2	49	9
2	59	9
2	73	9
2	93	9
2	2	10
2	72	10
2	86	10
2	92	10
2	5	11
2	25	11
2	28	11
2	75	11
2	89	11
2	100	11
2	5	12
2	16	12
2	33	12
2	94	12
2	7	13
2	62	13
2	89	13
2	93	13
2	96	13
2	1	14
2	42	14
2	52	14
2	54	14
2	62	14
2	67	14
2	82	14
2	3	15
2	22	15
2	27	15
2	37	15
2	61	15
2	69	15
2	77	15
2	43	16
2	6	17
2	10	17
2	63	17
2	73	17
2	50	18
2	81	18
2	5	19
2	34	19
2	41	19
2	61	19
2	66	19
2	68	19
2	97	19
2	17	20
2	26	20
2	40	20
2	91	20
2	95	20
2	100	20
2	28	21
2	30	21
2	52	21
2	68	21
2	79	21
2	82	21
2	6	22
2	64	22
2	83	22
2	16	23
2	24	23
2	40	23
2	52	23
2	56	23
2	70	23
2	9	24
2	13	24
2	26	24
2	32	24
2	46	24
2	55	24
2	82	24
2	90	24
2	5	25
2	8	25
2	12	25
2	44	25
2	50	25
2	86	25
2	99	25
2	1	26
2	20	26
2	21	26
2	52	26
2	55	26
2	68	26
2	76	26
2	20	27
2	29	27
2	56	27
2	12	28
2	24	28
2	44	28
2	67	28
2	33	29
2	56	29
2	68	29
2	74	29
2	79	29
2	83	29
2	3	30
2	23	30
2	84	30
2	10	31
2	25	31
2	28	31
2	34	31
2	7	32
2	18	32
2	36	32
2	37	32
2	41	32
2	55	32
2	91	32
2	28	33
2	45	33
2	57	33
2	60	33
2	66	33
2	85	33
2	3	34
2	26	34
2	30	34
2	74	34
2	100	34
2	19	35
2	45	35
2	64	35
2	98	35
2	34	36
2	40	36
2	60	36
2	84	36
2	30	37
2	39	37
2	48	37
2	72	37
2	83	37
2	99	37
2	29	38
2	52	38
2	95	38
2	29	39
2	47	39
2	53	39
2	72	39
2	13	40
2	16	40
2	49	40
2	57	40
2	61	40
2	65	40
2	82	40
2	83	40
2	13	41
2	18	41
2	27	41
2	31	41
2	44	41
2	65	41
2	70	41
2	2	42
2	62	42
2	74	42
2	79	42
2	95	42
2	64	43
2	90	43
2	94	43
2	18	44
2	31	44
2	59	44
2	2	45
2	5	45
2	26	45
2	38	45
2	43	45
2	56	45
2	65	45
2	67	45
2	73	45
2	79	45
2	92	45
2	99	45
2	40	46
2	50	46
2	6	47
2	55	47
2	61	47
2	79	47
2	93	47
2	99	47
2	3	48
2	8	48
2	14	48
2	19	48
2	21	48
2	35	48
2	70	48
2	80	48
2	81	48
2	12	49
2	14	49
2	17	49
2	31	49
2	66	49
2	73	49
2	75	49
2	4	50
2	18	50
2	39	50
2	75	50
2	1	51
2	24	51
2	81	51
2	86	51
2	7	52
2	65	52
2	66	52
2	68	52
2	69	52
2	72	52
2	74	52
2	78	52
2	84	52
2	92	52
2	12	53
2	18	53
2	66	53
2	80	53
2	100	53
2	11	55
2	15	55
2	38	55
2	40	55
2	51	55
2	55	55
2	85	55
2	38	56
2	2	57
2	20	57
2	27	57
2	40	57
2	47	57
2	61	57
2	62	57
2	5	58
2	39	59
2	60	59
2	78	59
2	83	59
2	92	59
2	93	59
2	22	60
2	58	60
2	98	60
2	3	61
2	14	61
2	31	61
2	41	61
2	46	61
2	65	61
2	66	61
2	71	61
2	80	61
2	23	62
2	69	62
2	76	62
2	77	62
2	79	62
2	94	62
2	99	62
2	9	63
2	20	63
2	30	63
2	41	63
2	51	63
2	57	63
2	83	63
2	85	63
2	90	63
2	93	63
2	3	64
2	19	64
2	48	64
2	55	64
2	89	64
2	93	64
2	15	65
2	47	65
2	54	65
2	56	65
2	62	65
2	69	65
2	72	65
2	58	66
2	61	66
2	74	66
2	22	67
2	30	67
2	38	67
2	39	67
2	46	67
2	53	67
2	98	67
2	3	68
2	21	68
2	67	68
2	76	68
2	85	68
2	8	69
2	49	69
2	52	69
2	67	69
2	84	69
2	92	69
2	14	70
2	15	70
2	24	70
2	29	70
2	40	70
2	77	70
2	7	71
2	24	71
2	39	71
2	67	71
2	76	71
2	88	71
2	91	71
2	93	71
2	8	72
2	37	72
2	58	72
2	66	72
2	90	72
2	100	72
2	35	73
2	51	73
2	60	73
2	64	73
2	12	74
2	55	74
2	66	74
2	86	74
2	44	75
2	94	75
2	6	76
2	56	76
2	75	76
2	90	77
2	91	77
2	16	78
2	24	78
2	30	78
2	33	78
2	42	78
2	62	78
2	63	78
2	73	78
2	74	78
2	14	79
2	16	79
2	24	79
2	78	79
2	86	79
2	92	79
2	97	79
2	4	80
2	44	80
2	47	80
2	75	80
2	76	80
2	93	80
2	9	81
2	20	81
2	1	82
2	14	82
2	26	82
2	28	82
2	34	82
2	50	82
2	6	83
2	11	83
2	48	84
2	68	84
2	76	84
2	17	85
2	26	85
2	35	85
2	8	86
2	17	86
2	59	86
2	76	86
2	85	86
2	98	86
2	28	87
2	44	87
2	66	87
2	85	87
2	6	88
2	49	88
2	72	88
2	16	89
2	36	89
2	97	89
2	7	90
2	36	90
2	40	90
2	56	90
2	65	90
2	91	90
2	93	90
2	97	90
2	7	91
2	9	91
2	11	91
2	39	91
2	70	91
2	87	91
2	99	91
2	50	92
2	55	92
2	75	92
2	83	92
2	36	93
2	90	93
2	12	94
2	17	94
2	26	94
2	33	94
2	6	95
2	11	95
2	16	95
2	24	95
2	26	95
2	33	95
2	96	95
2	97	95
2	3	96
2	13	96
2	15	96
2	40	96
2	69	96
2	78	96
2	94	96
2	1	97
2	41	97
2	51	97
2	96	97
2	1	98
2	4	98
2	9	98
2	10	98
2	43	98
2	81	98
2	84	98
2	96	98
2	17	99
2	56	99
2	67	99
2	88	99
2	8	100
2	26	100
2	29	100
2	30	100
2	53	100
2	88	100
3	4	1
3	29	1
3	53	1
3	55	1
3	65	1
3	71	1
3	10	2
3	13	2
3	26	2
3	55	2
3	77	2
3	8	3
3	28	3
3	56	3
3	89	3
3	5	4
3	49	4
3	65	4
3	66	4
3	13	5
3	60	5
3	62	5
3	66	5
3	67	5
3	71	5
3	96	5
3	6	6
3	45	6
3	58	6
3	73	6
3	28	7
3	38	7
3	52	7
3	54	7
3	56	7
3	64	7
3	65	7
3	4	8
3	36	8
3	84	8
3	50	9
3	90	9
3	9	10
3	52	10
3	70	10
3	73	10
3	87	10
3	90	10
3	100	10
3	11	11
3	65	11
3	16	12
3	36	12
3	55	12
3	77	12
3	28	13
3	34	13
3	42	13
3	44	13
3	54	13
3	90	13
3	16	14
3	87	14
3	33	15
3	46	15
3	58	15
3	67	15
3	100	15
3	24	16
3	41	16
3	67	16
3	69	16
3	72	16
3	85	16
3	87	16
3	92	16
3	52	17
3	74	17
3	18	18
3	20	18
3	40	18
3	77	18
3	57	19
3	77	19
3	34	20
3	39	20
3	50	20
3	60	20
3	69	20
3	98	20
3	8	21
3	18	21
3	30	21
3	53	21
3	62	21
3	77	21
3	64	22
3	81	22
3	95	22
3	12	23
3	46	23
3	40	24
3	54	24
3	63	24
3	64	24
3	1	25
3	84	25
3	99	25
3	73	26
3	79	26
3	89	26
3	26	27
3	38	27
3	40	27
3	77	27
3	7	28
3	8	28
3	13	28
3	19	28
3	35	28
3	44	28
3	89	28
3	92	28
3	6	29
3	7	29
3	18	29
3	53	29
3	62	29
3	15	30
3	21	30
3	26	30
3	57	30
3	61	30
3	83	30
3	92	30
3	4	31
3	16	31
3	24	31
3	34	31
3	46	31
3	53	31
3	59	31
3	62	31
3	5	32
3	17	32
3	53	32
3	75	32
3	82	32
3	18	33
3	32	33
3	55	33
3	58	33
3	98	33
3	1	34
3	6	34
3	20	34
3	92	35
3	97	35
3	37	36
3	51	36
3	55	36
3	73	36
3	83	36
3	7	37
3	12	37
3	13	37
3	34	37
3	50	37
3	69	37
3	73	37
3	75	37
3	9	38
3	50	38
3	56	38
3	61	38
3	86	38
3	44	39
3	47	39
3	60	39
3	68	39
3	70	39
3	77	39
3	40	40
3	50	40
3	63	40
3	100	40
3	24	41
3	33	41
3	45	41
3	69	41
3	84	41
3	95	41
3	25	42
3	31	42
3	32	42
3	34	42
3	39	42
3	70	42
3	80	42
3	94	42
3	95	42
3	30	43
3	85	43
3	95	43
3	16	44
3	40	44
3	9	45
3	21	45
3	24	45
3	49	45
3	55	45
3	87	45
3	90	45
3	5	46
3	67	46
3	72	46
3	92	46
3	7	47
3	34	47
3	65	47
3	88	47
3	93	47
3	46	48
3	47	48
3	61	48
3	70	48
3	90	48
3	17	49
3	27	49
3	29	49
3	59	49
3	78	49
3	88	49
3	4	50
3	27	50
3	57	50
3	66	50
3	68	50
3	76	50
3	85	50
3	92	50
3	26	51
3	36	51
3	59	51
3	88	52
3	91	52
3	94	52
3	3	53
3	14	53
3	18	53
3	69	53
3	87	53
3	20	54
3	44	54
3	18	55
3	40	55
3	58	55
3	72	55
3	98	55
3	11	56
3	17	56
3	24	56
3	46	56
3	62	56
3	64	56
3	25	57
3	27	57
3	78	57
3	80	57
3	100	57
3	59	58
3	1	59
3	3	59
3	50	59
3	94	59
3	11	60
3	15	60
3	16	60
3	21	60
3	28	60
3	66	60
3	77	60
3	95	60
3	1	61
3	17	61
3	51	61
3	53	61
3	75	61
3	79	61
3	95	61
3	10	62
3	51	62
3	18	63
3	55	63
3	76	63
3	77	63
3	9	64
3	44	64
3	50	64
3	61	64
3	29	65
3	32	65
3	51	65
3	63	65
3	69	65
3	74	65
3	78	65
3	87	65
3	8	66
3	25	66
3	30	66
3	57	66
3	79	66
3	81	66
3	94	66
3	6	67
3	29	67
3	33	67
3	52	67
3	63	67
3	73	67
3	99	67
3	27	68
3	34	68
3	40	68
3	57	68
3	70	68
3	80	68
3	14	69
3	19	69
3	27	69
3	85	69
3	2	70
3	6	70
3	18	70
3	78	70
3	84	70
3	94	70
3	26	71
3	56	71
3	91	71
3	93	71
3	100	71
3	81	72
3	84	72
3	3	74
3	4	74
3	35	74
3	2	75
3	26	75
3	67	75
3	1	76
3	46	76
3	74	76
3	76	76
3	82	76
3	84	76
3	5	77
3	24	77
3	27	77
3	32	77
3	44	77
3	45	77
3	71	77
3	99	77
3	24	78
3	25	78
3	43	79
3	54	79
3	77	79
3	93	79
3	19	80
3	46	80
3	52	80
3	60	80
3	82	80
3	93	80
3	98	80
3	3	81
3	15	81
3	30	81
3	51	81
3	86	81
3	5	82
3	33	82
3	44	82
3	99	82
3	26	83
3	100	83
3	47	84
3	85	84
3	86	84
3	87	84
3	89	84
3	9	85
3	34	85
3	65	85
3	67	85
3	73	85
3	28	86
3	41	86
3	46	86
3	55	86
3	62	86
3	98	86
3	23	87
3	25	87
3	58	87
3	64	87
3	75	87
3	98	87
3	36	88
3	44	88
3	52	88
3	86	88
3	87	88
3	5	89
3	20	89
3	27	89
3	25	90
3	31	90
3	68	90
3	74	90
3	84	90
3	87	90
3	100	90
3	30	91
3	39	91
3	84	91
3	85	91
3	87	91
3	92	91
3	6	92
3	10	92
3	24	92
3	12	93
3	20	93
3	50	93
3	60	93
3	77	93
3	79	93
3	83	93
3	91	93
3	14	94
3	33	94
3	49	94
3	63	94
3	66	94
3	4	95
3	66	95
3	70	95
3	93	95
3	96	95
3	3	96
3	20	96
3	22	96
3	31	96
3	41	96
3	64	96
3	99	96
3	6	97
3	14	97
3	36	97
3	59	97
3	84	97
3	89	97
3	12	98
3	17	98
3	29	98
3	40	98
3	70	98
3	72	98
3	3	99
3	6	99
3	12	99
3	31	99
3	62	99
3	67	99
3	84	99
3	99	99
3	8	100
3	15	100
3	57	100
3	81	100

## Sheet: Sheet3
1	18	1
1	56	1
1	98	1
1	11	2
1	17	2
1	42	2
1	72	2
1	76	2
1	83	2
1	5	3
1	19	3
1	22	3
1	42	3
1	48	3
1	50	3
1	53	3
1	94	3
1	5	4
1	31	4
1	69	4
1	73	4
1	93	4
1	22	5
1	23	5
1	59	5
1	78	5
1	81	5
1	89	5
1	20	6
1	49	6
1	63	6
1	72	6
1	17	7
1	19	7
1	30	7
1	42	7
1	45	7
1	61	7
1	71	7
1	73	7
1	85	7
1	14	8
1	35	8
1	48	8
1	62	8
1	85	8
1	90	8
1	69	9
1	83	9
1	27	10
1	11	11
1	41	11
1	51	11
1	57	11
1	95	11
1	40	12
1	53	12
1	63	12
1	16	13
1	47	13
1	52	13
1	58	13
1	93	13
1	7	14
1	21	14
1	45	14
1	88	14
1	89	14
1	5	15
1	55	15
1	75	15
1	79	15
1	80	15
1	84	15
1	87	15
1	100	15
1	29	16
1	32	16
1	2	17
1	27	17
1	53	17
1	64	17
1	67	17
1	36	18
1	45	18
1	77	18
1	95	18
1	96	18
1	36	19
1	73	19
1	87	19
1	97	19
1	10	20
1	50	20
1	55	20
1	82	20
1	86	20
1	11	21
1	27	21
1	39	21
1	57	21
1	59	21
1	98	21
1	91	22
1	30	23
1	34	23
1	58	23
1	65	23
1	82	23
1	19	24
1	77	24
1	86	24
1	12	25
1	51	25
1	77	25
1	4	26
1	85	26
1	87	26
1	96	26
1	6	27
1	47	27
1	48	27
1	62	27
1	96	27
1	7	28
1	23	28
1	67	28
1	75	28
1	97	28
1	7	29
1	19	29
1	40	29
1	91	29
1	52	30
1	95	30
1	36	31
1	70	31
1	19	32
1	31	32
1	47	32
1	58	32
1	66	32
1	2	33
1	3	33
1	25	33
1	28	33
1	93	33
1	70	34
1	92	34
1	96	34
1	7	35
1	31	35
1	35	35
1	56	35
1	63	35
1	5	36
1	7	36
1	36	36
1	60	36
1	81	36
1	91	36
1	94	36
1	2	37
1	15	37
1	66	37
1	30	38
1	49	38
1	74	38
1	85	38
1	91	38
1	12	39
1	39	39
1	66	39
1	67	39
1	69	39
1	1	40
1	37	40
1	38	40
1	57	40
1	62	40
1	83	40
1	94	40
1	33	41
1	36	41
1	37	41
1	57	41
1	89	41
1	98	41
1	38	42
1	46	42
1	56	42
1	62	42
1	10	43
1	61	43
1	80	43
1	84	43
1	13	44
1	27	44
1	3	45
1	6	45
1	35	45
1	68	45
1	79	45
1	20	46
1	33	46
1	47	46
1	58	46
1	61	46
1	94	46
1	6	47
1	18	47
1	47	47
1	53	47
1	61	47
1	10	48
1	21	48
1	60	48
1	85	48
1	99	48
1	1	49
1	16	49
1	44	49
1	48	49
1	73	49
1	80	49
1	8	50
1	25	50
1	37	50
1	17	51
1	60	51
1	63	51
1	97	51
1	33	52
1	50	52
1	51	52
1	63	52
1	81	52
1	83	52
1	92	52
1	6	53
1	34	53
1	44	53
1	50	53
1	51	53
1	8	54
1	9	54
1	30	54
1	31	54
1	44	54
1	59	54
1	63	54
1	72	54
1	94	54
1	6	55
1	38	55
1	75	55
1	85	55
1	45	56
1	66	56
1	73	56
1	86	56
1	14	57
1	39	57
1	43	57
1	59	57
1	67	57
1	83	57
1	17	58
1	39	58
1	62	58
1	87	58
1	91	58
1	96	58
1	11	59
1	40	59
1	43	59
1	79	59
1	100	59
1	22	60
1	24	60
1	37	60
1	40	60
1	76	60
1	97	60
1	8	61
1	20	61
1	49	61
1	66	61
1	78	61
1	22	62
1	30	62
1	33	62
1	36	62
1	48	62
1	49	62
1	69	62
1	76	62
1	87	62
1	92	62
1	16	63
1	26	63
1	42	63
1	7	64
1	28	64
1	45	64
1	66	64
1	78	64
1	8	65
1	38	65
1	72	65
1	91	65
1	13	66
1	37	66
1	61	66
1	86	66
1	23	67
1	24	67
1	46	67
1	56	67
1	60	67
1	84	67
1	87	67
1	21	68
1	22	68
1	23	68
1	43	68
1	58	68
1	63	68
1	71	68
1	95	68
1	18	69
1	41	69
1	49	69
1	53	69
1	94	69
1	95	69
1	2	70
1	12	70
1	21	70
1	22	70
1	52	70
1	99	70
1	3	71
1	34	71
1	44	71
1	57	71
1	69	71
1	19	72
1	24	72
1	40	72
1	15	73
1	28	73
1	33	73
1	88	73
1	25	74
1	26	74
1	51	74
1	55	74
1	63	74
1	82	74
1	89	74
1	11	75
1	51	75
1	70	75
1	76	75
1	77	75
1	88	75
1	4	76
1	12	76
1	29	76
1	30	76
1	35	76
1	50	76
1	12	77
1	31	77
1	73	77
1	93	77
1	19	78
1	56	78
1	67	78
1	74	78
1	7	79
1	57	79
1	71	79
1	73	79
1	83	79
1	91	79
1	98	79
1	25	80
1	34	81
1	57	81
1	93	81
1	31	82
1	37	82
1	92	82
1	21	83
1	25	83
1	44	83
1	73	83
1	6	84
1	9	84
1	29	84
1	33	84
1	52	84
1	71	84
1	75	84
1	99	84
1	10	85
1	13	85
1	26	85
1	45	85
1	93	85
1	1	86
1	8	86
1	57	86
1	76	86
1	82	86
1	88	86
1	25	87
1	94	87
1	99	87
1	11	88
1	45	88
1	7	89
1	37	89
1	77	89
1	94	89
1	27	90
1	49	90
1	17	91
1	43	91
1	56	91
1	89	91
1	32	92
1	33	92
1	61	92
1	81	92
1	1	93
1	19	93
1	44	93
1	70	93
1	31	94
1	43	94
1	46	94
1	53	94
1	58	94
1	10	95
1	46	95
1	72	95
1	76	95
1	81	95
1	95	95
1	96	95
1	11	96
1	21	96
1	22	96
1	43	96
1	55	96
1	67	96
1	73	96
1	94	96
1	9	97
1	12	97
1	13	97
1	26	97
1	66	97
1	81	97
1	10	98
1	11	98
1	31	98
1	39	98
1	86	98
1	5	99
1	8	99
1	51	99
1	54	99
1	57	99
1	11	100
1	12	100
1	25	100
1	27	100
1	49	100
1	54	100
1	70	100
1	100	100
2	10	1
2	30	1
2	39	1
2	46	1
2	65	1
2	79	1
2	80	1
2	2	2
2	18	2
2	22	2
2	32	2
2	91	2
2	5	3
2	47	3
2	48	3
2	49	3
2	88	3
2	26	4
2	72	4
2	76	4
2	41	5
2	52	5
2	61	5
2	91	5
2	32	6
2	40	6
2	54	6
2	59	6
2	60	6
2	84	6
2	14	7
2	49	7
2	93	7
2	42	8
2	82	8
2	93	8
2	98	8
2	6	9
2	10	9
2	57	9
2	6	10
2	7	10
2	24	10
2	36	10
2	65	10
2	66	10
2	67	10
2	71	10
2	79	10
2	85	10
2	100	10
2	13	11
2	20	11
2	21	11
2	36	11
2	44	11
2	70	11
2	90	11
2	91	11
2	38	12
2	58	12
2	62	12
2	74	12
2	88	12
2	92	12
2	46	13
2	52	13
2	56	13
2	58	13
2	3	14
2	8	14
2	42	14
2	78	14
2	84	14
2	100	14
2	55	15
2	64	15
2	32	16
2	40	16
2	41	16
2	75	16
2	95	16
2	100	16
2	10	17
2	61	17
2	69	17
2	78	17
2	94	17
2	97	17
2	22	18
2	25	18
2	48	18
2	57	18
2	60	18
2	70	18
2	86	18
2	96	18
2	9	19
2	25	19
2	78	19
2	86	19
2	16	20
2	24	20
2	26	20
2	29	20
2	33	20
2	73	20
2	75	20
2	76	20
2	3	21
2	22	21
2	36	21
2	57	21
2	73	21
2	85	21
2	100	21
2	9	22
2	21	22
2	47	22
2	66	22
2	88	22
2	35	23
2	37	23
2	43	23
2	45	23
2	48	23
2	15	24
2	27	24
2	24	25
2	70	25
2	22	26
2	40	26
2	91	26
2	92	26
2	5	27
2	40	27
2	45	27
2	52	27
2	78	27
2	95	27
2	27	28
2	37	28
2	67	28
2	89	28
2	92	28
2	22	29
2	54	29
2	80	29
2	1	30
2	24	30
2	27	30
2	76	30
2	77	30
2	80	30
2	100	30
2	15	31
2	21	31
2	64	31
2	68	31
2	70	31
2	87	31
2	92	31
2	7	32
2	9	32
2	5	33
2	51	33
2	62	33
2	76	33
2	81	33
2	83	33
2	34	34
2	53	34
2	64	34
2	67	34
2	91	34
2	22	35
2	59	35
2	63	35
2	69	35
2	8	36
2	22	36
2	25	36
2	34	36
2	52	36
2	65	36
2	77	36
2	98	36
2	8	37
2	15	37
2	24	37
2	99	37
2	4	38
2	82	38
2	98	38
2	58	39
2	63	39
2	78	39
2	39	40
2	62	40
2	81	40
2	89	40
2	100	40
2	11	41
2	34	41
2	56	41
2	75	42
2	77	42
2	85	42
2	88	42
2	39	43
2	53	43
2	81	43
2	95	43
2	16	44
2	24	44
2	29	44
2	45	44
2	55	44
2	92	44
2	65	45
2	82	45
2	84	45
2	33	46
2	96	46
2	6	47
2	30	47
2	72	47
2	94	47
2	36	48
2	93	48
2	99	48
2	2	49
2	23	49
2	28	49
2	29	49
2	30	49
2	56	49
2	64	49
2	66	49
2	84	49
2	87	49
2	97	49
2	10	50
2	22	50
2	60	50
2	61	50
2	78	50
2	2	51
2	10	51
2	16	51
2	23	51
2	24	51
2	34	51
2	37	51
2	60	51
2	71	51
2	92	51
2	98	51
2	31	52
2	45	52
2	50	52
2	74	52
2	84	52
2	85	52
2	9	53
2	13	53
2	17	53
2	22	53
2	23	53
2	60	53
2	87	53
2	99	53
2	69	54
2	79	54
2	80	54
2	90	54
2	98	54
2	11	55
2	12	55
2	31	55
2	33	55
2	45	55
2	47	55
2	57	55
2	60	55
2	61	55
2	64	55
2	76	55
2	77	55
2	90	55
2	4	56
2	60	56
2	1	57
2	4	57
2	92	57
2	46	58
2	51	58
2	66	58
2	79	58
2	4	59
2	20	59
2	27	59
2	29	59
2	55	59
2	84	59
2	11	60
2	13	60
2	35	60
2	38	60
2	55	60
2	86	60
2	8	61
2	17	61
2	50	61
2	66	61
2	84	61
2	33	62
2	34	62
2	51	62
2	52	62
2	54	62
2	67	62
2	85	62
2	91	62
2	6	63
2	16	63
2	26	63
2	51	63
2	57	63
2	84	63
2	86	63
2	9	64
2	10	64
2	30	64
2	46	64
2	70	64
2	88	64
2	24	65
2	39	65
2	52	65
2	92	65
2	1	66
2	17	66
2	22	66
2	39	66
2	48	66
2	65	66
2	16	67
2	55	67
2	66	67
2	75	67
2	6	68
2	9	68
2	12	68
2	36	68
2	69	68
2	2	69
2	39	69
2	52	69
2	57	69
2	61	69
2	11	70
2	27	70
2	31	70
2	45	70
2	48	70
2	54	70
2	65	70
2	66	70
2	79	70
2	80	70
2	81	70
2	97	70
2	42	71
2	94	71
2	100	71
2	6	72
2	23	72
2	29	72
2	30	72
2	41	72
2	58	72
2	61	72
2	67	72
2	10	73
2	11	73
2	23	73
2	35	73
2	39	73
2	60	73
2	20	74
2	32	75
2	88	75
2	8	76
2	21	76
2	62	76
2	70	76
2	80	76
2	89	76
2	92	76
2	26	77
2	28	77
2	57	77
2	63	77
2	68	77
2	75	77
2	86	77
2	90	77
2	4	78
2	8	78
2	12	78
2	26	78
2	32	78
2	40	78
2	42	78
2	49	78
2	59	78
2	77	78
2	20	79
2	34	79
2	62	79
2	82	79
2	98	79
2	22	80
2	43	80
2	51	80
2	70	80
2	74	80
2	77	80
2	81	80
2	16	81
2	46	81
2	3	82
2	17	82
2	99	82
2	3	83
2	6	83
2	13	83
2	37	83
2	68	83
2	69	83
2	80	83
2	93	83
2	30	84
2	31	84
2	35	84
2	36	84
2	71	84
2	8	85
2	21	85
2	34	85
2	55	85
2	83	85
2	90	85
2	42	86
2	48	86
2	84	86
2	3	87
2	17	87
2	20	87
2	23	87
2	24	87
2	84	87
2	9	88
2	25	88
2	86	88
2	3	89
2	14	89
2	19	89
2	23	89
2	59	89
2	69	89
2	76	89
2	86	89
2	95	89
2	19	90
2	23	90
2	27	90
2	28	90
2	46	90
2	67	90
2	5	91
2	35	91
2	52	91
2	55	91
2	57	91
2	64	91
2	67	91
2	69	91
2	72	91
2	84	91
2	93	91
2	96	91
2	99	91
2	33	92
2	60	92
2	77	92
2	84	92
2	43	93
2	60	93
2	91	93
2	97	93
2	52	94
2	53	94
2	58	94
2	6	95
2	47	95
2	52	95
2	66	95
2	70	95
2	74	95
2	75	95
2	81	95
2	24	96
2	47	96
2	62	96
2	98	96
2	26	97
2	47	97
2	48	97
2	55	97
2	4	98
2	24	98
2	26	98
2	39	98
2	54	98
2	56	98
2	81	98
2	97	98
2	20	99
2	22	99
2	37	99
2	38	99
2	43	99
2	55	99
2	94	99
2	22	100
2	25	100
2	26	100
2	59	100
2	69	100
2	81	100
2	85	100
3	6	1
3	41	1
3	48	1
3	92	1
3	17	2
3	25	2
3	58	2
3	79	2
3	81	2
3	82	2
3	5	3
3	10	3
3	31	3
3	47	3
3	54	3
3	55	3
3	2	4
3	19	4
3	78	4
3	96	4
3	99	4
3	26	5
3	31	5
3	53	5
3	58	5
3	7	6
3	31	6
3	34	6
3	98	6
3	13	7
3	15	7
3	91	7
3	13	8
3	24	8
3	59	8
3	62	8
3	89	8
3	5	9
3	31	9
3	61	9
3	74	9
3	79	9
3	87	9
3	100	9
3	17	10
3	42	10
3	48	10
3	51	10
3	75	10
3	84	10
3	3	11
3	37	11
3	59	11
3	93	11
3	8	12
3	19	12
3	35	12
3	43	12
3	12	13
3	16	13
3	22	13
3	1	14
3	40	14
3	61	14
3	62	14
3	74	14
3	18	15
3	44	15
3	52	15
3	81	15
3	93	15
3	100	15
3	7	16
3	9	16
3	17	16
3	41	16
3	50	16
3	59	16
3	62	16
3	66	16
3	5	17
3	6	17
3	7	17
3	16	17
3	35	17
3	55	17
3	72	17
3	82	17
3	96	17
3	99	17
3	20	18
3	28	18
3	42	18
3	46	18
3	82	18
3	88	18
3	28	19
3	57	19
3	70	19
3	79	19
3	86	19
3	3	20
3	22	20
3	30	20
3	40	20
3	46	20
3	18	21
3	56	21
3	19	22
3	29	22
3	41	22
3	51	22
3	59	22
3	70	22
3	76	22
3	10	23
3	17	23
3	32	23
3	43	23
3	72	23
3	1	24
3	30	24
3	44	24
3	66	24
3	73	24
3	74	24
3	93	24
3	46	25
3	51	25
3	61	25
3	21	26
3	25	26
3	36	27
3	51	27
3	72	27
3	6	28
3	37	28
3	53	28
3	71	28
3	75	28
3	76	28
3	77	28
3	60	29
3	3	30
3	22	30
3	32	30
3	66	30
3	100	30
3	1	31
3	13	31
3	30	31
3	33	31
3	36	31
3	63	31
3	71	31
3	4	32
3	73	32
3	77	32
3	18	33
3	54	33
3	100	33
3	8	34
3	9	34
3	15	34
3	89	34
3	91	34
3	8	35
3	15	35
3	30	35
3	35	35
3	68	35
3	20	36
3	9	37
3	40	37
3	27	38
3	45	38
3	49	38
3	64	38
3	82	38
3	23	39
3	40	39
3	91	39
3	98	39
3	28	40
3	47	40
3	51	40
3	77	40
3	94	40
3	96	40
3	22	41
3	27	41
3	41	41
3	48	41
3	58	41
3	72	41
3	77	41
3	26	42
3	50	42
3	81	42
3	85	42
3	17	43
3	18	43
3	22	43
3	24	43
3	28	43
3	34	43
3	6	44
3	27	44
3	71	44
3	75	44
3	52	45
3	86	45
3	29	46
3	58	46
3	36	47
3	53	47
3	54	47
3	88	47
3	91	47
3	95	47
3	4	48
3	7	48
3	25	48
3	35	48
3	97	48
3	99	48
3	1	49
3	30	49
3	45	49
3	60	49
3	61	49
3	64	49
3	87	49
3	99	49
3	5	50
3	14	50
3	30	50
3	33	50
3	80	50
3	93	50
3	99	50
3	17	51
3	20	51
3	76	51
3	100	51
3	52	52
3	58	52
3	59	52
3	62	52
3	11	53
3	25	53
3	31	53
3	33	53
3	41	53
3	59	53
3	60	53
3	70	53
3	97	53
3	4	54
3	11	54
3	23	54
3	33	54
3	39	54
3	56	54
3	70	54
3	77	54
3	7	55
3	5	56
3	11	56
3	24	56
3	40	56
3	95	56
3	2	57
3	18	57
3	71	57
3	9	58
3	31	58
3	34	58
3	77	58
3	12	59
3	21	59
3	30	59
3	40	59
3	59	59
3	69	59
3	85	59
3	91	59
3	49	60
3	78	60
3	99	60
3	30	61
3	32	61
3	39	61
3	46	61
3	84	61
3	96	61
3	4	62
3	20	62
3	45	62
3	72	62
3	79	62
3	63	63
3	69	63
3	89	63
3	90	63
3	8	64
3	49	64
3	50	64
3	67	64
3	77	64
3	6	65
3	13	65
3	16	65
3	18	65
3	51	65
3	53	65
3	76	65
3	1	66
3	17	66
3	65	66
3	96	66
3	12	67
3	60	67
3	93	67
3	94	67
3	30	68
3	38	68
3	71	68
3	58	70
3	95	70
3	37	71
3	40	71
3	66	71
3	88	71
3	91	71
3	3	72
3	34	72
3	66	72
3	24	73
3	46	73
3	74	73
3	81	73
3	86	73
3	40	74
3	77	74
3	97	74
3	4	76
3	50	76
3	71	76
3	92	76
3	1	77
3	7	77
3	70	77
3	74	77
3	95	77
3	41	78
3	50	78
3	53	78
3	66	78
3	68	78
3	78	78
3	99	78
3	22	79
3	25	79
3	26	79
3	30	79
3	53	79
3	20	80
3	52	80
3	66	80
3	13	81
3	33	81
3	53	81
3	71	81
3	19	82
3	35	82
3	40	82
3	92	82
3	14	83
3	44	83
3	72	83
3	81	83
3	94	83
3	95	83
3	28	84
3	37	84
3	50	84
3	96	84
3	98	84
3	2	85
3	39	85
3	62	85
3	82	85
3	87	85
3	5	86
3	12	86
3	13	86
3	73	86
3	28	87
3	48	87
3	52	87
3	63	87
3	91	87
3	96	87
3	97	87
3	98	87
3	99	87
3	4	88
3	22	88
3	24	88
3	39	88
3	48	88
3	80	88
3	89	88
3	18	89
3	46	89
3	79	89
3	80	89
3	82	89
3	90	89
3	100	89
3	32	90
3	70	90
3	53	91
3	70	91
3	72	91
3	83	91
3	5	92
3	6	92
3	28	92
3	42	92
3	98	92
3	39	93
3	57	93
3	14	94
3	20	94
3	29	94
3	30	94
3	67	94
3	69	94
3	89	94
3	91	94
3	22	95
3	32	95
3	44	95
3	73	95
3	76	95
3	95	95
3	15	96
3	46	96
3	74	96
3	85	96
3	18	97
3	40	97
3	83	97
3	7	98
3	53	98
3	63	98
3	76	98
3	92	98
3	21	99
3	41	99
3	49	99
3	55	99
3	68	99
3	91	99
3	32	100
3	34	100
3	36	100
3	57	100
3	86	100

## Sheet: Sheet4
1	53	1
1	11	2
1	21	2
1	37	3
1	47	3
1	59	3
1	82	3
1	39	4
1	52	4
1	7	5
1	18	5
1	49	5
1	7	6
1	16	6
1	77	6
1	19	7
1	31	7
1	45	7
1	49	7
1	60	7
1	85	7
1	2	8
1	37	8
1	54	8
1	61	8
1	66	9
1	70	9
1	99	9
1	14	10
1	37	10
1	39	10
1	43	10
1	17	11
1	33	11
1	90	11
1	96	11
1	17	12
1	48	12
1	57	12
1	71	12
1	99	12
1	12	13
1	71	13
1	78	13
1	95	13
1	98	13
1	12	14
1	17	14
1	52	14
1	67	14
1	75	14
1	27	15
1	58	15
1	5	16
1	17	16
1	24	16
1	42	16
1	67	16
1	69	16
1	76	16
1	1	17
1	13	17
1	18	17
1	29	17
1	60	17
1	96	17
1	8	18
1	10	18
1	74	18
1	66	19
1	67	19
1	80	19
1	82	19
1	28	20
1	42	20
1	59	20
1	68	20
1	73	20
1	84	20
1	17	21
1	44	21
1	85	21
1	14	22
1	23	22
1	7	23
1	27	23
1	56	23
1	68	23
1	91	23
1	46	24
1	52	24
1	58	24
1	59	24
1	90	24
1	91	24
1	11	25
1	17	25
1	39	25
1	52	25
1	81	25
1	90	25
1	59	26
1	68	26
1	77	26
1	80	26
1	87	26
1	89	26
1	17	27
1	86	27
1	44	28
1	71	28
1	84	28
1	89	28
1	97	28
1	1	29
1	14	29
1	22	29
1	45	29
1	65	29
1	66	29
1	75	29
1	85	29
1	89	29
1	58	30
1	88	30
1	1	31
1	37	31
1	44	31
1	68	31
1	95	31
1	7	32
1	14	32
1	48	32
1	88	32
1	52	33
1	53	33
1	82	33
1	90	33
1	2	34
1	11	34
1	31	34
1	39	34
1	58	34
1	61	34
1	95	34
1	28	35
1	34	35
1	44	35
1	46	35
1	47	35
1	54	35
1	56	35
1	60	35
1	64	35
1	83	35
1	84	35
1	92	35
1	25	36
1	42	36
1	66	36
1	70	36
1	76	36
1	97	36
1	98	36
1	1	37
1	67	37
1	97	37
1	98	37
1	8	38
1	10	38
1	20	38
1	25	38
1	29	38
1	37	38
1	54	38
1	55	38
1	91	38
1	10	39
1	13	39
1	28	39
1	44	39
1	90	39
1	55	40
1	66	40
1	73	40
1	91	41
1	9	42
1	20	42
1	43	42
1	49	42
1	59	42
1	82	42
1	96	42
1	9	43
1	45	43
1	63	43
1	64	43
1	73	43
1	90	43
1	28	44
1	35	44
1	47	44
1	51	44
1	98	44
1	5	45
1	41	45
1	58	45
1	64	45
1	77	45
1	93	45
1	99	45
1	3	46
1	16	46
1	29	46
1	50	46
1	62	46
1	63	46
1	89	46
1	13	47
1	57	47
1	72	47
1	100	47
1	42	48
1	44	48
1	52	48
1	54	48
1	55	48
1	56	48
1	65	48
1	95	48
1	2	49
1	4	49
1	87	49
1	4	50
1	12	50
1	26	50
1	30	50
1	36	50
1	48	50
1	55	50
1	59	50
1	70	50
1	84	50
1	35	51
1	46	52
1	53	52
1	77	52
1	12	53
1	15	53
1	19	53
1	67	53
1	68	53
1	81	53
1	94	53
1	97	53
1	93	54
1	7	55
1	56	55
1	62	55
1	74	55
1	76	55
1	85	55
1	92	55
1	1	56
1	8	56
1	43	56
1	55	56
1	66	56
1	77	56
1	8	57
1	26	57
1	49	57
1	69	57
1	78	57
1	88	57
1	16	58
1	20	58
1	21	58
1	31	58
1	35	58
1	61	58
1	72	58
1	82	58
1	93	58
1	5	59
1	19	59
1	26	59
1	57	59
1	59	59
1	72	59
1	77	59
1	96	59
1	18	60
1	50	60
1	85	60
1	99	60
1	5	61
1	25	61
1	36	61
1	43	61
1	65	61
1	72	61
1	91	61
1	10	62
1	53	62
1	22	63
1	44	63
1	81	63
1	90	63
1	94	63
1	5	64
1	89	64
1	7	65
1	48	65
1	84	65
1	7	66
1	73	66
1	79	66
1	93	66
1	8	67
1	17	67
1	53	67
1	76	67
1	77	67
1	17	68
1	24	68
1	42	68
1	48	68
1	53	68
1	3	69
1	16	69
1	23	69
1	52	69
1	64	69
1	80	69
1	97	69
1	16	70
1	17	70
1	65	70
1	67	70
1	80	70
1	88	70
1	99	70
1	6	71
1	17	71
1	24	71
1	35	71
1	45	71
1	77	71
1	79	71
1	3	72
1	21	72
1	56	72
1	21	73
1	37	73
1	17	74
1	47	74
1	59	74
1	25	75
1	49	75
1	58	75
1	81	75
1	97	75
1	41	76
1	47	76
1	51	76
1	74	76
1	84	76
1	25	77
1	45	77
1	49	77
1	58	77
1	92	77
1	4	78
1	14	78
1	30	78
1	95	78
1	6	79
1	9	79
1	16	79
1	20	79
1	26	79
1	46	79
1	55	79
1	87	79
1	5	80
1	31	80
1	41	80
1	72	80
1	84	80
1	41	81
1	45	81
1	57	81
1	63	81
1	69	81
1	81	81
1	96	81
1	53	82
1	59	82
1	63	82
1	86	82
1	51	83
1	62	83
1	68	83
1	96	83
1	99	83
1	38	84
1	42	84
1	48	84
1	52	84
1	70	84
1	11	85
1	15	85
1	3	86
1	36	86
1	70	86
1	73	86
1	80	86
1	29	87
1	47	87
1	62	87
1	74	87
1	76	87
1	3	88
1	10	88
1	86	88
1	53	89
1	81	89
1	98	89
1	47	90
1	89	90
1	19	91
1	99	91
1	27	92
1	60	92
1	83	92
1	85	92
1	36	93
1	94	93
1	95	93
1	31	94
1	51	94
1	52	94
1	64	94
1	87	94
1	93	94
1	6	95
1	24	95
1	42	95
1	55	95
1	57	95
1	69	95
1	9	96
1	59	96
1	77	96
1	1	97
1	39	97
1	61	97
1	62	97
1	63	97
1	70	97
1	87	97
1	5	98
1	12	98
1	52	98
1	81	98
1	84	98
1	93	98
1	23	99
1	30	99
1	33	99
1	60	99
1	63	99
1	79	99
1	93	99
1	24	100
1	63	100
2	72	1
2	100	1
2	13	2
2	32	2
2	49	2
2	61	2
2	66	2
2	86	2
2	12	3
2	27	3
2	31	3
2	33	3
2	39	3
2	47	3
2	76	3
2	93	3
2	98	3
2	1	4
2	19	4
2	26	4
2	38	4
2	3	5
2	11	5
2	14	5
2	53	5
2	84	5
2	88	5
2	98	5
2	44	6
2	94	6
2	95	6
2	26	7
2	35	7
2	52	7
2	85	7
2	12	8
2	64	8
2	98	8
2	27	9
2	34	9
2	74	9
2	11	10
2	29	10
2	93	10
2	29	11
2	43	11
2	56	11
2	74	11
2	13	12
2	27	12
2	39	12
2	48	12
2	55	12
2	69	12
2	75	12
2	79	12
2	22	13
2	31	13
2	37	13
2	52	13
2	53	13
2	70	13
2	79	13
2	9	14
2	29	14
2	40	14
2	50	14
2	53	14
2	56	14
2	66	14
2	70	14
2	74	14
2	82	14
2	20	15
2	25	15
2	28	15
2	57	15
2	59	15
2	98	15
2	2	16
2	4	16
2	15	16
2	28	16
2	29	16
2	38	16
2	43	16
2	45	16
2	89	16
2	91	16
2	11	17
2	16	17
2	23	17
2	32	17
2	50	17
2	78	17
2	85	17
2	10	18
2	15	18
2	48	18
2	18	19
2	43	19
2	90	19
2	92	19
2	95	19
2	5	20
2	17	20
2	37	20
2	52	20
2	70	20
2	80	20
2	98	20
2	100	20
2	19	21
2	36	21
2	40	21
2	41	21
2	76	21
2	34	22
2	51	22
2	56	22
2	14	23
2	53	23
2	58	23
2	98	23
2	67	24
2	74	24
2	79	24
2	11	25
2	61	25
2	70	25
2	79	25
2	23	26
2	50	26
2	78	26
2	79	26
2	17	27
2	40	27
2	63	27
2	2	28
2	4	28
2	5	28
2	6	28
2	9	28
2	11	28
2	18	28
2	48	28
2	98	28
2	99	28
2	48	29
2	71	29
2	91	29
2	92	29
2	97	29
2	99	29
2	4	30
2	44	30
2	54	30
2	77	30
2	17	31
2	25	31
2	36	31
2	51	31
2	75	31
2	98	31
2	4	32
2	12	32
2	32	32
2	36	32
2	65	32
2	41	33
2	83	33
2	85	33
2	97	33
2	29	34
2	48	34
2	71	34
2	75	34
2	15	35
2	29	35
2	35	35
2	56	35
2	70	35
2	83	35
2	91	35
2	41	36
2	48	36
2	76	36
2	82	36
2	85	36
2	1	37
2	11	37
2	34	37
2	47	37
2	50	37
2	53	37
2	64	37
2	82	37
2	92	37
2	93	37
2	16	38
2	19	38
2	38	38
2	39	38
2	51	38
2	58	38
2	60	38
2	73	38
2	3	39
2	62	39
2	21	40
2	45	40
2	76	40
2	94	40
2	30	41
2	31	41
2	47	41
2	94	41
2	26	42
2	46	42
2	48	42
2	61	42
2	68	42
2	78	42
2	85	42
2	21	43
2	36	43
2	37	43
2	44	43
2	59	43
2	61	43
2	83	43
2	97	43
2	28	44
2	51	44
2	55	44
2	67	44
2	68	44
2	76	44
2	100	44
2	58	45
2	3	46
2	4	46
2	17	46
2	30	46
2	87	46
2	41	47
2	77	47
2	20	48
2	27	48
2	78	48
2	84	48
2	98	48
2	31	49
2	36	49
2	69	49
2	71	49
2	75	49
2	95	49
2	11	50
2	18	50
2	20	50
2	23	50
2	41	50
2	49	50
2	51	50
2	62	50
2	69	50
2	91	50
2	96	50
2	2	51
2	12	51
2	31	51
2	8	52
2	13	52
2	23	52
2	26	52
2	43	52
2	56	52
2	73	52
2	2	53
2	6	53
2	33	53
2	35	53
2	36	53
2	53	53
2	88	53
2	6	54
2	14	54
2	16	54
2	48	54
2	50	54
2	100	54
2	25	55
2	32	55
2	39	55
2	55	55
2	9	56
2	62	56
2	83	56
2	18	57
2	25	57
2	62	57
2	72	57
2	90	57
2	1	58
2	3	58
2	5	58
2	36	58
2	40	58
2	73	59
2	88	59
2	93	59
2	8	60
2	61	60
2	78	60
2	94	60
2	11	61
2	25	61
2	38	61
2	7	62
2	58	62
2	84	62
2	91	62
2	19	63
2	37	63
2	39	63
2	44	63
2	70	63
2	79	63
2	4	64
2	8	64
2	22	64
2	24	64
2	36	64
2	42	64
2	43	64
2	45	64
2	75	64
2	78	64
2	86	64
2	38	65
2	99	65
2	71	66
2	88	66
2	5	67
2	7	67
2	8	67
2	35	67
2	52	67
2	53	67
2	93	67
2	95	67
2	44	68
2	67	68
2	81	68
2	96	68
2	29	69
2	37	69
2	38	69
2	49	69
2	50	69
2	51	69
2	58	69
2	59	69
2	73	69
2	84	69
2	6	70
2	20	70
2	65	70
2	79	70
2	94	70
2	13	71
2	15	71
2	21	71
2	32	71
2	41	71
2	80	71
2	93	71
2	51	72
2	69	72
2	74	72
2	75	72
2	80	72
2	81	72
2	86	72
2	7	73
2	13	73
2	67	73
2	9	74
2	12	74
2	29	74
2	41	74
2	33	75
2	84	75
2	93	75
2	96	75
2	7	76
2	19	76
2	30	76
2	53	76
2	17	77
2	18	77
2	33	77
2	48	77
2	53	77
2	70	77
2	91	77
2	7	78
2	22	78
2	44	78
2	78	78
2	87	78
2	88	78
2	93	78
2	1	79
2	18	79
2	56	79
2	82	79
2	95	79
2	16	80
2	35	80
2	44	80
2	57	80
2	66	80
2	68	80
2	78	80
2	97	80
2	6	81
2	11	81
2	24	81
2	43	81
2	72	81
2	74	81
2	82	81
2	68	82
2	87	82
2	97	82
2	22	83
2	33	83
2	47	83
2	60	83
2	61	84
2	8	85
2	16	85
2	34	85
2	60	85
2	84	85
2	87	85
2	98	85
2	7	86
2	13	86
2	31	86
2	39	86
2	41	86
2	72	86
2	84	86
2	6	87
2	16	87
2	30	87
2	31	87
2	54	87
2	62	87
2	27	88
2	2	89
2	77	89
2	44	90
2	95	90
2	45	91
2	62	91
2	83	91
2	11	92
2	12	92
2	30	92
2	35	92
2	56	92
2	15	93
2	30	93
2	40	93
2	45	93
2	53	93
2	79	93
2	9	94
2	16	94
2	26	94
2	66	94
2	1	95
2	2	95
2	18	95
2	21	95
2	22	95
2	31	95
2	76	95
2	93	95
2	70	96
2	75	96
2	98	96
2	5	97
2	20	97
2	63	97
2	70	97
2	89	97
2	36	98
2	67	98
2	85	98
2	86	98
2	87	98
2	91	98
2	94	98
2	98	98
2	38	99
2	77	99
2	86	99
2	6	100
2	40	100
2	57	100
2	97	100
3	17	1
3	29	1
3	32	1
3	33	1
3	42	1
3	63	1
3	67	1
3	16	2
3	23	2
3	30	2
3	35	2
3	41	2
3	43	2
3	51	2
3	53	2
3	59	2
3	93	2
3	18	3
3	21	3
3	26	3
3	43	3
3	65	3
3	92	3
3	31	4
3	34	4
3	42	4
3	54	4
3	65	4
3	70	4
3	72	4
3	93	4
3	12	5
3	27	5
3	96	5
3	4	6
3	13	6
3	58	6
3	84	6
3	10	7
3	25	7
3	39	7
3	43	7
3	59	7
3	94	7
3	19	8
3	29	8
3	35	8
3	80	8
3	48	9
3	57	9
3	85	9
3	92	9
3	6	10
3	14	10
3	29	10
3	39	10
3	40	10
3	41	10
3	42	10
3	43	10
3	44	10
3	59	10
3	61	10
3	86	10
3	23	11
3	41	11
3	61	11
3	66	11
3	71	11
3	29	12
3	31	12
3	33	12
3	41	12
3	65	12
3	81	12
3	90	12
3	48	13
3	55	13
3	57	13
3	68	13
3	70	13
3	7	14
3	9	14
3	23	14
3	37	14
3	57	14
3	92	14
3	5	15
3	11	15
3	30	15
3	43	15
3	69	15
3	96	15
3	98	15
3	41	16
3	65	16
3	77	16
3	14	17
3	16	17
3	20	17
3	32	17
3	34	17
3	46	17
3	84	17
3	5	18
3	11	18
3	63	18
3	77	18
3	6	19
3	30	19
3	44	19
3	47	19
3	89	19
3	9	20
3	35	20
3	41	20
3	81	20
3	96	20
3	15	21
3	21	21
3	25	21
3	38	21
3	69	21
3	70	21
3	78	21
3	23	22
3	59	22
3	71	22
3	97	22
3	98	22
3	26	23
3	76	23
3	77	23
3	83	23
3	98	23
3	5	24
3	10	24
3	21	24
3	38	24
3	42	24
3	88	24
3	18	25
3	53	25
3	62	25
3	68	25
3	75	25
3	80	25
3	24	26
3	28	26
3	32	26
3	45	26
3	52	26
3	64	26
3	75	26
3	90	26
3	94	26
3	7	27
3	31	27
3	70	27
3	82	27
3	98	27
3	1	28
3	4	28
3	5	28
3	13	28
3	14	28
3	17	28
3	32	28
3	45	28
3	86	28
3	97	28
3	62	29
3	15	30
3	17	30
3	31	30
3	56	30
3	76	30
3	85	30
3	87	30
3	93	30
3	2	31
3	5	31
3	11	31
3	29	31
3	45	31
3	49	31
3	69	31
3	73	31
3	77	31
3	82	31
3	87	31
3	93	31
3	13	32
3	17	32
3	58	32
3	99	32
3	12	33
3	19	33
3	24	33
3	39	33
3	43	33
3	47	33
3	65	33
3	76	33
3	80	33
3	96	33
3	29	34
3	61	34
3	6	35
3	70	35
3	100	35
3	17	36
3	20	36
3	27	36
3	34	36
3	39	36
3	41	36
3	49	36
3	68	36
3	74	36
3	79	36
3	81	36
3	89	36
3	36	37
3	40	37
3	61	37
3	68	37
3	82	37
3	3	38
3	11	38
3	38	38
3	49	38
3	66	38
3	69	38
3	75	38
3	81	38
3	83	38
3	5	39
3	13	39
3	51	39
3	65	39
3	71	39
3	83	39
3	20	40
3	42	40
3	50	40
3	58	40
3	75	40
3	81	40
3	13	41
3	79	41
3	8	42
3	50	42
3	70	42
3	79	42
3	95	42
3	35	43
3	37	43
3	57	43
3	68	43
3	72	43
3	80	43
3	82	43
3	88	43
3	16	44
3	24	44
3	43	44
3	56	44
3	57	44
3	60	44
3	64	44
3	77	44
3	82	44
3	26	45
3	2	46
3	12	46
3	52	46
3	69	46
3	84	46
3	86	46
3	88	46
3	23	47
3	30	47
3	44	47
3	54	47
3	81	47
3	88	47
3	95	47
3	13	48
3	17	48
3	25	48
3	39	48
3	69	48
3	84	48
3	93	48
3	27	49
3	46	49
3	64	49
3	68	49
3	77	49
3	99	49
3	38	50
3	44	50
3	49	50
3	73	50
3	84	50
3	27	51
3	29	51
3	51	51
3	68	51
3	42	52
3	44	52
3	50	52
3	54	52
3	61	52
3	82	52
3	86	52
3	65	53
3	90	53
3	2	54
3	6	54
3	35	54
3	42	54
3	46	54
3	61	54
3	99	54
3	4	55
3	27	55
3	38	55
3	55	55
3	62	55
3	87	55
3	13	56
3	21	56
3	38	56
3	66	56
3	88	56
3	95	56
3	30	57
3	48	57
3	58	57
3	64	57
3	96	57
3	10	58
3	17	58
3	36	58
3	53	58
3	56	58
3	90	58
3	94	58
3	21	59
3	34	59
3	35	59
3	58	59
3	1	60
3	9	60
3	27	60
3	33	60
3	48	60
3	61	60
3	81	60
3	95	60
3	83	61
3	88	61
3	20	62
3	26	62
3	75	62
3	82	62
3	97	62
3	98	62
3	3	63
3	5	63
3	27	63
3	27	64
3	36	64
3	52	64
3	54	64
3	90	64
3	4	65
3	15	65
3	22	65
3	38	65
3	13	66
3	18	66
3	44	66
3	50	66
3	61	66
3	85	66
3	92	66
3	100	66
3	39	67
3	55	67
3	99	67
3	3	68
3	14	68
3	70	68
3	90	68
3	97	68
3	49	69
3	80	69
3	18	70
3	20	70
3	51	70
3	62	70
3	85	70
3	98	70
3	67	71
3	74	71
3	86	71
3	97	71
3	26	72
3	37	72
3	54	72
3	66	72
3	7	73
3	29	73
3	57	73
3	72	73
3	81	73
3	15	74
3	19	74
3	30	74
3	37	74
3	33	75
3	50	75
3	67	75
3	91	75
3	2	76
3	4	76
3	25	76
3	56	76
3	64	76
3	84	76
3	91	76
3	5	77
3	37	77
3	51	77
3	68	77
3	87	77
3	12	78
3	13	78
3	33	78
3	41	78
3	55	78
3	57	78
3	76	78
3	79	78
3	30	79
3	47	79
3	49	79
3	71	79
3	99	79
3	35	80
3	46	80
3	55	80
3	58	80
3	29	81
3	45	81
3	66	81
3	74	81
3	79	81
3	84	81
3	96	81
3	4	82
3	18	82
3	39	82
3	58	82
3	80	82
3	84	82
3	85	82
3	93	82
3	2	83
3	27	83
3	58	83
3	70	83
3	82	83
3	8	84
3	26	84
3	33	84
3	39	84
3	42	84
3	57	84
3	72	84
3	14	85
3	34	85
3	70	85
3	75	85
3	87	85
3	92	85
3	26	86
3	59	86
3	77	86
3	81	86
3	91	86
3	7	87
3	19	87
3	39	87
3	51	87
3	52	87
3	63	87
3	41	88
3	82	88
3	93	88
3	15	89
3	19	89
3	35	89
3	56	89
3	84	89
3	36	90
3	37	90
3	40	90
3	49	90
3	56	90
3	78	90
3	83	90
3	86	90
3	2	91
3	40	91
3	48	91
3	2	92
3	8	92
3	16	92
3	27	92
3	28	92
3	89	92
3	23	93
3	26	93
3	36	93
3	51	93
3	54	93
3	63	93
3	86	93
3	93	93
3	99	93
3	21	94
3	57	94
3	70	94
3	92	94
3	95	94
3	58	95
3	63	95
3	93	95
3	100	95
3	32	96
3	36	96
3	53	96
3	84	96
3	8	97
3	12	97
3	14	97
3	17	97
3	25	97
3	46	97
3	10	98
3	34	98
3	80	98
3	93	98
3	3	99
3	45	99
3	53	99
3	59	99
3	70	99
3	75	99
3	77	99
3	31	100
3	32	100
3	33	100
3	52	100
3	59	100
3	76	100
3	80	100
3	95	100

## Sheet: Sheet5
1	47	1
1	61	1
1	63	1
1	69	1
1	4	2
1	11	2
1	25	2
1	81	2
1	94	2
1	97	2
1	8	3
1	14	3
1	20	3
1	46	3
1	59	3
1	95	3
1	97	3
1	98	3
1	99	3
1	100	3
1	79	4
1	15	5
1	42	5
1	46	5
1	80	5
1	1	6
1	31	6
1	46	6
1	60	6
1	100	6
1	8	7
1	13	7
1	44	7
1	54	7
1	75	7
1	82	7
1	37	8
1	66	8
1	78	8
1	17	9
1	22	9
1	26	9
1	27	9
1	32	9
1	33	9
1	62	9
1	25	10
1	26	10
1	69	10
1	71	10
1	80	10
1	90	10
1	1	11
1	2	11
1	9	11
1	30	11
1	35	11
1	37	11
1	50	11
1	58	11
1	59	11
1	2	12
1	9	12
1	10	12
1	11	12
1	50	12
1	53	12
1	66	12
1	9	13
1	22	13
1	26	13
1	37	13
1	55	13
1	58	13
1	4	14
1	19	14
1	35	14
1	49	14
1	60	14
1	92	14
1	27	15
1	37	15
1	13	16
1	15	16
1	18	16
1	30	16
1	1	17
1	20	17
1	68	17
1	69	17
1	71	17
1	72	17
1	79	17
1	8	18
1	23	18
1	6	19
1	19	19
1	40	19
1	15	20
1	21	20
1	33	20
1	54	20
1	73	20
1	3	21
1	16	21
1	76	21
1	14	22
1	16	22
1	21	22
1	69	22
1	83	22
1	14	23
1	25	23
1	26	23
1	39	23
1	40	23
1	42	23
1	95	23
1	97	23
1	31	24
1	77	24
1	89	24
1	100	24
1	9	25
1	59	25
1	85	25
1	91	25
1	13	26
1	29	26
1	30	26
1	34	26
1	55	26
1	90	26
1	3	27
1	22	27
1	82	27
1	98	27
1	13	28
1	37	28
1	98	28
1	99	28
1	75	29
1	80	29
1	90	29
1	19	30
1	20	30
1	30	30
1	38	30
1	55	30
1	75	30
1	78	30
1	12	31
1	21	31
1	27	31
1	43	31
1	49	31
1	68	31
1	70	31
1	72	31
1	83	31
1	85	31
1	11	32
1	40	32
1	65	32
1	88	32
1	91	32
1	94	32
1	1	33
1	16	33
1	23	33
1	37	33
1	52	33
1	59	33
1	62	33
1	71	33
1	90	33
1	40	34
1	42	34
1	44	34
1	66	34
1	87	34
1	91	34
1	92	34
1	50	35
1	9	36
1	10	36
1	43	36
1	71	36
1	76	36
1	92	36
1	5	37
1	87	37
1	8	38
1	13	38
1	16	38
1	88	38
1	28	39
1	33	39
1	77	39
1	3	40
1	31	40
1	48	40
1	19	41
1	58	41
1	91	41
1	93	41
1	96	41
1	5	42
1	10	42
1	22	42
1	43	42
1	54	42
1	75	42
1	87	42
1	98	42
1	17	43
1	20	43
1	43	43
1	62	43
1	67	43
1	79	43
1	96	43
1	66	44
1	68	44
1	23	45
1	83	45
1	95	45
1	6	46
1	11	46
1	16	46
1	17	46
1	38	46
1	76	46
1	8	47
1	20	47
1	21	47
1	33	47
1	44	47
1	79	47
1	17	48
1	26	48
1	51	48
1	58	48
1	64	48
1	17	49
1	37	49
1	39	49
1	44	49
1	45	49
1	49	49
1	37	50
1	56	50
1	63	50
1	69	50
1	80	50
1	83	50
1	97	50
1	6	51
1	22	51
1	78	51
1	86	51
1	88	51
1	99	51
1	47	52
1	75	52
1	93	52
1	11	53
1	29	53
1	74	53
1	5	54
1	50	54
1	56	54
1	74	54
1	27	56
1	33	56
1	61	56
1	77	56
1	91	56
1	2	57
1	9	57
1	30	57
1	46	57
1	2	58
1	38	58
1	74	58
1	36	59
1	50	59
1	93	59
1	96	59
1	16	60
1	22	60
1	70	60
1	96	60
1	14	61
1	16	61
1	38	61
1	47	61
1	52	61
1	77	61
1	82	61
1	50	62
1	71	62
1	82	62
1	1	63
1	23	63
1	40	63
1	51	63
1	68	63
1	72	63
1	84	63
1	1	64
1	4	64
1	14	64
1	33	64
1	49	64
1	90	64
1	92	64
1	19	65
1	37	65
1	44	65
1	49	65
1	63	65
1	71	65
1	12	66
1	48	66
1	72	66
1	6	67
1	26	67
1	58	67
1	63	67
1	65	67
1	95	67
1	97	67
1	85	68
1	16	69
1	21	69
1	26	69
1	29	69
1	74	69
1	81	69
1	94	69
1	99	69
1	4	70
1	6	70
1	20	70
1	33	70
1	54	70
1	88	70
1	15	71
1	18	71
1	96	71
1	19	72
1	50	72
1	64	72
1	39	73
1	58	73
1	69	73
1	78	73
1	90	73
1	1	74
1	12	74
1	37	74
1	43	74
1	57	74
1	58	74
1	69	74
1	33	75
1	56	75
1	76	75
1	23	76
1	30	76
1	51	76
1	73	76
1	91	76
1	5	77
1	91	77
1	95	77
1	97	77
1	7	79
1	25	79
1	56	79
1	60	79
1	87	79
1	89	79
1	95	79
1	23	80
1	37	80
1	49	80
1	87	80
1	88	80
1	91	80
1	7	81
1	9	81
1	20	81
1	49	81
1	51	81
1	39	82
1	72	82
1	90	82
1	4	83
1	19	83
1	33	83
1	73	83
1	84	83
1	88	83
1	90	83
1	12	84
1	30	84
1	36	84
1	40	84
1	42	84
1	68	84
1	17	85
1	79	85
1	38	86
1	44	86
1	46	86
1	67	86
1	72	86
1	83	86
1	91	86
1	7	87
1	34	87
1	38	87
1	48	87
1	9	88
1	78	88
1	90	88
1	93	88
1	15	89
1	16	89
1	40	89
1	72	89
1	73	89
1	97	89
1	44	90
1	54	90
1	90	90
1	94	90
1	13	91
1	22	91
1	63	91
1	79	91
1	92	91
1	4	92
1	12	92
1	28	92
1	51	92
1	58	92
1	65	92
1	72	92
1	13	93
1	16	93
1	44	93
1	50	93
1	54	93
1	69	93
1	72	93
1	73	93
1	36	94
1	54	94
1	55	94
1	61	94
1	21	95
1	25	95
1	53	95
1	93	95
1	99	95
1	1	96
1	9	96
1	13	96
1	41	96
1	7	97
1	24	97
1	29	98
1	46	98
1	78	98
1	9	99
1	26	99
1	25	100
1	33	100
1	49	100
1	52	100
1	62	100
1	70	100
1	98	100
2	20	1
2	31	1
2	36	1
2	94	1
2	12	2
2	49	2
2	58	2
2	74	2
2	80	2
2	88	2
2	20	3
2	25	3
2	49	3
2	63	3
2	72	3
2	27	4
2	43	4
2	75	4
2	84	4
2	93	4
2	6	5
2	8	5
2	21	5
2	74	5
2	93	5
2	2	6
2	99	6
2	86	7
2	95	7
2	97	7
2	8	8
2	53	8
2	81	8
2	91	8
2	97	8
2	28	9
2	29	9
2	30	9
2	31	9
2	57	9
2	6	10
2	18	10
2	60	10
2	74	10
2	77	10
2	100	10
2	16	11
2	23	11
2	35	11
2	38	11
2	69	11
2	77	11
2	94	11
2	10	12
2	22	12
2	34	12
2	45	12
2	54	12
2	68	12
2	79	12
2	88	12
2	5	13
2	32	13
2	45	13
2	50	13
2	71	13
2	97	13
2	3	14
2	42	14
2	44	14
2	66	14
2	91	14
2	1	15
2	10	15
2	13	15
2	16	15
2	50	15
2	64	15
2	89	15
2	100	15
2	22	16
2	32	16
2	87	16
2	94	16
2	2	17
2	5	17
2	24	17
2	79	17
2	88	17
2	95	17
2	2	18
2	9	18
2	26	18
2	81	18
2	16	19
2	44	19
2	68	19
2	70	19
2	90	19
2	94	19
2	95	19
2	38	20
2	58	20
2	76	20
2	92	20
2	93	20
2	7	21
2	9	21
2	30	21
2	40	21
2	84	21
2	14	22
2	53	22
2	72	22
2	78	22
2	80	22
2	4	23
2	10	23
2	23	23
2	26	23
2	39	23
2	43	23
2	33	24
2	43	24
2	45	24
2	47	24
2	49	24
2	56	24
2	60	24
2	64	24
2	70	24
2	75	24
2	84	24
2	92	24
2	28	25
2	5	26
2	6	26
2	18	26
2	57	26
2	80	26
2	1	27
2	4	27
2	8	27
2	24	27
2	25	27
2	50	27
2	58	27
2	98	27
2	2	28
2	18	28
2	33	28
2	62	28
2	19	29
2	39	29
2	58	29
2	95	29
2	24	31
2	32	31
2	55	31
2	67	31
2	100	31
2	22	32
2	34	32
2	59	32
2	63	32
2	68	32
2	87	32
2	3	33
2	4	33
2	27	33
2	31	33
2	32	33
2	33	33
2	90	33
2	92	33
2	27	34
2	49	34
2	57	34
2	99	34
2	8	35
2	12	35
2	20	35
2	41	35
2	48	35
2	54	35
2	95	35
2	3	36
2	36	36
2	71	36
2	98	36
2	30	37
2	34	37
2	93	37
2	2	38
2	15	38
2	17	38
2	23	38
2	44	38
2	68	38
2	76	38
2	85	38
2	95	38
2	37	39
2	57	39
2	84	39
2	86	39
2	8	40
2	19	40
2	26	40
2	58	40
2	92	40
2	20	41
2	34	41
2	40	41
2	81	41
2	89	41
2	92	41
2	97	41
2	23	42
2	28	42
2	33	42
2	65	42
2	66	42
2	93	42
2	94	42
2	100	42
2	3	43
2	33	43
2	34	43
2	70	43
2	74	43
2	82	43
2	7	44
2	10	44
2	24	44
2	44	44
2	96	44
2	6	45
2	20	45
2	24	45
2	44	45
2	62	45
2	95	45
2	97	45
2	99	45
2	14	46
2	40	46
2	55	46
2	4	47
2	55	47
2	56	47
2	75	47
2	79	47
2	91	47
2	100	47
2	26	48
2	34	48
2	46	48
2	85	48
2	100	48
2	43	49
2	29	50
2	56	50
2	24	51
2	36	51
2	42	51
2	55	51
2	89	51
2	99	51
2	3	52
2	11	52
2	38	52
2	96	52
2	1	53
2	47	53
2	70	53
2	3	54
2	12	54
2	14	54
2	27	54
2	51	54
2	80	54
2	5	55
2	9	55
2	12	55
2	46	55
2	76	55
2	77	55
2	82	55
2	89	55
2	6	56
2	9	56
2	32	56
2	50	56
2	62	56
2	94	57
2	4	58
2	11	58
2	14	58
2	34	58
2	36	58
2	92	58
2	27	59
2	89	59
2	92	59
2	95	59
2	97	59
2	19	60
2	30	60
2	67	60
2	70	60
2	7	61
2	55	61
2	84	61
2	85	61
2	13	62
2	18	62
2	21	62
2	45	62
2	48	62
2	99	62
2	13	63
2	17	63
2	51	63
2	90	63
2	7	64
2	20	64
2	78	64
2	83	64
2	87	64
2	89	64
2	6	65
2	36	65
2	48	65
2	50	65
2	75	65
2	89	65
2	25	66
2	51	66
2	64	66
2	66	66
2	74	66
2	100	66
2	17	67
2	25	67
2	28	67
2	52	67
2	55	67
2	61	67
2	89	67
2	90	67
2	12	68
2	30	68
2	31	68
2	38	68
2	40	68
2	43	68
2	48	68
2	55	68
2	61	68
2	80	68
2	91	68
2	19	69
2	1	70
2	17	70
2	22	70
2	40	70
2	45	70
2	55	70
2	57	70
2	80	70
2	84	70
2	95	70
2	99	70
2	15	71
2	27	71
2	45	71
2	61	71
2	72	71
2	8	72
2	51	72
2	70	72
2	76	72
2	30	73
2	60	73
2	70	73
2	76	73
2	69	74
2	83	74
2	34	75
2	65	75
2	66	75
2	72	75
2	98	75
2	31	76
2	61	76
2	62	76
2	74	76
2	47	77
2	75	77
2	76	77
2	10	78
2	43	78
2	48	78
2	77	78
2	6	79
2	72	79
2	73	79
2	74	79
2	75	79
2	82	79
2	96	79
2	90	80
2	31	81
2	48	81
2	53	81
2	91	81
2	1	82
2	29	82
2	81	82
2	29	83
2	57	83
2	62	83
2	63	83
2	86	83
2	14	84
2	23	84
2	66	84
2	83	84
2	5	85
2	7	85
2	38	85
2	68	85
2	70	85
2	97	85
2	3	86
2	4	86
2	19	86
2	23	86
2	28	86
2	43	86
2	26	87
2	39	87
2	50	87
2	50	88
2	93	88
2	36	89
2	3	90
2	22	90
2	89	90
2	22	91
2	32	91
2	33	91
2	62	91
2	79	91
2	3	92
2	10	92
2	81	92
2	20	93
2	26	93
2	32	93
2	37	93
2	61	93
2	67	93
2	96	93
2	4	94
2	13	94
2	36	94
2	89	94
2	33	95
2	56	95
2	68	95
2	82	95
2	15	96
2	60	96
2	92	96
2	1	97
2	8	97
2	36	97
2	46	97
2	64	97
2	75	97
2	94	97
2	10	98
2	23	98
2	39	98
2	63	98
2	73	98
2	79	98
2	94	98
2	9	99
2	12	99
2	18	99
2	38	99
2	43	99
2	51	99
2	73	99
2	8	100
2	48	100
2	78	100
2	84	100
3	58	1
3	70	1
3	78	1
3	1	2
3	11	2
3	22	2
3	26	2
3	62	2
3	68	2
3	79	2
3	85	2
3	97	2
3	100	2
3	65	3
3	86	3
3	1	4
3	10	4
3	22	4
3	47	4
3	70	4
3	35	5
3	52	5
3	63	5
3	72	5
3	75	5
3	93	5
3	28	6
3	29	6
3	34	6
3	56	6
3	21	7
3	34	7
3	41	7
3	61	7
3	24	8
3	36	8
3	76	8
3	10	9
3	14	9
3	71	9
3	61	10
3	5	11
3	66	11
3	69	11
3	88	11
3	16	12
3	85	12
3	19	13
3	25	13
3	40	13
3	44	13
3	52	13
3	54	13
3	60	13
3	70	13
3	1	14
3	27	14
3	38	14
3	61	14
3	98	14
3	36	15
3	40	16
3	45	16
3	57	16
3	70	16
3	18	17
3	45	17
3	96	17
3	2	18
3	4	18
3	65	18
3	68	18
3	94	18
3	95	18
3	37	19
3	6	20
3	47	20
3	54	20
3	61	20
3	2	21
3	19	21
3	34	21
3	43	21
3	55	21
3	56	21
3	96	21
3	13	22
3	18	22
3	26	22
3	30	22
3	31	22
3	51	22
3	65	22
3	86	22
3	5	23
3	46	23
3	75	23
3	79	23
3	10	24
3	49	24
3	62	24
3	89	24
3	94	24
3	10	25
3	34	25
3	53	25
3	75	25
3	1	26
3	74	26
3	86	26
3	9	27
3	32	27
3	71	27
3	73	27
3	77	27
3	81	27
3	32	28
3	46	28
3	49	28
3	61	28
3	69	28
3	85	28
3	12	29
3	35	29
3	81	29
3	98	29
3	1	30
3	29	30
3	36	30
3	40	30
3	41	30
3	52	30
3	69	30
3	96	30
3	4	31
3	20	31
3	28	31
3	45	31
3	51	31
3	52	31
3	61	31
3	65	31
3	86	31
3	12	32
3	18	32
3	33	32
3	58	32
3	92	32
3	93	32
3	12	33
3	33	33
3	87	33
3	88	33
3	95	33
3	6	34
3	31	34
3	32	34
3	39	34
3	97	34
3	100	34
3	4	35
3	16	35
3	21	35
3	29	35
3	96	35
3	5	36
3	8	36
3	15	36
3	20	36
3	28	36
3	40	36
3	60	36
3	81	36
3	10	37
3	73	37
3	8	38
3	16	38
3	33	38
3	36	38
3	52	38
3	60	39
3	74	39
3	80	39
3	4	41
3	13	41
3	75	41
3	92	41
3	96	41
3	11	42
3	21	42
3	47	42
3	50	42
3	90	42
3	91	42
3	3	43
3	6	43
3	33	43
3	52	43
3	61	43
3	63	43
3	75	43
3	80	43
3	86	43
3	88	43
3	98	43
3	4	44
3	24	44
3	27	44
3	28	44
3	64	44
3	87	44
3	99	44
3	19	45
3	30	45
3	36	45
3	50	45
3	67	45
3	69	45
3	77	45
3	82	45
3	41	46
3	71	46
3	8	47
3	21	47
3	49	47
3	12	48
3	26	48
3	32	48
3	89	48
3	65	49
3	68	49
3	9	50
3	87	50
3	95	50
3	99	50
3	5	51
3	26	51
3	28	51
3	64	51
3	86	51
3	90	51
3	91	51
3	10	52
3	51	52
3	73	52
3	86	52
3	95	52
3	24	53
3	76	53
3	89	53
3	13	54
3	53	54
3	60	54
3	73	54
3	76	54
3	89	54
3	13	55
3	43	55
3	85	55
3	88	55
3	89	55
3	18	56
3	19	56
3	51	56
3	21	57
3	28	57
3	55	57
3	57	57
3	67	57
3	73	57
3	15	58
3	20	58
3	32	58
3	47	58
3	50	58
3	61	58
3	82	58
3	34	59
3	39	59
3	70	59
3	99	59
3	25	60
3	44	60
3	58	60
3	79	60
3	82	60
3	91	61
3	6	62
3	19	62
3	20	62
3	62	62
3	1	63
3	2	63
3	79	63
3	11	64
3	28	64
3	50	64
3	70	64
3	73	64
3	86	64
3	96	64
3	34	65
3	76	65
3	80	65
3	21	66
3	23	66
3	35	66
3	40	66
3	61	66
3	7	67
3	21	67
3	26	67
3	44	67
3	99	67
3	8	68
3	54	68
3	9	69
3	25	69
3	28	69
3	72	69
3	77	69
3	34	70
3	35	70
3	36	70
3	51	70
3	89	70
3	93	70
3	5	71
3	44	71
3	82	71
3	20	72
3	40	72
3	74	72
3	88	72
3	99	72
3	3	73
3	44	73
3	47	73
3	93	73
3	100	73
3	13	74
3	57	74
3	66	74
3	89	74
3	100	74
3	37	75
3	62	75
3	100	75
3	29	76
3	45	76
3	62	76
3	63	76
3	86	76
3	91	76
3	96	76
3	43	77
3	85	77
3	100	77
3	2	78
3	29	78
3	54	78
3	80	78
3	63	79
3	73	79
3	21	80
3	25	80
3	56	80
3	63	80
3	72	80
3	87	80
3	6	81
3	10	81
3	90	81
3	14	82
3	17	82
3	48	82
3	94	82
3	25	83
3	89	83
3	97	83
3	13	84
3	20	84
3	25	84
3	31	84
3	72	84
3	89	84
3	99	84
3	30	85
3	44	85
3	54	86
3	65	86
3	67	86
3	80	86
3	84	86
3	17	87
3	22	87
3	31	87
3	33	87
3	74	87
3	79	87
3	97	87
3	29	88
3	33	88
3	45	88
3	5	89
3	20	89
3	32	89
3	43	89
3	72	89
3	87	89
3	91	89
3	7	90
3	18	90
3	36	90
3	43	90
3	94	90
3	96	90
3	14	91
3	20	91
3	33	91
3	48	91
3	85	91
3	89	91
3	49	92
3	56	92
3	70	92
3	88	92
3	46	93
3	61	93
3	78	93
3	90	93
3	91	93
3	16	94
3	35	94
3	41	94
3	53	94
3	63	94
3	75	94
3	12	95
3	15	95
3	16	95
3	50	95
3	78	95
3	98	95
3	36	96
3	6	97
3	33	97
3	35	97
3	53	97
3	69	97
3	93	97
3	16	98
3	26	98
3	62	98
3	77	99
3	3	100
3	18	100
3	41	100
3	65	100
3	73	100
3	83	100
3	92	100

## Sheet: Sheet6
1	19	1
1	88	1
1	95	1
1	12	2
1	25	2
1	55	2
1	56	2
1	11	3
1	70	3
1	74	3
1	90	3
1	94	3
1	39	4
1	48	4
1	58	4
1	60	4
1	83	4
1	87	4
1	8	5
1	20	5
1	36	5
1	82	5
1	18	6
1	22	6
1	64	6
1	10	7
1	14	7
1	59	7
1	68	7
1	73	7
1	9	8
1	25	8
1	75	8
1	79	8
1	84	8
1	37	9
1	50	9
1	52	9
1	53	9
1	59	9
1	82	9
1	91	9
1	95	9
1	52	10
1	76	10
1	86	10
1	2	11
1	18	11
1	37	11
1	4	12
1	28	12
1	87	12
1	89	12
1	49	13
1	77	13
1	85	13
1	7	14
1	24	14
1	59	14
1	68	14
1	12	15
1	26	15
1	39	15
1	45	15
1	48	15
1	89	15
1	100	15
1	8	16
1	10	16
1	15	16
1	88	16
1	93	16
1	48	17
1	55	17
1	57	17
1	79	17
1	16	18
1	56	18
1	57	18
1	80	18
1	81	18
1	99	18
1	4	19
1	13	19
1	18	19
1	33	19
1	39	19
1	41	19
1	43	19
1	62	19
1	78	19
1	82	19
1	96	19
1	97	19
1	1	20
1	11	20
1	33	20
1	63	20
1	79	20
1	80	20
1	89	20
1	21	21
1	35	21
1	53	21
1	54	21
1	33	22
1	40	22
1	45	22
1	54	22
1	65	22
1	88	22
1	23	23
1	65	23
1	79	23
1	5	24
1	15	24
1	21	24
1	32	24
1	63	24
1	97	24
1	19	25
1	31	25
1	87	25
1	2	26
1	14	26
1	61	26
1	79	26
1	81	26
1	3	27
1	24	27
1	27	27
1	36	27
1	45	27
1	50	27
1	60	27
1	64	27
1	71	27
1	94	27
1	29	28
1	40	28
1	45	28
1	59	28
1	97	28
1	98	28
1	99	28
1	19	29
1	20	29
1	59	29
1	60	29
1	17	30
1	97	30
1	2	31
1	19	31
1	65	31
1	17	32
1	18	32
1	19	32
1	20	32
1	23	32
1	51	32
1	70	32
1	71	32
1	97	32
1	23	33
1	27	33
1	57	33
1	68	33
1	3	34
1	35	34
1	37	34
1	61	34
1	73	34
1	82	34
1	14	35
1	33	35
1	84	35
1	90	35
1	22	36
1	45	36
1	48	36
1	55	36
1	74	36
1	90	36
1	94	36
1	2	37
1	8	37
1	16	37
1	19	37
1	34	37
1	45	37
1	49	37
1	50	37
1	59	37
1	85	37
1	18	38
1	23	38
1	36	38
1	42	38
1	64	38
1	71	38
1	89	38
1	26	39
1	51	39
1	69	39
1	86	39
1	3	40
1	5	40
1	43	40
1	65	40
1	95	40
1	99	40
1	6	41
1	25	41
1	49	41
1	64	41
1	27	42
1	29	42
1	31	42
1	64	42
1	80	42
1	19	43
1	26	43
1	58	43
1	61	43
1	75	43
1	78	43
1	94	43
1	51	44
1	58	44
1	74	44
1	6	45
1	45	45
1	65	45
1	91	45
1	35	46
1	44	46
1	53	46
1	75	46
1	93	46
1	19	47
1	23	47
1	25	47
1	40	47
1	54	47
1	59	47
1	75	47
1	84	47
1	98	48
1	99	48
1	37	49
1	53	49
1	66	49
1	77	49
1	81	49
1	94	49
1	25	50
1	47	51
1	72	51
1	79	51
1	5	52
1	33	52
1	34	52
1	47	52
1	54	52
1	66	52
1	93	52
1	5	53
1	28	53
1	58	53
1	63	53
1	64	53
1	89	53
1	17	54
1	29	54
1	30	54
1	35	54
1	36	54
1	49	54
1	75	54
1	96	54
1	15	55
1	16	55
1	22	55
1	39	55
1	48	55
1	52	55
1	78	55
1	3	56
1	25	56
1	42	56
1	66	56
1	95	56
1	98	56
1	6	57
1	10	57
1	16	57
1	37	57
1	89	57
1	96	57
1	17	58
1	18	58
1	19	58
1	24	58
1	29	58
1	79	58
1	60	59
1	91	59
1	92	59
1	36	60
1	40	60
1	8	61
1	22	61
1	28	61
1	46	61
1	94	61
1	29	62
1	34	62
1	88	62
1	10	63
1	13	63
1	57	63
1	1	64
1	18	64
1	34	64
1	47	64
1	50	64
1	76	64
1	100	64
1	41	65
1	58	65
1	6	66
1	17	66
1	42	66
1	58	66
1	75	66
1	77	66
1	96	66
1	16	67
1	55	67
1	70	67
1	72	67
1	9	68
1	12	68
1	30	68
1	57	68
1	60	68
1	3	69
1	43	69
1	78	69
1	90	69
1	98	69
1	8	70
1	17	70
1	27	70
1	38	70
1	65	70
1	10	71
1	16	71
1	19	71
1	79	71
1	86	71
1	63	72
1	71	72
1	10	73
1	24	73
1	52	73
1	5	74
1	9	74
1	53	74
1	9	75
1	10	75
1	19	75
1	42	75
1	49	75
1	52	75
1	61	75
1	67	75
1	25	76
1	42	76
1	45	76
1	52	76
1	64	76
1	4	77
1	11	77
1	39	77
1	55	77
1	71	77
1	82	77
1	92	77
1	8	78
1	57	78
1	71	78
1	31	79
1	36	79
1	42	79
1	72	79
1	90	79
1	60	80
1	71	80
1	92	80
1	4	81
1	22	81
1	38	81
1	39	81
1	41	81
1	49	81
1	84	81
1	48	82
1	53	82
1	65	82
1	71	82
1	18	83
1	19	83
1	28	83
1	38	83
1	63	83
1	65	83
1	99	83
1	2	84
1	6	84
1	8	84
1	15	84
1	26	84
1	63	84
1	96	84
1	10	85
1	13	85
1	57	85
1	71	85
1	74	85
1	99	85
1	11	86
1	15	86
1	47	86
1	62	86
1	98	86
1	28	87
1	49	87
1	30	88
1	10	89
1	37	89
1	39	89
1	49	89
1	81	89
1	93	89
1	18	90
1	30	90
1	1	91
1	5	91
1	21	91
1	32	91
1	51	91
1	68	91
1	83	91
1	27	92
1	40	92
1	71	92
1	72	92
1	95	92
1	18	93
1	32	93
1	84	93
1	98	93
1	9	94
1	12	94
1	46	94
1	57	94
1	58	94
1	73	94
1	75	94
1	79	94
1	74	95
1	83	95
1	18	96
1	25	96
1	34	96
1	12	97
1	33	97
1	43	97
1	47	97
1	90	97
1	24	98
1	37	98
1	54	98
1	56	98
1	88	98
1	18	99
1	21	99
1	43	99
1	44	99
1	58	99
1	8	100
1	26	100
1	41	100
2	11	1
2	93	1
2	100	1
2	20	2
2	39	2
2	54	2
2	56	2
2	57	2
2	95	2
2	32	3
2	51	3
2	98	3
2	15	4
2	22	4
2	24	4
2	40	4
2	69	4
2	95	4
2	3	5
2	6	5
2	43	5
2	71	5
2	90	5
2	92	5
2	19	6
2	23	6
2	97	6
2	5	7
2	13	7
2	22	7
2	34	7
2	93	7
2	96	7
2	7	8
2	37	8
2	44	8
2	57	8
2	71	8
2	88	8
2	99	8
2	27	9
2	35	9
2	57	9
2	73	9
2	94	9
2	6	10
2	12	10
2	22	10
2	37	10
2	39	10
2	66	10
2	82	10
2	100	10
2	9	11
2	11	11
2	16	11
2	26	11
2	31	11
2	42	11
2	43	11
2	80	11
2	81	11
2	10	12
2	40	12
2	58	12
2	69	12
2	17	13
2	24	13
2	40	13
2	73	13
2	98	13
2	2	14
2	4	14
2	18	14
2	66	14
2	64	15
2	65	15
2	68	15
2	78	15
2	2	16
2	6	16
2	18	16
2	40	16
2	49	16
2	51	16
2	87	16
2	94	16
2	22	17
2	31	17
2	63	17
2	74	17
2	83	17
2	1	18
2	9	18
2	16	18
2	60	18
2	73	18
2	77	18
2	17	19
2	25	19
2	45	19
2	50	19
2	51	19
2	1	20
2	8	20
2	19	20
2	39	20
2	59	20
2	61	20
2	63	20
2	72	20
2	31	21
2	62	21
2	66	21
2	23	22
2	60	22
2	73	22
2	78	22
2	90	22
2	41	23
2	47	23
2	78	23
2	85	23
2	93	23
2	1	24
2	14	24
2	53	24
2	75	24
2	96	24
2	16	25
2	20	25
2	40	25
2	43	25
2	65	25
2	82	25
2	88	25
2	97	25
2	3	26
2	7	26
2	10	26
2	12	26
2	29	26
2	36	26
2	51	26
2	52	26
2	61	26
2	12	27
2	18	27
2	29	27
2	38	27
2	62	27
2	10	28
2	11	28
2	19	28
2	57	28
2	73	28
2	24	29
2	33	29
2	58	29
2	61	29
2	69	29
2	95	29
2	7	30
2	10	30
2	55	30
2	88	30
2	98	30
2	52	31
2	97	31
2	99	31
2	31	32
2	39	32
2	58	32
2	93	32
2	5	33
2	12	33
2	70	33
2	85	33
2	79	34
2	85	34
2	7	35
2	11	35
2	23	35
2	47	35
2	54	35
2	62	35
2	94	35
2	98	35
2	1	36
2	7	36
2	22	36
2	22	37
2	47	37
2	74	37
2	99	37
2	100	37
2	32	38
2	38	38
2	46	38
2	53	38
2	94	38
2	5	39
2	20	39
2	41	39
2	77	39
2	92	39
2	32	40
2	41	40
2	69	40
2	71	40
2	95	40
2	26	41
2	46	41
2	81	41
2	17	42
2	76	42
2	95	42
2	96	42
2	99	42
2	7	43
2	33	43
2	44	43
2	67	43
2	78	43
2	85	43
2	3	44
2	27	44
2	41	44
2	49	44
2	12	45
2	44	45
2	50	45
2	79	45
2	96	45
2	98	45
2	99	45
2	2	46
2	48	46
2	54	46
2	63	46
2	1	47
2	4	47
2	19	47
2	42	47
2	88	47
2	97	47
2	98	47
2	13	48
2	29	48
2	30	48
2	31	48
2	52	48
2	11	49
2	15	49
2	33	49
2	52	49
2	55	49
2	60	49
2	3	50
2	4	50
2	31	50
2	18	51
2	36	51
2	38	51
2	42	51
2	64	51
2	87	51
2	96	51
2	7	52
2	27	52
2	59	52
2	94	52
2	96	52
2	48	53
2	57	53
2	64	53
2	81	53
2	83	53
2	100	53
2	28	54
2	36	54
2	52	54
2	64	54
2	10	55
2	18	55
2	50	55
2	52	55
2	63	55
2	76	55
2	97	55
2	13	56
2	21	56
2	41	56
2	84	56
2	86	56
2	89	56
2	44	57
2	45	57
2	52	57
2	76	57
2	78	57
2	83	57
2	87	57
2	13	58
2	36	58
2	45	58
2	54	58
2	57	58
2	1	59
2	10	59
2	19	59
2	9	60
2	35	60
2	42	61
2	59	61
2	81	61
2	91	61
2	59	62
2	66	62
2	70	62
2	47	63
2	78	63
2	87	63
2	93	63
2	100	63
2	28	64
2	51	64
2	15	65
2	23	65
2	39	65
2	54	65
2	93	65
2	94	65
2	7	66
2	48	66
2	55	66
2	70	66
2	76	66
2	98	66
2	5	67
2	13	67
2	20	67
2	33	67
2	45	67
2	50	67
2	71	67
2	74	67
2	14	68
2	21	68
2	76	68
2	16	69
2	17	69
2	25	69
2	45	69
2	46	69
2	62	69
2	68	69
2	95	69
2	2	70
2	18	70
2	36	70
2	40	70
2	42	70
2	54	70
2	68	70
2	74	70
2	3	71
2	7	71
2	26	71
2	30	71
2	76	71
2	88	71
2	56	72
2	67	72
2	71	72
2	80	72
2	26	73
2	31	73
2	46	73
2	27	74
2	38	74
2	57	74
2	4	75
2	9	75
2	19	75
2	29	75
2	67	75
2	12	76
2	61	76
2	76	76
2	84	76
2	99	76
2	61	77
2	11	78
2	18	78
2	30	78
2	40	78
2	48	78
2	56	78
2	14	79
2	53	79
2	99	79
2	72	80
2	73	80
2	75	80
2	12	81
2	41	81
2	73	81
2	82	81
2	98	81
2	2	82
2	8	82
2	25	82
2	39	82
2	51	82
2	61	82
2	91	82
2	92	82
2	6	83
2	13	83
2	37	83
2	75	83
2	82	83
2	92	83
2	45	84
2	62	84
2	13	85
2	52	85
2	55	85
2	96	85
2	33	86
2	36	86
2	37	86
2	41	86
2	43	86
2	51	86
2	79	86
2	98	86
2	1	87
2	22	87
2	31	87
2	37	87
2	40	87
2	50	87
2	62	87
2	81	87
2	84	87
2	2	88
2	5	88
2	8	88
2	19	88
2	23	88
2	31	88
2	36	88
2	82	88
2	93	88
2	96	88
2	6	89
2	23	89
2	49	89
2	76	89
2	88	89
2	3	90
2	9	90
2	26	90
2	35	90
2	45	90
2	93	90
2	96	90
2	32	91
2	70	91
2	5	92
2	28	92
2	40	93
2	44	93
2	63	93
2	89	93
2	4	94
2	22	94
2	50	94
2	59	94
2	45	95
2	47	95
2	76	95
2	82	95
2	94	95
2	8	96
2	32	96
2	62	96
2	77	96
2	23	97
2	63	97
2	69	97
2	24	98
2	31	98
2	34	98
2	2	99
2	8	99
2	30	99
2	68	99
2	93	99
2	24	100
2	46	100
2	61	100
2	75	100
2	92	100
3	8	1
3	45	1
3	61	1
3	76	1
3	34	2
3	62	2
3	6	3
3	38	3
3	61	3
3	88	3
3	11	4
3	16	4
3	17	4
3	19	4
3	26	4
3	36	4
3	50	4
3	54	4
3	56	4
3	68	4
3	16	5
3	52	5
3	78	5
3	21	6
3	27	6
3	40	6
3	67	6
3	70	6
3	79	6
3	98	6
3	27	7
3	61	7
3	64	7
3	91	7
3	36	8
3	44	8
3	77	8
3	89	9
3	96	9
3	44	10
3	54	10
3	69	10
3	80	10
3	87	10
3	28	11
3	43	11
3	45	11
3	54	11
3	65	11
3	21	12
3	25	12
3	31	12
3	53	12
3	66	12
3	22	13
3	49	13
3	59	13
3	65	13
3	66	13
3	68	13
3	3	14
3	24	14
3	32	14
3	35	14
3	37	14
3	41	14
3	68	14
3	77	14
3	81	14
3	42	15
3	73	15
3	76	15
3	89	15
3	1	16
3	48	16
3	76	16
3	81	16
3	86	16
3	89	16
3	3	17
3	13	17
3	18	17
3	19	17
3	36	17
3	57	17
3	63	17
3	64	17
3	87	17
3	47	18
3	57	18
3	66	18
3	81	18
3	7	19
3	11	19
3	21	19
3	51	19
3	66	19
3	84	19
3	96	19
3	98	19
3	41	20
3	54	20
3	76	20
3	87	20
3	14	21
3	29	21
3	34	22
3	40	22
3	57	22
3	59	22
3	77	22
3	87	22
3	24	23
3	7	24
3	15	24
3	18	24
3	54	24
3	60	24
3	69	24
3	79	24
3	97	24
3	68	25
3	91	25
3	95	25
3	11	26
3	24	26
3	32	26
3	33	26
3	94	26
3	99	26
3	18	27
3	47	27
3	55	27
3	11	28
3	39	28
3	12	29
3	39	29
3	88	29
3	96	29
3	100	29
3	52	30
3	69	30
3	6	31
3	9	31
3	53	31
3	70	31
3	71	31
3	72	31
3	81	31
3	4	32
3	32	32
3	37	32
3	58	32
3	63	32
3	81	32
3	8	33
3	9	33
3	34	33
3	56	33
3	83	33
3	22	34
3	27	34
3	43	34
3	84	34
3	100	34
3	52	35
3	73	35
3	81	35
3	98	35
3	18	36
3	19	36
3	33	36
3	84	36
3	8	37
3	31	37
3	55	37
3	98	37
3	13	38
3	48	38
3	76	38
3	21	39
3	46	39
3	73	39
3	88	39
3	5	40
3	27	40
3	54	40
3	16	41
3	35	41
3	41	41
3	50	41
3	56	41
3	66	41
3	76	41
3	79	41
3	90	41
3	10	42
3	39	42
3	60	42
3	92	42
3	10	43
3	19	43
3	22	43
3	90	43
3	92	43
3	10	44
3	12	44
3	84	44
3	12	45
3	14	45
3	29	45
3	44	45
3	90	45
3	92	46
3	12	47
3	37	47
3	85	47
3	14	48
3	37	48
3	49	48
3	80	48
3	91	48
3	9	49
3	12	49
3	61	49
3	81	49
3	2	50
3	14	50
3	28	50
3	67	50
3	79	50
3	25	51
3	79	51
3	34	52
3	56	52
3	64	52
3	65	52
3	75	52
3	82	52
3	41	53
3	44	53
3	50	53
3	65	53
3	88	53
3	58	54
3	81	54
3	4	55
3	7	55
3	11	55
3	29	55
3	30	55
3	79	55
3	82	55
3	1	56
3	6	56
3	18	56
3	25	56
3	28	56
3	48	56
3	67	56
3	98	56
3	12	57
3	34	57
3	48	57
3	64	57
3	66	57
3	15	58
3	25	58
3	30	58
3	39	58
3	44	58
3	83	58
3	3	59
3	41	59
3	42	59
3	48	59
3	70	59
3	98	59
3	14	60
3	37	60
3	11	61
3	20	61
3	31	61
3	49	61
3	64	61
3	69	61
3	90	61
3	26	62
3	45	62
3	76	62
3	88	62
3	11	63
3	21	63
3	58	63
3	89	63
3	5	64
3	19	64
3	33	64
3	95	64
3	7	65
3	9	65
3	62	65
3	72	65
3	87	65
3	8	66
3	14	66
3	20	66
3	63	66
3	92	66
3	22	67
3	30	67
3	74	67
3	88	67
3	91	67
3	25	68
3	56	68
3	93	68
3	7	69
3	33	69
3	39	69
3	82	69
3	1	70
3	10	70
3	19	70
3	20	70
3	36	70
3	29	71
3	48	71
3	82	71
3	19	72
3	41	72
3	63	72
3	74	72
3	36	73
3	71	73
3	76	73
3	96	73
3	2	74
3	12	74
3	62	74
3	63	74
3	84	74
3	43	75
3	72	75
3	80	75
3	20	76
3	71	76
3	8	77
3	22	77
3	40	77
3	44	77
3	71	77
3	4	78
3	6	78
3	14	78
3	18	78
3	29	78
3	30	78
3	67	78
3	82	78
3	8	79
3	12	79
3	24	79
3	50	79
3	59	79
3	65	79
3	68	79
3	80	79
3	8	80
3	17	80
3	75	80
3	77	80
3	82	80
3	2	81
3	26	81
3	31	81
3	38	81
3	44	81
3	45	81
3	68	81
3	91	81
3	99	81
3	100	81
3	21	82
3	27	82
3	28	82
3	68	82
3	98	82
3	24	83
3	52	83
3	71	83
3	15	84
3	20	84
3	22	84
3	39	84
3	47	84
3	13	85
3	23	85
3	30	85
3	48	85
3	55	85
3	58	85
3	60	85
3	61	85
3	79	85
3	30	86
3	31	86
3	33	86
3	45	86
3	48	86
3	49	86
3	66	86
3	91	86
3	37	87
3	73	87
3	74	87
3	76	87
3	92	87
3	27	88
3	28	88
3	34	88
3	67	88
3	75	88
3	92	88
3	17	89
3	24	89
3	31	89
3	41	89
3	12	90
3	14	90
3	35	90
3	38	90
3	57	90
3	66	90
3	7	91
3	16	91
3	17	91
3	41	91
3	46	91
3	55	91
3	7	92
3	37	92
3	43	92
3	44	92
3	87	92
3	89	92
3	6	93
3	7	93
3	38	93
3	49	93
3	58	93
3	24	94
3	34	94
3	47	94
3	53	94
3	76	94
3	4	95
3	43	95
3	83	95
3	4	96
3	23	96
3	64	96
3	76	96
3	17	97
3	29	97
3	32	97
3	57	97
3	1	98
3	28	98
3	81	98
3	10	99
3	45	99
3	50	99
3	73	99
3	6	100
3	39	100
3	57	100
3	91	100
3	100	100

## Sheet: Sheet7
1	22	1
1	45	1
1	63	1
1	77	1
1	87	1
1	8	2
1	9	2
1	38	2
1	54	2
1	96	2
1	6	3
1	34	3
1	35	3
1	38	3
1	42	3
1	55	3
1	56	3
1	61	3
1	78	3
1	83	3
1	2	4
1	6	4
1	8	4
1	22	4
1	25	4
1	58	4
1	78	4
1	99	4
1	100	4
1	3	5
1	6	5
1	14	5
1	18	5
1	23	5
1	38	5
1	81	5
1	82	5
1	12	6
1	16	6
1	30	6
1	49	6
1	68	6
1	1	7
1	7	7
1	24	7
1	28	7
1	58	7
1	63	7
1	80	7
1	3	8
1	20	8
1	89	8
1	77	9
1	93	9
1	5	10
1	44	10
1	66	10
1	10	11
1	29	11
1	42	11
1	73	11
1	88	11
1	15	12
1	37	12
1	70	12
1	80	12
1	84	12
1	86	12
1	98	12
1	3	13
1	44	13
1	64	13
1	66	13
1	75	13
1	87	13
1	96	13
1	12	14
1	37	14
1	78	14
1	88	14
1	90	14
1	5	15
1	35	15
1	66	15
1	81	15
1	98	15
1	15	16
1	56	16
1	22	17
1	31	17
1	44	17
1	55	17
1	79	17
1	92	17
1	93	17
1	8	18
1	37	18
1	41	18
1	67	18
1	76	19
1	37	20
1	41	20
1	65	20
1	78	20
1	35	21
1	40	21
1	43	21
1	54	21
1	72	21
1	76	21
1	91	21
1	4	22
1	60	22
1	15	23
1	36	23
1	44	23
1	63	23
1	87	23
1	29	24
1	67	24
1	75	24
1	2	25
1	5	25
1	8	25
1	39	25
1	72	25
1	79	25
1	10	26
1	17	26
1	21	26
1	27	26
1	32	26
1	69	26
1	71	26
1	78	26
1	80	26
1	93	26
1	36	27
1	39	27
1	49	27
1	82	27
1	89	28
1	22	29
1	29	29
1	39	29
1	72	29
1	91	29
1	27	30
1	34	30
1	39	30
1	56	30
1	58	30
1	65	30
1	76	30
1	4	31
1	6	31
1	11	31
1	42	31
1	67	31
1	71	31
1	83	31
1	96	31
1	20	32
1	66	32
1	91	32
1	92	32
1	14	33
1	46	33
1	75	33
1	82	33
1	28	34
1	29	34
1	30	34
1	54	34
1	56	34
1	67	34
1	74	34
1	79	34
1	86	34
1	93	34
1	100	34
1	2	35
1	22	35
1	35	35
1	45	35
1	47	35
1	54	35
1	56	35
1	8	36
1	51	36
1	79	36
1	88	36
1	95	36
1	2	37
1	40	37
1	46	37
1	51	37
1	54	37
1	96	37
1	26	38
1	29	38
1	41	38
1	49	38
1	54	38
1	65	38
1	81	38
1	90	38
1	12	39
1	50	39
1	93	39
1	98	39
1	6	40
1	14	40
1	25	40
1	26	40
1	29	40
1	58	40
1	59	40
1	83	40
1	96	40
1	41	41
1	63	41
1	65	41
1	23	42
1	35	42
1	45	42
1	89	42
1	98	42
1	79	43
1	20	44
1	24	44
1	28	44
1	32	44
1	63	44
1	77	44
1	79	44
1	89	44
1	90	44
1	91	44
1	9	45
1	13	45
1	17	45
1	37	45
1	46	45
1	63	45
1	96	45
1	2	46
1	21	46
1	32	46
1	54	46
1	96	46
1	18	47
1	65	47
1	80	47
1	81	47
1	86	47
1	16	48
1	18	48
1	28	48
1	31	48
1	84	48
1	24	49
1	41	49
1	83	49
1	12	50
1	26	50
1	66	50
1	24	51
1	35	51
1	41	51
1	64	51
1	65	51
1	98	51
1	99	51
1	39	52
1	85	52
1	62	53
1	84	53
1	7	54
1	19	54
1	24	54
1	53	54
1	55	54
1	82	54
1	90	54
1	30	55
1	35	55
1	6	56
1	21	56
1	65	56
1	76	56
1	40	57
1	47	57
1	70	57
1	98	57
1	6	58
1	13	58
1	15	58
1	38	58
1	64	58
1	51	59
1	65	59
1	70	59
1	79	59
1	85	59
1	17	60
1	22	60
1	62	60
1	96	60
1	28	61
1	39	61
1	47	61
1	71	61
1	74	61
1	89	61
1	5	62
1	8	62
1	24	62
1	32	62
1	74	62
1	30	63
1	45	63
1	58	63
1	82	63
1	89	63
1	33	64
1	40	64
1	51	64
1	66	64
1	71	64
1	84	64
1	98	64
1	4	65
1	13	65
1	21	65
1	54	65
1	63	65
1	70	65
1	75	65
1	77	65
1	7	66
1	57	66
1	70	66
1	80	66
1	95	66
1	22	67
1	37	67
1	72	67
1	17	68
1	46	68
1	60	68
1	66	68
1	67	68
1	3	69
1	11	69
1	17	69
1	42	69
1	16	70
1	28	70
1	43	70
1	61	70
1	47	71
1	57	71
1	19	72
1	51	72
1	72	72
1	51	73
1	53	73
1	57	73
1	90	73
1	91	73
1	32	74
1	37	74
1	53	74
1	60	74
1	68	74
1	99	74
1	61	75
1	10	76
1	21	76
1	90	76
1	20	77
1	22	77
1	37	77
1	69	77
1	70	77
1	87	77
1	88	77
1	91	77
1	95	77
1	3	78
1	16	78
1	23	78
1	55	78
1	75	78
1	86	78
1	87	78
1	57	79
1	24	80
1	34	80
1	39	80
1	41	80
1	68	80
1	72	80
1	76	80
1	90	80
1	20	81
1	31	81
1	91	81
1	44	82
1	75	82
1	86	82
1	90	82
1	99	82
1	6	83
1	17	83
1	42	83
1	51	83
1	69	83
1	12	84
1	37	84
1	51	84
1	59	84
1	65	84
1	74	84
1	95	84
1	24	85
1	43	85
1	47	85
1	49	85
1	60	85
1	69	85
1	78	85
1	87	85
1	17	86
1	25	86
1	37	86
1	46	86
1	50	86
1	18	87
1	28	87
1	62	87
1	86	87
1	5	88
1	14	88
1	22	88
1	28	88
1	45	88
1	29	89
1	47	89
1	68	89
1	99	89
1	35	90
1	60	90
1	84	90
1	96	90
1	32	91
1	33	91
1	93	91
1	13	92
1	34	92
1	36	92
1	56	92
1	10	93
1	33	93
1	57	93
1	20	94
1	22	94
1	49	94
1	61	94
1	96	94
1	4	95
1	14	95
1	37	95
1	48	95
1	67	95
1	24	96
1	38	96
1	61	96
1	69	96
1	75	96
1	90	96
1	30	97
1	72	97
1	83	97
1	3	98
1	34	98
1	62	98
1	3	99
1	60	99
1	81	99
1	88	99
1	98	99
1	10	100
1	24	100
1	31	100
1	46	100
1	60	100
1	98	100
2	20	1
2	34	1
2	63	1
2	88	1
2	8	2
2	24	2
2	44	2
2	46	2
2	60	2
2	74	2
2	88	2
2	90	2
2	35	3
2	37	3
2	48	3
2	54	3
2	90	3
2	92	3
2	19	4
2	21	4
2	36	4
2	82	4
2	100	4
2	5	5
2	14	5
2	21	5
2	81	5
2	88	5
2	23	6
2	36	6
2	45	6
2	88	6
2	100	6
2	7	7
2	13	7
2	65	7
2	70	7
2	9	8
2	15	8
2	16	8
2	43	8
2	50	8
2	85	8
2	90	8
2	2	9
2	8	9
2	10	9
2	89	9
2	91	9
2	98	9
2	45	10
2	52	10
2	60	10
2	80	10
2	91	10
2	99	10
2	10	11
2	24	11
2	37	11
2	41	11
2	51	11
2	87	11
2	89	11
2	11	12
2	26	12
2	42	12
2	45	12
2	86	12
2	2	13
2	10	13
2	12	13
2	49	13
2	66	13
2	75	13
2	90	13
2	6	14
2	30	14
2	42	14
2	64	14
2	66	14
2	95	14
2	26	15
2	46	15
2	48	15
2	54	15
2	67	15
2	81	15
2	41	16
2	43	16
2	64	16
2	28	17
2	30	17
2	35	17
2	58	17
2	19	18
2	25	18
2	4	19
2	8	19
2	13	19
2	46	19
2	52	19
2	75	19
2	87	19
2	91	19
2	28	20
2	89	20
2	94	20
2	17	21
2	39	21
2	58	21
2	26	22
2	29	22
2	37	22
2	45	22
2	10	23
2	30	23
2	43	23
2	59	23
2	68	23
2	92	23
2	22	24
2	36	24
2	38	24
2	51	24
2	99	24
2	1	25
2	34	25
2	84	25
2	95	25
2	29	26
2	40	26
2	48	26
2	53	26
2	66	26
2	76	26
2	80	26
2	9	27
2	16	27
2	29	27
2	53	27
2	75	27
2	83	27
2	93	27
2	94	27
2	1	28
2	24	28
2	55	28
2	60	28
2	90	28
2	10	29
2	17	29
2	30	29
2	32	29
2	34	29
2	51	29
2	56	29
2	82	29
2	13	30
2	34	30
2	48	30
2	79	30
2	1	32
2	29	32
2	48	32
2	50	32
2	52	32
2	63	32
2	67	32
2	71	32
2	74	32
2	7	33
2	20	33
2	26	33
2	40	33
2	64	33
2	76	33
2	77	33
2	12	34
2	14	34
2	20	34
2	75	34
2	78	34
2	98	34
2	8	35
2	26	35
2	29	35
2	79	35
2	95	35
2	98	35
2	18	36
2	54	36
2	65	36
2	78	36
2	100	36
2	5	37
2	15	37
2	41	37
2	44	37
2	70	37
2	82	37
2	85	37
2	2	38
2	14	38
2	71	38
2	28	39
2	71	39
2	72	39
2	77	39
2	9	40
2	39	40
2	47	40
2	48	40
2	49	40
2	70	40
2	4	41
2	17	42
2	22	42
2	37	42
2	39	42
2	45	42
2	63	42
2	64	42
2	98	42
2	45	43
2	72	43
2	86	43
2	96	43
2	73	44
2	87	44
2	7	45
2	48	45
2	17	46
2	37	46
2	78	46
2	19	47
2	54	47
2	55	47
2	64	47
2	66	47
2	74	47
2	89	47
2	37	48
2	42	48
2	47	48
2	63	48
2	76	48
2	2	49
2	3	49
2	30	49
2	43	49
2	58	49
2	61	49
2	7	50
2	13	50
2	46	50
2	73	50
2	29	51
2	51	51
2	7	52
2	24	52
2	30	52
2	32	53
2	34	53
2	36	53
2	39	53
2	40	53
2	85	53
2	90	53
2	7	54
2	10	54
2	29	54
2	35	54
2	40	54
2	54	54
2	56	54
2	81	54
2	24	55
2	52	55
2	54	55
2	16	56
2	19	56
2	26	56
2	34	56
2	36	56
2	56	56
2	60	56
2	69	56
2	11	57
2	59	57
2	80	57
2	93	57
2	94	57
2	96	57
2	46	58
2	71	58
2	85	58
2	95	58
2	43	59
2	70	59
2	74	59
2	95	59
2	6	60
2	18	60
2	40	60
2	45	60
2	57	60
2	58	60
2	66	60
2	95	60
2	8	61
2	40	61
2	69	61
2	99	61
2	19	62
2	20	62
2	42	62
2	56	62
2	60	62
2	88	62
2	100	62
2	6	63
2	20	63
2	21	63
2	40	63
2	54	63
2	63	63
2	74	63
2	89	63
2	6	64
2	29	64
2	53	64
2	55	64
2	67	64
2	4	65
2	51	65
2	78	65
2	89	65
2	20	66
2	38	66
2	52	66
2	58	66
2	7	67
2	8	67
2	64	67
2	93	67
2	56	68
2	63	68
2	96	68
2	16	69
2	19	69
2	24	69
2	89	69
2	8	70
2	68	70
2	80	70
2	13	71
2	65	71
2	2	72
2	6	72
2	26	72
2	65	72
2	99	72
2	28	73
2	44	73
2	51	73
2	61	73
2	93	73
2	96	73
2	99	73
2	15	74
2	22	74
2	33	74
2	39	74
2	44	74
2	51	74
2	53	74
2	71	74
2	85	74
2	87	74
2	27	75
2	45	75
2	61	75
2	67	75
2	31	76
2	85	76
2	87	76
2	1	77
2	10	77
2	12	77
2	15	77
2	30	77
2	31	77
2	68	77
2	82	77
2	96	77
2	15	78
2	49	78
2	73	78
2	87	78
2	98	78
2	26	79
2	29	79
2	66	79
2	85	79
2	86	79
2	88	79
2	20	80
2	37	80
2	49	80
2	53	80
2	74	80
2	76	80
2	8	81
2	22	81
2	43	81
2	69	81
2	94	81
2	96	81
2	2	82
2	4	82
2	21	82
2	44	82
2	53	82
2	64	82
2	75	82
2	76	82
2	82	82
2	23	83
2	30	83
2	38	83
2	40	83
2	79	83
2	7	84
2	65	84
2	79	84
2	99	84
2	100	84
2	19	85
2	46	85
2	95	85
2	37	86
2	38	86
2	48	86
2	67	86
2	71	86
2	99	86
2	1	87
2	6	87
2	15	87
2	27	87
2	47	87
2	65	87
2	71	87
2	50	88
2	73	88
2	84	88
2	88	88
2	95	88
2	97	88
2	24	89
2	89	89
2	91	89
2	3	90
2	5	90
2	17	90
2	20	90
2	76	90
2	4	91
2	22	91
2	32	91
2	49	91
2	57	91
2	76	91
2	88	91
2	89	91
2	94	91
2	98	91
2	17	92
2	23	92
2	30	92
2	21	93
2	42	93
2	62	93
2	66	93
2	70	93
2	77	93
2	93	93
2	16	94
2	20	94
2	32	94
2	46	94
2	49	94
2	64	94
2	73	94
2	80	94
2	85	94
2	87	94
2	91	94
2	16	95
2	36	95
2	40	95
2	94	95
2	5	96
2	7	96
2	8	96
2	16	96
2	42	96
2	52	96
2	15	97
2	36	97
2	41	97
2	83	97
2	31	98
2	49	98
2	59	98
2	62	98
2	65	98
2	69	98
2	20	99
2	43	99
2	63	99
2	68	99
2	83	99
2	94	99
2	3	100
2	56	100
2	67	100
2	93	100
3	7	1
3	44	1
3	49	1
3	67	1
3	86	1
3	94	1
3	3	2
3	9	2
3	39	2
3	58	2
3	60	2
3	15	3
3	28	3
3	40	3
3	43	3
3	54	3
3	62	3
3	68	3
3	78	3
3	7	4
3	37	4
3	44	4
3	47	4
3	58	5
3	85	5
3	10	6
3	11	6
3	20	6
3	62	6
3	70	6
3	71	6
3	80	6
3	86	6
3	99	6
3	59	7
3	80	7
3	83	7
3	3	8
3	33	8
3	41	8
3	82	8
3	13	9
3	41	9
3	44	9
3	55	9
3	18	10
3	38	10
3	50	10
3	54	10
3	74	10
3	85	10
3	95	10
3	23	11
3	41	11
3	43	11
3	75	11
3	87	11
3	94	11
3	41	12
3	65	12
3	83	12
3	95	12
3	4	13
3	18	13
3	39	13
3	49	13
3	57	13
3	58	13
3	64	13
3	86	13
3	87	13
3	89	13
3	3	14
3	69	14
3	8	15
3	26	15
3	28	15
3	32	15
3	92	15
3	97	15
3	14	16
3	15	16
3	16	16
3	45	16
3	54	16
3	62	16
3	73	16
3	22	17
3	29	17
3	34	17
3	64	17
3	77	17
3	76	18
3	84	18
3	88	18
3	10	19
3	38	19
3	63	19
3	92	19
3	94	19
3	5	20
3	42	20
3	62	20
3	90	20
3	19	21
3	22	21
3	33	21
3	36	21
3	65	21
3	70	21
3	71	21
3	97	21
3	57	22
3	61	22
3	79	22
3	38	23
3	77	23
3	41	24
3	69	24
3	87	24
3	44	25
3	51	25
3	72	25
3	86	25
3	99	25
3	18	26
3	32	26
3	70	26
3	95	26
3	10	27
3	37	27
3	80	27
3	34	28
3	41	28
3	59	28
3	69	28
3	88	28
3	25	29
3	26	29
3	41	29
3	43	29
3	60	29
3	29	30
3	35	30
3	42	30
3	44	30
3	45	30
3	49	30
3	51	30
3	52	30
3	82	30
3	94	30
3	95	30
3	3	31
3	49	31
3	50	31
3	65	31
3	71	31
3	19	32
3	32	32
3	77	32
3	99	32
3	16	33
3	22	33
3	30	33
3	33	33
3	50	33
3	89	33
3	93	33
3	31	34
3	37	34
3	44	34
3	70	34
3	74	34
3	35	35
3	43	35
3	68	35
3	83	35
3	95	35
3	14	36
3	19	36
3	24	36
3	38	36
3	42	36
3	68	36
3	78	36
3	80	36
3	90	36
3	96	36
3	4	37
3	16	37
3	35	37
3	38	37
3	42	37
3	61	37
3	72	37
3	81	37
3	84	37
3	93	37
3	95	37
3	100	37
3	2	38
3	11	38
3	30	38
3	33	38
3	70	38
3	91	38
3	94	38
3	40	39
3	53	39
3	54	39
3	58	39
3	62	39
3	95	39
3	29	40
3	31	40
3	39	40
3	55	40
3	76	40
3	12	41
3	37	41
3	50	41
3	62	41
3	81	41
3	91	41
3	1	42
3	13	42
3	35	42
3	45	42
3	63	42
3	75	42
3	88	42
3	90	42
3	2	43
3	3	43
3	16	43
3	18	43
3	35	43
3	81	43
3	85	43
3	96	43
3	13	44
3	20	44
3	76	44
3	84	44
3	34	45
3	76	45
3	96	45
3	12	46
3	39	46
3	42	46
3	48	46
3	82	46
3	98	46
3	18	47
3	58	47
3	16	48
3	13	49
3	40	49
3	85	49
3	32	50
3	60	50
3	76	50
3	84	50
3	87	50
3	88	50
3	92	50
3	95	50
3	97	50
3	9	51
3	13	51
3	44	51
3	70	51
3	11	52
3	26	52
3	34	52
3	62	52
3	66	52
3	84	52
3	95	52
3	5	53
3	49	53
3	52	53
3	57	53
3	76	53
3	1	54
3	39	54
3	50	54
3	55	54
3	91	54
3	94	54
3	29	55
3	46	55
3	62	55
3	9	56
3	36	56
3	39	56
3	63	56
3	64	56
3	76	56
3	81	56
3	24	57
3	50	57
3	60	57
3	88	57
3	2	58
3	16	58
3	46	58
3	57	58
3	23	59
3	50	59
3	52	59
3	30	60
3	38	60
3	43	60
3	54	60
3	58	60
3	62	60
3	66	60
3	58	61
3	60	61
3	63	61
3	72	61
3	90	61
3	13	62
3	25	62
3	38	62
3	44	62
3	45	62
3	66	62
3	72	62
3	83	62
3	97	62
3	19	63
3	22	63
3	29	63
3	39	63
3	44	63
3	50	63
3	52	63
3	60	63
3	21	64
3	25	64
3	51	64
3	78	64
3	2	65
3	27	65
3	32	65
3	33	65
3	45	65
3	59	65
3	90	65
3	99	65
3	14	66
3	17	66
3	100	66
3	29	67
3	32	67
3	36	67
3	48	67
3	50	67
3	52	67
3	77	67
3	100	67
3	36	68
3	52	68
3	63	68
3	79	68
3	91	68
3	35	69
3	47	69
3	59	69
3	69	69
3	81	69
3	85	69
3	12	70
3	20	70
3	56	70
3	91	70
3	94	70
3	6	71
3	64	71
3	96	71
3	16	72
3	19	72
3	29	72
3	33	72
3	58	72
3	73	72
3	75	72
3	78	72
3	98	72
3	12	73
3	13	73
3	29	73
3	69	73
3	88	73
3	6	74
3	11	74
3	20	74
3	25	74
3	50	74
3	64	74
3	34	75
3	38	75
3	42	75
3	52	75
3	65	75
3	6	76
3	14	76
3	38	76
3	62	76
3	6	77
3	14	77
3	27	77
3	61	77
3	87	77
3	91	77
3	15	78
3	16	78
3	22	78
3	33	78
3	47	78
3	56	78
3	72	78
3	74	78
3	91	78
3	3	79
3	13	79
3	66	79
3	69	79
3	90	79
3	2	80
3	20	80
3	95	80
3	23	81
3	38	81
3	69	81
3	70	81
3	77	81
3	14	82
3	49	82
3	79	82
3	58	83
3	82	83
3	86	83
3	6	84
3	20	84
3	26	84
3	27	84
3	13	85
3	26	85
3	30	85
3	46	85
3	53	85
3	56	85
3	60	85
3	65	85
3	12	86
3	44	86
3	100	86
3	26	87
3	41	87
3	56	87
3	69	87
3	81	87
3	92	87
3	93	87
3	45	88
3	72	88
3	76	88
3	16	89
3	23	89
3	24	89
3	27	89
3	38	89
3	47	89
3	58	89
3	76	89
3	88	89
3	90	89
3	92	89
3	8	90
3	25	90
3	27	90
3	37	90
3	39	90
3	79	90
3	30	91
3	34	91
3	43	91
3	44	91
3	49	91
3	25	92
3	44	92
3	55	92
3	88	92
3	94	92
3	95	92
3	2	93
3	4	93
3	23	93
3	31	93
3	66	93
3	88	93
3	92	93
3	4	94
3	20	94
3	28	94
3	50	94
3	51	94
3	77	94
3	58	95
3	78	95
3	7	96
3	25	96
3	42	96
3	86	96
3	90	96
3	5	97
3	10	97
3	34	97
3	97	97
3	22	98
3	49	98
3	54	98
3	73	98
3	74	98
3	7	99
3	9	99
3	37	99
3	52	99
3	81	99
3	100	99
3	34	100
3	54	100
3	56	100
3	61	100
3	86	100

## Sheet: Sheet8
1	2	1
1	15	1
1	32	1
1	45	1
1	56	1
1	64	1
1	78	1
1	81	1
1	5	2
1	7	2
1	13	2
1	24	2
1	26	2
1	35	2
1	50	2
1	10	3
1	15	3
1	30	3
1	35	3
1	36	3
1	47	3
1	49	3
1	24	4
1	43	4
1	64	4
1	77	4
1	1	5
1	26	5
1	29	5
1	35	5
1	38	5
1	47	5
1	76	5
1	82	5
1	88	5
1	92	5
1	7	6
1	20	6
1	25	6
1	28	6
1	30	6
1	61	6
1	66	6
1	67	6
1	90	6
1	94	6
1	97	6
1	16	7
1	33	7
1	45	7
1	57	7
1	75	7
1	100	7
1	4	8
1	13	8
1	50	8
1	53	8
1	64	8
1	68	8
1	72	8
1	97	8
1	1	9
1	39	9
1	54	9
1	83	9
1	89	9
1	3	10
1	4	10
1	5	10
1	8	10
1	10	10
1	45	10
1	96	10
1	100	10
1	48	11
1	64	11
1	53	12
1	56	12
1	60	12
1	63	12
1	66	12
1	75	12
1	14	13
1	43	13
1	53	13
1	97	13
1	25	14
1	44	14
1	95	14
1	96	14
1	3	15
1	8	15
1	11	15
1	31	15
1	33	15
1	42	15
1	63	15
1	91	15
1	93	15
1	11	16
1	34	16
1	39	16
1	62	16
1	84	16
1	52	17
1	79	17
1	89	17
1	17	18
1	60	18
1	1	19
1	4	19
1	79	19
1	1	20
1	4	20
1	6	20
1	11	20
1	36	20
1	46	20
1	83	20
1	7	21
1	38	21
1	40	21
1	43	21
1	53	21
1	75	21
1	78	21
1	38	22
1	53	22
1	72	22
1	82	22
1	50	23
1	91	23
1	99	23
1	24	24
1	62	24
1	78	24
1	95	24
1	2	25
1	15	25
1	55	25
1	76	25
1	86	25
1	57	26
1	61	26
1	62	26
1	90	26
1	92	26
1	48	27
1	79	27
1	93	27
1	96	27
1	10	28
1	21	29
1	32	29
1	18	30
1	65	30
1	66	30
1	86	30
1	8	31
1	20	31
1	23	31
1	31	31
1	77	31
1	94	31
1	7	32
1	22	32
1	30	32
1	31	32
1	45	32
1	64	32
1	73	32
1	98	32
1	4	33
1	68	33
1	93	33
1	2	34
1	49	34
1	1	35
1	13	35
1	19	35
1	28	35
1	54	35
1	82	35
1	85	35
1	99	35
1	32	36
1	44	36
1	47	36
1	83	36
1	85	36
1	9	37
1	20	37
1	27	37
1	62	37
1	87	37
1	21	38
1	36	38
1	43	38
1	79	38
1	82	38
1	28	39
1	44	39
1	49	39
1	68	39
1	80	39
1	40	40
1	44	40
1	48	40
1	62	40
1	80	40
1	82	40
1	7	41
1	28	41
1	29	41
1	45	41
1	64	41
1	74	41
1	21	42
1	28	42
1	40	42
1	67	42
1	17	43
1	32	43
1	38	43
1	57	43
1	68	43
1	69	43
1	75	43
1	76	43
1	77	43
1	13	44
1	14	44
1	21	44
1	59	44
1	72	44
1	93	44
1	98	44
1	17	45
1	18	45
1	22	45
1	24	45
1	41	45
1	51	45
1	93	45
1	1	46
1	2	46
1	8	46
1	14	46
1	53	46
1	51	47
1	52	47
1	55	47
1	73	47
1	77	47
1	81	47
1	89	47
1	95	47
1	100	47
1	12	48
1	33	48
1	47	48
1	53	48
1	59	48
1	61	48
1	94	48
1	2	49
1	77	49
1	99	49
1	1	50
1	20	50
1	38	50
1	49	50
1	59	50
1	92	50
1	6	51
1	15	51
1	21	51
1	23	51
1	26	51
1	43	51
1	48	51
1	56	51
1	90	51
1	46	52
1	99	52
1	11	53
1	17	53
1	31	53
1	41	53
1	54	53
1	71	53
1	8	54
1	15	54
1	21	54
1	22	54
1	75	54
1	84	54
1	53	55
1	79	55
1	82	55
1	97	55
1	4	56
1	6	56
1	23	56
1	26	56
1	30	56
1	33	56
1	72	56
1	84	56
1	19	57
1	35	57
1	86	57
1	8	58
1	28	58
1	41	58
1	67	58
1	9	59
1	13	59
1	96	59
1	16	60
1	89	60
1	35	61
1	36	61
1	50	61
1	53	61
1	57	61
1	95	61
1	16	62
1	24	64
1	28	64
1	35	64
1	36	64
1	59	64
1	65	64
1	91	64
1	61	65
1	84	65
1	91	65
1	100	65
1	30	66
1	42	66
1	44	66
1	52	66
1	78	66
1	26	67
1	58	67
1	8	68
1	22	68
1	25	68
1	42	68
1	51	68
1	60	68
1	82	68
1	89	68
1	41	69
1	55	69
1	74	69
1	30	70
1	42	70
1	66	70
1	74	70
1	86	70
1	87	70
1	95	70
1	3	71
1	7	71
1	14	71
1	53	71
1	55	71
1	60	71
1	50	72
1	82	72
1	94	72
1	95	72
1	37	73
1	45	73
1	63	73
1	9	74
1	16	74
1	34	74
1	43	74
1	5	75
1	14	75
1	38	75
1	65	75
1	73	75
1	24	76
1	35	76
1	88	76
1	92	76
1	14	77
1	20	77
1	44	77
1	59	77
1	4	78
1	9	78
1	12	78
1	32	78
1	75	78
1	17	79
1	90	79
1	5	80
1	13	80
1	34	80
1	58	80
1	68	80
1	73	80
1	80	80
1	97	80
1	4	81
1	13	81
1	19	81
1	30	81
1	35	81
1	38	81
1	64	81
1	78	81
1	12	82
1	14	82
1	20	82
1	40	82
1	52	82
1	73	82
1	98	82
1	100	82
1	18	83
1	22	83
1	79	83
1	14	84
1	31	84
1	47	84
1	52	84
1	67	84
1	34	85
1	46	85
1	60	85
1	63	85
1	65	85
1	91	85
1	71	86
1	74	86
1	31	87
1	47	87
1	59	87
1	96	87
1	18	88
1	55	88
1	65	88
1	80	88
1	83	88
1	91	88
1	55	89
1	56	89
1	71	89
1	100	89
1	2	90
1	3	90
1	34	90
1	41	90
1	51	90
1	91	90
1	2	91
1	35	91
1	38	91
1	61	91
1	82	91
1	93	91
1	6	92
1	12	92
1	42	92
1	55	92
1	72	92
1	81	92
1	83	92
1	8	93
1	15	93
1	21	93
1	51	93
1	75	93
1	77	93
1	34	94
1	54	94
1	56	94
1	47	95
1	55	95
1	58	95
1	4	96
1	9	96
1	18	96
1	49	96
1	60	96
1	74	96
1	87	96
1	9	97
1	51	97
1	63	97
1	76	97
1	88	97
1	28	98
1	92	98
1	9	99
1	10	99
1	44	99
1	47	99
1	48	99
1	54	99
1	15	100
1	28	100
1	50	100
2	17	1
2	49	1
2	74	1
2	77	1
2	84	1
2	95	1
2	100	1
2	2	2
2	13	2
2	28	2
2	79	2
2	91	2
2	8	3
2	14	3
2	39	3
2	63	3
2	67	3
2	86	3
2	12	5
2	44	5
2	70	5
2	79	5
2	91	5
2	23	6
2	56	6
2	59	6
2	68	6
2	81	6
2	93	6
2	16	7
2	31	7
2	38	7
2	63	7
2	87	7
2	12	8
2	32	8
2	38	8
2	47	8
2	21	9
2	28	9
2	44	9
2	63	9
2	70	9
2	90	9
2	8	10
2	41	10
2	44	10
2	47	10
2	3	11
2	27	11
2	42	11
2	58	11
2	60	11
2	69	11
2	24	12
2	26	12
2	76	12
2	87	12
2	64	13
2	25	14
2	51	14
2	52	14
2	82	14
2	15	15
2	16	15
2	37	15
2	68	15
2	70	15
2	14	16
2	28	16
2	29	16
2	30	16
2	68	16
2	73	16
2	74	16
2	82	17
2	7	18
2	20	18
2	49	18
2	52	18
2	62	18
2	98	18
2	9	19
2	15	19
2	29	19
2	78	19
2	90	19
2	47	20
2	48	20
2	88	20
2	25	21
2	29	21
2	39	21
2	65	21
2	79	21
2	68	22
2	79	22
2	32	23
2	51	23
2	87	23
2	12	24
2	15	24
2	71	24
2	75	24
2	76	24
2	48	25
2	58	25
2	59	25
2	68	25
2	96	25
2	23	26
2	43	26
2	55	26
2	69	26
2	72	26
2	66	27
2	67	27
2	68	27
2	4	28
2	9	28
2	11	28
2	15	28
2	17	28
2	45	28
2	33	29
2	42	29
2	86	29
2	43	30
2	53	30
2	57	30
2	33	31
2	40	31
2	53	31
2	57	31
2	58	31
2	63	31
2	64	31
2	84	31
2	30	32
2	37	32
2	44	32
2	45	32
2	50	32
2	66	32
2	80	32
2	92	32
2	9	33
2	16	33
2	57	33
2	65	33
2	89	34
2	91	34
2	10	35
2	13	35
2	22	35
2	27	35
2	50	35
2	56	35
2	76	35
2	94	35
2	9	36
2	14	36
2	19	36
2	22	36
2	36	36
2	49	36
2	70	36
2	84	36
2	99	36
2	2	37
2	42	37
2	61	37
2	95	37
2	100	37
2	2	38
2	44	38
2	53	38
2	7	39
2	34	39
2	46	39
2	86	39
2	34	40
2	49	40
2	88	40
2	23	41
2	87	41
2	50	42
2	62	42
2	65	42
2	66	42
2	81	42
2	23	43
2	26	43
2	29	43
2	78	43
2	8	44
2	37	44
2	76	44
2	88	44
2	8	45
2	14	45
2	42	45
2	57	45
2	74	45
2	95	45
2	20	46
2	29	46
2	76	46
2	83	46
2	95	46
2	13	47
2	50	47
2	51	47
2	64	47
2	83	47
2	95	47
2	99	47
2	35	48
2	89	48
2	1	49
2	45	49
2	49	49
2	66	49
2	74	49
2	95	49
2	25	50
2	40	50
2	48	50
2	64	50
2	80	50
2	91	50
2	28	51
2	40	51
2	68	51
2	91	51
2	95	51
2	98	51
2	99	51
2	65	52
2	79	52
2	88	52
2	90	52
2	93	52
2	95	52
2	32	53
2	39	53
2	54	53
2	72	53
2	20	54
2	43	54
2	78	54
2	38	55
2	87	55
2	9	56
2	14	56
2	22	56
2	73	56
2	76	56
2	7	57
2	55	57
2	72	57
2	76	57
2	59	58
2	26	59
2	48	59
2	49	59
2	50	59
2	76	59
2	92	59
2	97	59
2	34	60
2	40	60
2	57	60
2	100	60
2	4	61
2	38	61
2	52	61
2	54	61
2	2	62
2	21	62
2	32	62
2	76	62
2	80	62
2	92	62
2	29	63
2	58	63
2	69	63
2	84	63
2	91	63
2	12	64
2	17	64
2	37	64
2	69	64
2	84	64
2	91	64
2	20	65
2	54	65
2	72	65
2	20	66
2	90	66
2	61	67
2	77	67
2	92	67
2	18	68
2	39	68
2	77	68
2	95	68
2	6	69
2	15	69
2	18	69
2	22	69
2	27	69
2	49	69
2	57	69
2	3	70
2	18	70
2	41	70
2	44	70
2	61	70
2	97	70
2	21	71
2	30	71
2	42	71
2	49	71
2	51	71
2	90	71
2	5	74
2	6	74
2	27	74
2	52	74
2	89	74
2	96	74
2	8	75
2	26	75
2	48	75
2	57	75
2	64	75
2	67	75
2	69	75
2	73	75
2	24	76
2	44	76
2	57	76
2	80	76
2	5	77
2	18	77
2	21	77
2	50	77
2	58	77
2	73	77
2	95	77
2	84	78
2	22	79
2	45	79
2	61	79
2	63	79
2	70	79
2	78	79
2	84	79
2	2	80
2	5	80
2	8	80
2	29	80
2	39	80
2	42	80
2	46	80
2	65	80
2	12	81
2	13	81
2	67	81
2	96	81
2	35	82
2	47	82
2	61	82
2	19	83
2	32	83
2	40	83
2	50	83
2	80	83
2	93	83
2	100	83
2	17	84
2	23	84
2	34	84
2	49	84
2	55	84
2	98	84
2	23	85
2	51	85
2	73	85
2	75	85
2	79	85
2	100	85
2	10	86
2	44	86
2	75	86
2	82	86
2	21	87
2	23	87
2	37	87
2	63	87
2	72	87
2	97	87
2	2	88
2	14	88
2	16	88
2	89	88
2	30	89
2	40	89
2	98	89
2	1	90
2	3	90
2	19	90
2	32	90
2	56	90
2	62	90
2	67	90
2	73	90
2	10	91
2	11	91
2	12	91
2	22	91
2	41	91
2	42	91
2	37	92
2	48	92
2	74	92
2	77	92
2	80	92
2	89	92
2	96	92
2	98	92
2	10	93
2	27	93
2	49	93
2	57	93
2	63	93
2	77	93
2	85	93
2	91	93
2	97	93
2	16	94
2	85	94
2	7	95
2	16	95
2	34	95
2	71	95
2	80	95
2	23	96
2	41	96
2	42	96
2	63	96
2	64	96
2	1	97
2	7	97
2	13	97
2	19	97
2	20	97
2	46	97
2	73	97
2	90	97
2	91	97
2	4	98
2	6	98
2	74	98
2	92	98
2	99	98
2	2	99
2	31	99
2	72	99
2	76	99
2	82	99
2	88	99
2	5	100
2	34	100
2	81	100
2	91	100
2	94	100
2	99	100
3	40	1
3	49	1
3	57	1
3	76	1
3	88	1
3	91	1
3	98	1
3	21	2
3	28	2
3	54	2
3	89	2
3	95	2
3	20	3
3	30	3
3	66	3
3	84	3
3	89	3
3	3	4
3	20	4
3	30	4
3	41	4
3	43	4
3	48	4
3	74	4
3	20	5
3	69	5
3	5	6
3	10	6
3	12	6
3	49	6
3	50	6
3	85	6
3	94	6
3	100	6
3	29	7
3	40	7
3	2	8
3	100	8
3	33	9
3	71	9
3	78	9
3	16	10
3	38	10
3	42	10
3	78	10
3	14	11
3	20	11
3	27	11
3	58	11
3	96	11
3	27	12
3	53	12
3	55	12
3	73	12
3	74	12
3	13	13
3	15	13
3	30	13
3	34	13
3	38	13
3	68	13
3	72	13
3	79	13
3	94	13
3	13	14
3	23	14
3	46	14
3	62	14
3	71	14
3	88	14
3	12	15
3	22	15
3	26	15
3	43	15
3	45	15
3	46	15
3	52	15
3	61	15
3	62	15
3	75	15
3	77	15
3	96	15
3	96	16
3	97	16
3	32	17
3	75	17
3	18	18
3	36	18
3	37	18
3	85	18
3	91	18
3	96	18
3	5	19
3	34	19
3	36	19
3	58	19
3	96	19
3	76	20
3	1	21
3	4	21
3	15	21
3	34	21
3	65	21
3	66	21
3	95	21
3	27	22
3	45	22
3	80	22
3	2	23
3	25	23
3	36	23
3	51	23
3	60	23
3	62	23
3	63	23
3	44	24
3	48	24
3	69	24
3	77	24
3	95	24
3	6	25
3	13	25
3	48	25
3	54	25
3	62	25
3	70	25
3	75	25
3	88	25
3	87	26
3	94	26
3	17	27
3	19	27
3	25	27
3	31	27
3	66	27
3	69	27
3	74	27
3	93	27
3	16	28
3	26	28
3	39	28
3	69	28
3	82	28
3	96	28
3	17	29
3	26	29
3	39	29
3	54	29
3	86	29
3	2	30
3	9	30
3	25	30
3	39	30
3	72	30
3	97	30
3	34	31
3	51	31
3	52	31
3	53	31
3	55	31
3	90	31
3	29	32
3	52	32
3	75	32
3	78	32
3	26	33
3	38	33
3	45	33
3	52	33
3	88	33
3	95	33
3	98	33
3	99	33
3	12	34
3	24	34
3	61	34
3	100	34
3	2	35
3	16	35
3	24	35
3	30	35
3	33	35
3	68	35
3	74	35
3	78	35
3	91	35
3	97	35
3	70	36
3	1	37
3	3	37
3	12	37
3	27	37
3	28	37
3	34	37
3	70	37
3	73	37
3	95	37
3	37	38
3	93	38
3	45	39
3	56	39
3	77	39
3	84	39
3	88	39
3	6	40
3	12	40
3	38	40
3	64	40
3	84	40
3	86	40
3	19	41
3	20	41
3	23	41
3	30	41
3	36	41
3	38	41
3	39	41
3	47	41
3	54	41
3	56	41
3	57	41
3	65	41
3	69	41
3	97	41
3	11	42
3	20	42
3	22	42
3	24	42
3	43	42
3	72	42
3	97	42
3	98	42
3	27	43
3	29	43
3	51	43
3	69	43
3	96	43
3	2	44
3	34	44
3	35	44
3	58	44
3	59	44
3	79	44
3	93	44
3	100	44
3	20	45
3	23	45
3	24	45
3	92	45
3	9	46
3	73	46
3	93	46
3	37	47
3	43	47
3	92	47
3	28	48
3	66	48
3	76	48
3	84	48
3	36	49
3	42	49
3	43	49
3	55	49
3	63	49
3	73	49
3	99	49
3	35	50
3	56	50
3	65	50
3	8	51
3	54	51
3	7	52
3	8	52
3	14	52
3	30	52
3	39	52
3	46	52
3	84	52
3	7	53
3	48	53
3	58	53
3	8	54
3	13	54
3	18	54
3	33	54
3	43	54
3	52	54
3	56	54
3	64	54
3	83	54
3	88	54
3	99	54
3	1	55
3	5	55
3	64	55
3	68	55
3	86	55
3	88	55
3	8	56
3	24	56
3	29	56
3	54	56
3	57	56
3	75	56
3	88	56
3	91	56
3	11	57
3	41	57
3	55	57
3	76	57
3	89	57
3	48	58
3	72	58
3	79	58
3	81	58
3	7	59
3	19	59
3	28	59
3	43	59
3	57	59
3	76	59
3	77	59
3	41	60
3	52	60
3	54	60
3	64	60
3	90	60
3	9	61
3	48	61
3	51	61
3	54	61
3	60	61
3	64	61
3	75	61
3	2	62
3	8	62
3	30	62
3	45	62
3	69	62
3	77	62
3	5	63
3	7	63
3	45	63
3	59	63
3	88	63
3	96	63
3	20	64
3	53	64
3	64	64
3	76	64
3	11	65
3	22	65
3	38	65
3	44	65
3	77	65
3	82	65
3	85	65
3	4	66
3	34	66
3	37	66
3	44	66
3	49	66
3	64	66
3	67	66
3	74	66
3	5	67
3	17	67
3	23	67
3	25	67
3	49	67
3	54	67
3	64	67
3	79	67
3	99	67
3	11	68
3	31	68
3	43	68
3	47	68
3	63	68
3	69	68
3	82	68
3	84	68
3	6	69
3	25	69
3	37	69
3	64	69
3	77	69
3	82	69
3	95	69
3	98	69
3	2	70
3	72	70
3	78	70
3	91	70
3	19	71
3	38	72
3	62	72
3	88	72
3	97	72
3	19	73
3	23	73
3	34	73
3	80	73
3	86	73
3	99	73
3	25	74
3	26	74
3	47	74
3	46	75
3	56	75
3	17	76
3	40	76
3	49	76
3	63	76
3	80	76
3	30	77
3	65	77
3	88	77
3	89	77
3	8	78
3	36	78
3	64	78
3	100	79
3	5	80
3	7	80
3	18	80
3	25	80
3	32	80
3	35	80
3	56	80
3	63	80
3	76	80
3	31	81
3	22	82
3	35	82
3	96	82
3	11	83
3	52	83
3	67	83
3	69	83
3	97	83
3	19	84
3	21	84
3	39	84
3	43	84
3	44	84
3	48	84
3	69	84
3	80	84
3	31	85
3	48	85
3	71	85
3	72	85
3	79	85
3	85	85
3	89	85
3	59	86
3	63	86
3	81	86
3	95	86
3	97	86
3	59	87
3	98	87
3	19	88
3	27	88
3	61	88
3	65	88
3	78	88
3	82	88
3	89	88
3	97	88
3	33	89
3	62	89
3	91	89
3	12	90
3	33	90
3	41	90
3	50	90
3	68	90
3	48	91
3	49	91
3	53	91
3	57	91
3	65	91
3	72	91
3	100	91
3	33	92
3	51	92
3	59	92
3	69	92
3	72	92
3	2	93
3	10	93
3	21	93
3	26	93
3	71	93
3	73	93
3	94	93
3	40	94
3	45	94
3	69	94
3	81	94
3	32	95
3	47	95
3	18	96
3	35	96
3	72	96
3	95	96
3	83	97
3	95	97
3	5	98
3	7	98
3	32	98
3	62	98
3	68	98
3	75	98
3	76	98
3	5	99
3	33	99
3	56	99
3	67	99
3	72	99
3	93	99
3	90	100

## Sheet: Sheet9
1	42	1
1	52	1
1	57	1
1	67	1
1	93	1
1	27	2
1	45	2
1	62	2
1	69	2
1	25	3
1	26	3
1	35	3
1	41	3
1	65	3
1	8	4
1	15	4
1	38	4
1	54	4
1	70	4
1	72	4
1	87	4
1	96	4
1	100	4
1	6	5
1	18	5
1	23	5
1	34	5
1	38	5
1	57	5
1	96	5
1	98	5
1	14	6
1	50	6
1	3	7
1	17	7
1	37	7
1	48	7
1	85	7
1	96	7
1	12	8
1	16	8
1	26	8
1	45	8
1	47	8
1	49	8
1	56	8
1	90	8
1	36	9
1	45	9
1	46	9
1	58	9
1	8	10
1	20	10
1	56	10
1	65	10
1	82	10
1	83	10
1	84	10
1	100	10
1	70	11
1	94	11
1	67	12
1	89	12
1	33	13
1	43	13
1	14	14
1	35	14
1	45	14
1	55	14
1	68	14
1	72	14
1	74	14
1	86	14
1	1	15
1	16	15
1	37	15
1	76	15
1	78	15
1	87	15
1	99	15
1	6	16
1	16	16
1	38	16
1	42	16
1	46	16
1	78	16
1	5	17
1	23	17
1	35	17
1	43	17
1	58	17
1	72	17
1	78	17
1	23	18
1	35	18
1	99	18
1	25	19
1	29	19
1	45	19
1	64	19
1	37	20
1	41	20
1	73	20
1	87	20
1	11	21
1	20	21
1	21	21
1	37	21
1	43	21
1	75	21
1	90	21
1	1	22
1	9	22
1	27	22
1	54	22
1	55	22
1	95	22
1	99	22
1	9	23
1	15	23
1	27	23
1	58	23
1	63	23
1	71	23
1	18	24
1	26	24
1	47	24
1	50	24
1	76	24
1	80	24
1	85	24
1	88	24
1	17	25
1	34	25
1	42	25
1	91	25
1	9	26
1	15	26
1	43	26
1	62	26
1	69	26
1	74	26
1	3	27
1	16	27
1	26	27
1	38	27
1	46	27
1	48	27
1	57	27
1	69	27
1	73	27
1	82	27
1	88	27
1	9	28
1	77	28
1	18	29
1	19	29
1	56	29
1	62	29
1	73	29
1	89	29
1	93	29
1	19	30
1	23	30
1	28	30
1	36	30
1	50	30
1	71	30
1	7	31
1	35	32
1	79	32
1	87	32
1	92	32
1	99	32
1	12	33
1	30	33
1	38	33
1	45	33
1	50	33
1	91	33
1	94	33
1	3	34
1	26	34
1	35	34
1	67	34
1	98	34
1	14	35
1	19	35
1	65	35
1	93	35
1	100	35
1	33	36
1	66	36
1	67	36
1	78	36
1	92	36
1	11	37
1	15	37
1	38	37
1	47	37
1	48	37
1	50	37
1	76	37
1	87	37
1	26	38
1	33	38
1	34	38
1	78	38
1	19	39
1	92	39
1	98	39
1	49	40
1	72	40
1	99	40
1	20	41
1	23	41
1	34	41
1	75	41
1	88	41
1	96	41
1	20	42
1	22	42
1	46	42
1	60	42
1	11	43
1	17	43
1	22	43
1	24	43
1	39	43
1	65	43
1	7	44
1	87	45
1	91	45
1	13	46
1	73	46
1	89	46
1	6	47
1	50	47
1	51	47
1	90	47
1	67	48
1	83	48
1	87	48
1	97	48
1	3	49
1	1	50
1	13	50
1	34	50
1	41	50
1	44	50
1	77	50
1	88	50
1	98	50
1	17	51
1	21	51
1	35	51
1	65	51
1	66	51
1	100	51
1	24	52
1	46	52
1	60	52
1	85	52
1	90	52
1	97	52
1	100	52
1	12	53
1	66	53
1	5	54
1	10	54
1	11	54
1	36	54
1	43	54
1	81	54
1	98	54
1	7	55
1	18	55
1	44	55
1	46	55
1	98	55
1	28	56
1	42	56
1	44	56
1	57	56
1	80	56
1	84	56
1	3	57
1	27	57
1	53	57
1	57	57
1	77	57
1	80	57
1	90	57
1	97	57
1	12	58
1	67	58
1	79	58
1	87	58
1	89	58
1	5	59
1	65	59
1	73	59
1	97	59
1	100	59
1	15	60
1	45	60
1	51	60
1	72	60
1	84	60
1	92	60
1	98	60
1	29	61
1	67	61
1	100	61
1	6	62
1	11	62
1	37	62
1	59	62
1	73	62
1	78	62
1	84	62
1	99	62
1	47	63
1	90	63
1	99	63
1	23	64
1	31	64
1	79	64
1	97	64
1	4	65
1	8	65
1	68	65
1	75	65
1	99	65
1	100	65
1	12	66
1	39	66
1	46	66
1	94	66
1	2	67
1	10	67
1	30	67
1	65	67
1	77	67
1	89	67
1	66	68
1	75	68
1	89	68
1	94	68
1	3	69
1	19	69
1	54	69
1	67	69
1	88	69
1	99	69
1	29	70
1	49	70
1	41	71
1	76	71
1	85	71
1	10	72
1	19	72
1	42	72
1	49	72
1	75	72
1	94	72
1	99	72
1	6	73
1	19	73
1	20	73
1	22	73
1	32	73
1	38	73
1	44	73
1	50	73
1	51	73
1	52	73
1	70	73
1	82	73
1	89	73
1	100	73
1	54	74
1	55	74
1	58	74
1	79	74
1	93	74
1	31	75
1	90	75
1	6	76
1	17	76
1	19	76
1	26	76
1	30	76
1	56	76
1	68	76
1	80	76
1	19	77
1	39	77
1	13	78
1	26	78
1	27	78
1	28	78
1	35	78
1	42	78
1	50	78
1	61	78
1	73	78
1	94	78
1	14	79
1	34	79
1	43	79
1	72	79
1	78	79
1	84	79
1	94	79
1	97	79
1	16	80
1	27	80
1	34	80
1	77	80
1	80	80
1	15	81
1	42	81
1	49	81
1	57	81
1	70	81
1	74	81
1	98	81
1	14	82
1	35	82
1	1	83
1	15	83
1	17	83
1	24	83
1	37	83
1	49	83
1	63	83
1	66	83
1	90	83
1	91	83
1	11	84
1	15	84
1	30	84
1	53	85
1	67	85
1	11	86
1	71	86
1	97	86
1	5	87
1	29	87
1	55	87
1	61	87
1	85	87
1	86	87
1	94	87
1	14	88
1	21	88
1	50	88
1	99	88
1	3	89
1	12	89
1	47	89
1	83	89
1	84	89
1	88	89
1	36	90
1	42	90
1	65	90
1	96	90
1	32	91
1	69	91
1	70	91
1	27	92
1	39	92
1	43	92
1	64	92
1	76	92
1	96	92
1	40	93
1	94	93
1	4	94
1	20	94
1	32	94
1	36	94
1	39	94
1	92	94
1	9	95
1	22	95
1	24	95
1	11	96
1	14	96
1	15	96
1	53	96
1	79	96
1	5	97
1	32	97
1	53	97
1	56	97
1	58	97
1	82	97
1	85	97
1	8	98
1	27	98
1	33	98
1	47	98
1	59	98
1	63	98
1	68	98
1	71	98
1	85	98
1	90	98
1	96	98
1	7	99
1	28	99
1	68	99
1	70	99
1	94	99
1	7	100
1	20	100
1	36	100
1	38	100
1	84	100
1	99	100
1	100	100
2	22	1
2	36	1
2	59	1
2	66	1
2	68	1
2	86	1
2	92	1
2	95	1
2	2	2
2	16	2
2	24	2
2	81	2
2	7	3
2	32	3
2	53	3
2	65	3
2	73	3
2	82	3
2	9	4
2	19	4
2	51	4
2	81	4
2	84	4
2	94	4
2	11	5
2	31	5
2	42	5
2	53	5
2	88	5
2	34	6
2	86	6
2	46	7
2	21	8
2	44	8
2	75	8
2	94	8
2	96	8
2	33	9
2	38	9
2	45	9
2	60	9
2	65	9
2	20	10
2	2	11
2	44	11
2	65	11
2	67	11
2	96	11
2	14	12
2	47	12
2	48	12
2	74	12
2	75	12
2	52	13
2	49	14
2	67	14
2	16	15
2	35	15
2	40	15
2	48	15
2	55	15
2	65	15
2	79	15
2	85	15
2	5	16
2	10	16
2	27	16
2	34	16
2	58	16
2	63	16
2	88	16
2	90	16
2	14	17
2	20	17
2	48	17
2	92	17
2	50	18
2	65	18
2	66	18
2	78	18
2	12	19
2	67	19
2	77	19
2	97	19
2	7	20
2	22	20
2	55	20
2	87	20
2	9	21
2	22	21
2	41	21
2	61	21
2	86	21
2	100	21
2	11	22
2	13	22
2	22	22
2	25	22
2	28	22
2	42	22
2	70	22
2	95	22
2	11	23
2	19	23
2	32	23
2	34	23
2	39	23
2	78	23
2	84	23
2	92	23
2	20	24
2	40	24
2	76	24
2	98	24
2	57	25
2	74	25
2	37	26
2	41	26
2	43	26
2	44	26
2	55	26
2	68	26
2	10	27
2	44	27
2	46	27
2	57	27
2	29	28
2	32	28
2	48	28
2	61	28
2	74	28
2	91	28
2	31	29
2	55	29
2	59	29
2	96	29
2	1	30
2	38	30
2	45	30
2	65	30
2	79	30
2	84	30
2	7	31
2	20	31
2	38	31
2	91	31
2	25	32
2	34	32
2	39	32
2	53	32
2	55	32
2	58	33
2	73	33
2	75	33
2	21	34
2	57	34
2	79	34
2	83	34
2	98	34
2	100	34
2	1	35
2	85	35
2	95	35
2	2	36
2	9	36
2	11	36
2	25	36
2	32	36
2	42	36
2	71	36
2	74	36
2	12	37
2	80	37
2	82	37
2	10	38
2	11	38
2	21	38
2	98	38
2	100	38
2	18	39
2	23	39
2	24	39
2	78	39
2	2	40
2	8	40
2	9	40
2	23	40
2	29	40
2	70	40
2	40	41
2	42	41
2	86	41
2	90	41
2	100	41
2	46	42
2	8	43
2	27	43
2	69	43
2	17	44
2	22	44
2	43	44
2	59	44
2	77	44
2	10	45
2	23	45
2	51	45
2	53	45
2	64	45
2	71	45
2	77	45
2	82	45
2	3	46
2	36	46
2	95	46
2	97	46
2	46	47
2	73	47
2	1	48
2	16	48
2	26	48
2	38	48
2	56	48
2	65	48
2	66	48
2	5	49
2	12	50
2	13	50
2	84	50
2	86	50
2	98	50
2	15	51
2	52	51
2	61	51
2	69	51
2	12	52
2	18	52
2	22	52
2	53	52
2	80	52
2	7	53
2	58	53
2	61	53
2	63	53
2	75	53
2	86	53
2	89	53
2	99	53
2	17	54
2	18	54
2	23	54
2	34	54
2	39	54
2	49	54
2	71	54
2	76	54
2	81	54
2	15	55
2	25	55
2	60	56
2	9	57
2	36	57
2	45	57
2	51	57
2	64	57
2	77	57
2	1	58
2	24	58
2	30	58
2	81	58
2	88	58
2	95	58
2	99	58
2	27	59
2	65	59
2	93	59
2	2	60
2	15	60
2	17	60
2	34	60
2	10	61
2	36	61
2	50	61
2	57	61
2	91	61
2	96	61
2	26	62
2	34	62
2	48	62
2	77	62
2	8	63
2	18	63
2	48	63
2	60	63
2	76	63
2	96	63
2	21	64
2	65	64
2	68	64
2	72	64
2	93	64
2	13	65
2	33	65
2	45	65
2	59	65
2	76	65
2	3	66
2	10	66
2	33	66
2	79	66
2	17	67
2	74	67
2	79	67
2	11	68
2	59	68
2	61	68
2	65	68
2	4	69
2	16	69
2	18	69
2	19	69
2	34	69
2	44	69
2	81	69
2	90	69
2	94	69
2	25	70
2	31	70
2	42	70
2	76	70
2	41	71
2	46	71
2	80	71
2	88	71
2	94	71
2	50	72
2	84	72
2	88	72
2	96	72
2	99	72
2	48	73
2	61	73
2	88	73
2	18	74
2	50	74
2	62	74
2	1	75
2	5	75
2	7	75
2	14	75
2	35	75
2	36	75
2	42	75
2	49	75
2	59	75
2	92	75
2	29	76
2	34	76
2	85	76
2	100	76
2	14	77
2	34	77
2	85	77
2	100	77
2	2	78
2	58	78
2	64	78
2	74	78
2	79	78
2	7	79
2	71	79
2	88	79
2	93	79
2	96	79
2	4	80
2	10	80
2	24	80
2	34	80
2	42	80
2	52	80
2	70	80
2	74	80
2	88	80
2	95	80
2	5	81
2	6	81
2	43	81
2	71	81
2	100	81
2	8	82
2	74	82
2	80	82
2	89	82
2	94	82
2	97	82
2	17	83
2	23	83
2	80	83
2	38	84
2	64	84
2	81	84
2	13	85
2	15	85
2	24	85
2	39	85
2	51	85
2	57	85
2	68	85
2	88	85
2	2	86
2	61	86
2	83	86
2	95	86
2	97	86
2	3	87
2	8	87
2	11	87
2	22	87
2	23	87
2	72	87
2	73	87
2	78	87
2	91	87
2	15	88
2	55	88
2	61	88
2	69	88
2	6	89
2	9	89
2	13	89
2	18	89
2	66	89
2	92	89
2	82	90
2	6	91
2	27	91
2	48	91
2	52	91
2	67	91
2	89	91
2	10	92
2	24	92
2	25	92
2	48	92
2	57	92
2	76	92
2	84	92
2	27	93
2	29	93
2	34	93
2	69	93
2	72	93
2	84	93
2	87	93
2	12	94
2	29	94
2	32	94
2	35	94
2	12	95
2	43	95
2	60	95
2	76	95
2	83	95
2	87	95
2	65	96
2	81	96
2	89	96
2	9	97
2	38	97
2	39	97
2	61	97
2	77	97
2	82	97
2	27	98
2	30	98
2	33	98
2	72	98
2	7	99
2	8	99
2	22	99
2	50	99
2	59	99
2	73	99
2	74	99
2	32	100
2	36	100
2	55	100
2	63	100
2	71	100
2	76	100
2	80	100
2	98	100
3	30	1
3	53	1
3	59	1
3	31	2
3	33	2
3	38	2
3	50	2
3	60	2
3	66	2
3	83	2
3	97	2
3	33	3
3	45	3
3	49	3
3	83	3
3	21	4
3	25	4
3	27	4
3	39	4
3	44	4
3	66	4
3	1	5
3	24	5
3	49	5
3	16	6
3	31	6
3	35	6
3	58	6
3	59	6
3	76	6
3	95	6
3	1	7
3	2	7
3	4	7
3	30	7
3	33	7
3	61	7
3	84	7
3	15	8
3	44	8
3	63	8
3	3	9
3	53	9
3	57	9
3	90	9
3	98	9
3	26	10
3	45	10
3	47	10
3	60	10
3	68	10
3	14	11
3	46	11
3	68	11
3	34	12
3	55	12
3	60	12
3	61	12
3	65	12
3	100	12
3	53	13
3	79	13
3	86	13
3	94	13
3	18	14
3	51	14
3	65	14
3	76	14
3	77	14
3	25	15
3	32	15
3	69	15
3	93	15
3	4	16
3	12	16
3	30	16
3	31	16
3	34	16
3	37	16
3	44	16
3	38	17
3	39	17
3	58	17
3	82	17
3	32	18
3	75	18
3	12	19
3	25	20
3	31	20
3	52	20
3	6	21
3	42	21
3	56	21
3	60	21
3	64	21
3	80	21
3	88	21
3	46	22
3	50	22
3	51	22
3	57	22
3	73	22
3	94	22
3	1	23
3	6	23
3	22	23
3	28	23
3	30	23
3	41	23
3	61	23
3	72	23
3	85	23
3	24	24
3	59	24
3	90	24
3	12	25
3	17	25
3	20	25
3	25	25
3	45	25
3	51	25
3	77	25
3	23	26
3	25	26
3	33	26
3	39	26
3	72	26
3	86	26
3	10	27
3	14	27
3	26	27
3	36	27
3	46	27
3	57	27
3	59	27
3	61	27
3	67	27
3	76	27
3	86	27
3	8	28
3	30	28
3	31	28
3	33	28
3	56	28
3	1	29
3	13	29
3	83	29
3	93	29
3	12	30
3	62	30
3	73	30
3	18	31
3	37	31
3	53	31
3	64	31
3	37	32
3	18	33
3	39	33
3	47	33
3	77	33
3	82	33
3	92	33
3	1	34
3	17	34
3	28	34
3	23	35
3	28	35
3	68	35
3	74	35
3	80	35
3	100	35
3	1	36
3	7	36
3	22	36
3	37	36
3	50	36
3	71	36
3	73	36
3	79	36
3	1	37
3	5	37
3	10	37
3	24	37
3	40	37
3	78	37
3	91	37
3	97	37
3	18	38
3	25	38
3	53	38
3	92	38
3	3	39
3	82	39
3	84	39
3	65	40
3	67	40
3	71	40
3	94	40
3	95	40
3	98	40
3	45	41
3	63	41
3	1	42
3	10	42
3	13	42
3	26	42
3	53	42
3	56	42
3	63	42
3	78	42
3	3	43
3	6	43
3	47	43
3	92	43
3	25	44
3	77	44
3	78	44
3	98	44
3	36	45
3	48	45
3	50	45
3	47	46
3	65	46
3	68	46
3	27	47
3	76	47
3	88	47
3	89	47
3	1	48
3	26	48
3	27	48
3	31	48
3	33	48
3	59	48
3	72	48
3	19	49
3	92	49
3	4	50
3	29	50
3	33	50
3	42	50
3	77	50
3	85	50
3	8	51
3	10	51
3	2	52
3	29	52
3	34	52
3	54	52
3	55	52
3	61	52
3	74	52
3	36	53
3	58	53
3	77	53
3	81	53
3	96	53
3	1	54
3	23	54
3	26	54
3	46	54
3	83	54
3	91	54
3	37	55
3	58	55
3	83	55
3	22	56
3	32	56
3	42	56
3	55	56
3	62	56
3	83	56
3	4	57
3	14	57
3	61	57
3	78	57
3	91	57
3	27	58
3	45	58
3	49	58
3	58	58
3	7	59
3	16	59
3	29	59
3	41	59
3	48	59
3	49	59
3	82	59
3	12	60
3	70	60
3	78	60
3	81	60
3	97	60
3	4	61
3	86	61
3	14	62
3	3	63
3	6	63
3	32	63
3	38	63
3	43	63
3	20	64
3	50	64
3	4	65
3	51	65
3	16	66
3	47	66
3	51	66
3	81	66
3	27	67
3	51	67
3	88	67
3	4	68
3	8	68
3	23	68
3	34	68
3	38	68
3	64	68
3	49	69
3	70	69
3	91	69
3	6	70
3	25	70
3	70	70
3	78	70
3	82	70
3	83	70
3	88	70
3	97	70
3	26	71
3	56	71
3	62	71
3	81	71
3	99	71
3	20	72
3	95	72
3	17	73
3	30	73
3	46	73
3	68	73
3	88	73
3	95	73
3	21	74
3	68	74
3	75	74
3	81	74
3	92	74
3	95	74
3	8	75
3	12	75
3	13	75
3	34	75
3	42	75
3	99	75
3	23	76
3	34	76
3	42	76
3	79	76
3	84	76
3	95	76
3	14	77
3	38	77
3	40	77
3	41	77
3	90	77
3	100	77
3	38	78
3	47	78
3	49	78
3	70	78
3	79	78
3	83	78
3	94	78
3	18	79
3	99	79
3	7	80
3	8	80
3	31	80
3	68	80
3	90	80
3	4	81
3	6	81
3	20	81
3	35	81
3	54	81
3	80	81
3	85	81
3	43	82
3	64	82
3	74	82
3	17	83
3	18	83
3	43	83
3	53	83
3	57	83
3	96	83
3	98	83
3	22	84
3	65	84
3	81	84
3	28	85
3	32	85
3	35	85
3	39	85
3	81	85
3	48	86
3	16	87
3	18	87
3	31	87
3	62	87
3	97	87
3	17	88
3	52	88
3	61	88
3	77	88
3	79	88
3	88	88
3	4	89
3	43	89
3	57	89
3	97	89
3	22	90
3	30	90
3	56	90
3	66	90
3	5	91
3	40	91
3	55	91
3	68	91
3	81	91
3	16	92
3	24	92
3	40	92
3	54	92
3	61	92
3	71	92
3	82	92
3	87	92
3	15	93
3	18	93
3	85	93
3	4	94
3	15	94
3	29	94
3	32	94
3	17	95
3	27	95
3	50	95
3	75	95
3	18	96
3	23	96
3	29	96
3	40	96
3	47	96
3	92	96
3	24	97
3	49	97
3	67	97
3	70	97
3	75	97
3	81	97
3	16	98
3	40	98
3	58	98
3	59	98
3	81	99
3	91	99
3	54	100
3	74	100
3	78	100
3	92	100

[truncated: 91 more sheets: Sheet10, Sheet11, Sheet12, Sheet13, Sheet14, Sheet15, Sheet16, Sheet17, Sheet18, Sheet19, Sheet20, Sheet21, Sheet22, Sheet23, Sheet24, Sheet25, Sheet26, Sheet27, Sheet28, Sheet29 …]
