# Supplementary material for: Dissecting multilayer cell–cell communications with signaling feedback loops from spatial transcriptomics data
Source: HighWire-hosted journal article supplement (doi:10.1101/gr.279857.124), 2025-04-22
Supplement: Supplemental_Table_S9.xlsx [file Supplemental_Table_S9.xlsx]

## Sheet: Table S9 - README
Sheet1	The spatial coordinates of 100 groups of data in simulation dataset 2-group 1
Sheet2	The spatial coordinates of 100 groups of data in simulation dataset 2-group 2
Sheet3	The spatial coordinates of 100 groups of data in simulation dataset 2-group 3
Sheet4	The spatial coordinates of 100 groups of data in simulation dataset 2-group 4
Sheet5	The spatial coordinates of 100 groups of data in simulation dataset 2-group 5
Sheet6	The spatial coordinates of 100 groups of data in simulation dataset 2-group 6
Sheet7	The spatial coordinates of 100 groups of data in simulation dataset 2-group 7
Sheet8	The spatial coordinates of 100 groups of data in simulation dataset 2-group 8
Sheet9	The spatial coordinates of 100 groups of data in simulation dataset 2-group 9
Sheet10	The spatial coordinates of 100 groups of data in simulation dataset 2-group 10
Sheet11	The spatial coordinates of 100 groups of data in simulation dataset 2-group 11
Sheet12	The spatial coordinates of 100 groups of data in simulation dataset 2-group 12
Sheet13	The spatial coordinates of 100 groups of data in simulation dataset 2-group 13
Sheet14	The spatial coordinates of 100 groups of data in simulation dataset 2-group 14
Sheet15	The spatial coordinates of 100 groups of data in simulation dataset 2-group 15
Sheet16	The spatial coordinates of 100 groups of data in simulation dataset 2-group 16
Sheet17	The spatial coordinates of 100 groups of data in simulation dataset 2-group 17
Sheet18	The spatial coordinates of 100 groups of data in simulation dataset 2-group 18
Sheet19	The spatial coordinates of 100 groups of data in simulation dataset 2-group 19
Sheet20	The spatial coordinates of 100 groups of data in simulation dataset 2-group 20
Sheet21	The spatial coordinates of 100 groups of data in simulation dataset 2-group 21
Sheet22	The spatial coordinates of 100 groups of data in simulation dataset 2-group 22
Sheet23	The spatial coordinates of 100 groups of data in simulation dataset 2-group 23
Sheet24	The spatial coordinates of 100 groups of data in simulation dataset 2-group 24
Sheet25	The spatial coordinates of 100 groups of data in simulation dataset 2-group 25
Sheet26	The spatial coordinates of 100 groups of data in simulation dataset 2-group 26
Sheet27	The spatial coordinates of 100 groups of data in simulation dataset 2-group 27
Sheet28	The spatial coordinates of 100 groups of data in simulation dataset 2-group 28
Sheet29	The spatial coordinates of 100 groups of data in simulation dataset 2-group 29
Sheet30	The spatial coordinates of 100 groups of data in simulation dataset 2-group 30
Sheet31	The spatial coordinates of 100 groups of data in simulation dataset 2-group 31
Sheet32	The spatial coordinates of 100 groups of data in simulation dataset 2-group 32
Sheet33	The spatial coordinates of 100 groups of data in simulation dataset 2-group 33
Sheet34	The spatial coordinates of 100 groups of data in simulation dataset 2-group 34
Sheet35	The spatial coordinates of 100 groups of data in simulation dataset 2-group 35
Sheet36	The spatial coordinates of 100 groups of data in simulation dataset 2-group 36
Sheet37	The spatial coordinates of 100 groups of data in simulation dataset 2-group 37
Sheet38	The spatial coordinates of 100 groups of data in simulation dataset 2-group 38
Sheet39	The spatial coordinates of 100 groups of data in simulation dataset 2-group 39
Sheet40	The spatial coordinates of 100 groups of data in simulation dataset 2-group 40
Sheet41	The spatial coordinates of 100 groups of data in simulation dataset 2-group 41
Sheet42	The spatial coordinates of 100 groups of data in simulation dataset 2-group 42
Sheet43	The spatial coordinates of 100 groups of data in simulation dataset 2-group 43
Sheet44	The spatial coordinates of 100 groups of data in simulation dataset 2-group 44
Sheet45	The spatial coordinates of 100 groups of data in simulation dataset 2-group 45
Sheet46	The spatial coordinates of 100 groups of data in simulation dataset 2-group 46
Sheet47	The spatial coordinates of 100 groups of data in simulation dataset 2-group 47
Sheet48	The spatial coordinates of 100 groups of data in simulation dataset 2-group 48
Sheet49	The spatial coordinates of 100 groups of data in simulation dataset 2-group 49
Sheet50	The spatial coordinates of 100 groups of data in simulation dataset 2-group 50
Sheet51	The spatial coordinates of 100 groups of data in simulation dataset 2-group 51
Sheet52	The spatial coordinates of 100 groups of data in simulation dataset 2-group 52
Sheet53	The spatial coordinates of 100 groups of data in simulation dataset 2-group 53
Sheet54	The spatial coordinates of 100 groups of data in simulation dataset 2-group 54
Sheet55	The spatial coordinates of 100 groups of data in simulation dataset 2-group 55
Sheet56	The spatial coordinates of 100 groups of data in simulation dataset 2-group 56
Sheet57	The spatial coordinates of 100 groups of data in simulation dataset 2-group 57
Sheet58	The spatial coordinates of 100 groups of data in simulation dataset 2-group 58
Sheet59	The spatial coordinates of 100 groups of data in simulation dataset 2-group 59
Sheet60	The spatial coordinates of 100 groups of data in simulation dataset 2-group 60
Sheet61	The spatial coordinates of 100 groups of data in simulation dataset 2-group 61
Sheet62	The spatial coordinates of 100 groups of data in simulation dataset 2-group 62
Sheet63	The spatial coordinates of 100 groups of data in simulation dataset 2-group 63
Sheet64	The spatial coordinates of 100 groups of data in simulation dataset 2-group 64
Sheet65	The spatial coordinates of 100 groups of data in simulation dataset 2-group 65
Sheet66	The spatial coordinates of 100 groups of data in simulation dataset 2-group 66
Sheet67	The spatial coordinates of 100 groups of data in simulation dataset 2-group 67
Sheet68	The spatial coordinates of 100 groups of data in simulation dataset 2-group 68
Sheet69	The spatial coordinates of 100 groups of data in simulation dataset 2-group 69
Sheet70	The spatial coordinates of 100 groups of data in simulation dataset 2-group 70
Sheet71	The spatial coordinates of 100 groups of data in simulation dataset 2-group 71
Sheet72	The spatial coordinates of 100 groups of data in simulation dataset 2-group 72
Sheet73	The spatial coordinates of 100 groups of data in simulation dataset 2-group 73
Sheet74	The spatial coordinates of 100 groups of data in simulation dataset 2-group 74
Sheet75	The spatial coordinates of 100 groups of data in simulation dataset 2-group 75
Sheet76	The spatial coordinates of 100 groups of data in simulation dataset 2-group 76
Sheet77	The spatial coordinates of 100 groups of data in simulation dataset 2-group 77
Sheet78	The spatial coordinates of 100 groups of data in simulation dataset 2-group 78
Sheet79	The spatial coordinates of 100 groups of data in simulation dataset 2-group 79
Sheet80	The spatial coordinates of 100 groups of data in simulation dataset 2-group 80
Sheet81	The spatial coordinates of 100 groups of data in simulation dataset 2-group 81
Sheet82	The spatial coordinates of 100 groups of data in simulation dataset 2-group 82
Sheet83	The spatial coordinates of 100 groups of data in simulation dataset 2-group 83
Sheet84	The spatial coordinates of 100 groups of data in simulation dataset 2-group 84
Sheet85	The spatial coordinates of 100 groups of data in simulation dataset 2-group 85
Sheet86	The spatial coordinates of 100 groups of data in simulation dataset 2-group 86
Sheet87	The spatial coordinates of 100 groups of data in simulation dataset 2-group 87
Sheet88	The spatial coordinates of 100 groups of data in simulation dataset 2-group 88
Sheet89	The spatial coordinates of 100 groups of data in simulation dataset 2-group 89
Sheet90	The spatial coordinates of 100 groups of data in simulation dataset 2-group 90
Sheet91	The spatial coordinates of 100 groups of data in simulation dataset 2-group 91
Sheet92	The spatial coordinates of 100 groups of data in simulation dataset 2-group 92
Sheet93	The spatial coordinates of 100 groups of data in simulation dataset 2-group 93
Sheet94	The spatial coordinates of 100 groups of data in simulation dataset 2-group 94
Sheet95	The spatial coordinates of 100 groups of data in simulation dataset 2-group 95
Sheet96	The spatial coordinates of 100 groups of data in simulation dataset 2-group 96
Sheet97	The spatial coordinates of 100 groups of data in simulation dataset 2-group 97
Sheet98	The spatial coordinates of 100 groups of data in simulation dataset 2-group 98
Sheet99	The spatial coordinates of 100 groups of data in simulation dataset 2-group 99
Sheet100	The spatial coordinates of 100 groups of data in simulation dataset 2-group 100

## Sheet: Sheet1
1	54	6
1	57	6
1	60	8
1	66	9
1	61	10
1	34	11
1	42	11
1	51	12
1	34	13
1	49	13
1	70	14
1	72	14
1	47	15
1	62	15
1	73	15
1	32	16
1	38	16
1	60	16
1	79	16
1	25	17
1	44	17
1	53	17
1	55	17
1	59	17
1	75	18
1	27	19
1	58	19
1	65	19
1	24	20
1	31	20
1	32	20
1	74	20
1	81	20
1	29	21
1	37	21
1	48	21
1	52	21
1	64	21
1	43	22
1	47	22
1	49	22
1	56	22
1	79	22
1	81	22
1	82	22
1	20	24
1	44	24
1	48	24
1	75	24
1	21	25
1	25	25
1	32	25
1	76	25
1	17	26
1	42	26
1	44	26
1	61	26
1	73	26
1	74	26
1	80	26
1	15	27
1	19	27
1	42	27
1	32	28
1	47	28
1	69	28
1	79	28
1	32	29
1	39	29
1	44	29
1	63	29
1	39	30
1	41	30
1	49	30
1	58	30
1	80	31
1	86	31
1	71	32
1	10	33
1	15	33
1	70	33
1	86	33
1	62	34
1	78	34
1	85	34
1	10	35
1	16	35
1	53	35
1	77	35
1	86	35
1	91	35
1	18	36
1	23	36
1	31	36
1	44	36
1	48	36
1	12	37
1	20	37
1	46	37
1	48	37
1	51	37
1	56	37
1	61	37
1	88	37
1	64	38
1	35	39
1	72	39
1	31	40
1	38	40
1	58	40
1	60	40
1	88	40
1	10	41
1	15	41
1	75	41
1	85	41
1	89	41
1	15	42
1	65	42
1	41	43
1	74	43
1	87	43
1	88	43
1	93	43
1	71	44
1	93	44
1	8	45
1	16	45
1	32	45
1	38	45
1	51	45
1	56	45
1	63	45
1	46	46
1	57	46
1	69	46
1	84	46
1	6	47
1	62	47
1	23	48
1	32	48
1	34	48
1	48	48
1	53	48
1	74	48
1	82	48
1	93	48
1	34	49
1	41	49
1	84	49
1	91	49
1	49	50
1	55	50
1	59	50
1	79	50
1	7	51
1	24	51
1	44	51
1	47	51
1	57	51
1	84	51
1	93	51
1	40	52
1	44	52
1	58	52
1	76	52
1	11	53
1	23	53
1	58	53
1	32	54
1	34	54
1	44	54
1	48	54
1	62	54
1	63	54
1	64	54
1	67	54
1	77	54
1	7	55
1	46	55
1	75	55
1	79	55
1	16	56
1	45	56
1	66	57
1	78	57
1	33	58
1	53	58
1	73	58
1	75	58
1	6	59
1	14	59
1	20	59
1	37	59
1	51	59
1	65	59
1	89	59
1	23	60
1	28	61
1	55	61
1	72	61
1	76	61
1	33	62
1	44	62
1	53	62
1	55	62
1	56	62
1	82	62
1	35	63
1	38	63
1	42	63
1	45	63
1	87	63
1	14	64
1	17	64
1	27	64
1	32	64
1	73	64
1	91	64
1	21	65
1	32	65
1	65	65
1	69	65
1	73	65
1	74	65
1	85	65
1	19	66
1	20	66
1	28	66
1	51	66
1	26	67
1	69	67
1	76	67
1	13	68
1	22	68
1	79	68
1	80	68
1	36	69
1	49	69
1	53	69
1	60	69
1	19	70
1	48	70
1	66	70
1	29	71
1	62	71
1	76	71
1	36	72
1	37	72
1	51	72
1	22	73
1	37	73
1	38	73
1	39	73
1	49	73
1	57	73
1	80	73
1	46	74
1	48	74
1	65	74
1	67	74
1	80	74
1	79	75
1	80	75
1	18	76
1	65	76
1	78	76
1	81	76
1	24	77
1	67	77
1	80	77
1	18	78
1	21	78
1	36	78
1	43	78
1	52	78
1	62	78
1	65	78
1	38	79
1	24	80
1	49	80
1	25	81
1	35	81
1	70	81
1	41	82
1	52	82
1	72	82
1	21	83
1	29	83
1	37	83
1	39	83
1	74	83
1	36	84
1	78	84
1	36	85
1	54	85
1	66	85
1	65	86
1	73	86
1	77	86
1	27	87
1	35	87
1	38	87
1	54	87
1	60	87
1	69	87
1	41	88
1	48	88
1	72	88
1	41	89
1	62	90
1	68	90
1	55	91
1	57	93
1	61	93
2	15	2
2	27	2
2	45	2
2	59	2
2	94	2
2	98	2
2	18	4
2	26	4
2	35	4
2	49	4
2	63	4
2	67	4
2	1	6
2	20	6
2	85	6
2	22	7
2	62	7
2	2	8
2	6	8
2	19	8
2	40	8
2	64	8
2	14	9
2	35	9
2	87	9
2	94	9
2	11	10
2	15	11
2	32	12
2	47	12
2	54	12
2	87	12
2	17	13
2	76	13
2	91	13
2	13	14
2	47	14
2	57	14
2	68	14
2	75	14
2	76	14
2	15	15
2	38	15
2	4	16
2	47	16
2	17	18
2	29	18
2	58	18
2	70	18
2	73	18
2	5	19
2	23	19
2	76	19
2	16	20
2	55	20
2	76	20
2	85	20
2	13	21
2	17	21
2	23	21
2	48	21
2	95	21
2	29	22
2	34	22
2	17	23
2	41	23
2	49	23
2	53	23
2	60	23
2	20	24
2	42	24
2	43	24
2	33	25
2	90	25
2	92	25
2	34	26
2	56	26
2	76	26
2	90	26
2	92	26
2	98	26
2	100	26
2	8	27
2	44	27
2	45	27
2	54	27
2	86	27
2	95	27
2	50	31
2	68	31
2	3	32
2	13	32
2	23	32
2	46	32
2	31	33
2	37	33
2	57	33
2	61	33
2	77	33
2	10	34
2	92	34
2	97	34
2	2	35
2	6	36
2	55	36
2	72	36
2	76	36
2	87	36
2	3	37
2	59	38
2	40	39
2	46	39
2	56	39
2	1	40
2	14	40
2	18	40
2	35	40
2	83	40
2	62	41
2	80	41
2	26	42
2	49	42
2	52	42
2	65	42
2	20	43
2	29	43
2	60	43
2	13	44
2	32	45
2	83	45
2	85	45
2	68	46
2	85	46
2	17	48
2	38	48
2	10	49
2	50	49
2	71	49
2	76	49
2	77	49
2	91	49
2	99	49
2	2	50
2	8	50
2	21	50
2	17	51
2	7	52
2	38	52
2	40	52
2	46	52
2	52	52
2	58	52
2	97	52
2	13	53
2	90	53
2	12	54
2	52	54
2	3	55
2	93	55
2	67	56
2	91	56
2	17	57
2	46	57
2	90	57
2	23	59
2	24	59
2	34	59
2	41	59
2	11	60
2	46	60
2	71	60
2	98	60
2	76	61
2	58	62
2	60	62
2	69	62
2	29	63
2	54	63
2	20	64
2	66	64
2	17	65
2	38	65
2	79	65
2	34	66
2	13	67
2	36	67
2	51	67
2	58	68
2	68	68
2	93	68
2	8	69
2	14	69
2	27	69
2	30	69
2	32	69
2	56	69
2	6	70
2	28	70
2	36	70
2	97	70
2	11	71
2	26	71
2	61	71
2	91	71
2	97	71
2	4	72
2	14	72
2	42	72
2	97	72
2	29	73
2	65	73
2	70	73
2	86	73
2	93	73
2	32	74
2	37	75
2	43	75
2	94	75
2	22	76
2	46	76
2	50	76
2	36	77
2	49	77
2	51	77
2	56	77
2	61	77
2	64	77
2	1	78
2	33	78
2	23	79
2	52	79
2	61	79
2	65	79
2	94	79
2	48	81
2	57	81
2	60	81
2	64	81
2	5	82
2	16	82
2	38	82
2	89	82
2	60	83
2	74	83
2	27	84
2	58	84
2	86	84
2	2	85
2	29	85
2	45	86
2	51	86
2	91	86
2	8	87
2	24	87
2	40	87
2	57	88
2	64	88
2	75	88
2	79	88
2	10	89
2	16	89
2	86	89
2	90	89
2	24	90
2	40	91
2	61	91
2	89	91
2	5	92
2	7	92
2	59	92
2	75	92
2	77	92
2	18	93
2	40	93
2	47	93
2	76	93
2	77	93
2	79	93
2	36	94
2	44	94
2	52	94
2	86	94
2	45	95
2	50	96
2	89	96
2	97	96
2	4	97
2	15	97
2	42	97
2	43	97
2	76	97
2	78	97
2	39	98
2	46	98
2	49	98
2	59	98
2	94	98
2	70	99
2	74	99
2	75	99
2	91	99
2	10	100
2	71	100
2	79	100
2	95	100
3	54	7
3	52	9
3	48	10
3	49	10
3	70	10
3	30	11
3	49	12
3	59	12
3	39	13
3	36	14
3	45	14
3	42	15
3	71	15
3	33	16
3	46	17
3	62	17
3	33	18
3	37	18
3	45	18
3	55	18
3	71	18
3	76	18
3	80	18
3	61	20
3	70	20
3	44	21
3	47	21
3	49	21
3	71	21
3	16	22
3	49	22
3	36	23
3	37	23
3	42	23
3	46	23
3	48	23
3	52	23
3	68	23
3	78	23
3	85	23
3	31	24
3	40	24
3	73	24
3	37	25
3	45	25
3	30	26
3	31	26
3	44	26
3	56	26
3	57	26
3	60	26
3	40	27
3	76	27
3	80	27
3	14	28
3	70	28
3	84	28
3	20	29
3	24	29
3	34	29
3	38	29
3	11	30
3	28	30
3	48	30
3	54	30
3	87	30
3	10	31
3	20	31
3	29	31
3	30	31
3	43	31
3	54	31
3	77	31
3	18	32
3	42	32
3	43	32
3	48	32
3	54	32
3	69	32
3	73	32
3	87	32
3	53	33
3	58	33
3	63	33
3	85	33
3	19	34
3	29	34
3	30	34
3	32	34
3	41	34
3	44	34
3	61	34
3	78	34
3	80	34
3	87	34
3	15	35
3	42	35
3	43	35
3	87	35
3	89	35
3	18	36
3	27	36
3	50	36
3	84	36
3	47	37
3	74	37
3	77	37
3	9	38
3	45	38
3	60	38
3	25	39
3	79	39
3	82	39
3	8	40
3	13	40
3	29	40
3	34	40
3	54	40
3	67	40
3	68	40
3	25	41
3	50	41
3	75	41
3	10	42
3	14	42
3	79	42
3	81	42
3	8	43
3	44	43
3	61	43
3	67	43
3	73	43
3	87	43
3	32	44
3	38	44
3	61	44
3	74	44
3	47	45
3	14	46
3	38	46
3	7	47
3	17	47
3	14	48
3	64	48
3	68	48
3	71	48
3	94	48
3	30	49
3	39	49
3	42	49
3	84	49
3	8	50
3	25	50
3	54	50
3	95	50
3	24	51
3	63	51
3	81	51
3	82	51
3	20	52
3	49	52
3	51	52
3	57	52
3	79	52
3	16	53
3	18	53
3	27	53
3	52	53
3	30	54
3	39	54
3	59	54
3	82	54
3	84	54
3	66	55
3	85	55
3	88	55
3	16	56
3	21	56
3	29	56
3	68	56
3	45	57
3	52	57
3	69	57
3	10	58
3	18	58
3	24	58
3	42	58
3	67	58
3	9	59
3	37	59
3	46	59
3	87	59
3	90	59
3	31	60
3	74	60
3	50	61
3	57	61
3	63	61
3	47	62
3	49	62
3	45	63
3	14	64
3	11	65
3	29	65
3	30	65
3	39	65
3	40	65
3	50	65
3	51	65
3	68	65
3	36	66
3	41	66
3	72	66
3	91	66
3	13	67
3	58	67
3	75	67
3	57	68
3	68	68
3	15	69
3	40	69
3	61	69
3	81	69
3	21	70
3	32	71
3	69	71
3	83	71
3	89	71
3	17	72
3	70	72
3	40	73
3	46	73
3	71	73
3	78	73
3	23	74
3	41	74
3	43	74
3	74	74
3	87	74
3	58	75
3	14	76
3	22	76
3	32	76
3	36	76
3	56	76
3	62	76
3	78	76
3	24	77
3	33	77
3	34	77
3	45	77
3	70	77
3	17	78
3	31	78
3	35	78
3	61	78
3	40	79
3	59	79
3	30	80
3	43	80
3	53	80
3	82	80
3	62	81
3	69	81
3	79	81
3	65	82
3	72	82
3	47	83
3	52	83
3	36	84
3	71	84
3	75	84
3	32	85
3	56	85
3	26	86
3	72	86
3	31	87
3	69	87
3	31	88
3	53	88
3	43	89
3	55	89
3	57	89
3	69	89
3	33	90
3	65	90
3	56	91
3	48	92
3	51	93

## Sheet: Sheet2
1	51	6
1	59	7
1	60	7
1	63	7
1	38	9
1	42	9
1	48	9
1	60	9
1	56	11
1	62	11
1	40	12
1	26	13
1	28	13
1	33	13
1	42	13
1	41	14
1	29	15
1	61	15
1	27	16
1	33	16
1	76	16
1	24	17
1	25	17
1	62	17
1	67	17
1	56	18
1	57	18
1	35	19
1	39	19
1	47	19
1	64	19
1	79	19
1	26	20
1	29	20
1	25	21
1	41	21
1	53	21
1	57	21
1	74	21
1	24	22
1	34	22
1	51	22
1	52	22
1	67	22
1	64	23
1	67	23
1	83	23
1	33	24
1	49	24
1	53	24
1	17	25
1	59	25
1	81	25
1	40	26
1	51	26
1	81	26
1	21	27
1	84	27
1	86	27
1	23	28
1	44	28
1	50	28
1	53	28
1	59	28
1	75	28
1	80	28
1	83	28
1	12	29
1	54	29
1	85	29
1	14	30
1	24	30
1	85	30
1	61	31
1	68	31
1	9	32
1	13	32
1	36	32
1	39	32
1	74	32
1	62	33
1	88	33
1	24	34
1	34	34
1	52	34
1	70	34
1	86	34
1	88	34
1	57	35
1	41	36
1	63	36
1	64	36
1	74	36
1	8	37
1	26	37
1	37	37
1	41	37
1	44	37
1	45	37
1	11	38
1	12	38
1	17	38
1	29	38
1	51	38
1	52	38
1	80	38
1	29	39
1	39	39
1	54	39
1	84	39
1	90	39
1	57	40
1	89	40
1	33	41
1	55	41
1	60	41
1	73	41
1	79	41
1	87	41
1	18	42
1	46	42
1	55	42
1	67	42
1	73	42
1	17	43
1	50	43
1	51	43
1	54	43
1	58	43
1	68	43
1	17	44
1	19	44
1	38	44
1	62	44
1	85	44
1	94	44
1	7	45
1	12	45
1	16	45
1	25	45
1	72	45
1	77	45
1	51	46
1	58	46
1	64	46
1	77	46
1	79	46
1	13	47
1	21	47
1	22	47
1	31	47
1	39	47
1	46	47
1	67	47
1	70	47
1	75	47
1	85	47
1	88	47
1	17	48
1	66	48
1	84	48
1	35	49
1	37	49
1	32	50
1	46	50
1	63	50
1	71	50
1	23	51
1	26	51
1	64	51
1	82	51
1	65	52
1	91	52
1	25	53
1	27	53
1	31	53
1	33	53
1	78	53
1	69	54
1	91	54
1	21	55
1	68	55
1	82	55
1	12	56
1	28	56
1	38	56
1	62	56
1	63	56
1	79	56
1	16	57
1	24	57
1	6	58
1	29	58
1	46	58
1	56	58
1	83	59
1	36	60
1	40	60
1	45	60
1	57	60
1	80	60
1	53	61
1	56	61
1	84	61
1	17	62
1	83	62
1	93	62
1	21	63
1	48	63
1	63	63
1	26	64
1	51	64
1	57	64
1	88	64
1	16	65
1	22	65
1	25	65
1	28	65
1	32	65
1	62	65
1	78	65
1	86	65
1	76	66
1	15	67
1	17	67
1	40	67
1	29	68
1	34	68
1	44	68
1	73	68
1	17	69
1	39	69
1	52	69
1	25	70
1	28	70
1	45	70
1	51	70
1	53	70
1	61	70
1	74	70
1	46	71
1	83	71
1	85	71
1	19	72
1	20	72
1	38	72
1	80	72
1	82	72
1	45	73
1	50	73
1	58	73
1	56	74
1	59	74
1	76	74
1	13	75
1	42	75
1	45	75
1	49	75
1	80	75
1	86	75
1	16	76
1	33	76
1	57	76
1	74	76
1	75	76
1	86	76
1	64	77
1	26	78
1	34	78
1	41	78
1	45	78
1	28	79
1	31	79
1	74	79
1	24	80
1	37	80
1	72	81
1	23	82
1	59	82
1	60	83
1	77	83
1	28	85
1	66	85
1	71	86
1	27	87
1	43	87
1	49	87
1	28	88
1	30	88
1	37	88
1	49	88
1	35	89
1	48	89
1	52	89
1	31	90
1	52	90
1	38	91
1	39	91
1	45	91
1	55	91
1	59	91
1	60	91
1	61	93
2	30	1
2	39	1
2	58	1
2	70	1
2	29	2
2	42	2
2	59	2
2	61	2
2	76	2
2	19	3
2	23	3
2	34	4
2	2	5
2	22	5
2	26	5
2	63	5
2	64	5
2	22	6
2	16	7
2	95	7
2	19	8
2	74	8
2	93	8
2	7	9
2	8	9
2	32	9
2	58	9
2	98	9
2	54	10
2	89	10
2	31	11
2	48	11
2	1	12
2	35	12
2	70	13
2	2	14
2	51	14
2	18	15
2	34	15
2	77	15
2	98	15
2	5	16
2	90	16
2	92	16
2	27	17
2	47	17
2	14	18
2	62	18
2	62	19
2	66	19
2	32	20
2	42	20
2	90	20
2	72	21
2	99	21
2	39	22
2	43	22
2	48	22
2	51	22
2	59	22
2	87	22
2	98	22
2	1	23
2	39	23
2	81	23
2	13	25
2	14	25
2	9	26
2	35	26
2	44	26
2	6	27
2	11	27
2	94	27
2	13	28
2	45	28
2	73	28
2	28	29
2	34	29
2	47	29
2	77	29
2	38	30
2	45	30
2	9	31
2	63	31
2	86	31
2	4	32
2	30	32
2	22	33
2	37	33
2	58	33
2	61	34
2	100	34
2	7	35
2	18	35
2	23	36
2	26	36
2	27	36
2	75	36
2	2	37
2	16	38
2	24	38
2	29	39
2	83	39
2	98	39
2	2	40
2	12	40
2	59	40
2	70	40
2	85	40
2	21	42
2	75	42
2	85	42
2	91	42
2	16	43
2	35	43
2	41	43
2	92	43
2	95	43
2	27	44
2	37	44
2	83	44
2	99	44
2	14	45
2	82	45
2	87	45
2	32	46
2	43	46
2	98	46
2	6	47
2	8	48
2	18	48
2	26	48
2	48	48
2	49	48
2	72	48
2	11	49
2	15	49
2	24	49
2	65	49
2	82	49
2	29	50
2	45	50
2	53	50
2	57	50
2	59	50
2	79	50
2	94	51
2	20	52
2	25	52
2	59	52
2	68	52
2	95	52
2	21	53
2	51	53
2	55	53
2	18	54
2	57	54
2	60	54
2	77	54
2	11	55
2	57	55
2	58	55
2	95	56
2	25	57
2	67	57
2	70	57
2	99	57
2	9	58
2	23	58
2	53	58
2	86	58
2	34	59
2	35	60
2	38	60
2	48	60
2	81	60
2	83	60
2	2	61
2	3	62
2	25	62
2	96	62
2	28	63
2	60	63
2	90	63
2	10	65
2	12	65
2	83	65
2	86	65
2	46	66
2	19	67
2	22	67
2	50	67
2	52	67
2	79	67
2	74	69
2	86	71
2	91	71
2	4	72
2	16	72
2	71	72
2	38	73
2	61	73
2	70	73
2	6	74
2	87	74
2	8	75
2	53	76
2	77	76
2	54	77
2	91	77
2	97	77
2	43	78
2	76	78
2	84	78
2	96	78
2	98	78
2	27	79
2	37	79
2	70	79
2	30	80
2	58	80
2	34	81
2	50	81
2	51	81
2	33	83
2	44	83
2	63	83
2	90	83
2	16	84
2	48	84
2	90	84
2	9	86
2	54	86
2	56	86
2	84	86
2	87	86
2	19	87
2	60	87
2	70	87
2	88	87
2	9	88
2	14	88
2	25	89
2	32	89
2	59	90
2	85	90
2	6	91
2	38	91
2	50	91
2	55	91
2	74	91
2	78	91
2	66	92
2	80	92
2	92	92
2	21	93
2	79	93
2	28	94
2	30	94
2	45	94
2	62	94
2	15	95
2	31	96
2	53	96
2	90	96
2	91	96
2	96	97
2	21	98
2	66	98
2	81	99
2	83	100
3	58	6
3	37	7
3	47	8
3	60	8
3	35	9
3	60	9
3	50	10
3	37	11
3	48	11
3	33	12
3	31	13
3	36	13
3	38	13
3	48	13
3	48	14
3	50	14
3	24	16
3	29	16
3	33	16
3	56	16
3	64	16
3	79	16
3	33	17
3	58	17
3	77	17
3	78	17
3	44	18
3	54	18
3	67	18
3	77	18
3	22	19
3	26	19
3	30	19
3	46	19
3	78	19
3	47	20
3	53	20
3	70	20
3	75	20
3	18	21
3	28	21
3	36	21
3	81	21
3	16	22
3	43	22
3	82	22
3	15	23
3	16	23
3	24	23
3	78	23
3	85	23
3	34	24
3	51	24
3	64	24
3	70	24
3	71	24
3	77	24
3	86	24
3	13	25
3	21	25
3	35	25
3	42	25
3	63	25
3	72	25
3	84	25
3	13	26
3	29	26
3	56	26
3	57	26
3	58	26
3	72	26
3	76	26
3	79	26
3	81	26
3	19	27
3	64	27
3	69	27
3	80	27
3	75	28
3	19	29
3	24	29
3	48	29
3	51	29
3	66	29
3	12	30
3	19	30
3	56	30
3	80	30
3	24	31
3	69	31
3	52	32
3	54	32
3	14	33
3	29	33
3	48	33
3	52	33
3	77	33
3	27	34
3	52	34
3	20	35
3	22	35
3	35	35
3	53	35
3	70	35
3	79	35
3	60	36
3	72	36
3	79	36
3	11	37
3	37	37
3	73	37
3	74	37
3	78	37
3	12	38
3	16	38
3	30	38
3	36	38
3	42	38
3	43	38
3	63	38
3	67	38
3	69	38
3	8	39
3	55	39
3	84	39
3	11	40
3	25	40
3	44	40
3	46	40
3	47	40
3	64	40
3	69	40
3	57	41
3	68	41
3	72	41
3	8	42
3	70	42
3	83	42
3	7	43
3	10	43
3	14	43
3	44	43
3	46	43
3	51	43
3	76	43
3	86	43
3	89	43
3	12	44
3	38	44
3	51	44
3	86	44
3	34	45
3	44	45
3	60	45
3	74	45
3	9	46
3	60	46
3	73	46
3	15	47
3	39	47
3	71	47
3	81	47
3	86	47
3	90	47
3	11	48
3	40	48
3	62	48
3	82	48
3	21	49
3	47	49
3	61	49
3	64	49
3	82	49
3	21	50
3	37	50
3	47	50
3	69	50
3	24	51
3	50	51
3	69	52
3	79	52
3	84	52
3	10	53
3	18	53
3	26	53
3	33	53
3	35	53
3	41	53
3	47	53
3	56	53
3	80	53
3	14	54
3	27	54
3	31	54
3	37	54
3	52	54
3	77	54
3	59	55
3	80	55
3	86	55
3	24	56
3	57	56
3	62	56
3	66	56
3	25	57
3	42	57
3	69	57
3	79	57
3	14	58
3	40	58
3	44	58
3	46	58
3	48	58
3	57	58
3	70	58
3	34	59
3	40	59
3	54	59
3	83	59
3	87	59
3	16	60
3	35	60
3	59	60
3	75	60
3	93	60
3	31	61
3	40	61
3	55	61
3	72	61
3	76	61
3	82	61
3	83	61
3	90	61
3	13	62
3	20	62
3	59	62
3	61	62
3	46	63
3	54	63
3	76	63
3	30	64
3	31	64
3	44	64
3	25	65
3	36	65
3	71	65
3	81	65
3	83	65
3	15	66
3	34	66
3	67	66
3	75	66
3	83	66
3	10	67
3	20	67
3	68	67
3	30	68
3	43	68
3	70	68
3	13	69
3	46	69
3	50	69
3	57	69
3	63	69
3	86	69
3	36	70
3	43	70
3	64	70
3	13	71
3	33	71
3	42	71
3	46	71
3	50	71
3	60	71
3	65	71
3	68	71
3	30	72
3	41	72
3	58	72
3	70	72
3	20	73
3	41	73
3	46	73
3	49	73
3	30	74
3	35	74
3	38	74
3	42	74
3	53	74
3	29	75
3	62	75
3	21	76
3	39	76
3	61	76
3	64	76
3	17	77
3	20	77
3	35	77
3	36	77
3	55	77
3	86	77
3	33	78
3	62	78
3	67	78
3	37	79
3	47	79
3	54	79
3	82	79
3	32	80
3	56	80
3	38	81
3	48	81
3	58	81
3	43	82
3	44	82
3	32	83
3	41	83
3	66	84
3	76	84
3	46	85
3	59	85
3	33	86
3	43	86
3	49	86
3	55	86
3	59	86
3	68	86
3	72	87
3	73	87
3	45	88
3	62	88
3	72	88
3	52	89
3	43	90
3	56	90
3	41	91
3	57	91
3	55	92
3	40	93
3	55	93

## Sheet: Sheet3
1	61	7
1	34	8
1	60	8
1	53	9
1	30	10
1	45	10
1	49	11
1	59	11
1	38	13
1	47	13
1	53	13
1	27	15
1	47	15
1	54	15
1	24	16
1	27	16
1	41	16
1	46	16
1	52	16
1	37	17
1	48	17
1	56	17
1	60	18
1	74	18
1	76	18
1	48	19
1	27	20
1	37	20
1	52	20
1	55	20
1	64	20
1	66	20
1	21	21
1	31	21
1	39	21
1	54	21
1	58	21
1	20	22
1	22	22
1	28	22
1	54	22
1	62	22
1	69	22
1	70	22
1	82	22
1	35	23
1	68	23
1	85	23
1	17	24
1	69	24
1	17	25
1	22	25
1	70	25
1	13	26
1	21	26
1	32	26
1	35	26
1	52	26
1	54	26
1	63	26
1	70	26
1	88	26
1	29	27
1	53	27
1	71	27
1	16	28
1	28	28
1	56	28
1	60	28
1	61	28
1	63	28
1	64	28
1	80	28
1	88	28
1	18	29
1	63	29
1	69	29
1	71	29
1	40	30
1	51	30
1	55	30
1	80	30
1	12	31
1	22	31
1	70	31
1	71	31
1	72	31
1	11	32
1	33	32
1	71	32
1	81	32
1	83	32
1	31	33
1	45	33
1	49	33
1	8	34
1	19	34
1	54	34
1	62	34
1	89	34
1	9	35
1	26	35
1	43	35
1	51	35
1	69	35
1	85	35
1	25	36
1	76	36
1	78	36
1	88	36
1	10	38
1	15	38
1	16	39
1	19	39
1	47	39
1	58	39
1	82	39
1	15	40
1	51	40
1	63	40
1	67	40
1	70	40
1	78	40
1	15	41
1	42	41
1	49	41
1	69	41
1	70	41
1	75	41
1	37	42
1	40	42
1	54	42
1	63	42
1	81	42
1	7	43
1	15	43
1	23	43
1	43	43
1	55	43
1	94	43
1	6	44
1	62	44
1	76	44
1	84	44
1	91	44
1	50	45
1	82	45
1	85	45
1	23	46
1	27	46
1	33	46
1	40	46
1	91	46
1	18	47
1	34	47
1	38	47
1	61	47
1	62	48
1	64	48
1	77	48
1	29	49
1	30	49
1	40	49
1	51	49
1	62	49
1	76	49
1	5	50
1	37	50
1	43	50
1	56	50
1	67	50
1	81	50
1	14	51
1	27	51
1	53	51
1	66	51
1	74	51
1	84	51
1	51	52
1	90	52
1	39	53
1	50	53
1	76	53
1	77	53
1	89	53
1	46	54
1	49	54
1	69	54
1	16	55
1	53	55
1	68	55
1	80	55
1	91	55
1	59	56
1	72	56
1	76	56
1	79	56
1	9	57
1	12	57
1	21	57
1	22	57
1	29	57
1	56	57
1	58	57
1	67	57
1	13	58
1	15	58
1	25	58
1	29	58
1	34	58
1	50	58
1	74	58
1	86	58
1	25	59
1	48	59
1	52	59
1	61	59
1	22	60
1	43	60
1	52	60
1	61	60
1	63	60
1	80	60
1	88	60
1	42	61
1	56	61
1	57	61
1	73	61
1	36	62
1	37	62
1	66	62
1	74	62
1	27	63
1	85	63
1	90	63
1	8	64
1	11	64
1	18	64
1	58	65
1	70	65
1	92	65
1	15	66
1	29	66
1	51	66
1	86	66
1	11	67
1	45	67
1	46	67
1	48	67
1	68	67
1	16	68
1	21	68
1	26	68
1	42	68
1	55	68
1	58	68
1	61	68
1	77	68
1	90	68
1	34	69
1	46	69
1	52	69
1	56	69
1	10	70
1	29	70
1	43	70
1	66	70
1	70	70
1	82	70
1	23	71
1	32	71
1	45	71
1	79	71
1	54	72
1	58	72
1	80	72
1	28	73
1	29	73
1	36	73
1	45	73
1	80	73
1	88	73
1	21	74
1	67	74
1	33	75
1	64	75
1	22	76
1	32	76
1	56	76
1	65	76
1	14	77
1	50	77
1	51	77
1	52	77
1	68	77
1	82	77
1	55	78
1	58	78
1	76	78
1	22	80
1	24	80
1	28	80
1	30	80
1	59	80
1	82	80
1	57	81
1	63	81
1	72	81
1	79	81
1	38	82
1	39	82
1	54	83
1	36	84
1	52	84
1	70	84
1	38	85
1	44	85
1	24	86
1	45	87
1	50	87
1	38	88
1	50	88
1	69	88
1	74	88
1	31	90
1	50	90
1	59	90
1	46	92
1	51	92
1	56	92
1	65	92
2	12	1
2	27	1
2	66	1
2	2	2
2	35	2
2	52	2
2	71	2
2	90	2
2	96	2
2	40	3
2	47	3
2	72	3
2	35	4
2	63	4
2	29	5
2	39	5
2	95	5
2	100	5
2	43	6
2	53	6
2	91	6
2	26	7
2	36	7
2	55	7
2	58	7
2	62	7
2	72	7
2	81	7
2	39	8
2	15	9
2	26	9
2	44	9
2	58	9
2	87	9
2	25	10
2	64	10
2	51	11
2	59	11
2	68	11
2	72	11
2	98	11
2	59	12
2	60	12
2	72	12
2	75	12
2	25	13
2	45	13
2	85	13
2	3	14
2	11	14
2	44	14
2	47	14
2	1	15
2	4	15
2	32	15
2	43	15
2	48	15
2	52	15
2	53	15
2	56	16
2	90	16
2	6	17
2	11	17
2	16	17
2	23	17
2	37	17
2	5	18
2	74	19
2	89	19
2	97	20
2	92	21
2	44	22
2	13	23
2	73	23
2	8	24
2	89	24
2	91	24
2	1	25
2	28	25
2	31	25
2	66	25
2	78	25
2	7	26
2	29	26
2	90	26
2	33	27
2	47	27
2	63	27
2	72	27
2	9	28
2	74	28
2	43	29
2	91	29
2	15	30
2	30	30
2	66	30
2	26	31
2	51	31
2	82	31
2	32	32
2	45	32
2	77	32
2	26	33
2	46	33
2	18	34
2	19	34
2	37	34
2	53	34
2	70	34
2	27	35
2	47	36
2	93	37
2	11	38
2	23	38
2	34	38
2	45	38
2	69	38
2	90	38
2	40	39
2	79	39
2	87	39
2	16	40
2	58	40
2	67	40
2	3	41
2	7	41
2	22	41
2	25	41
2	69	41
2	84	41
2	9	42
2	62	42
2	18	43
2	91	43
2	48	44
2	52	44
2	2	45
2	28	45
2	66	45
2	9	46
2	39	46
2	53	47
2	59	47
2	66	47
2	71	47
2	67	48
2	72	48
2	88	48
2	90	48
2	39	49
2	44	49
2	77	49
2	66	50
2	85	50
2	7	51
2	19	51
2	20	51
2	57	51
2	59	51
2	2	52
2	37	52
2	30	53
2	52	53
2	52	54
2	9	55
2	46	55
2	64	55
2	17	56
2	28	56
2	42	56
2	65	56
2	91	56
2	28	57
2	32	57
2	38	57
2	42	57
2	68	57
2	17	58
2	52	58
2	37	59
2	45	59
2	49	59
2	71	59
2	84	59
2	2	60
2	24	60
2	30	60
2	37	60
2	61	60
2	83	60
2	28	61
2	46	61
2	99	61
2	40	62
2	52	62
2	64	62
2	71	62
2	49	63
2	71	63
2	90	63
2	16	64
2	75	64
2	95	64
2	10	65
2	32	65
2	89	65
2	10	67
2	24	67
2	62	67
2	16	68
2	46	68
2	92	68
2	1	69
2	3	69
2	18	69
2	31	69
2	61	69
2	98	69
2	99	69
2	12	70
2	18	70
2	48	70
2	50	70
2	10	71
2	22	71
2	33	71
2	48	71
2	86	71
2	93	71
2	81	72
2	5	73
2	43	73
2	8	74
2	25	74
2	35	75
2	57	75
2	64	75
2	72	75
2	80	75
2	1	76
2	94	76
2	3	77
2	19	77
2	36	77
2	59	77
2	89	78
2	92	78
2	15	79
2	54	79
2	77	79
2	32	81
2	54	81
2	62	81
2	63	81
2	17	82
2	61	82
2	11	83
2	13	83
2	42	83
2	83	83
2	93	83
2	29	84
2	33	84
2	68	84
2	72	84
2	75	84
2	76	84
2	35	86
2	54	87
2	36	89
2	37	89
2	83	89
2	7	90
2	11	90
2	9	91
2	23	91
2	41	91
2	92	91
2	14	92
2	42	92
2	82	92
2	15	93
2	19	93
2	35	93
2	58	93
2	59	93
2	60	93
2	66	93
2	90	93
2	8	94
2	37	94
2	68	94
2	90	94
2	95	94
2	23	95
2	14	96
2	49	96
2	65	96
2	96	96
2	39	97
2	76	97
2	25	98
2	30	98
2	36	98
2	56	98
2	48	99
2	68	99
2	69	99
2	74	99
2	3	100
2	9	100
2	10	100
2	19	100
2	63	100
2	73	100
2	79	100
3	47	6
3	54	6
3	39	7
3	53	7
3	58	7
3	41	8
3	40	9
3	32	10
3	40	10
3	69	10
3	49	12
3	37	13
3	38	13
3	40	13
3	65	13
3	42	14
3	74	14
3	23	15
3	43	15
3	56	15
3	64	15
3	77	15
3	21	16
3	34	16
3	79	16
3	49	17
3	51	17
3	43	18
3	56	18
3	58	18
3	68	18
3	81	18
3	32	19
3	49	19
3	50	19
3	68	20
3	72	20
3	26	21
3	57	21
3	15	22
3	46	22
3	79	22
3	16	23
3	45	23
3	64	23
3	33	24
3	46	24
3	53	24
3	55	24
3	59	24
3	50	25
3	52	25
3	57	25
3	62	25
3	68	25
3	79	25
3	85	25
3	27	26
3	30	26
3	36	26
3	57	26
3	67	26
3	36	27
3	46	27
3	61	27
3	84	27
3	17	28
3	31	28
3	67	28
3	43	29
3	66	29
3	78	30
3	15	31
3	17	31
3	45	31
3	48	31
3	69	31
3	89	31
3	32	32
3	74	32
3	40	33
3	53	33
3	61	33
3	68	33
3	85	33
3	12	34
3	26	34
3	32	34
3	78	34
3	44	35
3	58	35
3	40	36
3	56	36
3	73	36
3	11	37
3	16	37
3	53	37
3	12	38
3	44	38
3	55	38
3	77	38
3	37	39
3	42	39
3	52	39
3	78	39
3	21	40
3	17	41
3	30	41
3	31	41
3	32	41
3	81	41
3	31	42
3	46	42
3	54	42
3	68	42
3	69	42
3	10	43
3	33	43
3	43	43
3	44	43
3	54	43
3	8	44
3	20	44
3	41	44
3	55	44
3	74	44
3	84	44
3	6	45
3	12	45
3	60	45
3	65	45
3	19	46
3	32	46
3	49	46
3	50	46
3	63	46
3	68	46
3	75	46
3	39	47
3	80	47
3	14	48
3	31	48
3	52	48
3	58	48
3	9	49
3	32	49
3	38	49
3	64	49
3	72	49
3	15	50
3	22	50
3	32	50
3	50	50
3	53	50
3	64	50
3	84	50
3	6	51
3	46	51
3	58	51
3	61	51
3	62	51
3	70	51
3	85	51
3	20	52
3	21	52
3	27	52
3	45	52
3	65	52
3	90	52
3	10	53
3	29	53
3	31	53
3	37	53
3	52	53
3	15	54
3	17	54
3	25	54
3	45	54
3	53	54
3	55	54
3	77	54
3	81	54
3	21	55
3	22	55
3	39	55
3	65	55
3	92	55
3	13	56
3	19	56
3	28	56
3	45	56
3	87	56
3	38	57
3	20	58
3	32	58
3	58	58
3	72	58
3	28	59
3	34	59
3	48	59
3	62	59
3	8	60
3	29	60
3	30	60
3	67	60
3	82	60
3	30	61
3	56	61
3	70	61
3	75	61
3	55	62
3	60	62
3	65	62
3	78	62
3	12	63
3	13	63
3	17	63
3	19	63
3	22	63
3	24	63
3	26	63
3	58	63
3	8	64
3	29	64
3	53	64
3	84	64
3	88	64
3	44	65
3	74	65
3	90	65
3	22	66
3	49	66
3	18	67
3	28	67
3	34	67
3	46	67
3	49	67
3	53	67
3	31	68
3	34	68
3	48	68
3	49	68
3	58	68
3	62	68
3	13	69
3	14	69
3	23	69
3	42	69
3	61	69
3	75	69
3	87	69
3	89	69
3	17	70
3	35	70
3	56	70
3	65	70
3	66	70
3	16	71
3	69	71
3	74	71
3	11	72
3	16	72
3	31	72
3	40	72
3	55	72
3	18	73
3	24	73
3	55	73
3	57	73
3	81	73
3	86	73
3	29	74
3	31	74
3	66	74
3	58	75
3	63	75
3	68	75
3	48	76
3	50	76
3	61	76
3	43	77
3	66	77
3	70	77
3	73	77
3	17	78
3	26	78
3	38	78
3	30	79
3	35	79
3	45	79
3	50	79
3	46	80
3	59	80
3	32	81
3	37	81
3	68	81
3	77	81
3	40	82
3	55	82
3	66	82
3	69	82
3	61	83
3	29	84
3	52	84
3	53	84
3	60	84
3	23	85
3	49	85
3	61	85
3	44	86
3	52	86
3	60	86
3	41	87
3	46	87
3	47	87
3	49	87
3	43	88
3	51	88
3	57	88
3	71	88
3	30	89
3	54	90
3	57	90
3	60	90
3	33	91
3	43	91
3	56	91
3	58	92
3	41	93

## Sheet: Sheet4
1	41	6
1	56	6
1	46	7
1	55	7
1	56	7
1	32	9
1	38	9
1	47	9
1	58	9
1	64	9
1	67	10
1	34	11
1	53	11
1	56	12
1	72	12
1	60	13
1	32	14
1	36	14
1	61	14
1	31	15
1	41	15
1	43	15
1	23	16
1	26	16
1	31	16
1	33	16
1	53	16
1	24	17
1	29	17
1	33	17
1	46	17
1	76	17
1	32	18
1	66	18
1	75	18
1	80	18
1	32	19
1	76	19
1	38	20
1	51	20
1	74	20
1	43	21
1	56	21
1	32	22
1	38	22
1	49	22
1	73	22
1	15	23
1	32	23
1	14	24
1	30	24
1	43	24
1	53	24
1	52	25
1	76	25
1	68	26
1	79	26
1	87	26
1	88	26
1	17	27
1	69	27
1	78	27
1	82	27
1	85	27
1	22	28
1	41	28
1	65	28
1	72	28
1	78	28
1	84	28
1	86	28
1	70	29
1	74	29
1	13	30
1	45	30
1	57	30
1	66	30
1	76	30
1	36	31
1	57	31
1	62	31
1	47	32
1	56	32
1	37	33
1	58	33
1	61	33
1	46	34
1	47	34
1	67	34
1	80	34
1	81	34
1	8	35
1	22	35
1	55	35
1	61	35
1	67	35
1	18	36
1	43	36
1	65	36
1	67	36
1	13	37
1	18	37
1	71	37
1	73	37
1	89	37
1	93	37
1	22	38
1	23	38
1	35	38
1	42	38
1	70	38
1	36	39
1	77	39
1	32	40
1	33	40
1	69	40
1	76	40
1	77	40
1	86	40
1	14	41
1	20	41
1	29	41
1	60	41
1	91	41
1	20	42
1	21	42
1	22	42
1	24	42
1	32	42
1	54	42
1	88	42
1	28	43
1	47	43
1	56	43
1	94	43
1	34	44
1	78	44
1	89	44
1	19	45
1	70	45
1	72	45
1	79	45
1	90	45
1	11	46
1	24	46
1	30	46
1	54	46
1	10	47
1	35	47
1	66	47
1	28	48
1	35	48
1	57	48
1	94	48
1	26	49
1	68	49
1	90	49
1	7	50
1	76	50
1	86	50
1	88	50
1	8	51
1	15	51
1	50	51
1	82	51
1	83	51
1	16	52
1	26	52
1	29	52
1	35	52
1	37	52
1	43	52
1	78	52
1	8	53
1	62	53
1	84	53
1	17	54
1	41	54
1	46	54
1	66	54
1	79	54
1	85	54
1	55	55
1	61	55
1	76	55
1	22	56
1	49	56
1	62	56
1	80	56
1	26	57
1	29	57
1	53	57
1	73	57
1	44	58
1	60	58
1	66	58
1	71	58
1	72	58
1	75	58
1	83	58
1	31	59
1	37	59
1	64	59
1	68	59
1	77	59
1	83	59
1	16	61
1	29	61
1	89	61
1	25	62
1	34	62
1	37	62
1	43	62
1	46	62
1	68	62
1	75	62
1	92	62
1	33	63
1	42	63
1	69	63
1	92	63
1	8	64
1	19	64
1	33	64
1	42	64
1	56	64
1	26	65
1	30	65
1	32	65
1	40	65
1	75	65
1	77	65
1	90	65
1	19	66
1	30	66
1	44	66
1	48	66
1	89	66
1	74	67
1	76	67
1	41	68
1	42	68
1	62	69
1	65	69
1	89	69
1	28	70
1	11	71
1	27	71
1	29	71
1	52	71
1	60	71
1	66	71
1	79	71
1	80	71
1	32	72
1	52	72
1	62	72
1	70	72
1	31	73
1	48	73
1	73	73
1	15	74
1	85	74
1	41	75
1	62	75
1	84	75
1	20	76
1	31	76
1	45	76
1	60	76
1	67	76
1	75	76
1	30	77
1	54	77
1	80	77
1	86	77
1	31	78
1	42	78
1	49	78
1	63	78
1	27	79
1	35	79
1	44	79
1	47	79
1	84	79
1	31	80
1	59	80
1	77	80
1	25	81
1	37	82
1	66	82
1	22	83
1	31	84
1	33	84
1	37	84
1	56	84
1	76	84
1	26	85
1	43	85
1	47	85
1	48	85
1	62	85
1	64	85
1	66	85
1	23	86
1	32	86
1	47	86
1	60	86
1	31	87
1	27	88
1	44	88
1	41	89
1	63	89
1	32	90
1	63	90
1	66	90
1	40	91
1	43	92
1	59	92
1	64	92
1	56	93
1	62	93
2	12	1
2	58	1
2	59	1
2	96	1
2	16	2
2	22	2
2	40	2
2	77	2
2	98	2
2	99	2
2	2	3
2	5	3
2	66	3
2	85	3
2	62	4
2	68	4
2	41	5
2	78	5
2	9	6
2	50	6
2	51	6
2	75	6
2	100	6
2	27	7
2	46	7
2	77	7
2	9	8
2	49	8
2	71	8
2	75	8
2	5	9
2	50	9
2	98	9
2	40	10
2	10	11
2	26	11
2	39	11
2	18	12
2	28	12
2	89	12
2	3	13
2	91	13
2	34	14
2	56	14
2	86	14
2	91	14
2	4	15
2	16	15
2	27	15
2	59	15
2	88	15
2	92	15
2	40	16
2	45	16
2	77	16
2	99	16
2	14	17
2	24	17
2	33	17
2	34	17
2	63	17
2	92	17
2	1	18
2	57	18
2	65	18
2	95	18
2	32	19
2	46	19
2	71	19
2	46	20
2	71	20
2	19	21
2	21	21
2	32	21
2	48	21
2	93	21
2	96	21
2	71	22
2	4	23
2	80	23
2	25	24
2	39	24
2	41	24
2	43	24
2	46	24
2	56	24
2	63	24
2	67	24
2	54	25
2	74	25
2	89	25
2	100	25
2	10	26
2	79	26
2	50	27
2	50	28
2	47	29
2	64	29
2	68	29
2	97	29
2	14	30
2	35	30
2	54	30
2	72	30
2	80	30
2	41	31
2	70	31
2	90	31
2	44	32
2	30	33
2	73	34
2	86	34
2	7	35
2	31	35
2	49	36
2	70	36
2	90	36
2	5	37
2	44	37
2	77	37
2	18	38
2	44	38
2	73	38
2	75	38
2	38	39
2	44	39
2	65	39
2	90	39
2	3	40
2	22	40
2	73	40
2	81	40
2	92	40
2	97	40
2	41	41
2	73	41
2	74	41
2	95	41
2	34	42
2	95	42
2	3	43
2	14	43
2	49	43
2	98	43
2	13	44
2	88	44
2	30	45
2	43	45
2	63	45
2	40	46
2	54	46
2	55	46
2	59	46
2	60	46
2	94	46
2	26	47
2	69	47
2	70	47
2	2	48
2	8	48
2	16	48
2	31	48
2	42	48
2	66	48
2	99	48
2	100	48
2	2	49
2	16	49
2	34	49
2	40	49
2	64	49
2	68	49
2	90	49
2	97	49
2	28	50
2	48	51
2	95	52
2	100	52
2	25	53
2	65	53
2	72	53
2	24	54
2	64	54
2	98	54
2	22	55
2	26	55
2	85	55
2	16	56
2	37	56
2	52	56
2	76	56
2	13	57
2	16	57
2	63	57
2	75	57
2	93	57
2	56	58
2	78	58
2	41	60
2	94	61
2	27	62
2	29	62
2	31	62
2	79	62
2	81	62
2	17	63
2	35	63
2	36	63
2	40	63
2	1	64
2	23	64
2	47	64
2	91	64
2	40	65
2	41	65
2	82	65
2	12	66
2	80	66
2	65	67
2	38	69
2	47	69
2	53	69
2	63	69
2	79	69
2	57	70
2	5	71
2	28	71
2	62	71
2	73	71
2	80	71
2	95	71
2	7	72
2	28	72
2	24	74
2	26	74
2	49	74
2	97	74
2	35	75
2	55	75
2	100	75
2	90	76
2	40	77
2	51	77
2	86	77
2	5	78
2	29	78
2	41	78
2	71	78
2	89	78
2	4	79
2	61	79
2	97	80
2	92	81
2	7	83
2	17	83
2	24	83
2	72	83
2	4	84
2	8	84
2	28	84
2	57	84
2	68	84
2	71	84
2	6	85
2	25	85
2	27	85
2	29	85
2	81	85
2	21	86
2	53	86
2	1	87
2	25	87
2	1	88
2	5	88
2	7	88
2	82	88
2	10	89
2	24	89
2	52	90
2	14	91
2	82	91
2	95	91
2	51	92
2	62	92
2	23	93
2	40	93
2	46	93
2	72	93
2	76	93
2	61	94
2	40	95
2	51	95
2	73	95
2	92	95
2	74	96
2	10	97
2	15	97
2	19	97
2	22	97
2	26	97
2	35	98
2	93	98
2	20	99
2	26	99
2	64	99
2	80	100
2	92	100
3	42	6
3	37	7
3	39	7
3	41	7
3	47	7
3	36	8
3	47	9
3	52	9
3	63	9
3	51	10
3	70	10
3	34	11
3	50	11
3	53	11
3	58	11
3	41	12
3	48	12
3	68	12
3	63	13
3	67	13
3	60	14
3	61	14
3	76	14
3	22	15
3	24	15
3	44	15
3	68	15
3	27	16
3	41	16
3	69	19
3	76	19
3	18	20
3	24	20
3	44	20
3	69	20
3	83	20
3	26	21
3	65	21
3	67	21
3	84	21
3	18	22
3	82	22
3	21	23
3	22	23
3	31	23
3	42	23
3	77	23
3	82	23
3	40	24
3	47	24
3	81	24
3	63	25
3	18	26
3	43	26
3	44	26
3	54	26
3	73	26
3	16	27
3	22	27
3	25	27
3	40	27
3	44	27
3	28	28
3	39	28
3	88	28
3	38	29
3	51	29
3	65	29
3	80	29
3	81	29
3	28	30
3	34	30
3	41	30
3	51	30
3	76	30
3	24	31
3	54	31
3	37	32
3	74	32
3	9	33
3	18	33
3	39	33
3	42	33
3	21	34
3	40	34
3	67	34
3	69	34
3	73	34
3	78	34
3	30	35
3	31	35
3	52	35
3	72	35
3	88	35
3	8	36
3	38	36
3	61	36
3	91	36
3	8	37
3	42	37
3	57	37
3	64	37
3	67	37
3	81	37
3	92	37
3	14	38
3	18	38
3	28	38
3	31	38
3	32	38
3	70	38
3	77	38
3	81	38
3	8	39
3	11	39
3	44	39
3	54	39
3	60	39
3	69	39
3	82	39
3	88	39
3	13	40
3	78	40
3	84	40
3	87	40
3	9	41
3	26	41
3	33	41
3	43	41
3	52	41
3	79	41
3	83	41
3	78	42
3	26	43
3	28	43
3	53	43
3	79	43
3	32	44
3	50	44
3	78	44
3	80	44
3	89	44
3	41	45
3	65	45
3	80	45
3	21	46
3	62	46
3	79	46
3	85	46
3	86	46
3	7	47
3	17	47
3	22	47
3	43	47
3	50	47
3	51	47
3	20	48
3	90	48
3	29	49
3	57	49
3	67	49
3	78	49
3	83	49
3	9	50
3	24	50
3	48	50
3	58	50
3	70	50
3	83	50
3	93	50
3	7	51
3	60	51
3	72	51
3	9	52
3	18	52
3	57	52
3	63	52
3	12	53
3	28	53
3	61	53
3	66	53
3	8	54
3	9	54
3	24	54
3	76	54
3	94	54
3	11	55
3	20	55
3	28	55
3	32	55
3	41	55
3	42	55
3	44	55
3	51	55
3	63	55
3	91	55
3	12	56
3	16	56
3	17	56
3	18	56
3	20	56
3	22	56
3	27	56
3	35	56
3	10	57
3	35	57
3	51	57
3	54	58
3	66	58
3	72	58
3	15	59
3	81	59
3	8	60
3	14	60
3	27	60
3	11	61
3	32	61
3	9	62
3	12	62
3	15	62
3	30	62
3	45	62
3	50	62
3	66	62
3	81	62
3	12	63
3	25	63
3	83	63
3	71	64
3	84	64
3	27	65
3	35	65
3	44	65
3	50	65
3	59	65
3	68	65
3	91	65
3	26	66
3	27	66
3	39	66
3	92	66
3	61	67
3	66	67
3	75	67
3	76	67
3	11	68
3	49	68
3	69	68
3	75	68
3	81	68
3	90	68
3	18	69
3	78	69
3	85	70
3	33	71
3	40	71
3	58	71
3	63	71
3	69	71
3	78	71
3	44	72
3	68	72
3	20	73
3	32	73
3	57	73
3	52	74
3	69	74
3	72	74
3	82	74
3	85	74
3	20	75
3	26	75
3	49	75
3	30	76
3	34	76
3	81	76
3	14	77
3	38	77
3	41	77
3	50	77
3	58	77
3	70	77
3	74	77
3	21	78
3	33	78
3	51	78
3	61	78
3	22	79
3	23	79
3	26	79
3	31	79
3	45	79
3	52	79
3	64	79
3	83	79
3	38	80
3	59	80
3	63	80
3	67	80
3	30	81
3	36	81
3	30	82
3	37	82
3	40	82
3	43	82
3	23	83
3	26	83
3	59	83
3	67	83
3	57	84
3	59	84
3	60	84
3	41	85
3	63	85
3	25	86
3	37	86
3	68	86
3	41	87
3	54	87
3	61	87
3	33	88
3	37	88
3	46	88
3	53	88
3	70	88
3	29	89
3	31	89
3	68	91
3	53	92
3	54	92
3	55	92

## Sheet: Sheet5
1	44	6
1	58	9
1	43	10
1	53	10
1	54	11
1	30	13
1	41	13
1	47	13
1	51	13
1	71	14
1	43	15
1	57	15
1	68	15
1	72	15
1	70	16
1	76	16
1	27	17
1	43	17
1	56	17
1	66	17
1	29	18
1	53	18
1	56	18
1	58	18
1	71	18
1	79	18
1	80	18
1	19	19
1	33	19
1	41	19
1	35	20
1	41	20
1	43	20
1	57	20
1	81	20
1	67	21
1	74	21
1	23	22
1	30	22
1	44	22
1	67	22
1	70	22
1	83	22
1	84	22
1	22	23
1	32	23
1	14	24
1	43	24
1	56	24
1	67	24
1	34	25
1	79	25
1	38	26
1	74	26
1	80	26
1	85	26
1	55	27
1	77	27
1	39	28
1	51	28
1	55	28
1	73	28
1	81	28
1	28	29
1	41	29
1	44	29
1	78	29
1	87	29
1	13	30
1	43	30
1	59	30
1	52	32
1	58	32
1	71	32
1	78	32
1	91	32
1	13	33
1	16	33
1	39	33
1	46	33
1	48	34
1	56	34
1	73	34
1	80	34
1	82	35
1	25	36
1	27	36
1	45	36
1	58	36
1	65	36
1	92	36
1	32	37
1	35	37
1	47	37
1	57	37
1	75	37
1	25	38
1	34	39
1	67	39
1	72	39
1	75	39
1	14	40
1	28	40
1	37	40
1	86	40
1	87	40
1	45	41
1	12	42
1	21	42
1	28	42
1	7	43
1	18	43
1	21	43
1	33	43
1	78	43
1	79	43
1	20	44
1	34	44
1	35	44
1	51	44
1	68	44
1	76	44
1	79	44
1	33	45
1	34	45
1	37	45
1	39	45
1	53	45
1	60	45
1	81	45
1	9	46
1	75	46
1	91	46
1	22	47
1	41	47
1	62	47
1	8	48
1	13	48
1	24	48
1	29	48
1	51	48
1	55	48
1	56	48
1	67	48
1	87	48
1	31	49
1	35	49
1	44	50
1	54	50
1	91	50
1	23	51
1	33	51
1	59	51
1	15	52
1	27	52
1	32	52
1	56	52
1	83	52
1	89	52
1	7	53
1	19	53
1	20	53
1	21	53
1	49	53
1	63	53
1	20	54
1	31	54
1	44	54
1	75	54
1	83	54
1	69	55
1	73	55
1	8	56
1	9	56
1	33	56
1	58	56
1	70	56
1	90	56
1	8	57
1	13	57
1	16	57
1	27	57
1	53	57
1	67	57
1	71	57
1	77	57
1	29	58
1	72	58
1	78	59
1	93	59
1	94	59
1	56	60
1	58	60
1	25	61
1	53	61
1	62	61
1	69	61
1	74	61
1	81	61
1	91	61
1	16	62
1	57	62
1	7	63
1	17	63
1	37	63
1	42	63
1	73	63
1	17	64
1	25	64
1	30	64
1	49	64
1	79	64
1	86	64
1	65	65
1	92	65
1	47	66
1	85	66
1	21	67
1	54	67
1	65	67
1	66	67
1	77	67
1	31	68
1	33	68
1	54	68
1	75	68
1	22	69
1	33	69
1	59	69
1	74	69
1	82	69
1	90	69
1	15	70
1	28	70
1	55	70
1	68	70
1	15	71
1	21	71
1	50	71
1	64	71
1	11	72
1	15	72
1	31	72
1	32	72
1	41	72
1	43	72
1	73	72
1	17	73
1	39	73
1	45	73
1	56	73
1	81	73
1	82	73
1	15	74
1	42	74
1	77	74
1	29	75
1	51	75
1	81	75
1	18	76
1	25	76
1	35	76
1	39	76
1	46	76
1	32	77
1	43	77
1	26	78
1	37	78
1	38	78
1	50	78
1	56	78
1	60	78
1	18	79
1	22	79
1	29	79
1	52	79
1	80	79
1	17	80
1	28	80
1	60	80
1	61	80
1	66	80
1	71	80
1	81	80
1	82	80
1	29	81
1	39	81
1	41	81
1	62	81
1	46	82
1	58	82
1	32	83
1	78	83
1	68	84
1	73	84
1	78	84
1	25	85
1	50	85
1	25	86
1	66	86
1	36	87
1	64	88
1	45	89
1	50	89
1	59	89
1	66	89
1	67	89
1	71	89
1	44	92
1	46	92
1	52	93
2	15	1
2	27	1
2	38	1
2	49	1
2	6	2
2	47	2
2	11	3
2	45	3
2	46	3
2	96	3
2	8	4
2	2	5
2	5	5
2	21	6
2	38	6
2	52	6
2	57	6
2	62	6
2	30	7
2	62	7
2	69	7
2	21	8
2	47	8
2	72	8
2	88	8
2	3	9
2	10	9
2	36	9
2	45	9
2	68	10
2	82	10
2	4	11
2	44	11
2	42	12
2	72	12
2	15	13
2	47	13
2	63	13
2	78	13
2	84	13
2	13	14
2	14	14
2	67	14
2	8	15
2	23	15
2	66	15
2	69	15
2	48	16
2	75	16
2	79	16
2	100	16
2	7	17
2	25	17
2	37	17
2	89	17
2	94	17
2	3	18
2	22	19
2	45	19
2	50	19
2	70	19
2	18	20
2	20	20
2	80	20
2	50	21
2	53	21
2	80	21
2	100	21
2	40	22
2	62	22
2	90	22
2	56	23
2	1	24
2	33	24
2	98	24
2	6	25
2	22	26
2	31	26
2	40	26
2	26	27
2	28	27
2	40	27
2	50	28
2	64	28
2	65	28
2	68	28
2	100	28
2	66	29
2	19	30
2	53	30
2	67	30
2	94	30
2	33	31
2	45	31
2	91	31
2	2	32
2	73	32
2	11	33
2	71	33
2	76	33
2	73	34
2	9	35
2	57	35
2	78	35
2	83	35
2	33	36
2	56	36
2	61	36
2	78	36
2	94	36
2	36	37
2	52	37
2	61	37
2	93	37
2	31	38
2	48	38
2	76	39
2	84	39
2	89	39
2	14	40
2	37	40
2	62	40
2	88	40
2	92	40
2	5	41
2	13	41
2	22	41
2	38	41
2	27	42
2	40	42
2	83	42
2	16	43
2	40	43
2	91	43
2	31	44
2	94	44
2	95	44
2	57	45
2	3	46
2	83	46
2	35	48
2	38	48
2	89	48
2	51	50
2	57	50
2	58	50
2	93	50
2	29	51
2	30	51
2	51	51
2	62	51
2	97	51
2	99	51
2	34	52
2	46	52
2	65	52
2	17	53
2	31	53
2	96	53
2	63	54
2	61	55
2	13	56
2	54	56
2	71	56
2	99	56
2	89	57
2	26	58
2	42	58
2	45	58
2	58	58
2	12	59
2	23	59
2	37	59
2	86	59
2	81	60
2	55	61
2	60	62
2	72	62
2	7	63
2	20	63
2	72	64
2	80	64
2	24	65
2	36	65
2	44	65
2	64	65
2	83	66
2	92	66
2	30	67
2	33	67
2	40	67
2	64	67
2	3	68
2	10	68
2	26	68
2	53	68
2	63	68
2	66	68
2	83	68
2	7	69
2	11	70
2	84	70
2	3	71
2	73	71
2	75	71
2	61	72
2	99	72
2	31	73
2	81	73
2	51	74
2	67	74
2	68	74
2	70	74
2	3	75
2	22	75
2	28	75
2	90	75
2	11	76
2	16	76
2	21	76
2	61	76
2	4	77
2	33	78
2	59	78
2	59	79
2	67	79
2	82	79
2	95	79
2	23	80
2	43	80
2	53	80
2	95	80
2	36	81
2	43	81
2	76	81
2	38	82
2	62	82
2	70	82
2	72	82
2	77	82
2	94	82
2	75	83
2	78	83
2	87	83
2	9	84
2	40	84
2	73	85
2	88	85
2	11	86
2	38	86
2	49	87
2	72	87
2	79	87
2	22	88
2	40	88
2	42	88
2	48	88
2	81	88
2	14	89
2	25	89
2	65	89
2	98	89
2	100	89
2	1	90
2	70	90
2	17	91
2	37	91
2	85	91
2	86	91
2	99	92
2	87	93
2	91	93
2	4	94
2	21	94
2	46	94
2	29	95
2	40	95
2	70	95
2	35	96
2	43	96
2	49	96
2	92	96
2	63	97
2	83	97
2	100	97
2	26	98
2	64	98
2	35	99
2	42	99
2	61	99
2	82	99
2	95	99
2	28	100
2	43	100
3	47	7
3	39	8
3	51	8
3	55	8
3	54	9
3	52	10
3	55	10
3	56	10
3	70	10
3	31	11
3	41	11
3	43	11
3	65	11
3	40	12
3	25	13
3	32	13
3	37	13
3	39	13
3	50	13
3	75	14
3	24	15
3	54	15
3	72	15
3	76	15
3	43	16
3	47	16
3	76	16
3	77	16
3	28	17
3	53	17
3	22	19
3	47	19
3	61	19
3	67	19
3	79	19
3	40	20
3	43	20
3	20	21
3	32	21
3	46	21
3	29	22
3	85	22
3	28	23
3	36	23
3	67	23
3	83	23
3	40	24
3	69	24
3	19	25
3	38	25
3	24	27
3	37	27
3	43	27
3	58	27
3	62	27
3	70	27
3	81	27
3	18	28
3	64	28
3	84	28
3	68	29
3	74	29
3	78	29
3	51	30
3	84	30
3	12	31
3	31	31
3	39	31
3	67	31
3	84	31
3	20	32
3	49	32
3	56	32
3	74	32
3	13	33
3	47	33
3	72	33
3	77	33
3	88	33
3	91	33
3	33	34
3	38	34
3	40	34
3	30	35
3	37	35
3	43	35
3	55	35
3	65	35
3	76	35
3	13	36
3	37	36
3	45	36
3	92	36
3	27	37
3	62	37
3	28	38
3	46	38
3	69	38
3	28	39
3	29	39
3	34	39
3	37	39
3	49	39
3	62	39
3	63	39
3	27	40
3	33	40
3	58	40
3	66	40
3	76	40
3	82	40
3	22	41
3	40	41
3	67	41
3	72	41
3	92	41
3	24	42
3	45	42
3	46	42
3	61	42
3	73	42
3	93	42
3	14	43
3	38	43
3	66	43
3	84	43
3	33	44
3	57	44
3	65	44
3	81	44
3	7	45
3	12	45
3	49	45
3	84	45
3	88	45
3	10	46
3	30	46
3	32	46
3	44	46
3	50	46
3	70	46
3	18	47
3	28	47
3	39	47
3	41	47
3	64	47
3	73	47
3	81	47
3	27	48
3	55	48
3	78	48
3	7	49
3	36	49
3	56	49
3	30	50
3	95	50
3	74	51
3	77	51
3	84	51
3	15	52
3	44	52
3	48	52
3	10	53
3	13	53
3	34	53
3	56	53
3	70	53
3	83	53
3	9	54
3	27	54
3	37	54
3	38	54
3	36	55
3	71	55
3	85	55
3	93	55
3	30	56
3	92	56
3	30	57
3	39	57
3	23	58
3	26	58
3	41	58
3	54	58
3	80	58
3	87	58
3	12	59
3	17	59
3	25	59
3	31	59
3	57	59
3	65	59
3	68	59
3	73	59
3	89	59
3	9	60
3	28	60
3	39	60
3	67	60
3	91	60
3	25	61
3	52	61
3	93	61
3	68	62
3	74	63
3	57	64
3	63	64
3	79	64
3	13	65
3	16	65
3	62	65
3	63	65
3	79	65
3	83	65
3	33	66
3	63	66
3	20	67
3	25	67
3	36	67
3	64	67
3	70	67
3	84	67
3	60	68
3	77	68
3	80	68
3	85	68
3	86	68
3	24	69
3	40	69
3	82	69
3	71	70
3	77	70
3	12	71
3	55	71
3	57	71
3	70	71
3	49	72
3	51	72
3	59	72
3	60	72
3	65	72
3	79	72
3	19	73
3	23	73
3	25	73
3	81	73
3	14	74
3	16	74
3	75	74
3	16	75
3	41	75
3	62	75
3	64	75
3	78	75
3	86	75
3	15	76
3	18	76
3	37	76
3	43	76
3	47	76
3	84	76
3	15	77
3	33	77
3	15	78
3	29	78
3	34	78
3	53	78
3	65	78
3	66	78
3	69	78
3	79	78
3	80	78
3	49	79
3	72	79
3	24	80
3	35	80
3	44	80
3	48	80
3	51	80
3	61	80
3	79	80
3	32	81
3	61	81
3	74	81
3	22	82
3	25	82
3	39	82
3	25	83
3	32	83
3	37	83
3	49	83
3	77	83
3	49	84
3	62	84
3	65	84
3	70	84
3	73	84
3	79	84
3	30	85
3	43	85
3	67	85
3	39	86
3	28	87
3	33	87
3	35	87
3	47	87
3	59	87
3	71	87
3	33	88
3	39	88
3	52	88
3	60	88
3	66	88
3	58	89
3	34	91
3	63	91
3	68	91
3	36	92
3	59	92
3	40	93
3	45	93
3	49	94

## Sheet: Sheet6
1	45	8
1	62	8
1	66	8
1	34	10
1	41	10
1	61	10
1	64	10
1	33	11
1	36	11
1	46	12
1	49	12
1	57	12
1	65	12
1	46	13
1	47	13
1	48	13
1	26	14
1	67	14
1	68	14
1	25	15
1	28	15
1	39	15
1	57	15
1	24	16
1	38	16
1	51	16
1	67	16
1	73	16
1	33	17
1	44	17
1	61	17
1	21	18
1	53	18
1	57	18
1	60	18
1	68	18
1	81	18
1	31	20
1	28	21
1	73	21
1	78	21
1	20	22
1	21	22
1	38	22
1	42	22
1	43	22
1	84	22
1	39	23
1	66	23
1	15	24
1	20	24
1	44	24
1	47	24
1	64	24
1	82	24
1	31	25
1	36	25
1	55	25
1	65	25
1	40	26
1	77	26
1	83	26
1	14	27
1	76	27
1	13	28
1	17	28
1	31	28
1	75	28
1	82	28
1	19	29
1	20	29
1	45	29
1	59	29
1	83	29
1	13	30
1	14	30
1	35	30
1	45	30
1	48	30
1	82	30
1	87	30
1	89	30
1	39	31
1	66	31
1	77	31
1	60	32
1	70	32
1	73	32
1	24	33
1	46	33
1	55	33
1	60	33
1	91	33
1	47	34
1	54	34
1	32	35
1	42	35
1	47	35
1	68	35
1	76	35
1	88	35
1	89	36
1	37	37
1	54	37
1	58	37
1	68	37
1	75	37
1	38	38
1	50	38
1	92	38
1	9	39
1	22	39
1	86	39
1	39	40
1	73	40
1	33	41
1	45	41
1	53	41
1	65	41
1	54	42
1	72	42
1	10	43
1	34	43
1	54	43
1	56	43
1	65	43
1	65	44
1	70	44
1	81	44
1	83	44
1	93	44
1	43	45
1	60	45
1	91	45
1	31	46
1	70	46
1	77	46
1	84	46
1	92	46
1	94	46
1	9	48
1	11	48
1	16	48
1	39	48
1	40	48
1	60	48
1	68	48
1	83	48
1	89	48
1	11	49
1	18	49
1	42	49
1	62	49
1	82	49
1	90	49
1	20	50
1	22	50
1	48	50
1	69	50
1	28	51
1	29	51
1	31	51
1	54	51
1	73	51
1	15	52
1	23	52
1	59	52
1	68	52
1	72	52
1	77	52
1	11	54
1	37	54
1	56	54
1	64	54
1	18	55
1	20	55
1	42	55
1	30	56
1	51	56
1	78	56
1	26	57
1	42	57
1	50	57
1	76	57
1	85	57
1	60	58
1	61	58
1	64	58
1	68	58
1	62	59
1	76	59
1	78	59
1	85	59
1	46	60
1	50	60
1	18	61
1	20	61
1	34	61
1	50	61
1	66	61
1	73	61
1	81	61
1	85	61
1	15	62
1	28	62
1	30	62
1	53	62
1	57	62
1	62	62
1	70	62
1	73	62
1	85	62
1	23	63
1	47	63
1	74	63
1	75	63
1	85	63
1	46	64
1	52	64
1	70	64
1	72	64
1	8	65
1	40	65
1	45	65
1	40	66
1	42	66
1	46	66
1	59	66
1	63	66
1	15	67
1	42	67
1	52	67
1	63	67
1	72	67
1	89	67
1	67	68
1	81	68
1	10	69
1	54	69
1	64	69
1	45	70
1	55	70
1	26	71
1	38	71
1	53	71
1	54	71
1	61	71
1	76	71
1	83	71
1	16	72
1	20	72
1	42	72
1	66	72
1	89	72
1	39	73
1	52	73
1	25	74
1	26	74
1	44	74
1	77	74
1	43	75
1	71	75
1	78	75
1	79	75
1	85	75
1	29	76
1	48	76
1	57	76
1	61	76
1	64	76
1	77	76
1	19	77
1	37	77
1	45	77
1	51	77
1	80	77
1	22	78
1	24	79
1	54	79
1	62	79
1	73	79
1	78	79
1	79	79
1	81	79
1	82	79
1	34	80
1	80	80
1	18	81
1	40	81
1	49	81
1	64	81
1	80	81
1	19	82
1	24	82
1	71	83
1	77	83
1	79	83
1	33	84
1	37	84
1	66	84
1	78	84
1	24	85
1	65	85
1	39	86
1	55	86
1	69	88
1	30	89
1	45	89
1	67	89
1	30	90
1	35	90
1	43	90
1	64	90
1	38	91
1	39	92
1	42	92
1	62	92
1	54	93
2	66	1
2	85	1
2	26	2
2	41	2
2	42	2
2	50	2
2	58	2
2	60	2
2	37	3
2	46	3
2	90	3
2	99	3
2	17	4
2	39	4
2	55	4
2	80	4
2	3	5
2	48	5
2	34	7
2	35	7
2	86	7
2	26	8
2	92	8
2	16	9
2	53	9
2	54	9
2	28	10
2	51	10
2	56	10
2	66	10
2	68	10
2	73	10
2	8	11
2	32	11
2	45	11
2	56	11
2	61	11
2	85	11
2	94	11
2	75	12
2	43	13
2	94	13
2	25	14
2	51	14
2	73	14
2	24	15
2	66	15
2	82	15
2	85	15
2	99	15
2	1	16
2	6	16
2	24	16
2	48	16
2	94	16
2	27	17
2	54	17
2	57	17
2	6	18
2	42	18
2	44	18
2	61	18
2	5	19
2	26	20
2	34	20
2	91	20
2	26	21
2	63	21
2	66	22
2	91	22
2	96	22
2	11	23
2	78	23
2	2	24
2	24	24
2	4	25
2	62	25
2	98	25
2	100	25
2	24	26
2	61	26
2	75	26
2	9	27
2	37	27
2	82	27
2	11	28
2	77	28
2	89	28
2	5	30
2	10	31
2	64	31
2	5	32
2	64	32
2	15	33
2	18	33
2	29	33
2	32	34
2	61	34
2	68	34
2	43	35
2	64	35
2	65	35
2	85	35
2	2	36
2	32	36
2	33	36
2	56	36
2	72	36
2	5	37
2	8	37
2	18	37
2	55	37
2	86	37
2	45	38
2	67	38
2	75	38
2	85	38
2	8	39
2	23	39
2	50	39
2	63	39
2	40	40
2	69	40
2	8	41
2	6	42
2	36	42
2	75	42
2	83	42
2	89	42
2	90	42
2	76	43
2	91	43
2	76	44
2	91	44
2	5	45
2	10	45
2	24	46
2	28	46
2	16	47
2	19	47
2	43	47
2	95	47
2	41	48
2	61	48
2	68	48
2	18	49
2	26	49
2	11	50
2	31	50
2	61	50
2	72	50
2	84	50
2	60	51
2	83	51
2	89	51
2	70	52
2	96	52
2	12	53
2	35	53
2	74	53
2	11	54
2	67	54
2	84	54
2	47	55
2	63	55
2	65	55
2	77	55
2	46	56
2	51	56
2	72	56
2	68	57
2	10	58
2	31	58
2	44	58
2	73	58
2	99	58
2	24	59
2	72	59
2	3	60
2	61	60
2	90	60
2	5	61
2	44	61
2	85	61
2	15	62
2	21	62
2	38	63
2	75	63
2	25	64
2	26	64
2	38	64
2	94	64
2	88	65
2	9	66
2	30	66
2	32	66
2	63	66
2	65	66
2	78	67
2	79	67
2	3	68
2	26	68
2	28	68
2	33	68
2	58	68
2	76	68
2	84	69
2	93	69
2	10	70
2	24	70
2	39	70
2	40	70
2	61	70
2	72	70
2	54	71
2	91	71
2	29	72
2	40	72
2	48	72
2	68	72
2	26	73
2	29	73
2	97	73
2	54	74
2	89	74
2	5	75
2	33	75
2	26	76
2	97	76
2	98	76
2	100	76
2	13	77
2	17	77
2	26	77
2	85	77
2	26	79
2	48	79
2	7	80
2	25	80
2	41	80
2	58	80
2	17	81
2	97	81
2	24	82
2	32	82
2	8	83
2	26	83
2	42	83
2	52	83
2	54	83
2	62	83
2	2	84
2	6	84
2	47	84
2	60	84
2	75	84
2	90	85
2	71	86
2	1	87
2	23	87
2	56	87
2	25	88
2	53	88
2	1	89
2	5	89
2	37	89
2	55	89
2	78	89
2	83	89
2	10	90
2	24	90
2	94	90
2	99	90
2	71	91
2	99	91
2	17	92
2	61	92
2	80	92
2	84	92
2	5	93
2	13	93
2	22	93
2	33	93
2	7	94
2	10	94
2	32	94
2	55	94
2	66	94
2	97	94
2	15	95
2	28	95
2	34	95
2	36	95
2	38	95
2	51	95
2	6	96
2	56	96
2	58	96
2	25	97
2	74	97
2	5	98
2	18	98
2	35	98
2	62	98
2	63	98
2	3	99
2	33	99
2	43	99
2	7	100
2	85	100
3	55	6
3	63	7
3	43	8
3	34	9
3	45	9
3	57	11
3	27	12
3	29	12
3	42	12
3	60	12
3	61	12
3	68	12
3	48	13
3	49	13
3	56	13
3	42	14
3	51	14
3	53	15
3	62	15
3	69	15
3	73	15
3	26	16
3	42	16
3	43	16
3	72	16
3	73	16
3	33	17
3	36	17
3	45	17
3	71	17
3	79	17
3	29	18
3	36	18
3	38	18
3	75	18
3	40	19
3	73	19
3	76	19
3	78	19
3	79	19
3	82	19
3	40	20
3	49	20
3	80	20
3	27	21
3	29	21
3	83	21
3	39	22
3	43	22
3	52	23
3	85	23
3	34	24
3	70	24
3	40	25
3	58	25
3	75	25
3	24	26
3	49	26
3	65	26
3	78	26
3	51	27
3	52	27
3	53	27
3	59	27
3	61	27
3	65	28
3	86	28
3	68	29
3	76	29
3	78	29
3	27	30
3	32	30
3	48	30
3	70	30
3	71	30
3	79	30
3	43	31
3	55	31
3	65	31
3	79	31
3	83	31
3	10	32
3	16	32
3	31	32
3	34	32
3	37	32
3	59	32
3	65	32
3	21	33
3	44	33
3	61	33
3	77	33
3	43	34
3	85	34
3	13	35
3	20	35
3	33	35
3	34	35
3	42	35
3	47	35
3	72	35
3	77	35
3	88	35
3	32	36
3	35	36
3	43	36
3	79	36
3	80	36
3	87	36
3	14	37
3	25	38
3	45	38
3	46	38
3	60	38
3	61	38
3	66	38
3	24	39
3	34	39
3	51	39
3	19	40
3	21	40
3	28	40
3	45	40
3	52	40
3	69	40
3	15	41
3	16	41
3	41	41
3	43	41
3	59	41
3	73	41
3	81	41
3	92	41
3	31	42
3	48	42
3	55	42
3	82	42
3	24	43
3	59	43
3	72	43
3	14	44
3	27	44
3	75	44
3	40	45
3	51	45
3	57	45
3	83	45
3	84	45
3	88	45
3	9	46
3	17	46
3	24	46
3	25	46
3	34	46
3	48	46
3	78	46
3	88	46
3	13	47
3	16	47
3	58	47
3	80	47
3	85	47
3	12	48
3	21	48
3	45	48
3	49	48
3	72	48
3	53	49
3	68	49
3	83	49
3	85	49
3	21	50
3	59	50
3	18	51
3	23	51
3	26	51
3	28	51
3	61	51
3	7	52
3	16	52
3	18	52
3	8	53
3	36	53
3	75	53
3	85	53
3	40	54
3	47	54
3	50	54
3	76	54
3	78	54
3	15	55
3	59	55
3	88	55
3	50	56
3	87	56
3	6	57
3	32	57
3	49	57
3	60	57
3	20	58
3	37	58
3	41	58
3	59	58
3	74	58
3	23	59
3	32	59
3	44	59
3	65	59
3	67	59
3	10	60
3	14	60
3	25	60
3	35	60
3	72	60
3	63	61
3	90	61
3	92	61
3	13	62
3	19	62
3	26	62
3	79	62
3	12	63
3	28	63
3	46	63
3	49	63
3	65	63
3	81	63
3	10	64
3	13	64
3	15	64
3	26	64
3	63	64
3	67	65
3	78	65
3	87	65
3	85	67
3	14	68
3	28	68
3	52	68
3	88	68
3	29	69
3	53	69
3	79	69
3	83	69
3	13	70
3	17	70
3	27	70
3	35	70
3	39	70
3	54	70
3	67	70
3	73	70
3	24	71
3	31	71
3	88	71
3	11	72
3	27	72
3	12	73
3	21	73
3	27	73
3	28	73
3	39	73
3	42	73
3	73	73
3	83	73
3	40	74
3	57	74
3	72	74
3	73	74
3	87	74
3	20	75
3	27	75
3	40	75
3	46	75
3	58	75
3	63	75
3	76	75
3	28	76
3	86	76
3	16	77
3	51	77
3	53	77
3	67	77
3	36	78
3	37	78
3	41	79
3	65	79
3	38	80
3	42	80
3	47	80
3	48	80
3	65	80
3	73	80
3	25	81
3	60	81
3	62	81
3	70	81
3	42	82
3	50	82
3	58	82
3	73	82
3	78	82
3	21	83
3	27	84
3	28	84
3	53	84
3	56	84
3	73	84
3	27	85
3	61	85
3	33	86
3	42	86
3	64	86
3	72	86
3	74	86
3	28	87
3	40	87
3	43	87
3	46	87
3	50	87
3	54	87
3	68	87
3	53	88
3	55	88
3	68	88
3	74	88
3	30	89
3	43	89
3	56	89
3	58	89
3	65	89
3	68	89
3	39	90
3	44	91
3	46	92
3	37	93

## Sheet: Sheet7
1	44	6
1	54	6
1	51	9
1	33	10
1	46	10
1	63	10
1	38	11
1	44	12
1	48	12
1	65	12
1	71	12
1	30	13
1	44	13
1	50	13
1	52	13
1	26	14
1	41	14
1	64	14
1	67	14
1	37	15
1	40	15
1	40	16
1	46	16
1	24	17
1	35	17
1	41	17
1	46	17
1	47	17
1	28	18
1	32	18
1	38	18
1	47	18
1	52	18
1	53	18
1	58	18
1	81	19
1	22	20
1	33	20
1	35	21
1	46	21
1	37	22
1	64	22
1	17	23
1	23	23
1	35	23
1	42	23
1	82	23
1	35	24
1	27	25
1	55	25
1	59	25
1	75	25
1	13	26
1	34	26
1	47	26
1	60	26
1	45	27
1	86	27
1	15	28
1	46	28
1	54	28
1	68	28
1	76	28
1	23	29
1	81	29
1	87	29
1	11	30
1	27	30
1	40	30
1	60	30
1	61	30
1	69	30
1	70	30
1	18	31
1	31	31
1	9	32
1	11	32
1	19	32
1	28	32
1	33	32
1	40	32
1	55	32
1	56	32
1	60	32
1	88	32
1	31	33
1	32	33
1	42	33
1	86	33
1	17	34
1	71	34
1	87	34
1	16	35
1	40	35
1	47	35
1	70	35
1	30	36
1	33	36
1	62	36
1	77	36
1	79	36
1	66	37
1	90	37
1	35	38
1	55	38
1	60	38
1	69	38
1	84	38
1	89	38
1	93	38
1	20	39
1	33	39
1	34	39
1	87	39
1	93	39
1	30	40
1	64	40
1	15	41
1	21	41
1	27	41
1	28	41
1	41	41
1	43	41
1	51	41
1	62	41
1	71	41
1	26	42
1	43	42
1	9	43
1	50	43
1	70	43
1	72	43
1	7	44
1	9	44
1	13	44
1	22	44
1	39	44
1	65	44
1	72	44
1	16	45
1	67	45
1	69	45
1	80	45
1	18	46
1	20	46
1	23	46
1	48	46
1	50	46
1	65	46
1	80	46
1	84	46
1	28	47
1	34	47
1	70	47
1	57	48
1	72	48
1	10	49
1	84	49
1	33	51
1	48	51
1	51	51
1	83	51
1	88	51
1	51	52
1	35	53
1	54	53
1	71	53
1	80	53
1	83	53
1	12	54
1	49	54
1	55	54
1	61	54
1	80	54
1	59	55
1	69	55
1	15	56
1	28	56
1	38	56
1	48	56
1	59	56
1	74	56
1	77	56
1	23	57
1	27	57
1	93	57
1	11	58
1	36	58
1	41	58
1	90	58
1	23	59
1	63	59
1	91	59
1	94	59
1	12	60
1	13	60
1	18	60
1	55	60
1	88	60
1	44	61
1	56	61
1	69	61
1	72	61
1	9	62
1	44	62
1	54	62
1	92	62
1	29	63
1	80	63
1	13	64
1	64	64
1	81	64
1	89	64
1	92	64
1	23	65
1	41	65
1	60	65
1	66	65
1	67	65
1	79	65
1	86	65
1	87	65
1	10	66
1	47	66
1	49	66
1	53	66
1	55	66
1	80	66
1	83	66
1	92	66
1	63	67
1	65	67
1	67	67
1	69	67
1	76	67
1	85	67
1	21	68
1	52	68
1	66	68
1	72	68
1	32	69
1	59	69
1	69	69
1	26	70
1	64	70
1	80	70
1	89	70
1	43	71
1	44	71
1	78	71
1	17	72
1	35	72
1	43	72
1	47	72
1	49	72
1	28	73
1	30	73
1	31	73
1	32	73
1	34	73
1	46	73
1	60	73
1	70	73
1	73	73
1	19	74
1	20	74
1	55	74
1	15	75
1	17	75
1	55	75
1	63	75
1	15	76
1	19	76
1	34	76
1	49	76
1	19	77
1	48	77
1	15	78
1	17	78
1	24	78
1	48	78
1	67	78
1	76	78
1	82	79
1	17	80
1	42	80
1	49	80
1	82	80
1	74	81
1	23	82
1	33	82
1	65	82
1	28	83
1	40	83
1	44	83
1	69	83
1	70	83
1	62	84
1	68	84
1	75	84
1	37	85
1	51	85
1	56	85
1	60	85
1	30	86
1	59	86
1	72	86
1	33	87
1	34	87
1	37	87
1	40	88
1	37	89
1	40	89
1	72	89
1	33	90
1	35	91
1	36	91
1	50	92
1	54	92
1	62	92
1	50	94
2	7	1
2	20	1
2	37	1
2	60	1
2	8	2
2	46	2
2	68	2
2	17	3
2	29	3
2	87	4
2	64	5
2	95	5
2	96	5
2	7	7
2	10	7
2	53	7
2	64	7
2	87	7
2	9	8
2	16	8
2	73	8
2	47	9
2	50	9
2	90	9
2	93	9
2	100	9
2	49	10
2	74	10
2	75	10
2	3	11
2	19	11
2	26	11
2	39	11
2	42	11
2	55	11
2	10	12
2	24	12
2	92	12
2	22	13
2	54	13
2	96	13
2	14	15
2	21	15
2	29	15
2	91	15
2	17	16
2	32	16
2	75	16
2	57	17
2	96	17
2	14	19
2	37	19
2	46	19
2	66	19
2	7	20
2	46	20
2	70	20
2	75	20
2	27	21
2	32	21
2	63	21
2	69	21
2	70	21
2	85	21
2	80	22
2	18	23
2	25	23
2	28	23
2	45	23
2	82	23
2	14	24
2	22	24
2	44	24
2	56	24
2	63	24
2	82	24
2	69	25
2	84	25
2	5	26
2	54	26
2	11	27
2	15	27
2	36	27
2	47	27
2	80	27
2	18	28
2	34	28
2	68	28
2	83	28
2	94	28
2	89	29
2	5	30
2	37	30
2	96	30
2	9	31
2	40	31
2	61	31
2	51	32
2	73	32
2	83	32
2	95	32
2	4	33
2	47	33
2	58	33
2	64	33
2	84	33
2	97	33
2	38	34
2	88	34
2	53	35
2	67	35
2	78	35
2	31	36
2	63	36
2	100	36
2	1	37
2	21	37
2	64	37
2	76	37
2	5	38
2	21	38
2	48	38
2	70	38
2	89	38
2	59	39
2	30	40
2	75	40
2	52	41
2	2	42
2	31	42
2	56	42
2	60	42
2	75	42
2	33	43
2	44	43
2	50	43
2	96	43
2	7	44
2	52	44
2	92	44
2	26	45
2	81	46
2	100	46
2	19	47
2	37	47
2	9	48
2	88	48
2	97	48
2	65	49
2	70	49
2	73	49
2	13	50
2	80	50
2	63	51
2	87	51
2	100	52
2	1	53
2	46	53
2	49	53
2	77	53
2	98	53
2	6	54
2	40	54
2	8	55
2	25	55
2	97	55
2	8	56
2	17	56
2	54	56
2	78	56
2	96	56
2	9	57
2	32	57
2	48	57
2	50	57
2	51	57
2	4	58
2	18	58
2	57	58
2	70	58
2	75	58
2	6	59
2	9	59
2	10	59
2	36	59
2	54	59
2	81	59
2	9	60
2	10	60
2	29	60
2	84	60
2	7	61
2	44	61
2	71	61
2	72	61
2	11	62
2	44	62
2	53	62
2	81	62
2	34	63
2	79	63
2	8	64
2	72	64
2	63	65
2	99	65
2	34	66
2	50	66
2	67	66
2	70	66
2	84	66
2	88	66
2	37	67
2	69	67
2	9	68
2	23	68
2	97	68
2	72	69
2	17	70
2	42	70
2	43	70
2	50	70
2	88	70
2	21	71
2	35	71
2	83	71
2	50	72
2	66	73
2	29	74
2	8	75
2	34	75
2	47	75
2	85	75
2	95	76
2	43	77
2	83	78
2	18	79
2	30	79
2	31	79
2	33	79
2	34	79
2	60	79
2	63	79
2	77	79
2	85	80
2	86	80
2	52	81
2	57	81
2	19	82
2	25	82
2	27	82
2	84	82
2	9	83
2	12	83
2	25	83
2	28	83
2	32	83
2	74	83
2	20	84
2	68	84
2	27	85
2	19	86
2	72	86
2	8	87
2	18	87
2	27	87
2	62	87
2	98	87
2	8	88
2	31	88
2	35	88
2	70	88
2	75	88
2	80	89
2	88	89
2	93	89
2	12	90
2	16	90
2	29	90
2	30	90
2	37	90
2	67	90
2	83	90
2	4	91
2	52	91
2	62	91
2	87	92
2	4	93
2	39	93
2	47	93
2	85	93
2	70	94
2	88	94
2	9	95
2	55	95
2	86	95
2	33	96
2	61	96
2	79	96
2	92	96
2	23	97
2	91	97
2	32	98
2	72	98
2	84	98
2	89	98
2	18	99
2	15	100
2	23	100
2	24	100
2	38	100
2	96	100
3	55	7
3	62	7
3	52	8
3	60	8
3	34	9
3	47	9
3	51	9
3	50	10
3	65	10
3	41	11
3	50	11
3	62	11
3	64	11
3	72	11
3	31	12
3	50	12
3	69	12
3	32	13
3	60	13
3	69	13
3	75	13
3	47	14
3	43	15
3	67	15
3	72	15
3	74	15
3	27	16
3	61	16
3	28	17
3	41	17
3	43	17
3	44	17
3	74	17
3	66	18
3	23	19
3	36	19
3	56	19
3	74	19
3	63	20
3	21	21
3	40	21
3	25	22
3	47	22
3	59	22
3	18	23
3	33	23
3	35	23
3	25	24
3	71	24
3	77	24
3	48	25
3	80	25
3	85	25
3	19	26
3	43	26
3	59	26
3	43	27
3	50	27
3	73	27
3	79	27
3	80	27
3	82	27
3	28	28
3	86	28
3	20	29
3	23	29
3	38	29
3	60	29
3	14	30
3	49	30
3	58	30
3	45	31
3	70	31
3	81	33
3	62	34
3	38	35
3	49	35
3	89	35
3	91	35
3	33	36
3	58	36
3	63	36
3	81	36
3	27	37
3	34	37
3	49	37
3	54	37
3	64	37
3	80	37
3	14	38
3	42	38
3	46	38
3	68	38
3	74	38
3	92	38
3	9	39
3	12	39
3	29	39
3	77	39
3	93	39
3	14	40
3	16	40
3	66	40
3	69	40
3	77	40
3	9	41
3	35	41
3	49	41
3	60	41
3	64	41
3	84	41
3	39	42
3	54	42
3	65	42
3	66	42
3	9	43
3	10	43
3	67	43
3	69	43
3	75	43
3	80	43
3	19	44
3	55	44
3	23	45
3	30	45
3	55	45
3	58	45
3	69	45
3	76	45
3	22	46
3	32	46
3	83	46
3	86	46
3	92	46
3	39	47
3	73	47
3	82	47
3	89	47
3	18	48
3	83	48
3	32	49
3	80	49
3	90	49
3	94	49
3	13	50
3	29	50
3	45	50
3	46	50
3	55	50
3	62	50
3	93	50
3	17	51
3	81	51
3	11	52
3	13	52
3	62	52
3	41	53
3	87	53
3	20	54
3	34	54
3	40	54
3	52	54
3	58	54
3	87	54
3	91	54
3	41	55
3	52	55
3	59	55
3	7	56
3	9	56
3	13	56
3	18	56
3	22	56
3	34	56
3	15	57
3	18	57
3	44	57
3	54	57
3	55	57
3	87	57
3	92	57
3	6	58
3	19	58
3	28	58
3	36	58
3	48	58
3	65	58
3	74	58
3	83	58
3	93	58
3	15	59
3	41	59
3	45	59
3	51	59
3	22	60
3	93	60
3	9	61
3	18	61
3	24	61
3	33	61
3	40	61
3	60	61
3	86	61
3	25	62
3	29	62
3	47	62
3	78	62
3	9	64
3	44	64
3	49	64
3	29	65
3	45	65
3	74	65
3	20	66
3	45	66
3	47	66
3	49	66
3	57	66
3	59	66
3	66	66
3	74	66
3	80	66
3	9	67
3	23	67
3	27	67
3	82	67
3	27	68
3	40	68
3	50	68
3	87	68
3	12	69
3	52	69
3	64	69
3	70	69
3	79	69
3	26	70
3	53	70
3	70	70
3	82	70
3	88	71
3	38	72
3	52	72
3	65	72
3	74	72
3	54	73
3	56	73
3	73	74
3	81	74
3	25	75
3	38	75
3	40	75
3	41	75
3	60	75
3	69	75
3	70	75
3	71	75
3	21	76
3	48	76
3	58	76
3	66	76
3	79	76
3	23	77
3	25	77
3	50	77
3	55	77
3	67	77
3	15	78
3	43	78
3	46	78
3	18	79
3	27	79
3	29	79
3	40	79
3	53	81
3	57	81
3	65	81
3	36	82
3	65	82
3	77	82
3	34	83
3	22	84
3	27	84
3	37	84
3	50	84
3	52	84
3	53	84
3	63	85
3	74	85
3	59	87
3	60	87
3	65	87
3	37	88
3	44	88
3	52	88
3	63	88
3	61	89
3	32	90
3	37	90
3	43	90
3	52	91
3	54	91
3	41	92
3	48	92
3	43	93
3	51	93
3	58	93
3	60	93
3	53	94

## Sheet: Sheet8
1	43	6
1	56	7
1	39	9
1	44	9
1	56	10
1	56	11
1	32	12
1	45	12
1	65	12
1	59	13
1	62	13
1	44	14
1	35	15
1	77	15
1	41	16
1	56	16
1	57	16
1	42	17
1	46	17
1	54	17
1	56	17
1	26	18
1	33	18
1	39	18
1	45	18
1	22	19
1	33	19
1	50	19
1	65	19
1	67	19
1	21	20
1	29	20
1	38	20
1	46	20
1	65	20
1	34	21
1	79	21
1	43	22
1	45	22
1	60	22
1	80	22
1	35	23
1	48	23
1	72	23
1	78	23
1	85	23
1	44	24
1	49	24
1	50	24
1	84	24
1	44	25
1	68	25
1	71	25
1	26	26
1	64	26
1	79	26
1	81	26
1	50	27
1	74	27
1	76	27
1	85	27
1	19	28
1	24	28
1	33	28
1	34	28
1	35	29
1	39	29
1	61	29
1	67	29
1	75	29
1	78	29
1	85	29
1	15	30
1	34	30
1	41	30
1	57	30
1	60	30
1	70	30
1	84	30
1	39	31
1	48	31
1	73	31
1	24	32
1	29	33
1	61	33
1	68	33
1	8	34
1	15	34
1	36	34
1	47	34
1	86	34
1	18	35
1	54	35
1	66	35
1	80	35
1	15	36
1	24	36
1	56	36
1	83	36
1	15	37
1	24	37
1	30	37
1	31	37
1	55	37
1	88	37
1	91	37
1	8	38
1	11	38
1	45	38
1	48	38
1	62	38
1	67	38
1	22	39
1	37	39
1	38	39
1	42	39
1	52	39
1	63	39
1	76	39
1	7	40
1	37	40
1	51	40
1	65	40
1	87	40
1	37	41
1	44	41
1	49	41
1	69	41
1	76	41
1	86	41
1	88	41
1	36	42
1	46	42
1	57	42
1	74	42
1	9	43
1	24	43
1	44	43
1	51	43
1	70	43
1	86	43
1	19	44
1	47	44
1	55	44
1	78	44
1	49	45
1	51	45
1	69	45
1	10	46
1	56	46
1	60	46
1	28	47
1	38	47
1	52	47
1	68	47
1	73	47
1	7	48
1	61	48
1	90	48
1	23	49
1	56	49
1	70	49
1	7	50
1	16	50
1	26	50
1	50	50
1	59	50
1	68	50
1	87	50
1	38	51
1	49	51
1	50	51
1	52	51
1	58	51
1	71	51
1	80	51
1	89	51
1	7	52
1	15	52
1	23	52
1	43	52
1	85	52
1	93	52
1	16	53
1	47	53
1	61	53
1	25	54
1	31	54
1	53	54
1	58	54
1	69	54
1	52	55
1	67	55
1	21	56
1	32	56
1	41	56
1	42	56
1	51	56
1	53	56
1	56	56
1	57	56
1	83	56
1	94	56
1	13	57
1	14	57
1	40	57
1	47	57
1	48	57
1	56	57
1	61	57
1	38	58
1	54	58
1	81	58
1	6	59
1	16	59
1	30	59
1	35	59
1	71	59
1	81	59
1	14	60
1	24	60
1	29	60
1	33	60
1	76	60
1	77	60
1	83	60
1	9	61
1	37	61
1	47	61
1	63	61
1	74	61
1	78	61
1	88	61
1	11	62
1	13	62
1	40	62
1	47	62
1	68	62
1	69	62
1	14	63
1	17	63
1	26	63
1	30	63
1	42	63
1	46	63
1	49	64
1	72	64
1	92	64
1	20	65
1	44	65
1	83	65
1	84	65
1	90	65
1	32	66
1	43	66
1	61	66
1	64	66
1	83	66
1	89	66
1	69	67
1	16	68
1	39	68
1	59	68
1	67	68
1	73	68
1	77	68
1	37	69
1	57	69
1	69	69
1	23	70
1	36	70
1	39	70
1	90	70
1	20	71
1	43	71
1	51	71
1	68	71
1	76	71
1	87	71
1	15	72
1	24	72
1	53	72
1	85	72
1	47	73
1	54	73
1	24	74
1	49	74
1	62	74
1	63	74
1	77	74
1	19	75
1	52	75
1	74	75
1	80	75
1	17	76
1	19	76
1	62	76
1	86	76
1	25	77
1	26	77
1	29	77
1	36	77
1	51	77
1	33	78
1	57	78
1	68	78
1	76	78
1	79	78
1	20	79
1	24	79
1	36	79
1	67	79
1	76	79
1	17	80
1	28	81
1	54	81
1	64	81
1	70	81
1	79	81
1	42	82
1	49	82
1	25	83
1	29	83
1	33	83
1	72	83
1	73	83
1	25	84
1	48	84
1	53	84
1	56	84
1	34	85
1	58	85
1	64	85
1	47	86
1	33	87
1	34	87
1	47	87
1	74	87
1	37	88
1	42	89
1	65	89
1	46	90
1	37	91
1	41	91
1	50	92
1	48	93
2	26	1
2	45	2
2	10	3
2	16	3
2	43	3
2	60	3
2	2	4
2	3	4
2	17	4
2	79	4
2	17	5
2	19	5
2	22	5
2	29	5
2	30	5
2	35	5
2	83	5
2	32	6
2	45	6
2	78	6
2	87	6
2	14	7
2	26	7
2	61	7
2	13	8
2	41	8
2	37	9
2	46	9
2	64	9
2	98	9
2	10	10
2	74	10
2	4	11
2	22	11
2	57	11
2	83	11
2	88	11
2	13	12
2	51	12
2	94	12
2	75	13
2	78	13
2	88	13
2	15	14
2	36	14
2	73	14
2	86	14
2	41	15
2	85	15
2	12	16
2	36	16
2	90	16
2	95	16
2	7	17
2	46	17
2	56	17
2	66	17
2	20	18
2	73	18
2	4	19
2	40	19
2	20	20
2	31	20
2	38	20
2	48	20
2	76	20
2	1	21
2	23	21
2	39	21
2	43	21
2	50	21
2	58	21
2	69	21
2	74	21
2	85	21
2	14	23
2	75	23
2	94	23
2	49	24
2	96	24
2	4	26
2	82	26
2	88	26
2	97	26
2	4	27
2	31	27
2	69	27
2	71	27
2	91	27
2	69	28
2	6	30
2	32	30
2	79	30
2	87	30
2	29	32
2	70	32
2	54	33
2	57	33
2	63	33
2	63	34
2	77	34
2	79	34
2	82	34
2	4	35
2	60	35
2	65	35
2	71	35
2	26	36
2	69	36
2	72	36
2	28	37
2	39	37
2	52	37
2	79	37
2	89	37
2	90	37
2	32	38
2	48	38
2	63	39
2	67	39
2	85	39
2	67	40
2	22	41
2	31	41
2	46	41
2	68	41
2	96	41
2	19	42
2	58	42
2	76	42
2	37	43
2	80	43
2	50	44
2	68	44
2	35	45
2	69	45
2	71	45
2	10	46
2	47	46
2	64	46
2	7	47
2	27	47
2	42	47
2	47	48
2	4	49
2	9	49
2	11	49
2	28	49
2	71	49
2	77	49
2	33	50
2	43	50
2	44	50
2	7	51
2	32	51
2	39	51
2	46	52
2	21	53
2	24	53
2	55	53
2	63	53
2	7	54
2	44	54
2	5	55
2	10	55
2	16	55
2	27	55
2	81	55
2	22	56
2	72	56
2	16	57
2	35	57
2	74	57
2	83	57
2	38	58
2	70	58
2	86	58
2	13	59
2	30	59
2	70	59
2	7	60
2	30	60
2	57	60
2	66	60
2	72	60
2	1	61
2	15	61
2	36	61
2	40	61
2	15	62
2	17	62
2	64	62
2	76	62
2	9	63
2	75	63
2	99	63
2	8	65
2	32	65
2	51	65
2	86	65
2	87	65
2	89	65
2	95	65
2	2	66
2	3	66
2	14	66
2	7	67
2	92	67
2	93	67
2	96	67
2	100	67
2	11	68
2	18	68
2	51	68
2	68	68
2	84	68
2	87	68
2	33	69
2	39	69
2	49	69
2	55	69
2	59	69
2	19	70
2	67	70
2	24	71
2	49	71
2	19	72
2	30	72
2	52	72
2	33	74
2	62	74
2	63	74
2	71	74
2	72	74
2	92	74
2	94	74
2	2	76
2	42	76
2	46	76
2	48	76
2	32	77
2	43	77
2	12	78
2	46	78
2	2	79
2	7	79
2	28	79
2	9	80
2	68	80
2	34	81
2	46	81
2	80	81
2	33	82
2	43	82
2	56	82
2	60	82
2	85	82
2	11	83
2	12	84
2	30	84
2	63	84
2	2	85
2	7	85
2	42	85
2	90	85
2	93	85
2	19	86
2	45	86
2	48	86
2	68	86
2	92	86
2	41	87
2	45	87
2	84	87
2	67	88
2	69	88
2	97	88
2	68	90
2	78	90
2	65	91
2	80	91
2	47	92
2	63	92
2	67	92
2	69	92
2	94	92
2	50	93
2	60	93
2	73	93
2	13	94
2	41	94
2	76	94
2	96	94
2	2	95
2	11	95
2	17	95
2	45	95
2	63	95
2	4	96
2	70	96
2	80	96
2	74	97
2	77	97
2	79	97
2	35	98
2	33	99
2	48	99
2	68	99
3	36	9
3	60	9
3	38	10
3	43	10
3	65	10
3	67	10
3	28	11
3	46	11
3	72	11
3	50	12
3	73	12
3	30	13
3	45	13
3	59	13
3	24	14
3	49	14
3	37	15
3	38	15
3	73	16
3	40	17
3	48	17
3	52	17
3	74	17
3	76	17
3	33	18
3	80	18
3	48	19
3	49	19
3	58	19
3	74	19
3	79	19
3	58	20
3	63	20
3	73	20
3	76	20
3	77	20
3	23	21
3	77	21
3	38	22
3	60	22
3	77	22
3	82	22
3	24	23
3	58	23
3	29	24
3	63	24
3	79	24
3	41	25
3	70	25
3	76	25
3	79	25
3	33	26
3	45	26
3	48	26
3	49	26
3	46	27
3	58	27
3	26	28
3	47	28
3	68	28
3	72	28
3	22	29
3	28	29
3	59	29
3	77	29
3	13	30
3	32	30
3	33	30
3	85	30
3	37	31
3	43	31
3	72	31
3	76	31
3	77	31
3	28	32
3	60	32
3	62	32
3	34	33
3	44	33
3	45	33
3	61	33
3	8	34
3	13	34
3	64	34
3	17	35
3	34	35
3	38	35
3	40	35
3	46	35
3	66	35
3	86	35
3	26	36
3	45	36
3	74	36
3	8	37
3	29	37
3	34	37
3	45	37
3	68	37
3	92	37
3	22	38
3	48	38
3	64	38
3	67	38
3	90	38
3	19	39
3	27	39
3	31	39
3	24	40
3	59	40
3	64	40
3	81	40
3	83	40
3	87	40
3	46	41
3	84	41
3	27	42
3	29	42
3	47	42
3	72	42
3	83	42
3	14	43
3	19	43
3	28	43
3	58	43
3	72	43
3	73	43
3	55	44
3	25	45
3	45	45
3	46	45
3	72	45
3	74	45
3	94	45
3	7	46
3	16	46
3	31	46
3	76	46
3	11	47
3	14	47
3	29	47
3	59	47
3	66	47
3	81	47
3	93	47
3	52	48
3	72	48
3	26	49
3	51	49
3	61	49
3	91	49
3	54	50
3	62	50
3	67	50
3	82	50
3	8	51
3	15	51
3	33	51
3	36	51
3	53	51
3	74	51
3	22	52
3	31	52
3	32	52
3	52	52
3	64	52
3	84	52
3	7	53
3	8	53
3	29	53
3	41	53
3	83	53
3	26	54
3	65	54
3	31	55
3	32	55
3	61	55
3	68	55
3	76	55
3	83	55
3	10	56
3	49	56
3	51	56
3	79	56
3	54	57
3	55	57
3	61	57
3	62	57
3	71	57
3	88	57
3	92	57
3	15	58
3	16	58
3	28	58
3	64	58
3	67	58
3	19	59
3	25	59
3	28	59
3	46	59
3	50	59
3	62	59
3	85	59
3	89	59
3	46	60
3	52	60
3	57	60
3	61	60
3	68	60
3	9	61
3	42	61
3	49	61
3	55	61
3	12	62
3	15	62
3	34	62
3	40	62
3	68	62
3	85	62
3	22	63
3	46	63
3	73	63
3	75	63
3	81	63
3	88	63
3	31	64
3	32	64
3	39	64
3	54	64
3	30	65
3	82	65
3	18	66
3	23	66
3	80	66
3	17	67
3	81	67
3	29	68
3	30	68
3	42	68
3	68	68
3	75	68
3	11	69
3	51	69
3	26	70
3	27	70
3	58	70
3	69	70
3	76	70
3	77	70
3	11	71
3	23	71
3	51	71
3	51	72
3	52	72
3	56	72
3	71	72
3	87	72
3	26	73
3	41	73
3	61	73
3	31	74
3	37	74
3	39	74
3	56	74
3	57	74
3	71	74
3	81	75
3	14	76
3	23	76
3	26	76
3	27	76
3	62	76
3	72	76
3	48	77
3	26	78
3	31	78
3	41	78
3	55	78
3	37	79
3	23	80
3	44	80
3	49	80
3	69	80
3	73	80
3	80	80
3	43	81
3	52	81
3	53	81
3	60	81
3	80	81
3	25	82
3	67	82
3	69	82
3	70	82
3	72	82
3	75	82
3	20	83
3	22	83
3	25	83
3	45	83
3	73	83
3	27	84
3	33	84
3	39	84
3	40	84
3	49	84
3	51	84
3	57	85
3	25	86
3	26	86
3	28	86
3	46	86
3	74	86
3	75	86
3	46	87
3	51	88
3	34	89
3	62	89
3	66	89
3	33	90
3	44	90
3	50	90
3	55	90
3	34	91
3	35	91
3	62	91
3	66	92
3	59	93
3	58	94

## Sheet: Sheet9
1	46	6
1	39	7
1	42	7
1	56	7
1	53	8
1	63	8
1	64	9
1	63	10
1	69	10
1	58	11
1	63	11
1	66	11
1	27	12
1	36	12
1	49	12
1	57	12
1	60	12
1	39	13
1	48	13
1	46	14
1	62	14
1	66	14
1	69	14
1	31	16
1	35	16
1	55	16
1	72	16
1	20	17
1	76	17
1	34	18
1	60	18
1	79	18
1	32	19
1	55	19
1	66	19
1	61	20
1	68	20
1	71	20
1	18	21
1	28	21
1	41	21
1	52	21
1	54	21
1	55	21
1	58	21
1	46	23
1	75	23
1	76	23
1	78	23
1	82	23
1	58	24
1	70	24
1	51	25
1	53	25
1	79	25
1	25	26
1	57	26
1	66	26
1	67	26
1	85	26
1	31	27
1	37	27
1	41	27
1	61	27
1	20	28
1	25	28
1	43	28
1	15	29
1	27	29
1	63	29
1	87	29
1	30	30
1	40	30
1	51	30
1	67	30
1	68	30
1	36	31
1	45	31
1	55	31
1	67	31
1	69	31
1	14	32
1	72	32
1	73	32
1	12	33
1	18	33
1	35	33
1	76	33
1	40	34
1	47	34
1	55	34
1	75	34
1	78	34
1	87	34
1	24	35
1	30	35
1	40	35
1	81	35
1	84	35
1	19	36
1	21	36
1	24	36
1	25	36
1	35	36
1	74	36
1	90	36
1	92	36
1	40	37
1	49	37
1	87	37
1	41	38
1	63	38
1	21	39
1	45	39
1	46	39
1	57	39
1	65	39
1	90	39
1	38	40
1	46	40
1	57	40
1	11	41
1	18	41
1	37	41
1	44	41
1	45	41
1	70	41
1	72	41
1	94	41
1	52	42
1	58	42
1	84	42
1	92	42
1	19	43
1	33	43
1	64	43
1	72	43
1	32	44
1	33	44
1	57	44
1	66	44
1	16	45
1	23	45
1	62	45
1	78	45
1	6	46
1	11	46
1	32	46
1	45	46
1	57	46
1	79	46
1	93	46
1	52	47
1	63	47
1	17	48
1	42	48
1	75	48
1	92	48
1	8	49
1	21	49
1	28	49
1	33	49
1	38	49
1	47	49
1	72	49
1	18	50
1	74	50
1	75	50
1	11	51
1	35	51
1	40	51
1	74	51
1	21	52
1	27	52
1	63	52
1	66	52
1	84	52
1	7	53
1	11	53
1	52	53
1	55	53
1	86	53
1	93	53
1	11	54
1	16	54
1	29	54
1	54	54
1	61	54
1	71	54
1	72	54
1	37	55
1	48	55
1	64	55
1	80	55
1	47	56
1	52	56
1	10	57
1	11	57
1	55	57
1	84	57
1	33	58
1	44	58
1	75	58
1	19	59
1	42	59
1	46	59
1	81	59
1	87	59
1	30	60
1	37	60
1	50	60
1	51	60
1	52	60
1	54	60
1	62	60
1	68	60
1	83	60
1	8	61
1	39	61
1	49	61
1	77	61
1	85	61
1	89	61
1	91	61
1	30	62
1	39	62
1	46	62
1	65	62
1	68	62
1	87	62
1	21	63
1	30	63
1	35	63
1	36	63
1	38	63
1	41	63
1	60	63
1	70	63
1	45	64
1	53	64
1	63	64
1	13	65
1	26	65
1	37	65
1	44	65
1	50	65
1	51	65
1	52	65
1	56	65
1	34	66
1	66	66
1	78	66
1	84	66
1	87	66
1	38	67
1	58	67
1	85	67
1	31	68
1	50	68
1	57	68
1	26	69
1	11	70
1	20	70
1	61	70
1	75	70
1	89	70
1	13	71
1	36	71
1	69	72
1	70	72
1	81	72
1	86	72
1	19	73
1	25	73
1	29	73
1	19	74
1	51	74
1	66	74
1	80	74
1	43	75
1	80	75
1	83	75
1	60	76
1	75	76
1	80	76
1	54	77
1	66	77
1	69	77
1	44	78
1	54	78
1	61	78
1	64	78
1	82	78
1	31	79
1	38	79
1	25	80
1	25	81
1	52	81
1	69	81
1	25	82
1	33	82
1	73	82
1	25	83
1	32	83
1	78	83
1	28	84
1	35	84
1	22	85
1	29	85
1	49	85
1	72	85
1	29	86
1	26	87
1	31	87
1	54	87
1	55	87
1	73	87
1	75	87
1	31	88
1	72	88
1	37	89
1	36	91
1	65	91
1	49	92
1	54	94
2	26	1
2	78	1
2	97	1
2	40	2
2	86	2
2	11	4
2	74	4
2	5	6
2	31	6
2	43	6
2	5	7
2	17	7
2	85	7
2	88	7
2	34	8
2	39	8
2	44	8
2	49	8
2	52	8
2	78	8
2	85	8
2	35	9
2	38	9
2	79	10
2	91	10
2	98	10
2	25	11
2	54	11
2	59	11
2	60	11
2	72	11
2	92	11
2	15	12
2	24	12
2	27	12
2	7	13
2	15	13
2	1	14
2	17	14
2	24	14
2	36	14
2	60	14
2	67	14
2	54	15
2	21	16
2	65	16
2	68	16
2	78	16
2	52	17
2	72	17
2	75	17
2	11	18
2	17	18
2	35	18
2	39	18
2	63	18
2	67	18
2	1	19
2	17	19
2	79	19
2	87	19
2	42	20
2	65	20
2	96	20
2	2	21
2	62	21
2	85	21
2	88	21
2	93	21
2	14	22
2	42	22
2	62	22
2	3	23
2	4	23
2	46	23
2	69	23
2	9	24
2	25	24
2	61	25
2	69	25
2	81	25
2	1	26
2	7	26
2	11	26
2	72	26
2	98	26
2	3	27
2	5	27
2	6	27
2	20	27
2	36	27
2	1	28
2	52	28
2	67	28
2	59	29
2	62	29
2	41	31
2	61	31
2	93	31
2	5	32
2	35	33
2	74	33
2	77	33
2	65	34
2	70	34
2	76	34
2	50	35
2	70	35
2	78	35
2	6	36
2	20	36
2	48	36
2	78	36
2	6	37
2	20	37
2	36	37
2	70	37
2	88	37
2	94	37
2	10	38
2	33	38
2	34	38
2	72	38
2	5	39
2	18	39
2	2	40
2	12	40
2	63	40
2	72	40
2	85	40
2	23	41
2	67	41
2	70	41
2	98	41
2	37	42
2	46	42
2	23	43
2	50	43
2	80	43
2	36	44
2	95	44
2	5	45
2	31	45
2	53	45
2	13	46
2	12	47
2	14	47
2	27	47
2	29	47
2	49	47
2	52	47
2	71	47
2	89	47
2	27	48
2	59	48
2	83	48
2	53	49
2	92	49
2	28	50
2	70	50
2	21	51
2	34	51
2	57	51
2	61	51
2	65	52
2	7	53
2	45	53
2	48	53
2	82	53
2	92	53
2	95	53
2	19	54
2	32	54
2	33	54
2	34	54
2	55	54
2	74	54
2	100	54
2	7	55
2	15	55
2	36	55
2	49	56
2	70	56
2	78	56
2	97	56
2	62	57
2	65	57
2	10	58
2	28	58
2	47	58
2	89	58
2	97	58
2	31	59
2	59	59
2	74	59
2	98	59
2	37	60
2	49	60
2	81	60
2	30	61
2	63	61
2	1	62
2	77	62
2	19	63
2	32	63
2	80	63
2	81	63
2	20	64
2	27	64
2	84	64
2	86	64
2	87	64
2	25	65
2	91	65
2	51	66
2	88	66
2	25	67
2	60	67
2	74	67
2	80	67
2	95	67
2	99	67
2	100	67
2	29	68
2	62	68
2	73	68
2	4	69
2	30	69
2	37	69
2	38	69
2	47	69
2	11	70
2	12	70
2	14	70
2	77	70
2	83	70
2	37	71
2	47	71
2	77	71
2	1	72
2	47	72
2	62	72
2	82	72
2	6	73
2	79	73
2	82	73
2	14	74
2	71	74
2	4	75
2	16	75
2	35	75
2	91	75
2	10	76
2	24	76
2	26	77
2	29	77
2	69	77
2	71	77
2	47	78
2	86	78
2	4	79
2	21	79
2	56	79
2	57	79
2	100	79
2	26	80
2	40	80
2	90	80
2	63	81
2	87	81
2	18	82
2	71	82
2	32	84
2	57	84
2	80	84
2	94	84
2	6	85
2	26	85
2	28	85
2	58	85
2	37	86
2	32	87
2	78	87
2	90	87
2	64	88
2	14	89
2	15	89
2	67	89
2	5	90
2	39	90
2	76	90
2	88	90
2	13	91
2	24	91
2	7	92
2	55	92
2	16	93
2	42	93
2	94	93
2	2	94
2	55	94
2	53	95
2	44	96
2	59	96
2	66	96
2	6	97
2	23	97
2	56	97
2	86	97
2	54	98
2	83	98
2	7	99
2	33	99
2	46	99
2	91	99
2	8	100
2	81	100
3	48	7
3	44	8
3	62	8
3	36	10
3	42	10
3	68	10
3	38	11
3	49	11
3	51	11
3	54	11
3	59	11
3	72	11
3	56	12
3	60	12
3	33	13
3	50	13
3	59	14
3	64	14
3	65	14
3	30	15
3	49	15
3	61	15
3	64	15
3	21	16
3	30	16
3	32	16
3	54	16
3	65	17
3	20	18
3	54	18
3	27	19
3	38	19
3	50	19
3	51	20
3	55	20
3	77	20
3	20	21
3	29	21
3	62	21
3	69	21
3	75	21
3	16	22
3	25	22
3	36	22
3	46	22
3	51	22
3	78	22
3	14	23
3	20	23
3	64	23
3	82	23
3	45	24
3	14	25
3	26	25
3	28	25
3	34	25
3	35	25
3	47	25
3	52	25
3	73	25
3	40	26
3	88	26
3	47	27
3	52	27
3	61	27
3	73	27
3	26	28
3	76	28
3	12	29
3	23	29
3	29	29
3	20	30
3	23	30
3	43	30
3	58	30
3	88	30
3	90	30
3	33	31
3	50	31
3	74	31
3	78	31
3	81	31
3	15	32
3	29	32
3	43	32
3	49	32
3	30	33
3	70	33
3	85	33
3	22	34
3	27	34
3	46	34
3	60	34
3	87	34
3	22	35
3	29	35
3	30	35
3	53	35
3	87	35
3	89	35
3	16	36
3	25	36
3	31	36
3	52	36
3	54	36
3	82	36
3	83	36
3	27	37
3	35	37
3	49	37
3	59	37
3	87	37
3	15	38
3	16	38
3	23	38
3	47	38
3	64	38
3	66	38
3	88	38
3	13	39
3	63	39
3	42	40
3	65	40
3	13	41
3	29	41
3	37	41
3	40	41
3	68	41
3	69	41
3	89	41
3	19	42
3	25	42
3	45	42
3	46	42
3	54	42
3	55	42
3	58	42
3	61	42
3	84	42
3	87	42
3	15	43
3	46	43
3	83	43
3	89	43
3	10	44
3	25	44
3	42	44
3	50	44
3	53	44
3	31	45
3	32	45
3	58	45
3	80	45
3	94	45
3	10	46
3	93	46
3	24	47
3	33	47
3	37	47
3	62	47
3	82	47
3	84	47
3	86	47
3	89	47
3	51	48
3	20	49
3	29	49
3	31	49
3	35	49
3	81	49
3	18	50
3	40	50
3	57	50
3	66	50
3	76	50
3	79	50
3	84	50
3	87	50
3	6	51
3	9	51
3	48	51
3	56	51
3	63	51
3	82	51
3	25	52
3	29	52
3	38	52
3	56	52
3	80	52
3	22	53
3	27	53
3	38	53
3	85	53
3	90	53
3	25	54
3	27	54
3	45	54
3	83	54
3	88	54
3	80	55
3	14	56
3	25	56
3	39	56
3	84	56
3	49	57
3	55	57
3	66	57
3	6	58
3	33	58
3	35	58
3	36	58
3	37	58
3	46	58
3	57	58
3	71	58
3	73	58
3	7	59
3	26	59
3	39	59
3	49	59
3	65	59
3	74	59
3	79	59
3	7	60
3	12	60
3	24	60
3	37	60
3	51	60
3	73	60
3	75	60
3	37	61
3	39	61
3	61	61
3	67	61
3	72	61
3	74	61
3	81	61
3	84	61
3	30	62
3	40	62
3	42	62
3	20	63
3	21	63
3	32	63
3	42	63
3	55	63
3	90	63
3	93	63
3	27	64
3	87	64
3	46	65
3	62	66
3	64	66
3	73	66
3	23	67
3	72	67
3	83	67
3	16	68
3	25	68
3	33	68
3	48	68
3	55	68
3	73	68
3	14	69
3	51	69
3	55	69
3	90	69
3	40	70
3	53	70
3	56	70
3	64	70
3	13	71
3	25	71
3	35	71
3	79	72
3	82	72
3	47	73
3	69	73
3	77	73
3	81	73
3	15	74
3	22	74
3	29	74
3	58	74
3	66	74
3	68	74
3	72	74
3	74	74
3	86	74
3	29	75
3	31	75
3	41	75
3	46	75
3	68	75
3	37	76
3	59	76
3	77	76
3	79	76
3	81	76
3	82	76
3	50	77
3	81	77
3	25	78
3	42	78
3	48	78
3	54	78
3	77	78
3	78	78
3	81	78
3	60	79
3	71	79
3	83	79
3	18	80
3	27	80
3	31	80
3	42	80
3	50	80
3	55	80
3	66	80
3	33	81
3	34	81
3	39	81
3	48	81
3	52	81
3	76	81
3	69	82
3	80	82
3	76	83
3	62	84
3	44	85
3	55	85
3	53	86
3	55	86
3	42	87
3	44	87
3	30	88
3	34	88
3	48	88
3	38	89
3	38	90
3	49	90
3	59	90
3	35	91
3	49	91
3	52	91
3	59	91
3	45	92
3	48	92
3	63	92
3	44	93
3	56	93

[truncated: 91 more sheets: Sheet10, Sheet11, Sheet12, Sheet13, Sheet14, Sheet15, Sheet16, Sheet17, Sheet18, Sheet19, Sheet20, Sheet21, Sheet22, Sheet23, Sheet24, Sheet25, Sheet26, Sheet27, Sheet28, Sheet29 …]
