# Supplementary material for: Dissecting multilayer cell–cell communications with signaling feedback loops from spatial transcriptomics data
Source: HighWire-hosted journal article supplement (doi:10.1101/gr.279857.124), 2025-04-22
Supplement: Supplemental_Table_S11.xlsx [file Supplemental_Table_S11.xlsx]

## Sheet: Table S11 - README
Sheet1	The spatial coordinates of 100 groups of data in simulation dataset 3-group 1
Sheet2	The spatial coordinates of 100 groups of data in simulation dataset 3-group 2
Sheet3	The spatial coordinates of 100 groups of data in simulation dataset 3-group 3
Sheet4	The spatial coordinates of 100 groups of data in simulation dataset 3-group 4
Sheet5	The spatial coordinates of 100 groups of data in simulation dataset 3-group 5
Sheet6	The spatial coordinates of 100 groups of data in simulation dataset 3-group 6
Sheet7	The spatial coordinates of 100 groups of data in simulation dataset 3-group 7
Sheet8	The spatial coordinates of 100 groups of data in simulation dataset 3-group 8
Sheet9	The spatial coordinates of 100 groups of data in simulation dataset 3-group 9
Sheet10	The spatial coordinates of 100 groups of data in simulation dataset 3-group 10
Sheet11	The spatial coordinates of 100 groups of data in simulation dataset 3-group 11
Sheet12	The spatial coordinates of 100 groups of data in simulation dataset 3-group 12
Sheet13	The spatial coordinates of 100 groups of data in simulation dataset 3-group 13
Sheet14	The spatial coordinates of 100 groups of data in simulation dataset 3-group 14
Sheet15	The spatial coordinates of 100 groups of data in simulation dataset 3-group 15
Sheet16	The spatial coordinates of 100 groups of data in simulation dataset 3-group 16
Sheet17	The spatial coordinates of 100 groups of data in simulation dataset 3-group 17
Sheet18	The spatial coordinates of 100 groups of data in simulation dataset 3-group 18
Sheet19	The spatial coordinates of 100 groups of data in simulation dataset 3-group 19
Sheet20	The spatial coordinates of 100 groups of data in simulation dataset 3-group 20
Sheet21	The spatial coordinates of 100 groups of data in simulation dataset 3-group 21
Sheet22	The spatial coordinates of 100 groups of data in simulation dataset 3-group 22
Sheet23	The spatial coordinates of 100 groups of data in simulation dataset 3-group 23
Sheet24	The spatial coordinates of 100 groups of data in simulation dataset 3-group 24
Sheet25	The spatial coordinates of 100 groups of data in simulation dataset 3-group 25
Sheet26	The spatial coordinates of 100 groups of data in simulation dataset 3-group 26
Sheet27	The spatial coordinates of 100 groups of data in simulation dataset 3-group 27
Sheet28	The spatial coordinates of 100 groups of data in simulation dataset 3-group 28
Sheet29	The spatial coordinates of 100 groups of data in simulation dataset 3-group 29
Sheet30	The spatial coordinates of 100 groups of data in simulation dataset 3-group 30
Sheet31	The spatial coordinates of 100 groups of data in simulation dataset 3-group 31
Sheet32	The spatial coordinates of 100 groups of data in simulation dataset 3-group 32
Sheet33	The spatial coordinates of 100 groups of data in simulation dataset 3-group 33
Sheet34	The spatial coordinates of 100 groups of data in simulation dataset 3-group 34
Sheet35	The spatial coordinates of 100 groups of data in simulation dataset 3-group 35
Sheet36	The spatial coordinates of 100 groups of data in simulation dataset 3-group 36
Sheet37	The spatial coordinates of 100 groups of data in simulation dataset 3-group 37
Sheet38	The spatial coordinates of 100 groups of data in simulation dataset 3-group 38
Sheet39	The spatial coordinates of 100 groups of data in simulation dataset 3-group 39
Sheet40	The spatial coordinates of 100 groups of data in simulation dataset 3-group 40
Sheet41	The spatial coordinates of 100 groups of data in simulation dataset 3-group 41
Sheet42	The spatial coordinates of 100 groups of data in simulation dataset 3-group 42
Sheet43	The spatial coordinates of 100 groups of data in simulation dataset 3-group 43
Sheet44	The spatial coordinates of 100 groups of data in simulation dataset 3-group 44
Sheet45	The spatial coordinates of 100 groups of data in simulation dataset 3-group 45
Sheet46	The spatial coordinates of 100 groups of data in simulation dataset 3-group 46
Sheet47	The spatial coordinates of 100 groups of data in simulation dataset 3-group 47
Sheet48	The spatial coordinates of 100 groups of data in simulation dataset 3-group 48
Sheet49	The spatial coordinates of 100 groups of data in simulation dataset 3-group 49
Sheet50	The spatial coordinates of 100 groups of data in simulation dataset 3-group 50
Sheet51	The spatial coordinates of 100 groups of data in simulation dataset 3-group 51
Sheet52	The spatial coordinates of 100 groups of data in simulation dataset 3-group 52
Sheet53	The spatial coordinates of 100 groups of data in simulation dataset 3-group 53
Sheet54	The spatial coordinates of 100 groups of data in simulation dataset 3-group 54
Sheet55	The spatial coordinates of 100 groups of data in simulation dataset 3-group 55
Sheet56	The spatial coordinates of 100 groups of data in simulation dataset 3-group 56
Sheet57	The spatial coordinates of 100 groups of data in simulation dataset 3-group 57
Sheet58	The spatial coordinates of 100 groups of data in simulation dataset 3-group 58
Sheet59	The spatial coordinates of 100 groups of data in simulation dataset 3-group 59
Sheet60	The spatial coordinates of 100 groups of data in simulation dataset 3-group 60
Sheet61	The spatial coordinates of 100 groups of data in simulation dataset 3-group 61
Sheet62	The spatial coordinates of 100 groups of data in simulation dataset 3-group 62
Sheet63	The spatial coordinates of 100 groups of data in simulation dataset 3-group 63
Sheet64	The spatial coordinates of 100 groups of data in simulation dataset 3-group 64
Sheet65	The spatial coordinates of 100 groups of data in simulation dataset 3-group 65
Sheet66	The spatial coordinates of 100 groups of data in simulation dataset 3-group 66
Sheet67	The spatial coordinates of 100 groups of data in simulation dataset 3-group 67
Sheet68	The spatial coordinates of 100 groups of data in simulation dataset 3-group 68
Sheet69	The spatial coordinates of 100 groups of data in simulation dataset 3-group 69
Sheet70	The spatial coordinates of 100 groups of data in simulation dataset 3-group 70
Sheet71	The spatial coordinates of 100 groups of data in simulation dataset 3-group 71
Sheet72	The spatial coordinates of 100 groups of data in simulation dataset 3-group 72
Sheet73	The spatial coordinates of 100 groups of data in simulation dataset 3-group 73
Sheet74	The spatial coordinates of 100 groups of data in simulation dataset 3-group 74
Sheet75	The spatial coordinates of 100 groups of data in simulation dataset 3-group 75
Sheet76	The spatial coordinates of 100 groups of data in simulation dataset 3-group 76
Sheet77	The spatial coordinates of 100 groups of data in simulation dataset 3-group 77
Sheet78	The spatial coordinates of 100 groups of data in simulation dataset 3-group 78
Sheet79	The spatial coordinates of 100 groups of data in simulation dataset 3-group 79
Sheet80	The spatial coordinates of 100 groups of data in simulation dataset 3-group 80
Sheet81	The spatial coordinates of 100 groups of data in simulation dataset 3-group 81
Sheet82	The spatial coordinates of 100 groups of data in simulation dataset 3-group 82
Sheet83	The spatial coordinates of 100 groups of data in simulation dataset 3-group 83
Sheet84	The spatial coordinates of 100 groups of data in simulation dataset 3-group 84
Sheet85	The spatial coordinates of 100 groups of data in simulation dataset 3-group 85
Sheet86	The spatial coordinates of 100 groups of data in simulation dataset 3-group 86
Sheet87	The spatial coordinates of 100 groups of data in simulation dataset 3-group 87
Sheet88	The spatial coordinates of 100 groups of data in simulation dataset 3-group 88
Sheet89	The spatial coordinates of 100 groups of data in simulation dataset 3-group 89
Sheet90	The spatial coordinates of 100 groups of data in simulation dataset 3-group 90
Sheet91	The spatial coordinates of 100 groups of data in simulation dataset 3-group 91
Sheet92	The spatial coordinates of 100 groups of data in simulation dataset 3-group 92
Sheet93	The spatial coordinates of 100 groups of data in simulation dataset 3-group 93
Sheet94	The spatial coordinates of 100 groups of data in simulation dataset 3-group 94
Sheet95	The spatial coordinates of 100 groups of data in simulation dataset 3-group 95
Sheet96	The spatial coordinates of 100 groups of data in simulation dataset 3-group 96
Sheet97	The spatial coordinates of 100 groups of data in simulation dataset 3-group 97
Sheet98	The spatial coordinates of 100 groups of data in simulation dataset 3-group 98
Sheet99	The spatial coordinates of 100 groups of data in simulation dataset 3-group 99
Sheet100	The spatial coordinates of 100 groups of data in simulation dataset 3-group 100

## Sheet: Sheet1
1	9	1
1	10	1
1	12	1
1	13	1
1	20	1
1	39	1
1	57	1
1	66	1
1	18	2
1	20	1
1	66	1
1	26	3
1	51	3
1	57	1
1	97	3
1	9	1
1	30	3
1	39	1
1	50	4
1	57	1
1	66	1
1	86	4
1	12	1
1	30	3
1	16	6
1	26	3
1	80	6
1	7	6
1	12	7
1	26	3
1	85	7
1	7	6
1	12	7
1	50	4
1	12	7
1	43	1
1	1	10
1	4	7
1	36	10
1	54	9
1	91	6
1	1	10
1	18	11
1	43	1
1	50	10
1	70	11
1	73	11
1	90	11
1	90	10
1	43	12
1	63	8
1	70	11
1	73	11
1	1	7
1	1	7
1	18	13
1	50	10
1	73	11
1	1	7
1	4	7
1	62	10
1	79	14
1	81	14
1	1	7
1	63	8
1	31	12
1	37	16
1	75	16
1	14	17
1	25	13
1	25	13
1	52	16
1	59	15
1	74	17
1	92	17
1	35	18
1	40	15
1	43	15
1	62	10
1	68	18
1	75	16
1	75	16
1	79	14
1	6	18
1	25	19
1	52	16
1	74	17
1	75	16
1	88	19
1	92	17
1	6	18
1	59	15
1	59	15
1	68	18
1	86	20
1	14	17
1	23	20
1	40	15
1	65	21
1	68	18
1	88	19
1	92	17
1	92	17
1	1	22
1	6	18
1	14	22
1	20	22
1	23	20
1	43	15
1	68	18
1	8	23
1	14	22
1	62	23
1	65	23
1	8	23
1	13	24
1	29	24
1	53	24
1	86	20
1	23	20
1	59	26
1	75	26
1	96	24
1	13	27
1	29	24
1	62	23
1	70	27
1	81	27
1	87	27
1	88	25
1	94	27
1	6	27
1	6	27
1	25	28
1	31	29
1	35	29
1	44	27
1	49	29
1	51	29
1	80	28
1	81	27
1	96	24
1	3	30
1	59	26
1	87	27
1	88	25
1	3	31
1	6	27
1	44	27
1	57	31
1	88	25
1	1	32
1	24	32
1	25	28
1	51	29
1	65	30
1	90	32
1	93	32
1	100	32
1	14	32
1	65	30
1	89	32
1	99	33
1	14	32
1	24	32
1	35	34
1	65	30
1	86	34
1	90	32
1	9	34
1	14	32
1	34	35
1	65	30
1	93	32
1	25	28
1	35	34
1	61	36
1	58	29
1	65	30
1	65	30
1	75	36
1	80	34
1	93	32
1	93	32
1	14	32
1	32	37
1	47	37
1	9	34
1	14	32
1	23	36
1	55	35
1	55	35
1	58	29
1	75	36
1	2	39
1	4	37
1	55	35
1	94	39
1	96	39
1	96	37
1	2	39
1	9	34
1	61	36
1	92	40
1	96	39
1	1	40
1	9	34
1	47	37
1	55	35
1	69	41
1	87	41
1	92	41
1	4	37
1	9	34
1	54	41
1	96	39
1	45	39
1	45	39
1	69	41
1	80	43
1	80	42
1	94	39
1	94	39
1	94	39
1	96	39
1	45	39
1	54	41
1	80	42
1	8	45
1	30	45
1	32	45
1	45	39
1	100	45
1	1	46
1	18	46
1	72	46
1	75	41
1	80	42
1	30	47
1	1	46
1	58	47
1	87	48
1	13	49
1	45	45
1	65	49
1	78	49
1	1	46
1	1	46
1	6	48
1	58	47
1	65	49
1	5	51
1	25	49
1	46	51
1	58	47
1	70	48
1	70	48
1	13	49
1	43	51
1	45	45
1	89	48
1	94	49
1	99	52
1	6	48
1	35	50
1	72	53
1	94	49
1	69	54
1	70	53
1	5	51
1	23	52
1	84	52
1	67	55
1	21	57
1	35	50
1	57	57
1	72	53
1	84	52
1	92	53
1	3	54
1	16	58
1	18	58
1	23	52
1	35	50
1	47	58
1	3	54
1	23	52
1	67	55
1	76	58
1	92	53
1	16	58
1	35	50
1	92	53
1	3	54
1	51	57
1	75	61
1	76	58
1	84	61
1	3	54
1	20	58
1	26	62
1	47	58
1	75	62
1	39	63
1	45	63
1	90	63
1	91	63
1	92	63
1	18	64
1	20	58
1	30	61
1	61	64
1	74	64
1	83	64
1	90	63
1	6	64
1	20	58
1	40	61
1	50	65
1	33	66
1	83	64
1	92	63
1	50	65
1	55	65
1	61	67
1	91	63
1	6	64
1	38	68
1	44	68
1	95	68
1	5	66
1	81	67
1	5	66
1	50	70
1	51	70
1	52	70
1	70	70
1	72	70
1	90	70
1	17	70
1	31	68
1	33	68
1	51	70
1	55	65
1	79	71
1	81	67
1	81	67
1	1	72
1	5	66
1	5	66
1	31	68
1	44	68
1	66	72
1	81	67
1	87	70
1	95	68
1	15	73
1	22	70
1	35	73
1	50	73
1	87	73
1	43	74
1	1	72
1	7	72
1	17	70
1	22	70
1	71	75
1	73	75
1	79	71
1	87	70
1	42	76
1	57	75
1	65	76
1	77	72
1	87	70
1	43	69
1	57	75
1	71	75
1	86	77
1	87	77
1	23	78
1	24	78
1	55	78
1	73	75
1	23	78
1	40	79
1	55	78
1	73	75
1	77	72
1	77	72
1	6	76
1	38	80
1	95	74
1	20	81
1	19	82
1	62	81
1	62	81
1	67	82
1	20	81
1	48	79
1	62	81
1	84	81
1	85	78
1	85	78
1	1	82
1	32	84
1	62	84
1	16	85
1	16	83
1	27	85
1	48	79
1	85	78
1	1	82
1	12	85
1	24	86
1	35	84
1	47	82
1	48	79
1	73	82
1	79	84
1	1	82
1	9	87
1	10	87
1	86	88
1	10	87
1	12	85
1	27	85
1	37	89
1	35	84
1	53	88
1	73	82
1	79	84
1	66	90
1	98	90
1	15	91
1	12	85
1	29	90
1	47	88
1	53	88
1	53	88
1	21	92
1	24	88
1	24	88
1	29	90
1	37	89
1	79	91
1	96	91
1	21	92
1	45	93
1	74	93
1	73	88
1	91	93
1	6	93
1	15	91
1	42	93
1	45	93
1	53	88
1	91	93
1	21	92
1	41	95
1	45	93
1	45	93
1	69	95
1	73	95
1	69	95
1	82	96
1	21	94
1	27	97
1	40	97
1	42	93
1	61	95
1	69	95
1	69	95
1	87	96
1	8	98
1	6	93
1	28	97
1	42	93
1	52	98
1	55	98
1	58	96
1	73	95
1	58	96
1	21	94
1	52	98
2	2	1
2	59	1
2	74	1
2	77	1
2	86	1
2	9	1
2	36	1
2	64	2
2	66	1
2	70	1
2	77	1
2	91	2
2	9	1
2	9	1
2	12	1
2	30	3
2	36	3
2	39	1
2	66	1
2	9	1
2	59	1
2	12	1
2	18	2
2	25	5
2	43	1
2	43	1
2	49	5
2	74	1
2	86	4
2	97	5
2	26	3
2	26	3
2	36	1
2	43	1
2	64	2
2	97	3
2	4	7
2	22	7
2	24	7
2	30	3
2	41	7
2	51	3
2	80	6
2	91	6
2	7	6
2	12	7
2	22	7
2	31	8
2	41	7
2	50	4
2	63	8
2	1	7
2	12	7
2	16	6
2	41	7
2	54	9
2	76	7
2	41	7
2	63	8
2	45	12
2	54	9
2	87	12
2	90	10
2	25	13
2	43	1
2	43	1
2	50	10
2	63	8
2	73	11
2	90	11
2	6	14
2	50	10
2	63	8
2	70	11
2	81	14
2	83	14
2	86	14
2	25	13
2	40	15
2	50	10
2	79	15
2	83	14
2	1	16
2	1	7
2	13	17
2	14	17
2	40	15
2	40	15
2	62	10
2	92	17
2	6	18
2	92	18
2	31	12
2	92	17
2	14	17
2	23	20
2	25	13
2	31	12
2	43	15
2	6	18
2	82	21
2	83	21
2	88	19
2	41	22
2	82	21
2	88	19
2	1	22
2	25	19
2	23	20
2	32	24
2	62	23
2	81	23
2	82	21
2	96	24
2	97	21
2	19	25
2	20	22
2	38	25
2	62	23
2	37	26
2	49	24
2	87	26
2	96	24
2	96	24
2	6	27
2	53	24
2	59	27
2	81	27
2	81	23
2	87	26
2	25	28
2	38	25
2	68	28
2	70	27
2	80	28
2	81	27
2	4	29
2	59	26
2	73	26
2	65	30
2	2	31
2	3	30
2	18	31
2	31	29
2	70	27
2	87	27
2	3	30
2	3	30
2	44	32
2	44	27
2	89	32
2	18	31
2	24	32
2	58	29
2	89	33
2	3	30
2	9	34
2	80	34
2	90	32
2	90	32
2	3	31
2	57	31
2	86	34
2	93	32
2	35	34
2	58	29
2	78	36
2	4	37
2	9	34
2	23	36
2	96	37
2	23	36
2	23	36
2	39	39
2	55	35
2	80	34
2	4	37
2	23	36
2	23	36
2	32	37
2	47	37
2	75	36
2	92	40
2	94	39
2	55	35
2	67	41
2	25	42
2	45	39
2	85	42
2	1	43
2	39	39
2	45	39
2	55	35
2	61	43
2	92	43
2	33	44
2	35	44
2	75	41
2	35	44
2	45	45
2	60	45
2	69	41
2	80	43
2	19	46
2	25	42
2	45	45
2	45	39
2	30	47
2	58	47
2	100	47
2	45	45
2	60	45
2	60	45
2	65	48
2	67	48
2	70	48
2	78	48
2	89	48
2	25	49
2	29	49
2	30	45
2	55	49
2	58	47
2	58	47
2	94	49
2	99	49
2	1	46
2	18	50
2	29	49
2	75	41
2	6	48
2	30	47
2	43	51
2	70	48
2	5	51
2	25	49
2	35	50
2	78	49
2	84	52
2	6	48
2	12	53
2	35	50
2	45	45
2	55	49
2	57	49
2	85	49
2	89	48
2	23	52
2	35	50
2	51	54
2	85	49
2	46	51
2	46	51
2	58	55
2	67	55
2	89	48
2	3	54
2	3	54
2	12	53
2	23	56
2	23	52
2	51	56
2	84	52
2	3	54
2	12	53
2	23	52
2	34	54
2	51	57
2	51	54
2	57	57
2	1	58
2	3	54
2	13	58
2	20	58
2	43	58
2	76	58
2	77	56
2	95	58
2	3	54
2	1	58
2	3	54
2	16	58
2	34	60
2	1	61
2	1	58
2	40	61
2	35	50
2	57	57
2	76	58
2	6	61
2	34	60
2	61	62
2	76	58
2	20	63
2	40	61
2	74	63
2	84	61
2	91	63
2	6	64
2	11	61
2	26	62
2	34	60
2	39	63
2	61	62
2	75	61
2	89	64
2	6	64
2	11	61
2	11	61
2	5	66
2	50	65
2	18	64
2	28	68
2	31	68
2	33	68
2	97	68
2	16	70
2	22	70
2	24	69
2	89	70
2	22	71
2	70	70
2	17	70
2	17	70
2	28	68
2	58	72
2	72	70
2	77	72
2	87	70
2	95	68
2	1	72
2	17	70
2	31	68
2	43	69
2	51	70
2	7	72
2	14	74
2	15	73
2	15	73
2	66	72
2	77	74
2	79	71
2	17	70
2	17	70
2	33	75
2	66	72
2	6	76
2	15	73
2	35	73
2	50	73
2	56	76
2	6	77
2	35	73
2	77	72
2	77	72
2	87	73
2	95	74
2	6	76
2	7	72
2	27	78
2	56	78
2	65	76
2	86	77
2	86	77
2	4	79
2	6	76
2	24	78
2	40	79
2	48	79
2	86	77
2	94	75
2	95	74
2	38	80
2	43	69
2	77	72
2	77	72
2	6	77
2	19	81
2	55	78
2	62	81
2	84	81
2	1	82
2	6	76
2	27	78
2	40	79
2	48	82
2	55	78
2	62	81
2	85	78
2	4	79
2	57	83
2	62	81
2	81	81
2	16	83
2	62	81
2	79	84
2	27	83
2	57	83
2	67	82
2	79	84
2	85	78
2	12	85
2	16	85
2	19	82
2	35	84
2	48	79
2	72	83
2	78	86
2	79	84
2	98	86
2	12	85
2	16	83
2	48	79
2	73	82
2	91	87
2	85	78
2	9	87
2	10	87
2	16	83
2	24	86
2	24	86
2	35	89
2	53	88
2	67	87
2	12	85
2	29	90
2	35	84
2	47	82
2	53	88
2	60	90
2	60	88
2	60	88
2	67	90
2	85	90
2	86	88
2	91	90
2	91	87
2	98	90
2	29	90
2	32	90
2	53	88
2	67	87
2	73	88
2	96	91
2	29	90
2	85	90
2	91	90
2	6	93
2	42	93
2	47	88
2	60	88
2	66	90
2	79	91
2	21	92
2	29	90
2	32	90
2	42	93
2	60	88
2	91	93
2	6	93
2	24	88
2	29	90
2	45	93
2	61	95
2	71	95
2	73	88
2	96	95
2	29	90
2	41	95
2	42	93
2	58	96
2	61	95
2	79	91
2	87	96
2	1	97
2	58	96
2	87	96
2	21	98
2	50	98
2	1	97
2	8	98
2	28	97
2	82	96
2	6	100
2	13	97
2	34	97
2	46	99
2	61	95
3	9	1
3	36	1
3	43	1
3	70	1
3	2	1
3	7	2
3	9	1
3	57	1
3	66	2
3	100	2
3	29	3
3	2	1
3	18	2
3	30	3
3	56	4
3	64	2
3	64	2
3	70	1
3	74	1
3	97	3
3	7	6
3	18	2
3	36	1
3	63	6
3	91	6
3	91	2
3	1	7
3	7	6
3	12	7
3	22	7
3	30	3
3	43	1
3	63	6
3	76	7
3	22	7
3	41	7
3	43	1
3	56	4
3	63	6
3	75	8
3	80	6
3	4	7
3	16	6
3	91	6
3	7	6
3	22	7
3	22	7
3	31	8
3	50	10
3	62	10
3	90	10
3	19	11
3	20	11
3	31	11
3	36	10
3	36	10
3	41	7
3	43	1
3	43	1
3	50	10
3	76	7
3	91	6
3	1	10
3	20	11
3	31	12
3	36	10
3	44	12
3	54	9
3	54	9
3	1	10
3	14	14
3	17	14
3	50	10
3	73	11
3	1	7
3	43	15
3	59	15
3	100	15
3	14	14
3	30	16
3	31	12
3	52	16
3	56	16
3	63	8
3	69	16
3	78	16
3	1	7
3	1	7
3	14	14
3	25	13
3	35	17
3	52	16
3	56	16
3	59	15
3	62	10
3	62	10
3	79	14
3	86	14
3	1	18
3	6	14
3	26	18
3	35	18
3	48	18
3	75	16
3	79	14
3	81	14
3	92	18
3	90	19
3	91	19
3	92	19
3	43	15
3	69	16
3	86	20
3	6	18
3	97	21
3	20	22
3	41	22
3	86	20
3	92	18
3	92	18
3	1	22
3	19	23
3	32	23
3	38	23
3	61	23
3	81	23
3	8	23
3	49	24
3	62	23
3	81	23
3	8	23
3	20	22
3	41	22
3	88	25
3	13	24
3	20	22
3	37	26
3	38	26
3	38	25
3	62	23
3	65	23
3	73	26
3	81	23
3	32	24
3	44	27
3	65	23
3	81	23
3	13	24
3	29	24
3	73	26
3	13	27
3	13	27
3	49	24
3	58	29
3	87	27
3	96	24
3	59	26
3	94	27
3	81	27
3	88	25
3	14	32
3	18	31
3	65	30
3	89	32
3	44	32
3	93	32
3	11	34
3	41	34
3	65	30
3	85	34
3	98	34
3	99	33
3	9	35
3	25	28
3	33	35
3	35	34
3	55	35
3	23	36
3	35	34
3	55	35
3	58	29
3	86	34
3	90	32
3	93	32
3	98	36
3	4	37
3	54	37
3	16	38
3	30	38
3	35	34
3	54	37
3	96	38
3	30	38
3	34	35
3	45	39
3	54	37
3	80	34
3	1	40
3	4	37
3	4	37
3	9	34
3	16	40
3	45	39
3	54	37
3	55	35
3	69	40
3	39	39
3	45	39
3	54	41
3	75	41
3	94	39
3	80	42
3	87	41
3	80	43
3	80	42
3	10	44
3	12	44
3	16	40
3	80	43
3	45	45
3	80	43
3	30	45
3	40	46
3	92	43
3	12	44
3	18	46
3	89	47
3	6	48
3	7	48
3	60	45
3	69	48
3	89	47
3	13	49
3	18	49
3	18	46
3	56	49
3	57	49
3	72	46
3	85	49
3	35	50
3	45	45
3	53	50
3	54	50
3	18	50
3	25	49
3	46	51
3	65	49
3	94	49
3	18	50
3	23	52
3	25	49
3	5	51
3	13	49
3	35	50
3	45	45
3	57	49
3	70	53
3	92	53
3	89	48
3	3	54
3	34	54
3	46	51
3	70	54
3	70	53
3	84	52
3	94	49
3	23	52
3	89	48
3	3	54
3	3	54
3	23	52
3	77	56
3	21	57
3	48	57
3	84	57
3	57	57
3	84	52
3	96	58
3	3	54
3	3	54
3	18	58
3	23	52
3	40	59
3	43	58
3	51	56
3	67	55
3	95	59
3	1	58
3	47	58
3	51	56
3	57	57
3	67	55
3	94	60
3	6	61
3	11	61
3	30	61
3	31	61
3	76	58
3	1	58
3	26	62
3	27	62
3	34	60
3	39	62
3	34	60
3	61	62
3	6	61
3	6	61
3	39	63
3	61	62
3	68	64
3	89	64
3	18	64
3	30	61
3	30	61
3	38	65
3	55	65
3	67	65
3	6	64
3	11	61
3	50	65
3	83	64
3	18	64
3	81	67
3	1	68
3	40	61
3	55	65
3	99	68
3	24	69
3	38	69
3	38	68
3	43	69
3	44	69
3	17	70
3	24	69
3	38	68
3	61	70
3	71	70
3	87	70
3	90	70
3	1	68
3	66	71
3	90	70
3	7	72
3	17	70
3	90	70
3	95	68
3	1	72
3	17	70
3	24	69
3	38	69
3	90	70
3	17	70
3	22	70
3	34	74
3	44	74
3	95	74
3	57	75
3	58	72
3	66	72
3	76	75
3	79	71
3	87	70
3	94	75
3	7	76
3	7	72
3	7	72
3	43	69
3	58	72
3	66	72
3	95	74
3	95	74
3	6	77
3	73	75
3	77	72
3	95	74
3	33	78
3	43	69
3	71	75
3	85	78
3	87	77
3	3	79
3	57	75
3	95	74
3	6	76
3	27	78
3	33	78
3	85	78
3	1	81
3	23	78
3	43	69
3	56	78
3	81	81
3	3	79
3	19	82
3	47	82
3	55	78
3	55	78
3	73	82
3	81	81
3	16	83
3	27	83
3	48	79
3	72	83
3	73	82
3	84	81
3	1	82
3	20	81
3	27	83
3	35	84
3	37	84
3	12	85
3	15	85
3	62	81
3	78	85
3	10	86
3	32	84
3	81	81
3	81	81
3	16	83
3	27	85
3	62	84
3	67	87
3	98	87
3	9	87
3	12	85
3	16	85
3	24	88
3	27	83
3	47	88
3	53	88
3	60	88
3	73	88
3	73	82
3	79	84
3	53	88
3	86	89
3	12	85
3	32	90
3	67	90
3	73	82
3	24	88
3	37	89
3	53	88
3	53	88
3	79	91
3	85	90
3	12	85
3	29	90
3	37	89
3	91	90
3	96	91
3	12	85
3	24	88
3	66	90
3	74	93
3	79	91
3	21	94
3	24	88
3	24	88
3	68	95
3	79	91
3	89	95
3	21	92
3	79	91
3	89	95
3	13	97
3	15	97
3	28	97
3	34	97
3	69	95
3	1	97
3	13	98
3	34	97
3	51	98
3	67	98
3	87	96
3	89	95
3	21	94
3	27	97
3	27	97
3	41	95
3	46	99
3	69	95
3	96	95
3	1	100
3	21	94
3	28	97
3	34	97
3	50	98
3	52	98
3	79	100

## Sheet: Sheet2
1	50	1
1	61	1
1	68	1
1	69	1
1	72	1
1	99	1
1	5	2
1	45	2
1	68	1
1	82	2
1	98	1
1	60	3
1	11	1
1	23	4
1	24	4
1	31	1
1	40	2
1	23	4
1	31	1
1	50	1
1	72	1
1	82	2
1	84	1
1	88	1
1	19	6
1	23	4
1	67	6
1	75	6
1	78	6
1	29	3
1	40	7
1	67	6
1	84	1
1	88	1
1	1	8
1	10	7
1	29	3
1	49	8
1	55	5
1	73	6
1	84	7
1	84	1
1	25	9
1	34	7
1	34	7
1	84	7
1	49	8
1	65	10
1	73	6
1	96	10
1	65	10
1	72	8
1	73	6
1	96	11
1	10	11
1	31	8
1	82	12
1	83	12
1	96	12
1	8	13
1	23	13
1	34	7
1	65	10
1	3	14
1	65	10
1	8	13
1	31	15
1	56	15
1	82	12
1	89	14
1	96	12
1	8	13
1	51	17
1	62	12
1	8	18
1	18	16
1	24	18
1	28	18
1	41	14
1	43	14
1	62	12
1	70	14
1	80	18
1	80	14
1	93	14
1	34	15
1	62	12
1	89	17
1	8	18
1	11	18
1	42	20
1	70	20
1	70	16
1	89	17
1	93	14
1	93	14
1	11	18
1	51	17
1	70	14
1	8	18
1	24	18
1	34	15
1	70	20
1	78	21
1	80	18
1	80	14
1	98	22
1	12	23
1	20	23
1	35	23
1	34	15
1	48	23
1	61	22
1	63	22
1	70	20
1	78	21
1	88	23
1	89	17
1	23	23
1	61	22
1	4	23
1	23	23
1	41	21
1	57	22
1	61	22
1	76	26
1	94	24
1	98	22
1	33	27
1	41	21
1	41	21
1	76	26
1	78	23
1	88	23
1	1	28
1	11	25
1	57	22
1	86	28
1	33	27
1	51	29
1	53	22
1	75	29
1	78	23
1	86	28
1	1	28
1	78	26
1	86	28
1	11	25
1	46	31
1	53	22
1	72	31
1	91	30
1	17	32
1	18	32
1	38	30
1	98	32
1	5	33
1	19	29
1	25	33
1	26	33
1	29	30
1	38	30
1	72	31
1	91	33
1	1	34
1	10	34
1	19	29
1	51	30
1	65	32
1	98	34
1	25	33
1	36	35
1	38	35
1	64	35
1	65	32
1	77	34
1	86	31
1	91	30
1	5	33
1	17	32
1	19	29
1	48	36
1	64	36
1	86	32
1	19	29
1	25	33
1	26	33
1	38	35
1	77	34
1	10	34
1	38	35
1	47	38
1	48	36
1	51	30
1	98	34
1	44	39
1	64	35
1	2	40
1	17	39
1	17	39
1	25	40
1	35	39
1	78	40
1	1	41
1	2	41
1	57	38
1	78	41
1	84	39
1	9	39
1	17	39
1	57	38
1	34	40
1	64	41
1	84	39
1	9	39
1	17	39
1	35	39
1	2	41
1	7	42
1	57	45
1	57	38
1	57	38
1	78	45
1	83	45
1	15	46
1	44	45
1	71	42
1	86	45
1	1	44
1	83	45
1	37	48
1	78	45
1	15	46
1	37	48
1	42	49
1	67	46
1	92	46
1	27	50
1	28	48
1	37	50
1	52	43
1	67	46
1	81	50
1	10	51
1	27	50
1	27	50
1	49	51
1	63	51
1	81	50
1	20	50
1	50	48
1	52	43
1	67	46
1	79	52
1	81	50
1	81	50
1	42	49
1	73	51
1	73	51
1	88	51
1	20	50
1	47	54
1	52	43
1	73	51
1	81	50
1	8	52
1	16	55
1	42	53
1	68	53
1	88	51
1	20	50
1	40	56
1	2	55
1	7	57
1	21	55
1	32	53
1	55	57
1	63	54
1	68	53
1	1	58
1	16	55
1	58	57
1	8	52
1	14	59
1	16	55
1	30	55
1	48	59
1	94	59
1	1	60
1	2	55
1	30	55
1	55	57
1	73	60
1	76	58
1	81	60
1	99	60
1	14	61
1	21	55
1	46	61
1	63	54
1	72	61
1	94	59
1	12	62
1	27	58
1	58	62
1	58	57
1	76	58
1	21	61
1	41	63
1	91	63
1	39	64
1	69	61
1	91	64
1	7	63
1	21	61
1	43	61
1	58	62
1	98	65
1	21	61
1	51	66
1	69	61
1	98	65
1	17	67
1	19	67
1	20	67
1	69	61
1	82	67
1	24	66
1	66	68
1	67	65
1	98	68
1	17	67
1	51	66
1	66	68
1	77	66
1	82	67
1	4	70
1	11	70
1	38	66
1	51	66
1	66	68
1	82	67
1	24	66
1	36	71
1	38	66
1	40	64
1	60	71
1	76	71
1	79	71
1	16	72
1	58	72
1	60	72
1	96	72
1	11	70
1	23	73
1	36	73
1	47	73
1	60	71
1	75	73
1	88	71
1	65	73
1	68	73
1	73	74
1	87	74
1	88	71
1	16	75
1	30	73
1	44	75
1	52	75
1	65	75
1	81	71
1	86	75
1	87	74
1	87	74
1	88	71
1	8	76
1	28	76
1	30	73
1	36	73
1	58	72
1	58	72
1	58	72
1	68	73
1	75	73
1	96	72
1	16	77
1	47	73
1	65	77
1	73	74
1	75	73
1	88	71
1	73	74
1	95	78
1	8	76
1	30	73
1	50	79
1	58	79
1	81	76
1	1	80
1	15	80
1	35	80
1	65	77
1	26	79
1	57	79
1	90	81
1	26	79
1	41	79
1	61	78
1	76	82
1	1	83
1	8	83
1	10	83
1	26	79
1	35	80
1	41	79
1	55	83
1	58	79
1	90	81
1	15	80
1	84	84
1	1	83
1	8	83
1	10	83
1	20	85
1	95	85
1	1	83
1	15	83
1	34	84
1	55	83
1	72	86
1	91	86
1	93	86
1	34	84
1	39	86
1	57	83
1	3	88
1	20	85
1	78	88
1	84	84
1	90	88
1	3	88
1	15	88
1	20	85
1	48	89
1	57	83
1	69	89
1	2	90
1	12	90
1	61	90
1	57	83
1	78	88
1	93	86
1	3	88
1	12	90
1	15	88
1	52	89
1	84	87
1	89	91
1	37	92
1	48	89
1	61	90
1	97	92
1	2	90
1	24	93
1	37	92
1	48	89
1	37	92
1	71	94
1	86	94
1	84	87
1	37	92
1	52	89
1	64	95
1	16	96
1	60	96
1	61	96
1	86	94
1	7	93
1	43	96
1	48	94
1	75	94
1	24	94
1	30	97
1	30	97
1	71	94
1	95	96
1	95	96
1	16	96
1	48	94
1	69	95
1	75	94
1	24	94
1	30	97
1	30	97
1	57	100
2	62	1
2	67	1
2	84	1
2	61	1
2	68	1
2	69	1
2	97	2
2	11	1
2	29	3
2	72	1
2	11	1
2	72	1
2	79	4
2	94	3
2	11	1
2	19	5
2	23	4
2	55	5
2	60	5
2	68	1
2	5	2
2	60	3
2	88	1
2	10	7
2	23	4
2	34	7
2	65	7
2	84	7
2	88	1
2	3	8
2	4	8
2	11	1
2	23	4
2	31	8
2	52	7
2	73	6
2	49	9
2	55	5
2	78	6
2	44	7
2	49	10
2	65	7
2	78	6
2	10	11
2	10	7
2	34	7
2	52	7
2	83	11
2	84	7
2	44	12
2	83	11
2	34	7
2	39	9
2	44	7
2	62	12
2	74	13
2	73	6
2	84	7
2	10	11
2	41	14
2	70	14
2	3	14
2	23	13
2	31	8
2	54	15
2	56	14
2	93	14
2	18	16
2	23	13
2	23	13
2	31	15
2	54	15
2	62	12
2	89	14
2	3	14
2	14	17
2	62	12
2	87	17
2	89	17
2	2	18
2	24	18
2	79	18
2	89	14
2	8	18
2	31	15
2	34	15
2	62	12
2	70	16
2	70	14
2	28	18
2	70	16
2	70	14
2	98	20
2	8	18
2	41	21
2	51	17
2	78	21
2	61	22
2	78	21
2	89	17
2	93	14
2	14	23
2	11	18
2	23	23
2	24	23
2	53	22
2	61	22
2	78	23
2	20	23
2	40	24
2	88	24
2	88	23
2	11	25
2	53	25
2	53	22
2	4	23
2	40	26
2	40	24
2	86	26
2	2	27
2	12	23
2	23	23
2	41	21
2	63	22
2	75	27
2	93	27
2	94	24
2	94	24
2	19	28
2	33	27
2	86	26
2	76	26
2	78	23
2	10	30
2	29	30
2	40	26
2	51	30
2	72	30
2	86	28
2	93	27
2	49	31
2	50	31
2	78	23
2	86	31
2	19	28
2	51	29
2	65	32
2	78	26
2	86	32
2	1	33
2	29	30
2	38	34
2	38	30
2	57	34
2	58	34
2	77	34
2	97	34
2	1	35
2	17	35
2	77	35
2	77	34
2	5	33
2	17	32
2	19	29
2	36	35
2	38	30
2	51	36
2	51	30
2	38	35
2	64	35
2	64	35
2	86	34
2	86	34
2	17	35
2	28	38
2	29	38
2	48	36
2	35	39
2	56	39
2	57	38
2	64	35
2	84	39
2	86	31
2	96	39
2	96	36
2	96	36
2	9	39
2	28	38
2	28	38
2	64	36
2	82	40
2	96	40
2	2	40
2	28	38
2	64	41
2	2	40
2	7	42
2	9	39
2	44	39
2	69	42
2	93	42
2	17	39
2	25	40
2	25	40
2	35	39
2	44	39
2	44	39
2	64	41
2	96	39
2	2	40
2	18	44
2	25	40
2	30	44
2	31	44
2	57	44
2	1	41
2	17	45
2	28	45
2	45	45
2	57	38
2	64	41
2	84	39
2	7	42
2	45	45
2	57	45
2	67	46
2	92	46
2	15	47
2	30	44
2	52	43
2	73	47
2	15	48
2	28	48
2	28	45
2	31	44
2	50	48
2	57	45
2	64	48
2	78	45
2	83	45
2	92	46
2	27	49
2	37	48
2	63	49
2	71	42
2	86	45
2	15	50
2	20	50
2	34	50
2	36	50
2	63	50
2	10	51
2	55	51
2	56	51
2	67	46
2	67	46
2	8	52
2	42	49
2	88	51
2	88	51
2	42	49
2	50	48
2	63	51
2	68	53
2	52	43
2	63	54
2	63	51
2	10	51
2	88	51
2	16	55
2	32	53
2	68	56
2	87	56
2	88	51
2	32	53
2	40	56
2	58	57
2	94	57
2	21	55
2	30	55
2	32	53
2	63	54
2	68	53
2	76	58
2	84	56
2	88	51
2	8	52
2	30	55
2	58	57
2	75	59
2	84	59
2	88	51
2	21	55
2	40	56
2	53	60
2	55	57
2	84	59
2	93	60
2	99	60
2	21	61
2	84	56
2	1	62
2	1	58
2	27	58
2	69	61
2	99	60
2	1	60
2	21	61
2	53	60
2	58	62
2	73	60
2	81	60
2	94	59
2	99	63
2	52	64
2	58	62
2	91	63
2	7	65
2	67	65
2	12	62
2	31	66
2	38	66
2	77	66
2	83	66
2	86	65
2	4	67
2	7	63
2	7	63
2	29	67
2	41	63
2	17	67
2	20	67
2	39	64
2	40	64
2	77	66
2	86	65
2	51	66
2	40	64
2	66	68
2	77	66
2	83	66
2	98	70
2	1	71
2	11	70
2	67	65
2	88	71
2	98	68
2	36	71
2	58	72
2	16	72
2	16	72
2	30	73
2	32	73
2	75	73
2	30	73
2	30	73
2	40	64
2	52	74
2	16	72
2	23	73
2	41	75
2	44	74
2	52	74
2	1	75
2	52	76
2	52	75
2	58	72
2	73	74
2	80	76
2	81	76
2	1	75
2	44	75
2	75	73
2	87	74
2	28	78
2	80	76
2	1	75
2	22	79
2	26	79
2	52	75
2	57	79
2	95	79
2	16	80
2	77	80
2	92	79
2	15	81
2	22	79
2	57	81
2	26	79
2	26	79
2	41	79
2	41	79
2	47	82
2	58	79
2	61	78
2	81	76
2	26	79
2	26	79
2	26	79
2	57	83
2	58	79
2	72	83
2	76	82
2	81	76
2	90	81
2	1	80
2	41	79
2	41	79
2	55	84
2	63	84
2	61	78
2	100	84
2	54	85
2	61	78
2	61	78
2	90	81
2	6	86
2	26	79
2	26	79
2	39	86
2	20	85
2	30	87
2	31	87
2	34	84
2	62	87
2	84	87
2	84	84
2	4	88
2	25	88
2	39	86
2	39	86
2	80	88
2	15	88
2	49	89
2	57	83
2	90	88
2	52	89
2	58	90
2	72	86
2	91	86
2	34	84
2	52	89
2	57	83
2	1	92
2	2	90
2	50	89
2	69	89
2	78	88
2	12	90
2	30	93
2	97	92
2	97	92
2	20	94
2	24	94
2	69	94
2	81	94
2	84	87
2	1	95
2	48	94
2	52	89
2	69	95
2	71	94
2	75	94
2	84	87
2	1	96
2	20	96
2	20	94
2	43	96
2	47	96
2	48	94
2	50	89
2	50	89
2	50	89
2	95	96
2	7	93
2	30	97
2	43	96
2	60	96
2	16	96
2	95	96
2	92	99
2	93	99
2	1	96
2	7	93
2	25	100
2	61	96
2	82	100
3	11	1
3	31	1
3	62	1
3	88	1
3	98	1
3	36	2
3	40	2
3	55	2
3	11	1
3	40	2
3	50	1
3	55	3
3	68	1
3	72	1
3	94	3
3	24	4
3	40	2
3	50	1
3	68	1
3	82	2
3	5	2
3	5	2
3	11	1
3	31	1
3	60	5
3	29	3
3	55	5
3	66	6
3	73	6
3	82	2
3	98	1
3	11	1
3	40	7
3	44	7
3	52	7
3	60	3
3	73	6
3	19	8
3	52	7
3	72	8
3	73	6
3	75	6
3	84	1
3	31	9
3	39	9
3	49	9
3	1	8
3	4	8
3	97	10
3	10	7
3	10	7
3	19	8
3	25	9
3	25	9
3	29	3
3	40	7
3	96	10
3	44	7
3	49	8
3	62	12
3	65	10
3	96	10
3	4	13
3	25	9
3	44	7
3	80	13
3	84	7
3	96	10
3	43	14
3	44	12
3	44	7
3	56	14
3	80	14
3	89	14
3	93	14
3	3	15
3	8	13
3	23	13
3	34	15
3	44	12
3	53	15
3	3	14
3	10	11
3	23	13
3	31	8
3	56	15
3	70	16
3	89	14
3	3	17
3	3	14
3	23	13
3	53	15
3	63	17
3	62	12
3	89	14
3	89	14
3	89	14
3	3	14
3	11	18
3	14	17
3	51	17
3	62	12
3	70	14
3	11	18
3	41	14
3	54	15
3	56	15
3	56	14
3	87	17
3	93	14
3	34	15
3	41	14
3	51	17
3	70	20
3	70	16
3	79	18
3	98	20
3	11	18
3	24	18
3	28	18
3	34	15
3	41	21
3	42	20
3	62	12
3	70	21
3	89	17
3	24	18
3	53	22
3	57	22
3	63	22
3	4	23
3	68	23
3	4	23
3	11	18
3	20	23
3	53	22
3	94	24
3	96	24
3	97	24
3	23	23
3	35	23
3	41	21
3	53	22
3	98	22
3	2	26
3	12	23
3	78	26
3	88	23
3	94	24
3	4	23
3	40	24
3	68	23
3	88	23
3	94	24
3	24	28
3	53	25
3	88	24
3	88	24
3	11	25
3	19	29
3	23	23
3	30	29
3	53	25
3	57	22
3	93	27
3	94	24
3	33	27
3	38	30
3	53	22
3	72	30
3	91	30
3	19	28
3	51	29
3	53	22
3	78	23
3	1	28
3	1	28
3	24	28
3	38	30
3	53	22
3	75	29
3	91	32
3	10	30
3	53	22
3	1	33
3	26	33
3	81	34
3	86	34
3	91	34
3	38	35
3	72	31
3	19	29
3	38	30
3	51	30
3	96	36
3	19	29
3	48	37
3	57	34
3	77	34
3	51	30
3	57	38
3	65	32
3	86	34
3	96	36
3	9	39
3	17	39
3	48	36
3	57	38
3	83	39
3	7	40
3	34	40
3	47	38
3	56	39
3	1	42
3	9	39
3	35	39
3	47	38
3	57	38
3	64	41
3	71	42
3	25	40
3	32	43
3	33	43
3	34	40
3	52	43
3	56	39
3	57	38
3	78	40
3	84	39
3	1	44
3	2	40
3	35	39
3	64	41
3	93	44
3	93	42
3	17	39
3	30	45
3	44	45
3	83	45
3	86	45
3	9	39
3	45	45
3	64	41
3	78	45
3	100	46
3	15	46
3	64	41
3	73	47
3	78	45
3	18	44
3	57	45
3	7	42
3	43	49
3	44	45
3	64	48
3	83	45
3	67	46
3	67	46
3	50	48
3	50	48
3	73	51
3	88	51
3	90	51
3	93	51
3	7	52
3	15	48
3	15	48
3	28	48
3	64	48
3	81	50
3	32	53
3	28	48
3	37	50
3	42	53
3	63	51
3	78	53
3	88	51
3	7	54
3	32	54
3	50	48
3	63	54
3	63	51
3	73	51
3	79	52
3	2	55
3	7	52
3	16	55
3	21	55
3	30	55
3	32	53
3	7	56
3	7	52
3	21	55
3	39	56
3	50	48
3	68	53
3	84	56
3	88	51
3	16	57
3	16	55
3	61	57
3	2	55
3	27	58
3	30	55
3	16	55
3	30	55
3	40	56
3	55	57
3	58	57
3	76	58
3	40	56
3	47	60
3	48	59
3	53	60
3	84	59
3	22	61
3	43	61
3	63	54
3	69	61
3	84	59
3	94	59
3	14	59
3	21	55
3	30	55
3	46	61
3	58	57
3	72	61
3	7	63
3	31	63
3	76	58
3	92	63
3	1	60
3	7	64
3	7	63
3	21	61
3	40	64
3	69	61
3	73	60
3	76	58
3	76	58
3	88	64
3	98	64
3	99	64
3	12	62
3	14	61
3	21	61
3	38	65
3	46	61
3	52	64
3	58	65
3	86	65
3	88	65
3	7	63
3	24	66
3	31	66
3	66	67
3	86	65
3	17	68
3	37	68
3	51	69
3	77	66
3	20	67
3	81	71
3	82	67
3	11	70
3	24	66
3	77	66
3	11	70
3	65	73
3	68	73
3	10	74
3	30	73
3	38	66
3	38	66
3	44	74
3	52	74
3	54	74
3	60	71
3	1	75
3	65	73
3	88	71
3	96	72
3	32	73
3	73	74
3	75	73
3	97	77
3	30	73
3	41	75
3	52	78
3	52	75
3	61	78
3	73	74
3	81	76
3	97	77
3	25	79
3	28	79
3	41	79
3	44	75
3	44	74
3	86	75
3	92	79
3	22	79
3	41	79
3	58	79
3	65	77
3	92	79
3	15	80
3	22	82
3	41	79
3	92	79
3	1	80
3	11	83
3	15	83
3	41	79
3	76	83
3	10	83
3	34	84
3	43	84
3	57	79
3	61	78
3	7	85
3	39	85
3	40	85
3	55	83
3	61	78
3	76	82
3	90	81
3	15	83
3	26	79
3	41	79
3	41	79
3	54	85
3	57	83
3	57	83
3	63	86
3	61	78
3	90	86
3	34	84
3	63	87
3	90	86
3	12	88
3	15	88
3	20	85
3	30	87
3	72	88
3	25	88
3	34	84
3	50	89
3	52	89
3	71	89
3	95	85
3	15	83
3	15	83
3	25	88
3	48	89
3	91	86
3	93	86
3	15	88
3	30	91
3	30	87
3	31	87
3	39	86
3	39	86
3	48	89
3	52	89
3	62	87
3	84	87
3	12	90
3	61	90
3	69	89
3	99	92
3	1	93
3	7	93
3	12	90
3	37	92
3	71	89
3	1	92
3	48	94
3	75	94
3	88	94
3	50	89
3	1	92
3	43	96
3	43	96
3	48	94
3	7	93
3	29	98
3	42	98
3	60	96
3	71	94
3	95	96
3	95	96
3	57	99
3	69	95
3	84	99
3	95	99
3	16	96
3	20	96
3	20	96
3	30	97
3	43	96
3	57	99

## Sheet: Sheet3
1	18	1
1	32	1
1	36	1
1	45	1
1	14	2
1	45	1
1	52	2
1	53	1
1	76	2
1	86	2
1	24	3
1	26	2
1	29	1
1	29	1
1	43	3
1	50	3
1	92	3
1	93	3
1	86	2
1	18	1
1	53	1
1	81	1
1	4	6
1	29	1
1	49	6
1	53	1
1	65	4
1	71	5
1	71	1
1	86	2
1	4	6
1	39	7
1	43	4
1	53	1
1	34	9
1	47	9
1	71	5
1	79	8
1	81	1
1	6	6
1	34	10
1	49	6
1	63	10
1	93	9
1	2	11
1	21	11
1	23	11
1	29	11
1	33	11
1	45	11
1	43	4
1	84	8
1	90	9
1	2	11
1	21	11
1	58	12
1	90	9
1	6	6
1	23	11
1	79	8
1	6	6
1	16	14
1	23	11
1	45	11
1	63	14
1	7	13
1	40	15
1	82	15
1	15	16
1	23	16
1	7	13
1	50	17
1	63	14
1	21	18
1	59	18
1	87	16
1	2	19
1	4	19
1	49	19
1	74	17
1	87	16
1	1	20
1	6	17
1	68	19
1	81	18
1	97	19
1	2	19
1	6	17
1	16	21
1	40	20
1	50	17
1	81	18
1	89	21
1	2	19
1	18	21
1	89	22
1	97	19
1	1	20
1	16	21
1	18	21
1	27	23
1	40	20
1	49	23
1	81	18
1	1	20
1	1	20
1	61	24
1	87	24
1	9	24
1	39	20
1	40	20
1	49	23
1	55	24
1	73	25
1	81	22
1	89	21
1	99	25
1	5	25
1	9	24
1	9	24
1	27	23
1	48	26
1	61	24
1	89	22
1	5	25
1	55	24
1	63	24
1	81	22
1	1	26
1	48	28
1	48	26
1	53	28
1	55	24
1	63	24
1	79	28
1	81	22
1	39	20
1	48	26
1	48	26
1	55	24
1	55	24
1	62	29
1	63	24
1	91	29
1	92	29
1	99	25
1	26	27
1	33	29
1	47	30
1	91	29
1	19	28
1	40	27
1	25	31
1	40	27
1	69	32
1	15	33
1	25	31
1	69	32
1	91	29
1	3	34
1	4	31
1	15	34
1	15	33
1	15	33
1	16	31
1	47	30
1	47	30
1	53	34
1	53	31
1	83	34
1	10	31
1	59	31
1	69	35
1	15	33
1	16	31
1	46	36
1	83	34
1	15	33
1	33	37
1	46	36
1	53	31
1	21	38
1	16	31
1	51	36
1	51	36
1	53	34
1	69	35
1	9	39
1	33	37
1	46	39
1	69	35
1	83	39
1	95	39
1	3	41
1	30	37
1	33	37
1	60	39
1	82	41
1	3	41
1	21	42
1	21	38
1	44	41
1	60	42
1	91	42
1	93	42
1	3	41
1	55	43
1	88	43
1	8	44
1	30	37
1	88	43
1	21	42
1	55	43
1	76	45
1	77	45
1	91	42
1	8	44
1	35	46
1	91	42
1	38	45
1	77	45
1	99	47
1	16	48
1	21	45
1	92	48
1	1	49
1	2	45
1	7	47
1	67	46
1	79	45
1	85	49
1	1	49
1	51	50
1	65	47
1	67	46
1	67	46
1	67	46
1	97	50
1	38	45
1	65	47
1	91	51
1	7	47
1	31	49
1	51	50
1	92	48
1	7	47
1	7	47
1	20	53
1	31	53
1	57	53
1	91	51
1	91	51
1	45	54
1	57	54
1	65	47
1	81	51
1	81	51
1	8	55
1	19	55
1	31	49
1	44	55
1	45	54
1	81	51
1	99	55
1	19	55
1	61	48
1	72	55
1	98	55
1	25	57
1	30	57
1	31	53
1	55	55
1	62	56
1	97	57
1	8	55
1	19	55
1	62	57
1	62	56
1	80	57
1	99	55
1	2	57
1	19	55
1	30	57
1	62	57
1	61	48
1	9	60
1	24	60
1	30	57
1	38	60
1	88	60
1	92	59
1	97	57
1	15	60
1	62	56
1	75	61
1	80	61
1	80	57
1	92	59
1	38	60
1	62	62
1	62	57
1	37	63
1	44	63
1	56	63
1	80	57
1	92	59
1	1	61
1	11	60
1	38	60
1	50	59
1	62	62
1	80	57
1	9	65
1	11	60
1	11	60
1	56	63
1	62	62
1	75	61
1	88	65
1	90	65
1	15	60
1	56	63
1	67	66
1	86	66
1	30	63
1	44	63
1	62	65
1	1	61
1	11	60
1	15	60
1	25	66
1	30	63
1	50	59
1	62	65
1	9	65
1	18	69
1	25	66
1	86	66
1	8	69
1	49	69
1	57	70
1	60	70
1	74	66
1	79	70
1	94	70
1	3	68
1	29	65
1	49	69
1	76	71
1	98	67
1	2	72
1	8	69
1	14	70
1	18	69
1	2	72
1	81	66
1	22	74
1	24	71
1	29	65
1	49	74
1	74	74
1	81	66
1	22	75
1	39	71
1	48	75
1	91	71
1	2	72
1	15	76
1	22	74
1	83	76
1	39	71
1	39	71
1	8	78
1	74	74
1	74	74
1	83	76
1	92	78
1	8	79
1	22	79
1	22	75
1	32	77
1	71	77
1	83	76
1	91	79
1	99	77
1	20	80
1	22	80
1	71	77
1	71	77
1	84	76
1	90	80
1	98	80
1	4	81
1	32	77
1	42	81
1	60	80
1	68	81
1	71	77
1	3	81
1	68	81
1	1	82
1	54	79
1	54	79
1	1	82
1	12	84
1	14	82
1	33	82
1	54	79
1	80	84
1	14	82
1	68	81
1	68	81
1	80	84
1	96	85
1	22	86
1	33	82
1	45	86
1	53	86
1	54	79
1	80	84
1	17	87
1	14	82
1	33	82
1	54	79
1	54	79
1	14	82
1	87	84
1	34	89
1	53	86
1	17	87
1	43	90
1	46	86
1	55	86
1	76	90
1	73	85
1	81	90
1	5	89
1	31	90
1	40	90
1	43	90
1	46	86
1	73	85
1	85	87
1	31	90
1	52	88
1	57	92
1	73	85
1	87	84
1	96	92
1	29	93
1	40	90
1	46	86
1	46	86
1	96	92
1	5	89
1	5	89
1	13	94
1	71	94
1	76	90
1	4	95
1	13	94
1	17	94
1	48	95
1	85	87
1	4	96
1	41	96
1	48	95
1	63	94
1	70	95
1	71	94
1	84	96
1	13	94
1	29	93
1	40	96
1	48	97
1	50	93
1	57	97
1	13	94
1	17	94
1	36	97
1	48	98
1	63	94
1	63	94
1	69	96
1	71	94
1	77	98
1	83	98
1	4	95
1	17	94
1	53	99
1	70	95
1	89	97
1	96	95
1	77	98
2	36	1
2	77	1
2	81	1
2	97	1
2	15	2
2	51	2
2	53	1
2	71	1
2	71	1
2	77	1
2	86	2
2	23	3
2	32	1
2	53	1
2	92	3
2	10	2
2	24	3
2	26	2
2	43	4
2	52	2
2	26	2
2	50	3
2	71	1
2	81	1
2	65	4
2	4	6
2	10	2
2	38	7
2	49	7
2	71	1
2	2	8
2	37	8
2	39	7
2	43	4
2	71	1
2	79	8
2	81	1
2	4	6
2	6	6
2	43	4
2	53	1
2	65	4
2	93	9
2	2	10
2	65	4
2	84	8
2	90	9
2	2	8
2	25	11
2	28	11
2	75	11
2	84	8
2	93	9
2	2	11
2	16	12
2	29	11
2	90	9
2	7	13
2	58	12
2	84	8
2	90	9
2	90	9
2	1	14
2	42	14
2	52	14
2	54	14
2	58	12
2	63	10
2	82	14
2	2	11
2	21	11
2	23	11
2	33	11
2	58	12
2	69	15
2	75	11
2	40	15
2	6	17
2	7	13
2	63	17
2	69	15
2	50	18
2	81	18
2	5	19
2	34	19
2	40	15
2	59	18
2	63	17
2	68	19
2	97	19
2	15	16
2	23	16
2	40	20
2	87	16
2	87	16
2	97	19
2	28	21
2	30	21
2	50	17
2	68	21
2	74	17
2	81	18
2	2	19
2	64	22
2	81	18
2	16	23
2	18	21
2	39	20
2	49	19
2	56	23
2	68	19
2	9	24
2	6	17
2	26	24
2	28	21
2	40	20
2	55	24
2	81	22
2	89	21
2	5	25
2	8	25
2	9	24
2	40	20
2	49	23
2	81	22
2	99	25
2	1	26
2	16	23
2	21	26
2	49	23
2	54	24
2	64	22
2	73	25
2	16	23
2	27	23
2	55	24
2	5	25
2	21	26
2	39	20
2	63	24
2	33	29
2	53	28
2	63	24
2	73	25
2	79	29
2	79	28
2	1	26
2	21	26
2	84	30
2	10	31
2	25	31
2	26	27
2	33	29
2	1	26
2	16	31
2	33	29
2	33	29
2	41	32
2	53	28
2	91	32
2	25	31
2	40	27
2	53	29
2	59	31
2	62	29
2	84	30
2	3	34
2	25	31
2	26	27
2	74	34
2	98	33
2	15	33
2	40	27
2	59	31
2	98	35
2	34	36
2	40	36
2	53	29
2	83	34
2	30	37
2	37	36
2	46	36
2	69	35
2	83	37
2	98	35
2	29	38
2	51	36
2	95	38
2	29	39
2	46	36
2	51	36
2	69	35
2	9	39
2	12	37
2	46	36
2	51	36
2	60	39
2	61	38
2	82	40
2	83	40
2	9	39
2	12	37
2	27	41
2	30	37
2	44	41
2	60	39
2	69	37
2	2	42
2	60	39
2	69	37
2	77	39
2	95	42
2	60	39
2	90	43
2	91	42
2	12	37
2	27	41
2	55	43
2	2	45
2	3	41
2	26	45
2	38	45
2	39	42
2	55	43
2	60	39
2	60	39
2	69	37
2	79	45
2	91	42
2	95	42
2	38	45
2	44	41
2	2	45
2	55	47
2	61	47
2	76	45
2	90	43
2	99	47
2	2	45
2	7	47
2	14	48
2	16	44
2	21	48
2	34	47
2	67	46
2	76	45
2	77	45
2	7	47
2	14	49
2	16	48
2	31	49
2	65	47
2	67	46
2	75	49
2	1	49
2	16	48
2	35	46
2	67	46
2	1	51
2	21	48
2	81	51
2	79	45
2	2	45
2	61	48
2	66	52
2	65	47
2	65	47
2	65	47
2	67	46
2	75	49
2	79	45
2	91	51
2	7	47
2	14	49
2	61	48
2	80	53
2	97	50
2	11	55
2	15	55
2	38	55
2	40	55
2	51	55
2	55	55
2	81	51
2	38	56
2	2	57
2	19	55
2	27	57
2	38	55
2	45	54
2	57	53
2	62	57
2	2	57
2	38	55
2	55	55
2	72	55
2	80	57
2	92	59
2	93	59
2	22	60
2	55	55
2	97	57
2	2	57
2	11	60
2	30	57
2	38	60
2	46	61
2	62	57
2	62	56
2	71	61
2	80	61
2	15	60
2	69	62
2	75	61
2	75	61
2	75	61
2	92	59
2	92	59
2	9	63
2	15	60
2	30	63
2	38	60
2	50	59
2	57	63
2	80	61
2	80	57
2	88	60
2	92	59
2	1	61
2	15	60
2	44	63
2	50	59
2	88	60
2	93	64
2	11	60
2	44	63
2	50	59
2	50	59
2	62	65
2	69	65
2	71	61
2	56	63
2	57	63
2	74	66
2	15	60
2	29	65
2	37	63
2	37	63
2	44	63
2	50	59
2	98	67
2	3	68
2	15	60
2	62	65
2	74	66
2	81	66
2	8	69
2	49	69
2	51	65
2	62	65
2	81	66
2	88	65
2	14	70
2	14	69
2	15	60
2	25	66
2	40	70
2	74	66
2	3	68
2	24	71
2	39	71
2	62	65
2	76	71
2	81	66
2	91	71
2	93	71
2	3	68
2	29	65
2	57	70
2	62	65
2	90	72
2	100	72
2	29	65
2	49	69
2	57	70
2	60	70
2	8	69
2	55	74
2	66	74
2	84	72
2	44	75
2	91	71
2	2	72
2	55	74
2	74	74
2	81	66
2	81	66
2	15	76
2	22	74
2	24	71
2	32	77
2	39	71
2	62	78
2	63	78
2	71	77
2	71	77
2	14	79
2	15	76
2	22	75
2	71	77
2	83	76
2	92	79
2	91	71
2	1	76
2	44	80
2	47	80
2	71	77
2	71	77
2	92	78
2	8	78
2	20	81
2	1	82
2	14	82
2	22	79
2	28	82
2	32	77
2	47	80
2	4	81
2	8	79
2	44	80
2	68	84
2	71	77
2	14	82
2	26	85
2	33	82
2	3	81
2	14	82
2	54	79
2	73	85
2	85	86
2	96	85
2	26	85
2	44	87
2	62	86
2	85	87
2	1	82
2	45	86
2	68	84
2	16	89
2	33	82
2	96	85
2	5	89
2	34	89
2	40	90
2	53	86
2	62	86
2	87	84
2	87	84
2	97	90
2	5	89
2	5	89
2	5	89
2	39	91
2	62	86
2	85	87
2	97	90
2	50	92
2	52	88
2	74	90
2	73	85
2	34	89
2	85	87
2	5	89
2	17	94
2	24	92
2	31	90
2	6	95
2	5	89
2	13	94
2	24	95
2	24	92
2	31	90
2	96	95
2	96	92
2	3	96
2	13	96
2	13	94
2	40	96
2	69	96
2	74	90
2	94	96
2	1	97
2	40	96
2	48	95
2	94	96
2	1	98
2	3	96
2	6	95
2	6	95
2	41	96
2	81	98
2	84	98
2	94	96
2	13	96
2	50	93
2	63	94
2	84	96
2	4	96
2	26	100
2	29	100
2	30	100
2	53	100
2	84	96
3	4	1
3	29	1
3	53	1
3	55	1
3	65	1
3	71	1
3	10	2
3	13	2
3	26	2
3	53	1
3	77	2
3	4	1
3	26	2
3	52	2
3	86	2
3	4	1
3	45	1
3	65	4
3	65	1
3	10	2
3	53	1
3	62	5
3	65	1
3	65	1
3	71	5
3	92	3
3	6	6
3	43	3
3	53	1
3	71	1
3	24	3
3	38	7
3	50	3
3	50	3
3	56	7
3	62	5
3	62	5
3	4	8
3	36	8
3	84	8
3	49	6
3	90	9
3	6	6
3	49	6
3	65	4
3	65	4
3	84	8
3	90	10
3	100	10
3	6	6
3	63	10
3	16	12
3	34	9
3	55	12
3	75	11
3	25	11
3	33	11
3	42	13
3	44	13
3	54	13
3	84	8
3	16	14
3	84	8
3	29	11
3	45	11
3	54	14
3	63	14
3	100	15
3	24	16
3	40	15
3	63	14
3	69	16
3	69	15
3	82	15
3	87	16
3	92	16
3	52	17
3	74	17
3	16	14
3	16	14
3	40	18
3	74	17
3	57	19
3	74	17
3	34	20
3	39	20
3	49	19
3	59	18
3	68	19
3	97	19
3	4	19
3	18	21
3	30	21
3	50	17
3	59	18
3	74	17
3	64	22
3	81	22
3	87	16
3	6	17
3	40	20
3	39	20
3	54	24
3	63	24
3	64	24
3	1	25
3	81	22
3	99	25
3	73	26
3	79	26
3	87	24
3	26	27
3	38	27
3	40	27
3	73	25
3	5	25
3	5	25
3	5	25
3	19	28
3	35	28
3	39	20
3	87	24
3	92	28
3	1	26
3	1	26
3	18	29
3	53	29
3	62	29
3	9	24
3	19	28
3	26	30
3	53	28
3	61	30
3	79	28
3	91	29
3	4	31
3	16	31
3	24	31
3	33	29
3	46	31
3	53	31
3	59	31
3	61	30
3	4	31
3	16	31
3	53	32
3	75	32
3	79	28
3	16	31
3	26	27
3	53	29
3	58	33
3	98	33
3	1	34
3	4	31
3	16	31
3	91	32
3	97	35
3	37	36
3	51	36
3	53	34
3	69	32
3	83	36
3	3	34
3	12	37
3	13	37
3	34	37
3	46	36
3	69	37
3	69	35
3	74	34
3	4	31
3	46	36
3	53	34
3	61	38
3	83	34
3	40	36
3	46	36
3	60	39
3	59	31
3	69	35
3	77	39
3	37	36
3	46	36
3	61	38
3	100	40
3	21	38
3	30	37
3	45	41
3	61	38
3	83	39
3	95	41
3	21	38
3	29	38
3	29	38
3	30	37
3	39	42
3	70	42
3	77	39
3	94	42
3	95	42
3	29	39
3	83	39
3	91	42
3	16	44
3	39	42
3	8	44
3	21	45
3	21	42
3	44	41
3	55	45
3	87	45
3	88	43
3	2	42
3	67	46
3	70	42
3	91	42
3	7	47
3	34	47
3	65	47
3	87	45
3	90	43
3	39	42
3	39	42
3	61	48
3	67	46
3	87	45
3	16	48
3	21	45
3	26	45
3	55	47
3	76	45
3	87	45
3	1	49
3	21	45
3	55	47
3	65	47
3	65	47
3	67	46
3	79	45
3	92	50
3	21	45
3	34	47
3	55	47
3	85	49
3	91	52
3	92	48
3	1	49
3	7	47
3	14	49
3	65	47
3	85	49
3	20	54
3	44	54
3	18	55
3	40	55
3	57	53
3	72	55
3	98	55
3	8	55
3	15	55
3	20	53
3	45	54
3	62	56
3	64	56
3	25	57
3	27	57
3	72	55
3	80	57
3	99	55
3	57	54
3	1	59
3	2	57
3	50	59
3	94	59
3	11	60
3	15	60
3	16	60
3	21	60
3	25	57
3	62	56
3	72	55
3	92	59
3	1	61
3	15	60
3	50	59
3	50	59
3	75	61
3	79	61
3	92	59
3	9	60
3	50	59
3	11	60
3	55	63
3	75	61
3	75	61
3	9	64
3	44	64
3	46	61
3	57	63
3	29	65
3	30	63
3	51	65
3	62	62
3	69	65
3	71	61
3	75	61
3	87	65
3	1	61
3	25	66
3	29	65
3	56	63
3	79	66
3	81	66
3	90	65
3	1	61
3	25	66
3	30	63
3	50	59
3	62	65
3	69	65
3	99	67
3	25	66
3	29	65
3	40	68
3	50	59
3	67	66
3	79	66
3	14	69
3	19	69
3	25	66
3	81	66
3	2	70
3	3	68
3	14	69
3	74	66
3	81	66
3	94	70
3	26	71
3	51	65
3	91	71
3	93	71
3	98	67
3	74	66
3	84	72
3	2	72
3	2	72
3	29	65
3	2	75
3	22	74
3	66	74
3	1	76
3	44	75
3	74	76
3	74	74
3	82	76
3	84	76
3	2	75
3	22	74
3	27	77
3	32	77
3	39	71
3	39	71
3	71	77
3	99	77
3	22	74
3	22	74
3	39	71
3	54	79
3	71	77
3	92	78
3	15	76
3	46	80
3	52	80
3	60	80
3	82	80
3	92	78
3	98	80
3	3	81
3	14	79
3	27	77
3	47	80
3	82	80
3	4	81
3	33	82
3	42	81
3	98	80
3	22	79
3	98	80
3	44	80
3	82	80
3	82	80
3	87	84
3	84	76
3	9	85
3	33	82
3	60	80
3	67	85
3	73	85
3	26	85
3	33	82
3	46	86
3	55	86
3	62	86
3	96	85
3	22	86
3	22	86
3	54	79
3	62	86
3	73	85
3	96	85
3	33	82
3	44	88
3	52	88
3	85	86
3	85	86
3	5	89
3	17	87
3	26	85
3	22	86
3	31	90
3	62	86
3	74	90
3	84	90
3	85	86
3	100	90
3	30	91
3	39	91
3	73	85
3	81	90
3	85	87
3	87	84
3	5	89
3	5	89
3	24	92
3	5	89
3	16	89
3	50	93
3	55	86
3	76	90
3	76	90
3	73	85
3	85	87
3	14	94
3	31	90
3	49	94
3	63	94
3	62	86
3	4	95
3	63	94
3	70	95
3	85	87
3	96	95
3	3	96
3	17	94
3	17	94
3	29	93
3	41	96
3	63	94
3	96	92
3	4	95
3	13	94
3	36	97
3	59	97
3	84	97
3	89	97
3	12	98
3	13	94
3	24	92
3	36	97
3	69	96
3	71	94
3	1	97
3	4	95
3	12	99
3	31	99
3	59	97
3	63	94
3	83	98
3	96	95
3	4	96
3	13	96
3	50	93
3	77	98

## Sheet: Sheet4
1	18	1
1	56	1
1	98	1
1	10	1
1	17	2
1	39	1
1	72	2
1	76	2
1	79	1
1	2	2
1	18	1
1	18	1
1	39	1
1	46	1
1	46	1
1	53	3
1	91	2
1	2	2
1	30	1
1	65	1
1	72	2
1	91	2
1	18	1
1	23	5
1	56	1
1	76	2
1	79	1
1	88	3
1	17	2
1	46	1
1	61	5
1	65	1
1	17	7
1	19	7
1	25	2
1	40	6
1	39	1
1	55	3
1	65	1
1	65	1
1	79	1
1	13	7
1	30	1
1	48	8
1	55	3
1	79	1
1	88	3
1	69	9
1	79	1
1	27	10
1	10	9
1	41	11
1	48	8
1	57	11
1	95	11
1	36	10
1	53	12
1	59	8
1	16	13
1	47	13
1	48	10
1	57	11
1	89	8
1	5	9
1	19	12
1	41	11
1	85	10
1	85	10
1	3	14
1	53	12
1	74	12
1	79	15
1	80	15
1	84	15
1	84	14
1	100	15
1	29	16
1	32	16
1	1	14
1	27	17
1	48	10
1	62	14
1	67	17
1	32	16
1	45	18
1	74	12
1	95	18
1	96	18
1	32	16
1	69	17
1	84	15
1	95	18
1	10	20
1	48	18
1	55	20
1	82	20
1	86	20
1	10	20
1	25	19
1	39	21
1	55	20
1	55	20
1	95	18
1	91	22
1	25	19
1	34	23
1	55	20
1	65	23
1	82	23
1	16	20
1	77	24
1	82	20
1	9	22
1	48	23
1	77	25
1	1	24
1	82	23
1	87	26
1	96	26
1	1	24
1	45	23
1	45	23
1	61	25
1	96	27
1	1	24
1	16	20
1	67	28
1	72	27
1	96	26
1	1	24
1	19	29
1	37	28
1	87	26
1	45	23
1	91	26
1	32	30
1	67	28
1	15	31
1	27	28
1	47	32
1	58	32
1	66	32
1	1	30
1	1	30
1	22	29
1	27	30
1	92	31
1	66	32
1	92	34
1	91	26
1	1	30
1	27	30
1	27	28
1	53	34
1	63	35
1	1	30
1	1	30
1	36	36
1	58	32
1	81	36
1	91	36
1	92	31
1	2	37
1	15	37
1	63	35
1	30	38
1	49	38
1	74	38
1	81	36
1	91	38
1	8	37
1	36	36
1	63	35
1	63	35
1	69	39
1	1	40
1	36	36
1	36	36
1	57	40
1	62	40
1	81	36
1	91	36
1	30	38
1	36	41
1	37	41
1	57	41
1	89	41
1	96	40
1	36	41
1	45	38
1	56	42
1	62	42
1	10	43
1	57	40
1	80	43
1	81	40
1	10	43
1	27	44
1	3	45
1	6	45
1	34	43
1	68	45
1	75	44
1	16	44
1	28	43
1	45	38
1	56	42
1	61	46
1	94	46
1	3	45
1	16	44
1	41	41
1	52	45
1	61	47
1	6	45
1	16	44
1	60	48
1	85	48
1	99	48
1	1	49
1	16	49
1	44	49
1	41	41
1	73	49
1	75	44
1	8	50
1	25	50
1	28	43
1	16	49
1	60	51
1	61	47
1	94	47
1	29	49
1	50	52
1	51	52
1	60	48
1	78	50
1	80	50
1	92	52
1	2	49
1	29	49
1	44	53
1	50	53
1	50	52
1	2	49
1	8	50
1	30	54
1	31	54
1	44	54
1	58	52
1	60	51
1	71	51
1	92	52
1	4	54
1	37	51
1	71	51
1	78	50
1	44	53
1	66	56
1	71	51
1	80	50
1	11	55
1	37	51
1	43	57
1	57	55
1	66	56
1	83	57
1	11	55
1	37	51
1	58	52
1	83	57
1	90	54
1	96	58
1	11	59
1	37	51
1	43	59
1	77	55
1	96	58
1	18	57
1	18	57
1	37	60
1	40	60
1	76	60
1	96	58
1	4	57
1	18	57
1	49	61
1	66	61
1	76	60
1	18	57
1	27	59
1	29	59
1	35	60
1	48	62
1	49	62
1	66	61
1	76	62
1	87	62
1	90	54
1	16	63
1	18	57
1	40	60
1	4	62
1	18	57
1	45	64
1	63	63
1	76	60
1	4	62
1	35	60
1	72	65
1	87	62
1	13	66
1	29	59
1	57	63
1	85	62
1	20	62
1	20	62
1	45	64
1	56	67
1	57	63
1	84	67
1	85	62
1	21	68
1	22	68
1	20	62
1	43	68
1	56	67
1	57	63
1	71	68
1	93	67
1	16	65
1	38	68
1	49	69
1	53	69
1	93	67
1	93	67
1	1	66
1	12	70
1	16	65
1	21	68
1	49	69
1	93	67
1	1	66
1	30	68
1	43	68
1	56	67
1	69	71
1	16	65
1	21	68
1	36	68
1	12	70
1	28	73
1	30	68
1	88	73
1	23	73
1	23	73
1	48	70
1	55	74
1	61	72
1	79	70
1	88	73
1	10	73
1	51	75
1	69	71
1	74	73
1	74	73
1	86	73
1	4	76
1	10	73
1	28	73
1	28	73
1	30	68
1	46	73
1	10	73
1	28	73
1	73	77
1	93	77
1	19	78
1	55	74
1	61	72
1	73	77
1	4	76
1	57	79
1	68	77
1	70	77
1	83	79
1	86	73
1	95	77
1	25	80
1	32	78
1	57	81
1	93	81
1	30	79
1	32	78
1	92	82
1	21	83
1	25	83
1	40	82
1	68	77
1	3	82
1	9	84
1	25	80
1	30	79
1	52	84
1	68	83
1	75	84
1	99	84
1	3	82
1	9	84
1	25	83
1	40	82
1	92	82
1	1	86
1	3	82
1	57	86
1	75	84
1	80	83
1	87	85
1	21	83
1	90	85
1	98	84
1	9	84
1	40	82
1	7	89
1	37	89
1	77	89
1	90	85
1	27	90
1	40	82
1	14	89
1	39	88
1	56	91
1	89	91
1	28	90
1	32	90
1	57	91
1	77	89
1	1	93
1	14	89
1	39	88
1	69	89
1	27	90
1	43	94
1	39	88
1	48	88
1	56	91
1	10	95
1	39	88
1	69	89
1	76	95
1	81	95
1	93	91
1	93	91
1	10	95
1	21	96
1	22	96
1	43	96
1	48	88
1	67	96
1	69	89
1	94	96
1	9	97
1	10	95
1	10	95
1	22	96
1	66	97
1	81	97
1	9	97
1	10	95
1	31	98
1	39	98
1	86	98
1	4	98
1	4	98
1	48	97
1	52	95
1	57	99
1	9	97
1	9	97
1	21	96
1	22	95
1	48	97
1	48	97
1	67	96
1	100	100
2	10	1
2	30	1
2	39	1
2	46	1
2	65	1
2	79	1
2	80	1
2	2	2
2	18	2
2	18	1
2	30	1
2	91	2
2	2	2
2	46	1
2	46	1
2	46	1
2	88	3
2	25	2
2	72	4
2	72	2
2	39	1
2	46	1
2	61	5
2	88	3
2	30	1
2	40	6
2	46	1
2	55	3
2	60	6
2	79	1
2	14	7
2	46	1
2	88	3
2	40	6
2	79	1
2	88	3
2	98	8
2	6	9
2	10	9
2	57	9
2	5	9
2	6	9
2	24	10
2	36	10
2	61	5
2	61	5
2	61	5
2	69	9
2	79	10
2	85	10
2	98	8
2	10	9
2	17	7
2	17	7
2	36	11
2	40	6
2	69	9
2	89	8
2	89	8
2	36	10
2	57	11
2	59	8
2	74	12
2	85	10
2	89	8
2	46	13
2	48	10
2	53	12
2	57	11
2	3	14
2	5	9
2	41	11
2	74	12
2	84	14
2	100	14
2	53	12
2	59	8
2	32	16
2	40	16
2	36	10
2	74	12
2	89	8
2	100	16
2	5	9
2	59	16
2	69	17
2	74	12
2	89	8
2	89	8
2	19	12
2	19	12
2	48	18
2	57	18
2	59	16
2	67	17
2	84	15
2	96	18
2	3	14
2	25	19
2	74	12
2	84	15
2	16	20
2	24	20
2	25	19
2	27	17
2	29	16
2	69	17
2	69	17
2	69	17
2	1	14
2	22	21
2	36	21
2	55	20
2	69	17
2	82	20
2	96	18
2	9	22
2	21	22
2	45	18
2	66	22
2	86	20
2	35	23
2	36	21
2	39	21
2	45	23
2	48	23
2	15	24
2	24	20
2	22	21
2	66	22
2	16	20
2	40	26
2	91	26
2	91	22
2	1	24
2	40	27
2	45	27
2	48	23
2	77	24
2	91	26
2	27	28
2	37	28
2	67	28
2	87	26
2	91	26
2	22	29
2	48	23
2	77	25
2	1	30
2	22	29
2	27	30
2	72	27
2	72	27
2	77	28
2	96	26
2	15	31
2	19	29
2	61	25
2	67	28
2	67	28
2	87	31
2	92	31
2	3	30
2	9	32
2	1	30
2	47	32
2	58	32
2	76	33
2	77	28
2	77	28
2	27	28
2	53	34
2	64	34
2	66	32
2	87	31
2	15	31
2	58	32
2	63	35
2	66	32
2	3	30
2	15	31
2	25	36
2	27	28
2	52	36
2	63	35
2	76	33
2	98	36
2	8	37
2	15	37
2	24	37
2	98	36
2	2	37
2	81	36
2	98	38
2	53	34
2	63	39
2	74	38
2	36	36
2	62	40
2	81	40
2	89	40
2	98	36
2	8	37
2	30	38
2	56	41
2	74	38
2	74	38
2	81	40
2	88	42
2	36	41
2	53	43
2	81	43
2	91	39
2	16	44
2	22	41
2	28	43
2	41	41
2	53	43
2	89	41
2	62	42
2	80	43
2	80	43
2	28	43
2	91	39
2	3	45
2	27	44
2	68	45
2	94	47
2	34	43
2	91	47
2	99	48
2	2	49
2	16	44
2	28	49
2	29	49
2	30	49
2	52	45
2	61	46
2	66	49
2	84	49
2	85	48
2	94	46
2	10	50
2	16	44
2	60	50
2	60	48
2	78	50
2	1	49
2	8	50
2	14	50
2	23	51
2	24	51
2	30	49
2	37	51
2	60	51
2	71	51
2	91	47
2	94	47
2	28	49
2	44	49
2	50	52
2	73	49
2	80	50
2	84	49
2	8	50
2	10	50
2	16	49
2	22	53
2	23	53
2	58	52
2	80	50
2	94	47
2	69	54
2	78	50
2	78	50
2	90	54
2	94	47
2	11	55
2	12	55
2	30	54
2	30	54
2	44	53
2	44	53
2	57	55
2	58	52
2	60	51
2	60	51
2	71	51
2	77	55
2	90	55
2	4	56
2	58	52
2	1	57
2	4	57
2	90	54
2	44	54
2	51	58
2	66	58
2	77	55
2	1	57
2	18	57
2	27	59
2	29	59
2	51	58
2	83	57
2	11	60
2	11	59
2	35	60
2	38	60
2	51	58
2	83	57
2	4	57
2	11	55
2	49	60
2	66	61
2	83	57
2	29	59
2	30	59
2	49	61
2	49	61
2	51	58
2	66	61
2	85	62
2	91	62
2	4	62
2	16	63
2	18	57
2	49	61
2	57	63
2	84	63
2	85	62
2	4	57
2	4	57
2	30	64
2	46	64
2	66	61
2	87	62
2	18	57
2	35	60
2	49	61
2	91	62
2	1	66
2	16	63
2	20	62
2	35	60
2	45	64
2	63	63
2	13	66
2	55	67
2	63	63
2	72	65
2	6	68
2	4	62
2	12	68
2	36	68
2	63	63
2	1	66
2	36	68
2	52	69
2	56	67
2	57	63
2	11	70
2	20	62
2	30	68
2	43	68
2	48	70
2	53	69
2	57	63
2	63	63
2	79	70
2	80	70
2	81	70
2	93	67
2	38	68
2	93	67
2	100	71
2	1	66
2	21	68
2	29	72
2	30	72
2	38	68
2	58	72
2	61	72
2	66	71
2	10	73
2	11	73
2	23	73
2	30	68
2	39	73
2	58	72
2	20	74
2	28	73
2	86	73
2	8	76
2	20	74
2	58	72
2	66	71
2	74	73
2	88	73
2	88	73
2	23	73
2	23	73
2	55	74
2	63	77
2	68	77
2	74	73
2	79	70
2	88	73
2	1	77
2	4	76
2	10	73
2	23	73
2	32	78
2	40	78
2	42	78
2	49	78
2	55	74
2	74	73
2	19	78
2	32	78
2	62	79
2	82	79
2	95	77
2	19	78
2	40	78
2	46	73
2	68	77
2	73	77
2	73	77
2	81	80
2	16	81
2	42	78
2	3	82
2	16	81
2	95	77
2	3	83
2	3	82
2	13	83
2	32	78
2	68	83
2	69	83
2	80	83
2	92	82
2	30	84
2	31	84
2	32	78
2	32	78
2	68	83
2	3	82
2	21	85
2	30	79
2	52	84
2	80	83
2	90	85
2	40	82
2	40	82
2	80	83
2	1	86
2	13	83
2	20	87
2	21	83
2	21	83
2	80	83
2	3	82
2	21	85
2	80	83
2	1	86
2	14	89
2	19	89
2	21	85
2	57	86
2	69	89
2	76	89
2	80	83
2	90	85
2	18	89
2	20	87
2	27	90
2	28	90
2	40	82
2	67	90
2	5	91
2	32	90
2	48	88
2	55	91
2	57	91
2	64	91
2	67	91
2	67	90
2	69	89
2	80	88
2	93	91
2	90	85
2	96	87
2	32	90
2	56	91
2	76	89
2	80	88
2	43	93
2	56	91
2	89	91
2	90	85
2	52	94
2	48	88
2	56	91
2	5	91
2	39	88
2	52	95
2	64	91
2	67	91
2	69	89
2	75	95
2	81	95
2	22	95
2	43	94
2	57	91
2	93	91
2	22	96
2	43	94
2	48	97
2	48	88
2	4	98
2	21	96
2	22	96
2	39	98
2	48	88
2	48	88
2	81	98
2	93	91
2	20	99
2	21	96
2	37	99
2	38	99
2	39	98
2	52	95
2	94	99
2	21	96
2	21	96
2	22	96
2	57	99
2	67	96
2	81	100
2	81	97
3	6	1
3	41	1
3	48	1
3	92	1
3	17	2
3	25	2
3	56	1
3	79	2
3	79	1
3	79	1
3	2	2
3	6	1
3	30	1
3	46	1
3	54	3
3	55	3
3	2	4
3	18	1
3	76	2
3	91	2
3	98	1
3	25	2
3	30	1
3	46	1
3	56	1
3	2	2
3	31	6
3	30	1
3	91	2
3	13	7
3	15	7
3	88	3
3	13	8
3	23	5
3	59	8
3	55	3
3	89	8
3	5	9
3	25	2
3	55	3
3	74	9
3	79	9
3	87	9
3	98	8
3	13	7
3	40	6
3	48	10
3	48	8
3	74	9
3	84	10
3	3	11
3	36	10
3	57	9
3	89	8
3	6	9
3	19	12
3	35	12
3	41	11
3	10	9
3	16	13
3	19	12
3	1	14
3	36	10
3	57	11
3	62	14
3	74	14
3	16	13
3	41	11
3	52	15
3	81	15
3	85	10
3	100	15
3	3	14
3	5	9
3	16	13
3	36	10
3	47	13
3	59	16
3	62	16
3	59	8
3	3	14
3	3	14
3	3	14
3	16	17
3	32	16
3	48	10
3	72	17
3	79	15
3	89	8
3	99	17
3	16	17
3	27	17
3	40	16
3	46	18
3	79	15
3	84	15
3	27	17
3	57	19
3	67	17
3	74	12
3	84	15
3	1	14
3	22	20
3	29	16
3	40	20
3	45	18
3	16	20
3	55	20
3	16	20
3	25	19
3	39	21
3	48	18
3	55	20
3	70	22
3	69	17
3	9	22
3	16	20
3	32	23
3	39	21
3	70	22
3	1	24
3	25	19
3	40	20
3	65	23
3	70	22
3	70	22
3	91	22
3	45	23
3	48	23
3	61	25
3	16	20
3	21	22
3	34	23
3	48	23
3	72	27
3	1	24
3	37	28
3	48	23
3	71	28
3	72	27
3	72	27
3	77	28
3	60	29
3	3	30
3	19	29
3	32	30
3	61	25
3	96	26
3	1	31
3	13	31
3	27	28
3	32	30
3	32	30
3	61	25
3	67	28
3	1	30
3	71	28
3	72	27
3	15	31
3	54	33
3	100	33
3	3	30
3	3	30
3	13	31
3	87	31
3	87	31
3	3	30
3	13	31
3	27	30
3	27	28
3	66	32
3	15	31
3	9	37
3	36	36
3	25	36
3	45	38
3	49	38
3	63	35
3	81	36
3	23	39
3	36	36
3	91	39
3	98	39
3	25	36
3	45	38
3	49	38
3	74	38
3	91	36
3	96	40
3	22	41
3	24	37
3	41	41
3	45	38
3	57	40
3	69	39
3	74	38
3	23	39
3	49	38
3	81	42
3	81	40
3	17	43
3	18	43
3	22	43
3	23	39
3	28	43
3	34	43
3	6	44
3	27	44
3	71	44
3	75	44
3	52	45
3	81	40
3	27	44
3	56	42
3	34	43
3	52	45
3	53	43
3	81	40
3	91	47
3	94	46
3	3	45
3	3	45
3	22	41
3	28	43
3	94	46
3	99	48
3	1	49
3	30	49
3	45	49
3	60	49
3	60	48
3	61	46
3	85	48
3	99	49
3	1	49
3	14	50
3	28	49
3	29	49
3	80	50
3	91	47
3	99	50
3	16	49
3	16	44
3	73	49
3	99	48
3	52	52
3	58	52
3	59	52
3	60	48
3	8	50
3	23	51
3	28	49
3	29	49
3	37	51
3	58	52
3	58	52
3	66	49
3	97	53
3	4	54
3	8	50
3	22	53
3	33	54
3	37	51
3	52	52
3	70	54
3	77	54
3	2	49
3	4	54
3	11	56
3	22	53
3	37	51
3	92	52
3	2	57
3	18	57
3	69	54
3	4	54
3	30	54
3	30	54
3	77	58
3	11	55
3	18	57
3	30	59
3	37	51
3	57	55
3	66	56
3	83	57
3	90	55
3	49	60
3	77	58
3	96	58
3	27	59
3	29	59
3	37	60
3	43	57
3	83	57
3	96	61
3	4	62
3	20	62
3	43	59
3	72	62
3	76	60
3	63	63
3	66	61
3	87	62
3	87	62
3	4	62
3	48	62
3	49	61
3	66	61
3	76	60
3	4	62
3	13	65
3	16	65
3	16	63
3	49	61
3	49	61
3	72	62
3	1	66
3	16	63
3	63	63
3	96	66
3	12	67
3	57	63
3	93	67
3	94	67
3	30	68
3	38	68
3	71	68
3	56	67
3	93	67
3	36	68
3	36	68
3	66	71
3	84	67
3	91	71
3	1	66
3	30	68
3	66	72
3	24	73
3	46	73
3	74	73
3	79	70
3	86	73
3	39	73
3	74	73
3	93	67
3	4	76
3	46	73
3	66	71
3	88	73
3	1	77
3	4	76
3	70	77
3	74	77
3	95	77
3	41	78
3	50	78
3	48	70
3	61	72
3	68	78
3	74	73
3	95	77
3	19	78
3	25	79
3	26	79
3	30	79
3	51	75
3	19	78
3	46	73
3	63	77
3	13	81
3	32	78
3	49	78
3	68	77
3	16	81
3	32	78
3	40	82
3	92	82
3	13	81
3	40	82
3	68	77
3	81	83
3	93	81
3	93	81
3	25	80
3	32	78
3	50	84
3	93	81
3	98	84
3	2	85
3	39	85
3	62	85
3	80	83
3	87	85
3	3	82
3	9	84
3	9	84
3	68	83
3	25	83
3	40	82
3	50	84
3	62	85
3	87	85
3	96	87
3	97	87
3	98	87
3	98	84
3	1	86
3	21	85
3	21	85
3	39	88
3	48	88
3	80	88
3	87	85
3	18	89
3	40	82
3	79	89
3	80	89
3	80	88
3	87	85
3	98	84
3	32	90
3	69	89
3	53	91
3	69	89
3	69	89
3	80	88
3	5	92
3	5	91
3	27	90
3	39	88
3	90	85
3	37	89
3	56	91
3	14	94
3	14	89
3	27	90
3	27	90
3	64	91
3	67	90
3	89	94
3	89	91
3	22	95
3	32	95
3	39	88
3	69	89
3	76	95
3	93	91
3	14	94
3	43	94
3	69	89
3	81	95
3	14	94
3	40	97
3	81	95
3	7	98
3	52	94
3	63	98
3	75	95
3	89	94
3	21	99
3	39	98
3	48	97
3	52	95
3	67	96
3	91	99
3	31	98
3	31	98
3	36	100
3	52	95
3	86	100

## Sheet: Sheet5
1	53	1
1	11	2
1	17	1
1	33	1
1	47	3
1	59	3
1	82	3
1	33	1
1	49	2
1	7	5
1	17	1
1	47	3
1	7	6
1	13	2
1	77	6
1	17	1
1	23	2
1	41	2
1	47	3
1	59	3
1	82	3
1	1	4
1	37	8
1	49	2
1	58	6
1	64	8
1	70	9
1	98	5
1	14	10
1	37	10
1	37	8
1	43	10
1	14	10
1	23	2
1	90	11
1	92	9
1	14	10
1	44	10
1	57	12
1	70	9
1	92	9
1	12	13
1	70	9
1	74	9
1	92	9
1	92	9
1	12	14
1	14	10
1	44	10
1	67	14
1	75	14
1	23	11
1	57	12
1	5	16
1	13	12
1	22	13
1	42	16
1	66	14
1	67	14
1	75	14
1	1	17
1	12	13
1	13	12
1	23	11
1	60	17
1	92	9
1	5	16
1	9	14
1	70	14
1	65	16
1	65	16
1	80	19
1	82	19
1	22	13
1	42	20
1	59	20
1	66	14
1	73	20
1	80	19
1	17	21
1	42	20
1	82	19
1	9	14
1	23	22
1	7	23
1	23	22
1	56	23
1	65	16
1	91	23
1	42	20
1	51	22
1	56	23
1	56	23
1	90	24
1	91	24
1	7	23
1	14	23
1	39	25
1	51	22
1	79	24
1	88	24
1	56	23
1	67	24
1	75	25
1	79	24
1	87	26
1	88	24
1	14	23
1	86	27
1	44	28
1	67	24
1	79	24
1	87	26
1	97	28
1	1	29
1	11	28
1	22	29
1	44	28
1	59	22
1	66	29
1	75	29
1	79	24
1	87	26
1	58	30
1	87	26
1	1	31
1	37	31
1	44	31
1	59	22
1	95	31
1	4	28
1	11	28
1	44	28
1	86	28
1	52	33
1	53	33
1	82	33
1	86	28
1	1	31
1	4	28
1	29	31
1	37	31
1	56	30
1	58	30
1	93	31
1	28	35
1	29	31
1	43	33
1	44	31
1	44	31
1	52	33
1	52	33
1	56	30
1	64	35
1	82	33
1	82	33
1	86	28
1	25	36
1	42	36
1	64	35
1	70	36
1	73	31
1	93	31
1	93	31
1	1	37
1	64	35
1	93	31
1	93	31
1	6	35
1	6	35
1	20	38
1	25	38
1	28	35
1	36	37
1	49	36
1	55	38
1	91	38
1	6	35
1	6	35
1	25	36
1	42	36
1	90	39
1	49	36
1	64	37
1	70	36
1	90	39
1	6	35
1	16	38
1	36	37
1	47	41
1	55	38
1	81	38
1	96	42
1	8	42
1	36	37
1	63	43
1	64	43
1	73	43
1	90	43
1	28	44
1	31	41
1	36	37
1	47	41
1	96	42
1	5	45
1	37	43
1	55	44
1	63	43
1	73	43
1	90	43
1	96	42
1	3	46
1	16	46
1	28	44
1	47	41
1	55	44
1	59	43
1	81	38
1	8	42
1	55	44
1	69	46
1	100	47
1	37	43
1	37	43
1	52	48
1	54	48
1	54	47
1	55	44
1	59	43
1	95	48
1	2	49
1	3	46
1	81	47
1	3	46
1	12	50
1	23	47
1	26	45
1	36	50
1	46	49
1	52	48
1	55	44
1	69	49
1	81	47
1	35	51
1	44	50
1	52	48
1	77	52
1	11	50
1	12	50
1	19	53
1	67	53
1	68	53
1	77	52
1	94	53
1	95	49
1	93	54
1	7	55
1	56	55
1	61	52
1	74	55
1	76	55
1	85	55
1	92	55
1	1	56
1	7	55
1	43	56
1	55	56
1	61	52
1	74	55
1	7	55
1	26	57
1	49	57
1	67	53
1	74	55
1	85	55
1	16	58
1	18	57
1	18	57
1	30	57
1	32	55
1	61	58
1	72	58
1	82	58
1	92	55
1	1	56
1	16	58
1	25	57
1	56	55
1	56	55
1	72	59
1	74	55
1	92	55
1	16	58
1	49	57
1	82	58
1	99	60
1	1	58
1	18	57
1	32	55
1	40	58
1	61	58
1	72	61
1	87	55
1	8	60
1	53	62
1	22	63
1	40	58
1	78	60
1	88	61
1	87	55
1	1	60
1	88	61
1	1	58
1	48	65
1	78	60
1	1	60
1	70	63
1	78	64
1	88	61
1	1	60
1	15	65
1	53	67
1	70	63
1	70	63
1	15	65
1	24	68
1	42	68
1	44	66
1	53	68
1	3	69
1	15	65
1	23	69
1	48	65
1	64	69
1	78	64
1	95	67
1	14	68
1	15	65
1	64	69
1	64	69
1	78	64
1	84	69
1	95	67
1	3	69
1	15	65
1	23	69
1	35	71
1	42	68
1	70	68
1	79	71
1	3	72
1	15	65
1	53	68
1	21	73
1	35	71
1	14	68
1	47	74
1	57	73
1	21	73
1	47	74
1	57	73
1	70	68
1	93	71
1	41	76
1	47	76
1	47	74
1	72	73
1	84	76
1	21	73
1	41	76
1	47	74
1	57	73
1	91	75
1	2	76
1	12	74
1	29	74
1	91	75
1	2	76
1	7	78
1	12	74
1	19	76
1	26	79
1	46	79
1	53	76
1	84	76
1	2	76
1	29	74
1	37	77
1	67	75
1	79	78
1	37	77
1	37	77
1	53	76
1	63	81
1	64	76
1	79	78
1	91	75
1	53	82
1	53	76
1	63	82
1	79	78
1	47	79
1	62	83
1	64	76
1	93	82
1	97	80
1	35	80
1	37	77
1	46	80
1	47	79
1	64	76
1	8	84
1	15	85
1	3	86
1	30	79
1	64	76
1	73	86
1	80	86
1	26	84
1	47	87
1	60	83
1	73	86
1	73	86
1	3	88
1	8	85
1	84	86
1	53	89
1	80	86
1	98	89
1	47	90
1	84	86
1	19	91
1	98	89
1	27	92
1	56	89
1	83	92
1	83	91
1	35	92
1	94	93
1	95	93
1	27	92
1	47	90
1	52	94
1	56	89
1	83	92
1	93	94
1	2	91
1	24	95
1	36	90
1	52	94
1	53	93
1	69	95
1	2	91
1	53	93
1	76	95
1	1	97
1	35	92
1	53	93
1	58	95
1	63	97
1	69	95
1	87	97
1	1	97
1	8	92
1	52	98
1	76	95
1	84	98
1	89	97
1	20	97
1	30	99
1	32	96
1	53	93
1	58	95
1	76	95
1	89	97
1	20	97
1	58	95
2	72	1
2	100	1
2	13	2
2	29	1
2	49	2
2	61	2
2	63	1
2	86	2
2	11	2
2	23	2
2	29	1
2	29	1
2	39	3
2	47	3
2	72	1
2	93	3
2	98	3
2	1	4
2	17	1
2	23	2
2	33	1
2	1	4
2	11	5
2	11	2
2	49	2
2	82	3
2	86	2
2	98	5
2	41	2
2	93	3
2	93	3
2	26	7
2	29	1
2	52	7
2	82	3
2	11	5
2	64	8
2	98	8
2	26	7
2	23	2
2	74	9
2	7	6
2	26	7
2	92	9
2	26	7
2	42	10
2	52	7
2	70	9
2	13	12
2	23	11
2	37	8
2	44	10
2	55	12
2	64	8
2	74	9
2	79	12
2	22	13
2	23	11
2	33	12
2	44	10
2	53	13
2	64	8
2	79	13
2	9	14
2	23	11
2	37	10
2	44	10
2	53	14
2	55	12
2	66	14
2	70	14
2	74	14
2	74	9
2	20	15
2	22	13
2	23	11
2	55	12
2	57	12
2	92	9
2	2	16
2	4	16
2	12	13
2	23	11
2	23	11
2	33	12
2	43	16
2	43	15
2	89	16
2	90	12
2	9	14
2	12	13
2	22	13
2	32	17
2	50	17
2	75	14
2	85	17
2	9	14
2	12	14
2	43	15
2	13	12
2	42	16
2	89	16
2	89	16
2	90	12
2	1	17
2	17	20
2	34	17
2	50	17
2	66	14
2	80	20
2	98	20
2	100	20
2	17	20
2	32	17
2	34	17
2	34	17
2	70	14
2	34	22
2	51	22
2	56	22
2	14	23
2	51	22
2	56	22
2	96	20
2	67	24
2	73	20
2	79	24
2	7	23
2	59	22
2	67	24
2	79	25
2	23	26
2	50	26
2	75	25
2	75	25
2	14	23
2	39	25
2	59	22
2	2	28
2	4	28
2	5	28
2	5	24
2	5	24
2	11	28
2	14	23
2	45	26
2	98	28
2	98	27
2	44	28
2	67	24
2	88	24
2	88	24
2	97	29
2	97	28
2	1	29
2	44	30
2	50	26
2	75	29
2	11	28
2	22	29
2	36	31
2	45	26
2	75	31
2	97	28
2	1	29
2	5	24
2	29	31
2	36	32
2	65	32
2	37	31
2	82	31
2	82	31
2	95	31
2	29	34
2	44	31
2	71	34
2	73	31
2	11	28
2	29	35
2	29	31
2	52	33
2	70	35
2	82	33
2	86	28
2	41	36
2	43	33
2	73	31
2	80	33
2	82	33
2	1	37
2	11	37
2	29	31
2	43	33
2	49	36
2	52	33
2	64	37
2	80	33
2	92	37
2	93	37
2	16	38
2	19	38
2	36	37
2	36	37
2	49	36
2	58	38
2	56	30
2	70	36
2	1	37
2	58	38
2	20	38
2	42	36
2	76	40
2	91	38
2	30	41
2	31	41
2	47	41
2	91	38
2	25	38
2	46	42
2	47	41
2	58	38
2	64	37
2	76	40
2	81	38
2	16	38
2	36	43
2	37	43
2	36	37
2	59	43
2	61	43
2	81	38
2	96	42
2	28	44
2	47	41
2	55	44
2	64	37
2	64	37
2	73	43
2	96	42
2	55	44
2	3	46
2	4	46
2	16	44
2	28	44
2	81	38
2	37	43
2	73	43
2	16	46
2	26	45
2	78	48
2	81	47
2	95	47
2	26	45
2	36	49
2	69	49
2	69	46
2	69	46
2	95	49
2	11	50
2	16	46
2	16	46
2	23	50
2	41	50
2	46	49
2	51	50
2	62	50
2	68	49
2	81	38
2	95	48
2	2	51
2	11	50
2	26	45
2	8	52
2	12	50
2	23	52
2	23	50
2	41	50
2	52	48
2	69	49
2	2	53
2	2	49
2	26	45
2	35	53
2	35	51
2	46	49
2	81	47
2	2	51
2	12	50
2	12	50
2	44	50
2	46	49
2	95	49
2	23	52
2	32	55
2	35	51
2	55	55
2	7	55
2	61	52
2	83	56
2	18	57
2	25	57
2	61	54
2	68	53
2	87	55
2	1	58
2	1	56
2	1	56
2	32	55
2	40	58
2	72	58
2	85	55
2	92	55
2	8	60
2	61	60
2	78	60
2	87	55
2	8	60
2	18	57
2	32	55
2	1	58
2	58	62
2	82	58
2	88	61
2	19	63
2	37	63
2	39	63
2	40	58
2	70	63
2	78	60
2	1	60
2	1	58
2	19	63
2	22	63
2	36	64
2	39	63
2	39	63
2	40	58
2	72	61
2	78	64
2	86	64
2	37	63
2	99	65
2	70	63
2	86	64
2	1	60
2	1	60
2	1	60
2	35	67
2	48	65
2	53	67
2	88	61
2	95	67
2	44	68
2	67	68
2	78	64
2	95	67
2	29	69
2	35	67
2	35	67
2	48	65
2	48	65
2	48	65
2	55	67
2	55	67
2	70	68
2	84	69
2	3	69
2	15	65
2	64	69
2	79	70
2	94	70
2	13	71
2	14	68
2	15	65
2	29	69
2	41	71
2	79	70
2	93	71
2	44	66
2	67	68
2	70	68
2	70	68
2	70	68
2	70	68
2	84	69
2	3	69
2	13	73
2	64	69
2	9	74
2	12	74
2	29	74
2	41	74
2	29	74
2	84	75
2	93	75
2	93	71
2	3	72
2	19	76
2	29	74
2	53	76
2	13	73
2	18	77
2	29	74
2	47	74
2	53	77
2	67	75
2	91	77
2	7	78
2	19	76
2	41	76
2	72	73
2	84	76
2	84	76
2	91	75
2	1	79
2	12	74
2	53	76
2	79	78
2	91	75
2	12	74
2	35	80
2	41	76
2	53	76
2	64	76
2	64	76
2	72	73
2	97	80
2	2	76
2	7	78
2	19	76
2	37	77
2	67	75
2	67	75
2	79	78
2	64	76
2	79	78
2	97	82
2	19	76
2	30	79
2	46	79
2	60	83
2	60	83
2	8	85
2	16	85
2	30	79
2	60	85
2	79	78
2	87	85
2	93	82
2	7	86
2	8	84
2	31	86
2	35	80
2	35	80
2	64	76
2	84	86
2	3	86
2	15	85
2	26	84
2	31	87
2	47	79
2	60	83
2	26	84
2	2	89
2	73	86
2	44	90
2	95	90
2	44	90
2	62	91
2	83	91
2	8	85
2	8	85
2	26	84
2	35	92
2	53	89
2	15	93
2	27	92
2	36	90
2	44	90
2	53	93
2	78	90
2	8	92
2	15	93
2	26	94
2	62	91
2	1	95
2	2	95
2	15	93
2	19	91
2	19	91
2	27	92
2	76	95
2	92	94
2	69	95
2	75	96
2	94	93
2	1	95
2	20	97
2	63	97
2	69	95
2	89	97
2	32	96
2	63	97
2	85	98
2	86	98
2	87	98
2	87	97
2	93	94
2	98	98
2	32	96
2	76	95
2	84	98
2	6	100
2	32	96
2	57	100
2	89	97
3	17	1
3	29	1
3	32	1
3	33	1
3	42	1
3	63	1
3	67	1
3	16	2
3	23	2
3	29	1
3	32	1
3	41	2
3	42	1
3	51	2
3	53	2
3	59	2
3	93	2
3	17	1
3	17	1
3	23	2
3	42	1
3	61	2
3	92	3
3	23	2
3	29	1
3	39	3
3	53	1
3	61	2
3	63	1
3	72	4
3	92	3
3	11	2
3	23	2
3	93	3
3	1	4
3	11	2
3	58	6
3	82	3
3	7	5
3	25	7
3	33	1
3	39	3
3	58	6
3	93	3
3	17	1
3	23	2
3	23	2
3	77	6
3	41	2
3	57	9
3	85	9
3	92	9
3	1	4
3	14	10
3	26	7
3	37	8
3	37	8
3	37	8
3	42	10
3	43	10
3	44	10
3	58	6
3	58	6
3	85	9
3	23	11
3	37	8
3	57	9
3	64	8
3	70	9
3	29	12
3	31	12
3	33	12
3	37	8
3	58	6
3	81	12
3	90	12
3	44	10
3	55	13
3	55	12
3	64	8
3	64	8
3	7	14
3	9	14
3	22	13
3	33	12
3	55	12
3	90	11
3	5	15
3	9	14
3	23	11
3	43	15
3	67	14
3	92	9
3	92	9
3	33	12
3	65	16
3	75	14
3	12	13
3	12	13
3	13	12
3	32	17
3	34	17
3	42	16
3	84	17
3	1	17
3	9	14
3	60	17
3	75	14
3	5	16
3	23	11
3	42	16
3	43	16
3	85	17
3	5	16
3	32	17
3	41	20
3	80	19
3	96	20
3	15	21
3	17	20
3	25	21
3	34	17
3	65	16
3	65	16
3	70	14
3	23	22
3	59	22
3	65	16
3	96	20
3	96	20
3	23	22
3	73	20
3	73	20
3	80	19
3	96	20
3	5	24
3	7	23
3	17	21
3	34	17
3	41	20
3	88	24
3	17	21
3	51	22
3	59	22
3	67	24
3	75	25
3	79	24
3	23	22
3	28	26
3	32	26
3	45	26
3	51	22
3	59	22
3	75	26
3	88	24
3	91	23
3	5	24
3	28	26
3	67	24
3	79	24
3	98	27
3	1	28
3	4	28
3	5	28
3	13	28
3	14	28
3	17	28
3	28	26
3	45	28
3	86	28
3	97	28
3	59	22
3	11	28
3	11	28
3	28	26
3	56	30
3	75	29
3	85	30
3	86	27
3	88	24
3	1	29
3	1	29
3	5	24
3	29	31
3	44	28
3	45	26
3	59	22
3	73	31
3	75	29
3	82	31
3	86	27
3	93	31
3	5	24
3	11	28
3	56	30
3	97	28
3	12	33
3	19	33
3	22	29
3	37	31
3	43	33
3	44	31
3	65	33
3	75	29
3	80	33
3	95	31
3	29	34
3	58	30
3	6	35
3	70	35
3	100	35
3	11	28
3	19	33
3	27	36
3	29	31
3	36	32
3	41	36
3	49	36
3	64	35
3	71	34
3	73	31
3	80	33
3	86	28
3	36	37
3	40	37
3	56	30
3	64	35
3	80	33
3	1	37
3	11	38
3	36	37
3	49	38
3	64	35
3	69	38
3	71	34
3	81	38
3	80	33
3	1	37
3	6	35
3	49	36
3	64	35
3	70	36
3	80	33
3	16	38
3	41	36
3	49	36
3	49	36
3	75	40
3	81	40
3	6	35
3	76	40
3	8	42
3	47	41
3	64	37
3	76	40
3	91	38
3	31	41
3	37	43
3	57	43
3	64	37
3	72	43
3	76	40
3	81	40
3	81	38
3	16	44
3	16	38
3	43	44
3	56	44
3	57	44
3	59	43
3	63	43
3	73	43
3	81	40
3	26	45
3	2	46
3	8	42
3	47	41
3	69	46
3	81	38
3	81	38
3	81	38
3	23	47
3	28	44
3	37	43
3	54	47
3	81	47
3	88	47
3	95	47
3	13	48
3	16	46
3	23	47
3	31	41
3	69	48
3	81	47
3	81	38
3	26	45
3	46	49
3	59	43
3	68	49
3	77	49
3	95	48
3	36	49
3	44	50
3	46	49
3	69	46
3	81	47
3	23	47
3	23	47
3	46	49
3	68	51
3	41	50
3	41	50
3	46	49
3	52	48
3	61	52
3	78	48
3	81	47
3	62	50
3	81	47
3	2	54
3	2	51
3	35	54
3	41	50
3	44	50
3	61	54
3	95	49
3	2	51
3	23	52
3	35	51
3	55	55
3	61	52
3	87	55
3	11	50
3	19	53
3	35	53
3	61	52
3	85	55
3	94	53
3	30	57
3	48	57
3	56	55
3	61	52
3	94	53
3	7	55
3	17	58
3	32	55
3	49	57
3	55	56
3	87	55
3	93	54
3	18	57
3	30	57
3	30	57
3	56	55
3	1	60
3	9	60
3	26	57
3	30	57
3	48	60
3	61	60
3	81	60
3	95	60
3	82	58
3	88	61
3	16	58
3	26	62
3	72	58
3	78	60
3	95	60
3	95	60
3	1	60
3	1	60
3	25	57
3	26	62
3	36	64
3	48	60
3	53	62
3	88	61
3	4	65
3	15	65
3	19	63
3	37	63
3	8	60
3	15	65
3	44	66
3	48	65
3	58	62
3	78	60
3	88	61
3	99	65
3	37	63
3	55	67
3	99	67
3	3	68
3	14	68
3	70	68
3	88	61
3	95	67
3	48	65
3	78	64
3	15	65
3	15	65
3	44	66
3	55	67
3	84	69
3	95	67
3	64	69
3	70	68
3	84	69
3	95	67
3	24	68
3	35	71
3	53	68
3	64	69
3	3	69
3	29	73
3	57	73
3	72	73
3	70	68
3	13	71
3	14	68
3	29	73
3	35	71
3	29	74
3	47	74
3	67	75
3	91	75
3	2	76
3	3	72
3	21	73
3	56	76
3	64	76
3	84	76
3	91	76
3	2	76
3	37	77
3	47	74
3	67	75
3	84	76
3	9	74
3	9	74
3	29	74
3	37	77
3	53	76
3	53	76
3	72	73
3	79	78
3	30	79
3	47	79
3	47	76
3	67	75
3	93	71
3	35	80
3	46	80
3	53	76
3	53	76
3	26	79
3	37	77
3	66	81
3	67	75
3	79	81
3	79	78
3	91	75
3	1	79
3	12	74
3	35	80
3	53	76
3	79	78
3	79	78
3	79	78
3	93	82
3	1	79
3	26	79
3	53	76
3	64	76
3	79	78
3	8	84
3	26	84
3	33	84
3	35	80
3	37	77
3	53	82
3	64	76
3	14	85
3	30	79
3	64	76
3	75	85
3	87	85
3	92	85
3	26	86
3	59	86
3	75	85
3	81	86
3	87	85
3	3	86
3	15	85
3	35	80
3	46	80
3	47	79
3	62	83
3	35	80
3	80	86
3	92	85
3	8	84
3	15	85
3	31	86
3	56	89
3	80	86
3	36	90
3	30	79
3	30	79
3	47	87
3	53	89
3	78	90
3	80	86
3	84	86
3	2	91
3	36	90
3	47	87
3	2	92
3	8	92
3	16	92
3	27	92
3	26	84
3	84	86
3	19	91
3	26	93
3	35	92
3	47	90
3	53	89
3	56	89
3	83	92
3	93	93
3	98	89
3	19	91
3	53	93
3	70	94
3	92	94
3	94	93
3	58	95
3	56	89
3	92	94
3	100	95
3	32	96
3	35	92
3	52	94
3	83	92
3	2	91
3	8	92
3	14	97
3	15	93
3	24	95
3	36	90
3	2	91
3	32	96
3	76	95
3	89	97
3	1	97
3	36	90
3	52	98
3	53	93
3	69	95
3	75	99
3	76	95
3	30	99
3	30	99
3	30	99
3	52	100
3	59	100
3	75	96
3	76	95
3	89	97

## Sheet: Sheet6
1	47	1
1	61	1
1	63	1
1	69	1
1	4	2
1	11	2
1	25	2
1	78	1
1	94	2
1	94	1
1	4	2
1	11	2
1	20	3
1	46	3
1	58	2
1	94	2
1	94	2
1	94	2
1	94	1
1	94	1
1	78	1
1	11	2
1	42	5
1	43	4
1	78	1
1	1	6
1	31	6
1	42	5
1	58	2
1	94	1
1	8	7
1	10	4
1	42	5
1	52	5
1	70	1
1	78	1
1	34	6
1	66	8
1	70	1
1	10	4
1	22	9
1	24	8
1	24	8
1	31	6
1	31	6
1	62	9
1	22	9
1	22	9
1	66	8
1	71	10
1	80	10
1	86	7
1	1	11
1	2	11
1	8	7
1	24	8
1	31	9
1	37	11
1	50	11
1	52	5
1	59	11
1	1	11
1	8	8
1	8	8
1	8	8
1	50	12
1	50	11
1	62	9
1	5	11
1	18	10
1	22	9
1	31	9
1	55	13
1	58	13
1	1	11
1	18	10
1	35	14
1	45	12
1	59	11
1	86	7
1	27	15
1	31	9
1	8	8
1	8	8
1	16	15
1	27	15
1	1	17
1	18	10
1	66	14
1	66	14
1	70	13
1	71	13
1	79	17
1	8	18
1	18	10
1	6	19
1	16	15
1	40	19
1	15	20
1	16	15
1	32	16
1	54	20
1	66	14
1	1	17
1	15	20
1	71	13
1	14	22
1	15	20
1	21	22
1	69	22
1	83	22
1	14	23
1	21	22
1	26	23
1	37	19
1	37	19
1	40	19
1	94	19
1	94	19
1	31	24
1	77	24
1	89	24
1	94	19
1	5	23
1	59	25
1	83	22
1	89	24
1	5	23
1	26	23
1	26	23
1	31	24
1	53	22
1	89	24
1	1	26
1	22	27
1	82	27
1	94	19
1	5	23
1	31	22
1	98	28
1	99	28
1	71	27
1	77	27
1	90	29
1	18	28
1	18	28
1	30	30
1	31	22
1	55	30
1	71	27
1	71	27
1	12	31
1	18	28
1	24	27
1	43	31
1	49	31
1	68	31
1	69	28
1	71	27
1	82	27
1	82	27
1	11	32
1	31	22
1	61	31
1	88	32
1	90	29
1	90	29
1	1	33
1	12	31
1	18	28
1	35	29
1	49	31
1	55	30
1	61	31
1	68	31
1	88	32
1	35	29
1	42	34
1	43	31
1	61	31
1	87	34
1	88	32
1	88	32
1	49	31
1	9	36
1	10	36
1	42	34
1	71	36
1	76	36
1	88	32
1	1	33
1	87	37
1	8	38
1	9	36
1	16	38
1	87	34
1	28	39
1	33	39
1	76	36
1	2	38
1	28	39
1	48	40
1	16	38
1	58	41
1	87	37
1	92	40
1	93	37
1	2	38
1	8	38
1	22	42
1	40	41
1	54	42
1	75	42
1	81	36
1	93	37
1	13	41
1	20	43
1	40	41
1	58	41
1	65	42
1	75	42
1	92	40
1	65	42
1	65	42
1	22	42
1	81	41
1	92	40
1	3	43
1	11	46
1	16	46
1	17	46
1	38	46
1	75	42
1	3	43
1	13	41
1	13	41
1	30	45
1	40	41
1	75	43
1	16	46
1	26	48
1	49	47
1	55	47
1	64	48
1	16	46
1	30	45
1	38	46
1	40	46
1	41	46
1	46	48
1	30	45
1	55	47
1	63	50
1	69	50
1	75	43
1	75	43
1	97	50
1	6	51
1	22	51
1	78	51
1	86	51
1	87	50
1	97	50
1	40	46
1	75	52
1	87	50
1	11	53
1	26	51
1	74	53
1	3	52
1	50	54
1	56	54
1	74	54
1	27	56
1	26	51
1	61	56
1	75	52
1	91	56
1	1	53
1	3	52
1	26	51
1	46	57
1	2	58
1	38	58
1	73	57
1	34	58
1	46	57
1	91	56
1	96	59
1	14	58
1	18	56
1	67	57
1	96	60
1	11	58
1	14	58
1	34	58
1	46	57
1	52	61
1	73	57
1	79	60
1	50	62
1	67	57
1	79	60
1	1	63
1	18	56
1	34	58
1	50	62
1	67	60
1	67	57
1	79	60
1	1	64
1	1	63
1	13	63
1	33	64
1	44	60
1	90	64
1	92	64
1	14	58
1	33	64
1	44	65
1	44	60
1	63	65
1	67	60
1	12	66
1	44	65
1	67	60
1	2	63
1	25	66
1	58	67
1	61	66
1	63	65
1	92	64
1	96	64
1	85	68
1	12	66
1	21	69
1	25	66
1	25	66
1	74	69
1	81	69
1	90	67
1	96	64
1	4	70
1	6	70
1	19	69
1	31	68
1	54	70
1	85	68
1	12	68
1	17	70
1	90	67
1	12	68
1	50	72
1	64	72
1	36	70
1	54	70
1	69	73
1	74	69
1	90	73
1	1	74
1	12	74
1	31	68
1	36	70
1	54	70
1	54	70
1	69	74
1	33	75
1	56	75
1	72	71
1	23	76
1	30	76
1	50	72
1	69	73
1	90	73
1	1	74
1	90	73
1	93	73
1	93	73
1	7	79
1	23	76
1	54	78
1	56	75
1	86	76
1	86	76
1	95	79
1	23	80
1	37	80
1	44	73
1	86	76
1	86	76
1	86	76
1	6	79
1	7	79
1	20	81
1	44	73
1	44	73
1	37	80
1	72	82
1	86	76
1	1	82
1	17	82
1	29	78
1	72	82
1	82	79
1	86	76
1	86	76
1	12	84
1	29	82
1	29	78
1	37	80
1	42	84
1	68	84
1	14	84
1	79	85
1	38	86
1	42	84
1	42	84
1	63	83
1	68	84
1	79	85
1	91	86
1	1	82
1	29	78
1	38	87
1	48	87
1	9	88
1	78	88
1	90	88
1	91	86
1	15	89
1	16	89
1	38	86
1	68	85
1	73	89
1	97	89
1	43	89
1	50	87
1	87	89
1	91	86
1	9	88
1	22	91
1	63	91
1	78	88
1	90	88
1	3	90
1	9	88
1	28	92
1	51	92
1	50	87
1	63	91
1	72	92
1	13	93
1	15	89
1	43	89
1	49	92
1	51	92
1	69	93
1	70	92
1	68	85
1	32	91
1	51	92
1	50	87
1	61	94
1	21	95
1	22	91
1	51	92
1	85	91
1	96	93
1	1	96
1	9	96
1	12	95
1	41	96
1	7	97
1	21	95
1	29	98
1	46	98
1	78	98
1	7	97
1	26	99
1	25	100
1	29	98
1	46	98
1	51	99
1	62	100
1	70	100
1	98	100
2	20	1
2	31	1
2	36	1
2	94	1
2	12	2
2	47	1
2	58	2
2	70	1
2	78	1
2	88	2
2	20	3
2	25	3
2	47	1
2	61	1
2	69	1
2	25	2
2	43	4
2	70	1
2	78	1
2	93	4
2	4	2
2	4	2
2	20	3
2	70	1
2	93	5
2	1	2
2	94	1
2	86	7
2	93	4
2	93	4
2	8	8
2	52	5
2	78	1
2	91	8
2	93	4
2	24	8
2	29	9
2	30	9
2	31	9
2	52	5
2	1	2
2	18	10
2	60	10
2	71	9
2	70	1
2	100	10
2	10	4
2	22	9
2	31	9
2	34	6
2	66	8
2	70	1
2	86	7
2	8	8
2	18	10
2	30	9
2	45	12
2	50	11
2	66	8
2	79	12
2	88	12
2	1	11
2	24	8
2	45	13
2	50	13
2	71	13
2	97	13
2	1	11
2	42	14
2	44	14
2	66	14
2	86	7
2	1	15
2	8	8
2	8	8
2	16	15
2	45	12
2	64	15
2	88	12
2	97	13
2	18	10
2	32	16
2	85	12
2	94	16
2	1	15
2	1	15
2	18	10
2	79	17
2	85	12
2	94	16
2	1	17
2	9	18
2	26	18
2	79	17
2	16	19
2	40	16
2	64	15
2	66	14
2	85	12
2	94	19
2	94	16
2	37	19
2	58	20
2	71	13
2	92	20
2	93	20
2	6	19
2	8	18
2	26	18
2	37	19
2	84	21
2	14	22
2	53	22
2	72	22
2	78	22
2	80	22
2	4	23
2	6	19
2	21	22
2	26	23
2	37	19
2	40	19
2	31	22
2	37	19
2	45	24
2	47	24
2	49	24
2	54	20
2	58	20
2	61	20
2	69	22
2	72	22
2	83	22
2	92	24
2	26	23
2	4	23
2	4	23
2	14	22
2	53	22
2	77	24
2	1	27
2	1	26
2	4	23
2	24	27
2	25	27
2	47	24
2	53	22
2	94	19
2	1	27
2	18	28
2	31	24
2	59	25
2	18	28
2	31	22
2	53	22
2	95	29
2	22	27
2	30	30
2	52	30
2	67	31
2	98	28
2	18	28
2	30	30
2	55	30
2	61	31
2	67	31
2	87	32
2	1	30
2	1	30
2	27	33
2	30	30
2	30	30
2	30	30
2	88	32
2	90	29
2	27	34
2	45	31
2	55	30
2	95	33
2	1	30
2	11	32
2	18	32
2	35	29
2	45	31
2	51	31
2	95	35
2	1	33
2	36	36
2	71	36
2	95	35
2	27	33
2	34	37
2	93	37
2	2	38
2	15	38
2	17	38
2	18	32
2	42	34
2	68	38
2	76	38
2	81	36
2	93	37
2	36	36
2	51	31
2	81	36
2	81	36
2	8	40
2	16	38
2	26	40
2	58	40
2	92	40
2	16	38
2	33	39
2	40	41
2	81	41
2	87	37
2	92	41
2	93	37
2	23	42
2	26	40
2	33	42
2	65	42
2	66	42
2	92	40
2	92	40
2	93	37
2	3	43
2	33	43
2	33	39
2	66	42
2	74	43
2	81	41
2	2	38
2	8	40
2	22	42
2	40	41
2	92	40
2	3	43
2	13	41
2	22	42
2	40	41
2	58	41
2	92	40
2	92	40
2	93	37
2	14	46
2	40	46
2	54	42
2	3	43
2	55	47
2	56	47
2	74	43
2	75	43
2	87	44
2	100	47
2	26	48
2	30	45
2	46	48
2	81	41
2	100	48
2	40	46
2	26	48
2	55	47
2	24	51
2	30	45
2	42	51
2	49	47
2	87	50
2	97	50
2	3	52
2	11	52
2	38	52
2	96	52
2	1	53
2	40	46
2	69	50
2	1	53
2	11	53
2	11	53
2	24	51
2	51	54
2	78	51
2	3	52
2	6	51
2	11	53
2	42	51
2	75	52
2	75	52
2	78	51
2	86	51
2	3	52
2	3	52
2	26	51
2	50	56
2	62	56
2	91	56
2	1	53
2	11	58
2	14	58
2	34	58
2	36	58
2	91	56
2	27	59
2	85	55
2	91	56
2	91	56
2	97	59
2	18	56
2	27	56
2	67	60
2	67	57
2	7	61
2	55	61
2	82	58
2	82	58
2	11	58
2	14	58
2	18	56
2	44	60
2	44	60
2	96	59
2	13	63
2	14	58
2	50	62
2	85	55
2	7	64
2	14	58
2	78	64
2	79	60
2	82	58
2	82	58
2	2	63
2	33	64
2	44	60
2	44	60
2	75	65
2	82	58
2	25	66
2	50	62
2	63	65
2	63	65
2	74	66
2	96	64
2	13	63
2	21	66
2	25	66
2	44	60
2	55	67
2	61	67
2	89	67
2	90	67
2	12	68
2	25	66
2	31	68
2	38	68
2	40	68
2	40	66
2	44	65
2	55	68
2	58	67
2	78	64
2	90	64
2	19	69
2	1	70
2	17	70
2	21	69
2	38	68
2	40	66
2	54	68
2	55	67
2	80	70
2	81	69
2	90	67
2	96	64
2	12	68
2	25	66
2	40	66
2	58	67
2	72	71
2	4	70
2	51	72
2	70	72
2	74	69
2	25	66
2	60	73
2	70	73
2	74	69
2	69	74
2	80	70
2	34	75
2	64	72
2	64	72
2	69	73
2	98	75
2	31	76
2	60	73
2	60	73
2	70	72
2	44	73
2	75	77
2	76	77
2	10	78
2	43	78
2	44	73
2	72	71
2	6	79
2	72	79
2	73	79
2	74	79
2	75	79
2	82	79
2	93	73
2	86	76
2	29	78
2	44	73
2	44	73
2	86	76
2	1	82
2	29	82
2	81	82
2	29	83
2	54	78
2	62	83
2	63	83
2	82	79
2	14	84
2	20	81
2	62	83
2	81	82
2	1	82
2	1	82
2	38	85
2	68	85
2	68	84
2	94	82
2	1	82
2	1	82
2	14	84
2	17	82
2	28	86
2	42	84
2	26	87
2	38	86
2	50	87
2	48	87
2	91	86
2	36	89
2	3	90
2	22	90
2	87	89
2	22	91
2	32	91
2	33	91
2	62	91
2	78	88
2	3	92
2	9	88
2	78	88
2	16	89
2	22	91
2	28	92
2	36	89
2	61	93
2	63	91
2	96	93
2	3	90
2	13	94
2	32	91
2	85	91
2	32	91
2	56	95
2	68	95
2	78	93
2	13	93
2	56	95
2	85	91
2	1	97
2	8	97
2	36	97
2	43	89
2	61	94
2	70	92
2	85	91
2	9	96
2	21	95
2	32	91
2	61	94
2	73	98
2	78	95
2	85	91
2	7	97
2	9	96
2	18	99
2	36	97
2	41	96
2	51	99
2	73	99
2	7	97
2	46	98
2	78	100
2	84	100
3	58	1
3	70	1
3	78	1
3	1	2
3	11	2
3	20	1
3	26	2
3	61	1
3	68	2
3	78	1
3	85	2
3	94	1
3	100	2
3	61	1
3	85	2
3	1	4
3	10	4
3	20	3
3	46	3
3	69	1
3	31	1
3	52	5
3	61	1
3	69	1
3	70	1
3	93	5
3	25	2
3	25	2
3	34	6
3	52	5
3	20	3
3	31	6
3	41	7
3	58	2
3	24	8
3	34	6
3	70	1
3	8	7
3	10	4
3	71	9
3	61	10
3	5	11
3	62	9
3	66	8
3	86	7
3	16	12
3	85	12
3	18	10
3	22	9
3	37	11
3	44	13
3	50	11
3	50	11
3	59	11
3	70	13
3	1	14
3	27	14
3	31	9
3	59	11
3	97	13
3	31	9
3	40	16
3	42	14
3	55	13
3	66	14
3	16	15
3	42	14
3	94	16
3	1	17
3	1	17
3	64	15
3	66	14
3	94	18
3	94	16
3	37	19
3	6	20
3	40	16
3	54	20
3	61	20
3	1	17
3	15	20
3	32	16
3	40	19
3	54	20
3	54	20
3	94	19
3	9	18
3	15	20
3	26	22
3	26	18
3	31	22
3	51	22
3	61	20
3	84	21
3	5	23
3	40	16
3	72	22
3	78	22
3	6	20
3	49	24
3	58	20
3	89	24
3	92	20
3	10	25
3	31	24
3	49	24
3	72	22
3	1	26
3	72	22
3	83	22
3	5	23
3	31	24
3	71	27
3	73	27
3	77	27
3	77	24
3	31	24
3	45	24
3	45	24
3	59	25
3	69	28
3	82	27
3	5	23
3	35	29
3	77	27
3	98	29
3	1	30
3	25	27
3	35	29
3	31	22
3	31	22
3	52	30
3	69	30
3	95	29
3	1	26
3	18	28
3	24	27
3	45	31
3	51	31
3	52	31
3	61	31
3	65	31
3	82	27
3	12	32
3	18	32
3	30	30
3	55	30
3	90	29
3	90	29
3	11	32
3	30	30
3	87	33
3	87	32
3	95	33
3	1	30
3	30	30
3	30	30
3	35	29
3	95	33
3	100	34
3	1	33
3	12	31
3	18	32
3	24	27
3	95	33
3	1	33
3	1	30
3	11	32
3	18	32
3	27	33
3	35	29
3	60	36
3	81	36
3	9	36
3	71	36
3	8	38
3	16	38
3	33	38
3	34	37
3	45	31
3	60	39
3	71	36
3	76	36
3	2	38
3	13	41
3	75	41
3	92	41
3	93	37
3	8	38
3	17	38
3	47	42
3	48	40
3	90	42
3	91	42
3	3	43
3	2	38
3	33	43
3	48	40
3	58	41
3	60	39
3	75	43
3	80	43
3	81	36
3	81	36
3	93	37
3	2	38
3	22	42
3	26	40
3	26	40
3	64	44
3	87	44
3	93	37
3	13	41
3	30	45
3	33	42
3	47	42
3	65	42
3	65	42
3	75	42
3	81	41
3	41	46
3	65	42
3	3	43
3	13	41
3	49	47
3	11	46
3	26	48
3	30	45
3	87	44
3	64	48
3	64	48
3	3	43
3	87	50
3	87	44
3	99	50
3	5	51
3	26	51
3	26	48
3	63	50
3	86	51
3	87	50
3	87	50
3	6	51
3	46	48
3	69	50
3	86	52
3	95	52
3	22	51
3	75	52
3	86	51
3	11	53
3	53	54
3	55	47
3	69	50
3	75	52
3	86	51
3	11	53
3	42	51
3	85	55
3	86	51
3	86	51
3	18	56
3	19	56
3	50	54
3	18	56
3	27	56
3	51	54
3	56	54
3	67	57
3	73	57
3	15	58
3	18	56
3	32	58
3	46	57
3	46	57
3	61	58
3	82	58
3	32	58
3	38	58
3	67	57
3	99	59
3	25	60
3	44	60
3	58	60
3	79	60
3	82	60
3	85	55
3	2	58
3	14	58
3	14	58
3	61	58
3	1	63
3	2	63
3	79	63
3	7	61
3	25	60
3	44	60
3	67	60
3	67	57
3	79	60
3	96	64
3	33	64
3	76	65
3	78	64
3	21	66
3	23	66
3	33	64
3	40	66
3	61	66
3	2	63
3	21	67
3	25	66
3	40	66
3	96	64
3	2	63
3	54	68
3	2	63
3	21	66
3	25	66
3	72	69
3	75	65
3	31	68
3	31	68
3	36	70
3	51	70
3	85	68
3	89	67
3	4	70
3	40	68
3	81	69
3	17	70
3	38	68
3	72	71
3	85	68
3	99	72
3	1	70
3	44	73
3	47	73
3	93	73
3	99	72
3	13	74
3	54	70
3	64	72
3	89	74
3	99	72
3	37	75
3	60	73
3	99	72
3	29	76
3	44	73
3	60	73
3	60	73
3	86	76
3	90	73
3	93	73
3	36	70
3	85	77
3	98	75
3	1	74
3	29	78
3	54	78
3	72	71
3	63	79
3	73	79
3	21	80
3	23	76
3	54	78
3	63	80
3	72	80
3	86	76
3	6	81
3	7	79
3	86	76
3	10	78
3	17	82
3	48	82
3	94	82
3	23	80
3	86	76
3	95	79
3	13	84
3	17	82
3	23	80
3	29	82
3	72	84
3	86	76
3	99	84
3	29	82
3	42	84
3	54	86
3	62	83
3	63	83
3	79	85
3	81	82
3	14	84
3	17	82
3	29	82
3	29	82
3	72	84
3	79	87
3	97	87
3	28	86
3	29	82
3	42	84
3	5	89
3	14	84
3	28	86
3	43	89
3	68	85
3	87	89
3	90	88
3	5	89
3	15	89
3	36	90
3	43	90
3	91	86
3	96	90
3	14	91
3	16	89
3	33	91
3	43	89
3	85	91
3	87	89
3	49	92
3	50	87
3	70	92
3	87	89
3	43	89
3	61	93
3	78	93
3	87	89
3	87	89
3	13	93
3	32	91
3	41	94
3	51	92
3	62	91
3	72	92
3	12	95
3	13	93
3	13	93
3	49	92
3	78	95
3	96	93
3	36	96
3	6	97
3	33	97
3	35	97
3	49	92
3	68	95
3	85	91
3	12	95
3	26	98
3	61	94
3	73	98
3	1	96
3	18	100
3	41	100
3	65	100
3	73	100
3	78	95
3	92	100

## Sheet: Sheet7
1	19	1
1	88	1
1	95	1
1	11	1
1	25	2
1	55	2
1	56	2
1	8	1
1	70	3
1	74	3
1	88	1
1	93	1
1	39	4
1	45	1
1	55	2
1	56	2
1	83	4
1	87	4
1	6	3
1	19	1
1	32	3
1	82	5
1	17	4
1	19	4
1	64	6
1	6	3
1	8	1
1	59	7
1	64	6
1	70	3
1	6	3
1	19	4
1	75	8
1	79	8
1	83	4
1	32	3
1	50	9
1	52	9
1	53	9
1	57	8
1	79	8
1	91	9
1	93	7
1	50	9
1	75	8
1	86	10
1	2	11
1	18	11
1	35	9
1	2	11
1	26	11
1	86	10
1	86	10
1	49	13
1	73	9
1	85	13
1	6	10
1	24	14
1	59	14
1	66	12
1	11	11
1	24	14
1	35	9
1	42	11
1	48	15
1	85	13
1	100	15
1	6	10
1	6	10
1	11	11
1	85	13
1	93	16
1	42	11
1	55	17
1	57	17
1	73	9
1	11	11
1	55	17
1	55	17
1	77	14
1	77	14
1	99	18
1	2	16
1	11	11
1	18	19
1	31	17
1	36	17
1	37	14
1	37	14
1	62	19
1	74	17
1	77	14
1	93	16
1	93	16
1	1	20
1	7	19
1	31	17
1	62	19
1	74	17
1	74	17
1	89	20
1	18	19
1	31	17
1	53	21
1	54	21
1	31	21
1	36	17
1	37	14
1	53	21
1	62	19
1	88	22
1	21	19
1	62	19
1	74	17
1	1	20
1	7	19
1	21	24
1	31	21
1	62	21
1	97	24
1	18	24
1	29	21
1	85	23
1	1	24
1	14	26
1	60	22
1	78	22
1	78	22
1	1	24
1	21	19
1	21	19
1	31	21
1	43	25
1	50	27
1	60	27
1	62	21
1	69	24
1	94	27
1	29	28
1	38	27
1	43	25
1	59	28
1	94	27
1	97	24
1	97	24
1	16	25
1	18	24
1	59	29
1	59	28
1	14	26
1	94	27
1	2	31
1	19	31
1	65	31
1	17	32
1	18	32
1	19	32
1	16	25
1	16	25
1	51	32
1	68	25
1	68	25
1	97	32
1	16	25
1	27	33
1	57	33
1	65	31
1	2	31
1	34	33
1	34	33
1	57	33
1	68	25
1	81	31
1	12	33
1	33	35
1	81	31
1	90	35
1	18	32
1	45	36
1	47	35
1	51	32
1	68	25
1	90	36
1	90	35
1	1	36
1	6	31
1	12	33
1	19	37
1	33	35
1	45	37
1	45	36
1	47	35
1	57	33
1	81	31
1	12	33
1	19	37
1	34	33
1	42	38
1	64	38
1	71	38
1	81	31
1	22	37
1	47	35
1	69	39
1	86	39
1	1	36
1	1	36
1	42	38
1	64	38
1	95	40
1	98	37
1	1	36
1	22	37
1	45	37
1	64	41
1	22	37
1	22	37
1	31	42
1	64	42
1	79	41
1	16	41
1	22	37
1	58	43
1	60	42
1	75	43
1	76	42
1	94	43
1	50	41
1	58	44
1	74	44
1	3	44
1	39	42
1	64	41
1	91	45
1	31	42
1	39	42
1	50	41
1	74	44
1	91	45
1	19	47
1	16	41
1	22	43
1	40	47
1	50	41
1	58	43
1	74	44
1	84	47
1	98	48
1	99	48
1	37	49
1	53	49
1	66	49
1	77	49
1	80	48
1	91	45
1	25	50
1	47	51
1	72	51
1	77	49
1	5	52
1	30	48
1	30	48
1	47	52
1	53	49
1	66	52
1	93	52
1	5	53
1	25	50
1	55	49
1	60	49
1	60	49
1	89	53
1	17	54
1	25	50
1	30	54
1	30	48
1	30	48
1	47	51
1	72	51
1	93	52
1	15	55
1	16	55
1	18	51
1	36	51
1	47	51
1	52	55
1	78	55
1	3	56
1	18	51
1	36	51
1	60	49
1	93	52
1	94	52
1	5	53
1	10	57
1	15	55
1	37	57
1	86	56
1	96	57
1	15	55
1	17	54
1	17	54
1	18	51
1	28	56
1	78	55
1	57	58
1	86	56
1	86	56
1	36	60
1	37	57
1	8	61
1	22	61
1	28	61
1	44	57
1	94	61
1	28	61
1	34	62
1	88	62
1	8	61
1	10	59
1	57	63
1	1	64
1	18	64
1	34	64
1	44	57
1	44	57
1	76	64
1	100	64
1	41	65
1	57	63
1	5	64
1	10	59
1	41	65
1	57	63
1	75	66
1	76	64
1	93	63
1	10	59
1	51	64
1	70	67
1	72	67
1	5	64
1	12	68
1	28	64
1	51	64
1	60	68
1	3	69
1	41	65
1	75	66
1	87	65
1	93	63
1	5	64
1	13	67
1	25	69
1	38	70
1	63	66
1	10	71
1	12	68
1	13	67
1	79	71
1	82	69
1	60	68
1	68	69
1	10	73
1	20	70
1	52	73
1	2	70
1	9	74
1	52	73
1	2	70
1	9	74
1	19	75
1	36	73
1	49	75
1	52	75
1	61	75
1	63	74
1	20	70
1	36	73
1	36	73
1	49	75
1	61	75
1	4	77
1	10	73
1	36	73
1	52	73
1	63	74
1	82	77
1	92	77
1	2	70
1	57	78
1	63	74
1	29	75
1	36	79
1	36	73
1	72	79
1	90	79
1	57	78
1	71	80
1	90	79
1	4	81
1	18	78
1	36	79
1	36	79
1	36	73
1	48	78
1	82	77
1	44	81
1	48	78
1	65	82
1	68	81
1	14	79
1	19	83
1	24	79
1	36	79
1	63	83
1	65	83
1	98	81
1	2	84
1	4	81
1	4	81
1	12	81
1	18	78
1	63	84
1	96	84
1	10	85
1	12	81
1	57	85
1	68	81
1	68	81
1	96	84
1	10	85
1	12	81
1	44	81
1	58	85
1	96	84
1	28	87
1	44	81
1	28	87
1	8	88
1	33	86
1	36	86
1	44	81
1	79	86
1	91	86
1	18	90
1	28	87
1	1	91
1	1	87
1	18	90
1	28	87
1	51	91
1	68	91
1	79	86
1	23	88
1	33	86
1	68	91
1	68	91
1	91	86
1	16	91
1	27	88
1	79	86
1	98	93
1	1	87
1	12	94
1	44	93
1	55	91
1	57	90
1	70	91
1	75	94
1	79	94
1	70	91
1	79	94
1	18	96
1	24	94
1	27	88
1	8	96
1	27	88
1	43	97
1	44	93
1	90	97
1	23	97
1	37	98
1	46	91
1	56	98
1	88	98
1	17	97
1	18	96
1	43	99
1	43	97
1	46	91
1	4	96
1	24	94
1	37	98
2	11	1
2	93	1
2	100	1
2	19	1
2	39	2
2	54	2
2	56	2
2	57	2
2	93	1
2	32	3
2	51	3
2	95	1
2	11	1
2	19	1
2	24	4
2	39	2
2	69	4
2	93	1
2	3	5
2	6	5
2	39	4
2	70	3
2	88	1
2	88	1
2	17	4
2	19	4
2	93	1
2	3	5
2	8	1
2	17	4
2	32	3
2	93	7
2	93	1
2	3	5
2	32	3
2	44	8
2	57	8
2	69	4
2	87	4
2	99	8
2	19	4
2	35	9
2	57	9
2	73	9
2	93	7
2	6	10
2	12	10
2	17	4
2	35	9
2	35	9
2	64	6
2	79	8
2	99	8
2	6	10
2	11	11
2	12	10
2	26	11
2	31	11
2	42	11
2	43	11
2	79	8
2	79	8
2	6	10
2	35	9
2	57	8
2	69	12
2	17	13
2	24	13
2	35	9
2	69	12
2	93	7
2	2	14
2	2	11
2	17	13
2	65	13
2	64	15
2	65	15
2	65	13
2	73	9
2	2	16
2	2	14
2	17	13
2	37	14
2	42	11
2	49	13
2	85	13
2	94	16
2	22	17
2	31	17
2	59	14
2	74	17
2	83	17
2	1	18
2	6	10
2	11	11
2	59	14
2	73	18
2	74	17
2	17	19
2	22	17
2	42	15
2	48	15
2	48	15
2	1	20
2	2	16
2	18	19
2	36	17
2	55	17
2	57	17
2	62	19
2	72	20
2	31	21
2	62	21
2	62	19
2	21	19
2	60	22
2	72	20
2	78	22
2	89	20
2	36	17
2	37	14
2	78	23
2	85	23
2	89	20
2	1	24
2	7	19
2	53	24
2	72	20
2	96	24
2	16	25
2	18	24
2	40	25
2	43	25
2	62	21
2	78	22
2	85	23
2	96	24
2	1	24
2	7	26
2	7	24
2	12	26
2	29	26
2	31	21
2	51	26
2	52	26
2	60	22
2	7	24
2	14	26
2	29	27
2	38	27
2	60	22
2	7	26
2	7	26
2	16	25
2	53	24
2	69	24
2	18	24
2	29	21
2	58	29
2	60	27
2	68	25
2	94	27
2	7	30
2	7	26
2	51	26
2	88	30
2	94	27
2	50	27
2	94	27
2	99	31
2	29	28
2	39	32
2	58	32
2	93	32
2	2	31
2	12	33
2	68	25
2	81	31
2	79	34
2	81	31
2	6	31
2	11	35
2	19	31
2	47	35
2	51	32
2	58	32
2	93	32
2	97	32
2	1	36
2	7	36
2	18	32
2	22	37
2	45	36
2	74	37
2	99	37
2	100	37
2	32	38
2	34	33
2	45	36
2	53	38
2	90	35
2	1	36
2	19	37
2	41	39
2	74	37
2	90	35
2	32	40
2	41	40
2	69	40
2	69	39
2	95	40
2	22	37
2	45	37
2	81	41
2	16	41
2	76	42
2	95	42
2	95	40
2	95	40
2	7	43
2	31	42
2	41	39
2	64	41
2	76	42
2	81	41
2	3	44
2	22	37
2	39	42
2	49	44
2	10	42
2	39	42
2	49	44
2	75	43
2	94	43
2	94	43
2	95	42
2	2	46
2	39	42
2	50	41
2	60	42
2	1	47
2	3	44
2	19	47
2	39	42
2	88	47
2	94	43
2	94	43
2	10	42
2	22	43
2	30	48
2	31	48
2	50	41
2	11	49
2	10	42
2	30	48
2	52	49
2	55	49
2	60	49
2	2	46
2	2	46
2	30	48
2	18	51
2	36	51
2	37	49
2	40	47
2	60	49
2	84	47
2	96	51
2	7	52
2	25	50
2	55	49
2	94	52
2	96	52
2	47	51
2	53	49
2	60	49
2	77	49
2	80	48
2	96	51
2	25	50
2	30	48
2	52	54
2	60	49
2	7	52
2	17	54
2	47	51
2	52	55
2	63	55
2	72	51
2	93	52
2	13	56
2	17	54
2	36	51
2	81	54
2	86	56
2	88	53
2	44	57
2	44	53
2	52	57
2	76	57
2	78	57
2	81	54
2	81	54
2	10	57
2	36	58
2	44	57
2	52	55
2	57	58
2	1	59
2	10	59
2	15	55
2	9	60
2	35	60
2	42	61
2	57	58
2	78	57
2	86	56
2	57	58
2	66	62
2	69	61
2	44	57
2	76	62
2	87	63
2	93	63
2	100	63
2	28	64
2	51	64
2	10	59
2	22	61
2	39	65
2	51	64
2	93	65
2	93	63
2	5	64
2	48	66
2	51	64
2	66	62
2	76	66
2	98	66
2	1	64
2	13	67
2	18	64
2	33	67
2	41	65
2	48	66
2	71	67
2	74	67
2	13	67
2	18	64
2	75	66
2	12	68
2	13	67
2	25	69
2	41	65
2	46	69
2	60	68
2	68	69
2	93	65
2	2	70
2	18	70
2	33	67
2	39	69
2	39	69
2	54	70
2	68	70
2	70	67
2	2	70
2	3	69
2	25	69
2	25	69
2	72	67
2	88	71
2	54	70
2	63	66
2	68	69
2	79	71
2	25	69
2	25	69
2	39	69
2	20	70
2	36	73
2	54	70
2	4	75
2	2	70
2	19	75
2	29	75
2	63	74
2	10	73
2	61	76
2	74	72
2	84	76
2	96	73
2	61	77
2	9	74
2	18	78
2	29	75
2	36	73
2	48	78
2	52	75
2	14	79
2	49	75
2	99	79
2	72	80
2	72	79
2	72	79
2	12	81
2	36	73
2	72	79
2	82	81
2	98	81
2	2	82
2	4	81
2	18	78
2	36	79
2	48	78
2	57	78
2	90	79
2	90	79
2	4	81
2	12	81
2	36	79
2	72	79
2	82	83
2	90	79
2	44	81
2	62	84
2	12	81
2	48	78
2	55	85
2	96	85
2	33	86
2	36	86
2	37	86
2	39	84
2	39	84
2	44	81
2	79	86
2	96	84
2	1	87
2	14	79
2	24	79
2	33	86
2	36	86
2	44	81
2	58	85
2	79	86
2	82	83
2	1	87
2	2	84
2	8	88
2	12	81
2	23	88
2	28	87
2	33	86
2	79	86
2	91	86
2	96	88
2	6	89
2	23	89
2	44	81
2	76	89
2	88	89
2	1	87
2	8	88
2	23	88
2	33	86
2	39	84
2	91	86
2	91	86
2	28	87
2	70	91
2	1	91
2	27	88
2	33	86
2	44	93
2	63	93
2	88	89
2	1	91
2	18	90
2	46	91
2	57	90
2	44	93
2	44	93
2	70	91
2	79	94
2	94	95
2	8	96
2	27	88
2	57	90
2	70	91
2	23	97
2	57	90
2	69	97
2	23	97
2	31	98
2	32	97
2	1	98
2	4	96
2	30	99
2	68	99
2	90	97
2	23	97
2	43	97
2	57	97
2	75	100
2	90	97
3	8	1
3	45	1
3	61	1
3	76	1
3	34	2
3	61	1
3	6	3
3	34	2
3	57	2
3	88	3
3	8	1
3	11	1
3	17	4
3	19	4
3	25	2
3	32	3
3	50	4
3	51	3
3	55	2
3	68	4
3	11	1
3	45	1
3	74	3
3	17	4
3	25	2
3	39	4
3	67	6
3	69	4
3	79	6
3	93	1
3	24	4
3	61	7
3	64	7
3	87	4
3	36	8
3	44	8
3	77	8
3	89	9
3	93	7
3	44	10
3	50	9
3	67	6
3	79	8
3	87	10
3	28	11
3	43	11
3	44	8
3	50	9
3	61	7
3	18	11
3	25	12
3	28	11
3	50	9
3	66	12
3	18	11
3	49	13
3	57	9
3	65	13
3	66	13
3	66	12
3	2	11
3	24	14
3	26	11
3	31	11
3	37	14
3	35	9
3	66	12
3	77	14
3	73	9
3	42	15
3	69	12
3	76	15
3	85	13
3	1	16
3	42	11
3	76	16
3	73	9
3	85	13
3	85	13
3	2	14
3	11	11
3	17	13
3	17	13
3	36	17
3	57	17
3	59	14
3	64	17
3	85	13
3	42	11
3	55	17
3	64	15
3	77	14
3	7	19
3	11	19
3	21	19
3	48	15
3	64	15
3	77	14
3	93	16
3	94	16
3	36	17
3	54	20
3	74	17
3	83	17
3	7	19
3	29	21
3	31	17
3	36	17
3	53	21
3	59	22
3	73	18
3	87	22
3	21	19
3	7	24
3	7	19
3	18	24
3	53	21
3	59	22
3	69	24
3	78	22
3	97	24
3	68	25
3	88	22
3	95	25
3	7	24
3	21	19
3	29	21
3	31	21
3	94	26
3	97	24
3	14	26
3	43	25
3	53	24
3	7	26
3	38	27
3	7	24
3	38	27
3	85	23
3	94	27
3	100	29
3	50	27
3	69	30
3	6	31
3	7	30
3	50	27
3	68	25
3	68	25
3	69	24
3	81	31
3	2	31
3	29	28
3	37	32
3	58	32
3	59	28
3	81	32
3	7	30
3	7	30
3	34	33
3	56	33
3	81	31
3	19	31
3	27	34
3	39	32
3	81	31
3	97	32
3	51	32
3	68	25
3	79	34
3	97	32
3	17	32
3	17	32
3	33	36
3	81	31
3	6	31
3	27	33
3	55	37
3	98	37
3	11	35
3	45	36
3	74	37
3	19	37
3	45	36
3	71	38
3	88	39
3	1	36
3	22	37
3	53	38
3	16	41
3	32	38
3	41	41
3	50	41
3	53	38
3	64	38
3	74	37
3	79	41
3	81	31
3	10	42
3	39	42
3	60	42
3	81	31
3	10	43
3	16	41
3	22	43
3	86	39
3	88	39
3	7	43
3	10	42
3	79	41
3	10	42
3	10	42
3	22	37
3	39	42
3	90	45
3	91	45
3	10	43
3	37	47
3	85	47
3	10	42
3	37	48
3	39	42
3	80	48
3	88	47
3	3	44
3	12	49
3	61	49
3	80	48
3	1	47
3	11	49
3	22	43
3	66	49
3	77	49
3	25	51
3	77	49
3	30	48
3	53	49
3	60	49
3	61	49
3	72	51
3	80	48
3	37	49
3	44	53
3	47	51
3	61	49
3	88	53
3	58	54
3	81	54
3	4	55
3	5	52
3	7	52
3	25	51
3	30	55
3	79	55
3	81	54
3	1	56
3	5	52
3	17	54
3	18	51
3	28	56
3	47	52
3	66	52
3	94	52
3	12	57
3	30	54
3	44	53
3	60	49
3	60	49
3	13	56
3	18	51
3	28	56
3	37	57
3	44	58
3	81	54
3	1	56
3	36	51
3	36	51
3	44	57
3	70	59
3	96	57
3	10	57
3	36	58
3	10	57
3	20	61
3	28	56
3	44	53
3	57	58
3	69	61
3	86	56
3	22	61
3	42	61
3	76	62
3	88	62
3	8	61
3	20	61
3	58	63
3	88	62
3	5	64
3	19	64
3	33	64
3	94	61
3	5	64
3	8	61
3	58	63
3	69	61
3	87	65
3	5	64
3	10	59
3	18	64
3	63	66
3	88	62
3	18	64
3	28	64
3	74	67
3	87	63
3	87	63
3	25	68
3	51	64
3	93	68
3	5	64
3	28	64
3	39	69
3	82	69
3	1	70
3	5	64
3	19	70
3	20	70
3	33	67
3	25	69
3	46	69
3	82	71
3	13	67
3	38	70
3	60	68
3	74	72
3	36	73
3	68	69
3	74	72
3	96	73
3	1	70
3	10	71
3	62	74
3	63	74
3	82	71
3	43	75
3	68	69
3	79	71
3	19	75
3	63	74
3	2	70
3	19	75
3	36	73
3	36	73
3	63	74
3	4	78
3	2	70
3	14	78
3	18	78
3	29	78
3	29	75
3	63	74
3	82	78
3	4	77
3	12	79
3	24	79
3	49	75
3	57	78
3	61	75
3	63	74
3	74	72
3	4	77
3	14	79
3	72	79
3	74	72
3	82	80
3	2	81
3	24	79
3	29	78
3	36	79
3	44	81
3	45	81
3	68	81
3	90	79
3	99	81
3	99	79
3	18	78
3	24	79
3	24	79
3	68	82
3	98	82
3	18	78
3	48	78
3	68	81
3	12	81
3	14	79
3	14	79
3	39	84
3	44	81
3	12	81
3	18	78
3	24	79
3	44	81
3	55	85
3	58	85
3	60	85
3	61	85
3	79	85
3	24	79
3	24	79
3	33	86
3	45	86
3	44	81
3	44	81
3	65	82
3	91	86
3	33	86
3	68	81
3	68	81
3	76	87
3	91	86
3	27	88
3	28	88
3	33	86
3	63	84
3	68	81
3	91	86
3	12	81
3	23	88
3	28	87
3	37	86
3	8	88
3	8	88
3	33	86
3	33	86
3	57	90
3	58	85
3	6	89
3	16	91
3	17	91
3	33	86
3	46	91
3	55	91
3	1	87
3	37	92
3	36	86
3	44	92
3	87	92
3	88	89
3	1	87
3	1	87
3	33	86
3	46	91
3	57	90
3	24	94
3	27	88
3	44	93
3	51	91
3	76	94
3	1	91
3	43	95
3	79	94
3	4	96
3	23	96
3	63	93
3	70	91
3	17	97
3	24	94
3	32	97
3	57	97
3	1	98
3	24	94
3	79	94
3	8	96
3	43	97
3	50	99
3	69	97
3	1	98
3	37	98
3	46	91
3	90	97
3	100	100

## Sheet: Sheet8
1	22	1
1	45	1
1	63	1
1	77	1
1	87	1
1	7	1
1	7	1
1	34	1
1	54	2
1	94	1
1	3	2
1	34	3
1	34	1
1	34	1
1	34	1
1	54	2
1	54	2
1	60	2
1	77	1
1	83	3
1	2	4
1	3	2
1	3	2
1	20	1
1	22	1
1	54	2
1	77	1
1	94	1
1	94	1
1	2	4
1	2	4
1	14	5
1	15	3
1	22	1
1	34	3
1	77	1
1	82	5
1	7	1
1	14	5
1	28	3
1	49	6
1	68	6
1	1	7
1	3	2
1	20	1
1	28	7
1	54	3
1	60	2
1	80	7
1	2	4
1	15	3
1	88	6
1	77	9
1	88	6
1	1	7
1	43	8
1	66	10
1	8	9
1	28	7
1	41	8
1	73	11
1	85	10
1	13	9
1	37	12
1	66	10
1	77	9
1	84	12
1	85	10
1	95	10
1	3	13
1	41	8
1	64	13
1	65	12
1	73	11
1	84	12
1	95	10
1	8	9
1	37	14
1	75	11
1	84	12
1	85	10
1	3	13
1	35	15
1	64	13
1	75	11
1	95	10
1	15	16
1	56	16
1	22	17
1	30	14
1	43	16
1	54	16
1	75	11
1	92	17
1	93	17
1	8	18
1	35	15
1	37	14
1	64	14
1	73	16
1	35	17
1	41	20
1	64	16
1	73	16
1	30	14
1	35	17
1	41	20
1	54	21
1	72	21
1	73	16
1	84	18
1	4	22
1	60	22
1	13	19
1	36	23
1	41	20
1	60	22
1	87	23
1	28	20
1	64	16
1	72	21
1	2	25
1	4	22
1	4	22
1	36	23
1	72	25
1	73	16
1	10	26
1	13	19
1	21	26
1	22	21
1	28	20
1	69	26
1	71	26
1	78	26
1	80	26
1	93	26
1	34	25
1	36	23
1	44	25
1	78	26
1	87	24
1	21	26
1	22	21
1	34	25
1	69	26
1	87	24
1	26	29
1	32	29
1	34	25
1	56	30
1	56	29
1	65	30
1	76	30
1	1	28
1	6	31
1	9	27
1	41	28
1	65	30
1	71	31
1	83	31
1	93	27
1	17	29
1	65	30
1	87	24
1	87	24
1	9	27
1	41	28
1	71	31
1	82	33
1	26	29
1	26	29
1	26	29
1	54	34
1	56	34
1	65	30
1	71	31
1	76	30
1	83	31
1	89	33
1	93	27
1	1	32
1	17	29
1	32	32
1	41	28
1	47	35
1	54	35
1	54	34
1	8	36
1	47	35
1	76	33
1	88	36
1	89	33
1	2	37
1	40	37
1	46	37
1	47	35
1	54	37
1	89	33
1	26	38
1	26	35
1	40	37
1	47	35
1	54	38
1	61	37
1	76	33
1	88	36
1	8	36
1	47	35
1	93	39
1	98	39
1	2	37
1	14	40
1	25	40
1	26	40
1	26	38
1	54	37
1	59	40
1	76	33
1	93	39
1	40	37
1	59	40
1	61	37
1	23	42
1	33	38
1	45	42
1	89	42
1	95	39
1	77	39
1	20	44
1	23	42
1	25	40
1	32	44
1	59	40
1	76	40
1	76	40
1	86	43
1	89	42
1	89	42
1	9	45
1	12	41
1	17	45
1	33	38
1	45	42
1	63	45
1	96	45
1	1	42
1	20	44
1	32	46
1	54	46
1	96	46
1	17	45
1	63	45
1	77	39
1	77	39
1	85	43
1	12	41
1	17	45
1	28	48
1	31	48
1	84	48
1	24	49
1	37	48
1	83	49
1	12	50
1	24	49
1	63	48
1	24	51
1	31	48
1	37	48
1	63	48
1	63	48
1	95	50
1	95	50
1	37	48
1	84	48
1	61	49
1	83	49
1	7	54
1	19	54
1	24	54
1	49	53
1	52	53
1	82	54
1	90	54
1	29	54
1	32	53
1	6	56
1	19	54
1	61	49
1	76	56
1	36	53
1	46	55
1	69	56
1	98	57
1	6	58
1	13	58
1	15	58
1	32	53
1	62	55
1	46	55
1	62	55
1	69	56
1	76	56
1	81	56
1	13	58
1	19	56
1	62	60
1	95	58
1	24	57
1	38	60
1	46	58
1	69	56
1	69	56
1	81	56
1	5	62
1	6	58
1	19	56
1	24	57
1	69	56
1	24	57
1	45	63
1	57	60
1	82	63
1	81	56
1	30	60
1	38	60
1	46	58
1	62	60
1	69	61
1	82	63
1	95	58
1	4	65
1	13	65
1	16	58
1	52	63
1	63	65
1	69	61
1	69	61
1	77	65
1	5	62
1	52	63
1	67	64
1	77	65
1	95	66
1	16	58
1	30	60
1	69	61
1	13	65
1	45	65
1	60	68
1	63	65
1	63	65
1	2	65
1	11	69
1	13	65
1	38	66
1	16	70
1	28	70
1	38	66
1	60	68
1	45	65
1	57	71
1	16	70
1	51	72
1	68	70
1	51	73
1	51	72
1	57	73
1	89	69
1	89	69
1	28	70
1	33	72
1	51	72
1	57	71
1	68	74
1	94	70
1	57	71
1	10	76
1	21	76
1	87	74
1	20	77
1	21	76
1	33	74
1	68	74
1	68	74
1	85	74
1	85	74
1	89	69
1	89	69
1	1	77
1	15	74
1	21	76
1	51	74
1	75	78
1	85	74
1	85	74
1	51	74
1	21	76
1	31	76
1	33	74
1	33	74
1	62	76
1	72	80
1	75	78
1	85	74
1	15	74
1	30	77
1	85	74
1	43	81
1	72	80
1	86	82
1	85	74
1	95	80
1	2	82
1	14	82
1	42	83
1	49	80
1	62	76
1	6	77
1	31	76
1	49	80
1	58	83
1	64	82
1	72	80
1	94	81
1	21	82
1	42	83
1	43	81
1	49	85
1	58	83
1	64	82
1	78	85
1	86	82
1	14	82
1	21	82
1	37	86
1	43	81
1	49	85
1	14	82
1	21	82
1	58	83
1	82	83
1	1	87
1	6	77
1	22	88
1	21	82
1	45	88
1	26	85
1	45	88
1	65	87
1	92	87
1	35	90
1	56	87
1	84	90
1	92	87
1	26	85
1	26	85
1	91	89
1	13	92
1	34	92
1	35	90
1	56	92
1	10	93
1	26	85
1	56	92
1	17	90
1	22	94
1	49	94
1	56	87
1	91	89
1	2	93
1	13	92
1	34	92
1	44	91
1	66	93
1	17	90
1	34	92
1	61	96
1	66	93
1	73	94
1	90	96
1	30	97
1	72	97
1	83	97
1	3	98
1	30	97
1	61	96
1	3	99
1	59	98
1	81	99
1	86	96
1	97	97
1	9	99
1	20	99
1	30	97
1	46	100
1	59	98
1	97	97
2	20	1
2	34	1
2	63	1
2	88	1
2	7	1
2	22	1
2	44	2
2	45	1
2	60	2
2	74	2
2	87	1
2	87	1
2	34	1
2	34	1
2	45	1
2	54	3
2	87	1
2	88	1
2	15	3
2	20	1
2	34	3
2	82	4
2	94	1
2	2	4
2	14	5
2	20	1
2	77	1
2	87	1
2	20	1
2	34	3
2	44	2
2	88	6
2	94	1
2	3	2
2	13	7
2	60	2
2	68	6
2	3	2
2	14	5
2	14	5
2	43	8
2	49	6
2	82	5
2	88	6
2	1	7
2	8	9
2	10	9
2	88	6
2	88	6
2	98	9
2	43	8
2	49	6
2	54	3
2	77	9
2	88	6
2	98	9
2	8	9
2	24	11
2	37	11
2	38	10
2	51	11
2	85	10
2	85	10
2	8	9
2	24	11
2	38	10
2	43	8
2	85	10
2	2	13
2	8	9
2	8	9
2	49	13
2	65	12
2	73	11
2	85	10
2	3	13
2	30	14
2	38	10
2	64	14
2	64	13
2	94	11
2	24	11
2	41	8
2	48	15
2	51	11
2	64	13
2	75	11
2	37	12
2	43	16
2	64	16
2	28	17
2	30	17
2	35	17
2	56	16
2	15	16
2	22	17
2	4	19
2	8	19
2	13	19
2	43	16
2	48	15
2	73	16
2	84	18
2	88	18
2	28	20
2	84	18
2	92	17
2	13	19
2	35	17
2	54	16
2	22	21
2	28	20
2	37	22
2	41	20
2	8	19
2	28	20
2	41	20
2	59	23
2	64	16
2	84	18
2	19	21
2	36	24
2	35	17
2	51	24
2	99	24
2	1	25
2	34	25
2	84	25
2	84	18
2	22	21
2	36	23
2	44	25
2	51	24
2	66	26
2	72	25
2	80	26
2	9	27
2	13	19
2	22	21
2	51	24
2	72	25
2	80	26
2	93	27
2	93	26
2	1	28
2	21	26
2	51	24
2	60	28
2	87	24
2	9	27
2	17	29
2	22	21
2	32	29
2	34	29
2	44	25
2	56	29
2	78	26
2	10	26
2	32	29
2	48	30
2	78	26
2	1	32
2	26	29
2	48	32
2	48	30
2	48	30
2	60	28
2	65	30
2	71	32
2	71	31
2	1	28
2	17	29
2	26	33
2	40	33
2	64	33
2	76	33
2	76	30
2	9	27
2	9	27
2	16	33
2	71	31
2	76	30
2	93	27
2	1	28
2	26	35
2	26	33
2	76	33
2	89	33
2	93	27
2	16	33
2	54	36
2	64	33
2	76	33
2	100	36
2	1	32
2	14	36
2	40	33
2	40	33
2	70	37
2	76	33
2	82	33
2	2	38
2	14	38
2	70	37
2	26	38
2	70	37
2	70	37
2	77	39
2	8	36
2	35	37
2	46	37
2	46	37
2	46	37
2	70	40
2	2	37
2	14	40
2	22	42
2	33	38
2	39	42
2	45	42
2	59	40
2	64	42
2	95	39
2	45	43
2	70	40
2	86	43
2	93	39
2	70	40
2	86	43
2	7	45
2	45	42
2	12	41
2	33	38
2	76	40
2	17	45
2	54	47
2	54	46
2	63	45
2	63	45
2	74	47
2	86	43
2	37	48
2	42	48
2	47	48
2	63	48
2	74	47
2	2	49
2	1	42
2	28	48
2	42	48
2	54	46
2	61	49
2	7	50
2	13	50
2	42	48
2	73	50
2	28	48
2	47	48
2	7	52
2	24	52
2	28	48
2	32	53
2	34	53
2	36	53
2	39	53
2	37	48
2	83	49
2	90	53
2	7	54
2	7	50
2	29	54
2	32	53
2	37	48
2	52	53
2	52	53
2	81	54
2	24	55
2	49	53
2	49	53
2	16	56
2	19	56
2	24	54
2	29	54
2	32	53
2	49	53
2	52	53
2	69	56
2	7	54
2	52	53
2	76	56
2	90	54
2	90	54
2	96	57
2	46	58
2	69	56
2	82	54
2	95	58
2	36	53
2	69	56
2	69	56
2	95	59
2	6	60
2	15	58
2	40	60
2	45	60
2	57	60
2	58	60
2	62	55
2	95	60
2	6	58
2	38	60
2	69	61
2	98	57
2	15	58
2	16	58
2	38	60
2	52	59
2	57	60
2	81	56
2	95	58
2	5	62
2	20	63
2	16	58
2	38	60
2	52	59
2	62	60
2	69	56
2	81	56
2	5	62
2	24	57
2	52	63
2	52	59
2	67	64
2	4	65
2	46	58
2	78	65
2	89	65
2	19	63
2	38	66
2	52	66
2	52	63
2	4	65
2	4	65
2	63	65
2	89	65
2	52	63
2	63	68
2	95	66
2	13	65
2	19	69
2	16	58
2	89	69
2	8	70
2	68	70
2	77	67
2	11	69
2	63	68
2	2	72
2	2	65
2	26	72
2	63	68
2	99	72
2	26	72
2	38	66
2	51	73
2	57	71
2	89	69
2	94	70
2	99	73
2	15	74
2	22	74
2	33	74
2	39	74
2	44	74
2	51	74
2	51	72
2	68	70
2	85	74
2	87	74
2	26	72
2	44	74
2	57	71
2	64	74
2	31	76
2	85	76
2	85	74
2	1	77
2	10	77
2	10	76
2	14	76
2	30	77
2	31	77
2	64	74
2	82	77
2	96	77
2	14	76
2	49	78
2	73	78
2	85	74
2	96	77
2	26	79
2	29	79
2	62	76
2	82	77
2	85	76
2	85	74
2	15	74
2	37	80
2	49	80
2	49	78
2	73	78
2	75	78
2	6	77
2	20	77
2	43	81
2	62	76
2	94	81
2	95	80
2	2	82
2	1	77
2	21	82
2	43	81
2	49	78
2	64	82
2	72	80
2	75	78
2	82	82
2	21	82
2	26	79
2	31	76
2	37	80
2	79	83
2	2	82
2	64	82
2	79	84
2	95	80
2	95	80
2	14	82
2	43	81
2	94	81
2	37	86
2	38	86
2	43	81
2	64	82
2	71	86
2	94	81
2	1	87
2	6	87
2	6	77
2	21	82
2	47	87
2	65	87
2	71	87
2	49	85
2	71	86
2	84	88
2	82	83
2	92	87
2	94	81
2	22	88
2	82	83
2	91	89
2	1	87
2	1	87
2	17	90
2	14	82
2	76	90
2	1	87
2	22	91
2	26	85
2	45	88
2	56	87
2	76	91
2	82	83
2	82	83
2	91	89
2	92	87
2	17	92
2	22	88
2	26	85
2	17	90
2	42	93
2	56	87
2	66	93
2	65	87
2	76	90
2	91	89
2	13	92
2	17	90
2	32	94
2	42	93
2	49	94
2	56	87
2	73	94
2	76	90
2	84	90
2	84	90
2	91	94
2	13	92
2	34	92
2	40	95
2	91	89
2	2	93
2	2	93
2	2	93
2	13	92
2	40	95
2	49	94
2	15	97
2	32	94
2	40	95
2	83	97
2	30	97
2	44	91
2	59	98
2	61	96
2	61	96
2	66	93
2	20	99
2	40	95
2	61	96
2	66	93
2	83	99
2	90	96
2	3	100
2	56	100
2	67	100
2	90	96
3	7	1
3	44	1
3	49	1
3	67	1
3	86	1
3	94	1
3	3	2
3	7	1
3	39	2
3	58	2
3	60	2
3	15	3
3	28	3
3	34	1
3	39	2
3	54	3
3	60	2
3	67	1
3	77	1
3	3	2
3	34	3
3	44	4
3	45	1
3	54	2
3	83	3
3	7	1
3	7	1
3	15	3
3	60	2
3	70	6
3	71	6
3	80	6
3	83	3
3	94	1
3	59	7
3	80	7
3	82	5
3	2	4
3	28	3
3	41	8
3	80	7
3	13	9
3	41	9
3	43	8
3	55	9
3	18	10
3	38	10
3	49	6
3	54	10
3	70	6
3	85	10
3	95	10
3	23	11
3	38	10
3	41	8
3	75	11
3	85	10
3	94	11
3	37	11
3	65	12
3	83	12
3	94	11
3	4	13
3	13	9
3	37	12
3	49	13
3	55	9
3	55	9
3	64	13
3	84	12
3	84	12
3	85	10
3	2	13
3	66	10
3	4	13
3	24	11
3	24	11
3	30	14
3	85	10
3	95	10
3	14	16
3	15	16
3	13	9
3	45	16
3	54	16
3	62	16
3	73	16
3	22	17
3	29	17
3	30	14
3	62	16
3	73	16
3	73	16
3	84	18
3	88	18
3	8	18
3	35	15
3	62	16
3	88	18
3	92	17
3	4	19
3	42	20
3	62	20
3	84	18
3	19	21
3	22	21
3	30	14
3	35	17
3	62	20
3	64	14
3	64	14
3	93	17
3	54	21
3	61	22
3	73	16
3	35	17
3	73	16
3	35	17
3	64	16
3	87	24
3	44	25
3	51	25
3	72	25
3	86	25
3	99	25
3	13	19
3	28	20
3	70	26
3	95	26
3	10	27
3	36	23
3	78	26
3	34	28
3	41	28
3	59	28
3	66	26
3	84	25
3	21	26
3	26	29
3	41	29
3	41	28
3	59	28
3	22	21
3	32	29
3	41	28
3	41	28
3	41	28
3	44	25
3	44	25
3	44	25
3	78	26
3	93	26
3	93	26
3	1	28
3	48	30
3	44	25
3	65	31
3	71	31
3	17	29
3	32	32
3	76	30
3	93	27
3	16	33
3	17	29
3	26	29
3	32	29
3	48	30
3	89	33
3	93	33
3	26	29
3	32	29
3	41	28
3	70	34
3	71	31
3	32	32
3	41	28
3	64	33
3	82	33
3	89	33
3	14	36
3	16	33
3	17	29
3	32	32
3	40	33
3	64	33
3	76	33
3	76	33
3	89	33
3	89	33
3	1	32
3	14	36
3	35	37
3	32	32
3	40	33
3	61	37
3	70	34
3	76	33
3	82	33
3	89	33
3	89	33
3	100	37
3	2	38
3	8	36
3	26	35
3	33	38
3	70	38
3	88	36
3	89	33
3	40	39
3	53	39
3	54	39
3	54	35
3	61	37
3	95	39
3	26	38
3	26	35
3	35	37
3	54	37
3	76	40
3	12	41
3	35	37
3	46	37
3	59	40
3	77	39
3	91	41
3	1	42
3	12	41
3	33	38
3	45	42
3	59	40
3	75	42
3	88	42
3	90	42
3	1	42
3	1	42
3	14	40
3	14	40
3	35	43
3	77	39
3	85	43
3	93	39
3	12	41
3	20	44
3	75	42
3	84	44
3	32	44
3	75	42
3	96	45
3	9	45
3	33	38
3	39	42
3	45	42
3	77	39
3	96	45
3	17	45
3	54	46
3	12	41
3	9	45
3	37	48
3	84	48
3	28	48
3	60	50
3	74	47
3	83	49
3	85	43
3	85	43
3	92	50
3	95	50
3	96	46
3	7	50
3	12	50
3	37	48
3	63	48
3	7	50
3	24	49
3	31	48
3	61	49
3	63	48
3	83	49
3	92	50
3	2	49
3	49	53
3	52	53
3	57	53
3	73	50
3	1	54
3	36	53
3	49	53
3	52	53
3	90	53
3	90	53
3	29	55
3	46	55
3	62	55
3	7	54
3	32	53
3	32	53
3	61	49
3	61	49
3	76	56
3	81	56
3	24	57
3	49	53
3	52	53
3	88	57
3	1	54
3	16	58
3	46	58
3	49	53
3	19	56
3	46	55
3	52	59
3	30	60
3	38	60
3	36	53
3	52	59
3	58	60
3	62	60
3	62	55
3	57	60
3	57	60
3	62	60
3	69	56
3	88	57
3	13	62
3	19	56
3	38	62
3	40	60
3	45	62
3	62	55
3	69	56
3	83	62
3	95	58
3	19	63
3	16	58
3	24	57
3	38	60
3	40	60
3	46	58
3	52	63
3	57	60
3	16	58
3	19	56
3	46	58
3	78	64
3	2	65
3	27	65
3	24	57
3	33	65
3	45	65
3	57	60
3	90	65
3	99	65
3	13	65
3	13	65
3	99	65
3	27	65
3	32	67
3	30	60
3	45	63
3	50	67
3	52	67
3	77	67
3	99	65
3	30	60
3	50	67
3	63	68
3	77	65
3	89	65
3	33	65
3	45	65
3	59	69
3	69	69
3	77	65
3	85	69
3	11	69
3	19	69
3	52	66
3	89	69
3	94	70
3	2	65
3	60	68
3	94	70
3	16	72
3	16	70
3	28	70
3	33	72
3	57	71
3	69	69
3	75	72
3	78	72
3	94	70
3	11	69
3	11	69
3	28	70
3	68	70
3	85	69
3	2	72
3	8	70
3	16	70
3	25	74
3	50	74
3	64	74
3	33	74
3	33	72
3	39	74
3	51	72
3	64	74
3	2	72
3	14	76
3	33	72
3	62	76
3	6	77
3	10	76
3	25	74
3	57	73
3	85	74
3	89	69
3	14	76
3	15	74
3	21	76
3	31	76
3	44	74
3	56	78
3	68	74
3	74	78
3	87	74
3	1	77
3	10	76
3	62	76
3	64	74
3	85	74
3	1	77
3	15	74
3	95	80
3	20	77
3	33	74
3	62	76
3	62	76
3	75	78
3	14	82
3	49	82
3	75	78
3	58	83
3	82	83
3	82	82
3	2	82
3	14	82
3	26	84
3	27	84
3	6	77
3	26	85
3	26	84
3	43	81
3	49	80
3	56	85
3	58	83
3	64	82
3	12	86
3	42	83
3	95	80
3	21	82
3	37	86
3	56	87
3	64	82
3	78	85
3	92	87
3	93	87
3	45	88
3	71	86
3	76	88
3	12	86
3	22	88
3	22	88
3	21	82
3	37	86
3	45	88
3	56	85
3	76	89
3	82	83
3	82	83
3	92	89
3	1	87
3	22	88
3	27	90
3	37	90
3	37	86
3	76	88
3	26	85
3	34	91
3	43	91
3	44	91
3	45	88
3	22	88
3	43	91
3	55	92
3	84	90
3	91	89
3	91	89
3	2	93
3	4	93
3	22	91
3	26	85
3	66	93
3	84	90
3	91	89
3	2	93
3	17	90
3	27	90
3	50	94
3	51	94
3	76	90
3	56	92
3	76	91
3	2	93
3	22	94
3	40	95
3	86	96
3	90	96
3	2	93
3	10	97
3	32	94
3	97	97
3	17	90
3	44	91
3	50	94
3	72	97
3	72	97
3	2	93
3	9	99
3	37	99
3	44	91
3	81	99
3	97	97
3	30	97
3	54	100
3	56	100
3	59	98
3	83	97

## Sheet: Sheet9
1	2	1
1	15	1
1	32	1
1	45	1
1	56	1
1	64	1
1	78	1
1	81	1
1	2	1
1	7	2
1	13	2
1	24	2
1	26	2
1	32	1
1	49	1
1	7	2
1	13	2
1	26	2
1	32	1
1	32	1
1	45	1
1	45	1
1	24	4
1	39	3
1	63	3
1	74	1
1	1	5
1	24	2
1	26	2
1	32	1
1	38	5
1	45	1
1	74	1
1	78	1
1	84	1
1	88	1
1	7	6
1	20	6
1	24	2
1	24	2
1	26	2
1	61	6
1	63	3
1	63	3
1	84	1
1	88	1
1	97	6
1	12	5
1	33	7
1	39	3
1	54	2
1	74	4
1	97	6
1	1	5
1	12	5
1	49	6
1	49	6
1	61	6
1	63	3
1	70	5
1	97	8
1	1	9
1	38	5
1	49	6
1	83	9
1	84	1
1	1	9
1	1	9
1	1	9
1	7	6
1	7	6
1	44	9
1	96	10
1	97	6
1	44	9
1	64	11
1	49	6
1	49	6
1	60	12
1	63	12
1	64	11
1	70	5
1	14	13
1	43	13
1	53	13
1	96	10
1	24	12
1	43	13
1	94	13
1	94	13
1	3	15
1	8	15
1	11	15
1	27	11
1	33	15
1	38	13
1	60	12
1	88	14
1	93	15
1	8	15
1	27	11
1	34	13
1	60	12
1	79	13
1	51	14
1	75	15
1	88	14
1	13	14
1	60	18
1	1	19
1	3	15
1	75	15
1	1	20
1	1	19
1	6	20
1	11	20
1	36	20
1	46	20
1	75	15
1	6	20
1	36	20
1	36	20
1	43	21
1	51	14
1	75	21
1	78	21
1	36	20
1	49	18
1	72	22
1	75	15
1	46	20
1	91	23
1	95	21
1	24	24
1	62	24
1	75	21
1	91	23
1	1	21
1	15	25
1	49	18
1	75	21
1	86	25
1	49	18
1	58	25
1	58	25
1	86	25
1	91	23
1	48	27
1	79	27
1	91	23
1	96	27
1	6	25
1	21	29
1	31	27
1	13	25
1	58	25
1	58	25
1	86	30
1	8	31
1	13	25
1	21	29
1	31	31
1	74	27
1	94	31
1	7	32
1	21	29
1	30	32
1	31	32
1	39	28
1	63	31
1	73	32
1	94	31
1	2	30
1	63	31
1	92	32
1	2	34
1	39	28
1	1	35
1	13	35
1	16	33
1	26	33
1	53	31
1	82	35
1	84	31
1	99	35
1	30	32
1	44	36
1	39	28
1	82	35
1	82	35
1	9	37
1	16	33
1	26	33
1	62	37
1	84	31
1	16	33
1	34	37
1	38	33
1	79	38
1	82	38
1	26	33
1	38	33
1	49	39
1	68	39
1	79	38
1	34	37
1	38	33
1	44	36
1	61	37
1	79	38
1	79	38
1	6	40
1	26	33
1	26	33
1	38	33
1	62	37
1	70	37
1	19	41
1	28	42
1	34	37
1	67	42
1	17	43
1	28	42
1	34	39
1	54	41
1	67	42
1	68	39
1	70	37
1	70	37
1	70	37
1	13	44
1	14	44
1	17	43
1	54	41
1	72	44
1	93	44
1	97	41
1	13	44
1	17	43
1	19	41
1	19	41
1	34	39
1	51	45
1	93	45
1	1	46
1	2	46
1	8	46
1	13	44
1	51	45
1	51	47
1	51	45
1	51	45
1	72	44
1	77	47
1	79	44
1	89	47
1	93	44
1	97	41
1	8	46
1	33	48
1	43	47
1	51	45
1	54	41
1	54	41
1	93	44
1	1	46
1	77	49
1	99	49
1	1	50
1	20	50
1	34	44
1	43	47
1	59	50
1	89	47
1	6	51
1	9	46
1	20	50
1	20	50
1	25	50
1	40	50
1	43	47
1	56	51
1	89	47
1	40	50
1	92	47
1	8	51
1	9	46
1	31	53
1	34	44
1	54	53
1	71	53
1	6	51
1	8	51
1	20	50
1	20	50
1	71	53
1	84	54
1	52	54
1	78	54
1	78	54
1	92	47
1	1	55
1	5	55
1	20	54
1	26	56
1	30	56
1	31	53
1	71	53
1	78	54
1	19	57
1	31	53
1	84	54
1	1	55
1	26	56
1	38	55
1	64	54
1	5	55
1	5	55
1	96	59
1	5	55
1	89	60
1	35	61
1	36	61
1	48	59
1	48	58
1	57	61
1	89	57
1	5	55
1	19	59
1	28	64
1	32	62
1	35	61
1	57	61
1	64	60
1	89	60
1	57	61
1	84	65
1	88	63
1	100	65
1	28	64
1	42	66
1	44	66
1	52	66
1	72	58
1	19	59
1	58	67
1	5	67
1	20	64
1	19	59
1	42	68
1	49	66
1	58	67
1	72	58
1	89	68
1	41	69
1	52	66
1	74	69
1	27	69
1	41	69
1	64	66
1	74	70
1	86	70
1	87	70
1	95	70
1	2	70
1	5	67
1	11	68
1	49	66
1	49	66
1	58	67
1	49	69
1	82	72
1	94	72
1	95	72
1	37	73
1	41	69
1	62	72
1	5	67
1	11	68
1	27	69
1	37	69
1	2	70
1	14	75
1	37	73
1	62	72
1	73	75
1	24	76
1	35	76
1	88	76
1	92	76
1	14	77
1	20	77
1	37	69
1	57	75
1	4	78
1	5	77
1	12	78
1	32	78
1	73	75
1	14	75
1	88	76
1	4	78
1	5	77
1	32	78
1	56	75
1	64	78
1	73	80
1	78	79
1	97	80
1	2	80
1	5	77
1	19	81
1	29	80
1	32	78
1	38	81
1	64	81
1	76	80
1	5	77
1	12	78
1	19	81
1	38	81
1	52	82
1	73	82
1	97	80
1	97	80
1	18	83
1	19	81
1	76	80
1	11	83
1	29	80
1	47	84
1	50	83
1	64	81
1	29	80
1	46	85
1	60	85
1	63	85
1	64	81
1	91	85
1	71	86
1	73	82
1	31	87
1	46	85
1	59	87
1	93	83
1	11	83
1	50	83
1	63	85
1	80	88
1	82	86
1	89	85
1	55	89
1	56	89
1	71	89
1	93	83
1	2	90
1	2	88
1	31	87
1	37	87
1	51	90
1	85	85
1	1	90
1	31	87
1	37	87
1	59	87
1	80	88
1	89	85
1	2	90
1	10	91
1	37	87
1	51	90
1	71	89
1	80	88
1	80	88
1	8	93
1	10	91
1	19	90
1	48	92
1	71	89
1	77	93
1	34	94
1	51	90
1	56	94
1	47	95
1	48	92
1	56	94
1	4	96
1	8	93
1	18	96
1	47	95
1	56	94
1	71	95
1	85	93
1	8	93
1	47	95
1	63	97
1	71	95
1	85	93
1	28	98
1	92	98
1	7	95
1	7	95
1	42	96
1	47	99
1	47	95
1	54	99
1	15	100
1	28	100
1	47	99
2	17	1
2	49	1
2	74	1
2	77	1
2	84	1
2	95	1
2	100	1
2	2	2
2	13	2
2	28	2
2	78	1
2	88	1
2	7	2
2	13	2
2	39	3
2	63	3
2	64	1
2	84	1
2	12	5
2	39	3
2	70	5
2	78	1
2	88	1
2	23	6
2	54	2
2	59	6
2	63	3
2	74	1
2	88	1
2	12	5
2	31	7
2	38	7
2	61	6
2	85	6
2	12	8
2	31	7
2	38	8
2	39	3
2	20	6
2	28	9
2	44	9
2	61	6
2	69	5
2	84	1
2	7	6
2	38	7
2	44	10
2	44	9
2	1	9
2	27	11
2	38	7
2	54	2
2	54	2
2	69	11
2	24	12
2	26	12
2	70	5
2	83	9
2	60	12
2	24	12
2	51	14
2	52	14
2	79	13
2	14	13
2	14	13
2	34	13
2	64	11
2	69	11
2	11	15
2	24	12
2	24	12
2	26	12
2	68	16
2	73	16
2	74	16
2	79	13
2	3	15
2	20	18
2	49	18
2	51	14
2	62	18
2	94	13
2	8	15
2	11	15
2	29	19
2	74	16
2	88	14
2	47	20
2	48	20
2	79	13
2	25	21
2	29	21
2	36	20
2	62	18
2	79	21
2	68	22
2	75	21
2	29	19
2	47	20
2	87	23
2	11	20
2	11	20
2	68	22
2	72	22
2	75	21
2	48	25
2	58	25
2	59	25
2	68	25
2	95	21
2	23	26
2	43	26
2	49	18
2	68	22
2	68	22
2	62	24
2	63	23
2	68	27
2	1	21
2	6	25
2	11	28
2	13	25
2	15	25
2	43	26
2	31	27
2	39	28
2	86	29
2	39	28
2	53	30
2	54	29
2	31	27
2	39	28
2	53	31
2	53	30
2	54	29
2	63	31
2	64	31
2	84	31
2	30	32
2	31	27
2	39	28
2	39	28
2	50	32
2	63	31
2	74	27
2	92	32
2	8	31
2	16	33
2	53	30
2	63	31
2	86	30
2	91	34
2	8	31
2	13	35
2	22	35
2	26	33
2	50	35
2	53	31
2	73	32
2	92	32
2	7	32
2	13	35
2	16	33
2	16	33
2	36	36
2	39	28
2	70	36
2	82	35
2	99	36
2	1	35
2	38	33
2	61	37
2	92	32
2	99	35
2	1	35
2	38	33
2	50	35
2	7	39
2	34	39
2	44	36
2	82	35
2	34	40
2	49	40
2	88	40
2	23	41
2	87	41
2	49	39
2	62	42
2	61	37
2	61	37
2	79	38
2	19	41
2	23	41
2	28	42
2	70	37
2	6	40
2	34	40
2	70	37
2	87	41
2	6	40
2	13	44
2	34	39
2	54	41
2	72	44
2	93	44
2	17	43
2	28	42
2	72	44
2	79	44
2	93	44
2	9	46
2	50	47
2	51	47
2	64	47
2	79	44
2	93	44
2	97	41
2	34	44
2	89	48
2	1	49
2	43	47
2	43	47
2	64	47
2	74	49
2	93	45
2	25	50
2	40	50
2	43	47
2	54	41
2	77	47
2	89	47
2	25	50
2	34	44
2	64	47
2	89	47
2	92	47
2	98	51
2	99	51
2	54	41
2	77	49
2	88	52
2	89	48
2	89	48
2	95	52
2	32	53
2	34	44
2	54	53
2	72	53
2	20	54
2	40	50
2	78	54
2	38	55
2	84	54
2	5	55
2	8	51
2	20	54
2	71	53
2	72	53
2	1	55
2	54	53
2	71	53
2	72	53
2	59	58
2	20	54
2	48	59
2	48	58
2	48	58
2	72	58
2	89	57
2	97	59
2	30	56
2	40	60
2	57	60
2	96	59
2	4	61
2	38	61
2	48	59
2	48	58
2	2	62
2	19	59
2	32	62
2	72	58
2	72	58
2	89	60
2	29	63
2	57	61
2	69	63
2	84	63
2	89	60
2	9	61
2	17	64
2	35	61
2	69	64
2	84	64
2	89	60
2	17	64
2	48	59
2	69	63
2	17	64
2	88	63
2	61	67
2	76	64
2	88	63
2	17	64
2	32	62
2	76	64
2	88	63
2	5	67
2	11	68
2	17	67
2	22	69
2	27	69
2	49	69
2	57	69
2	3	70
2	11	68
2	37	69
2	42	66
2	58	67
2	97	70
2	17	67
2	27	69
2	41	69
2	49	71
2	49	69
2	89	68
2	2	70
2	2	70
2	27	74
2	49	69
2	86	70
2	95	70
2	5	67
2	25	74
2	47	74
2	57	75
2	62	72
2	62	72
2	69	75
2	73	75
2	24	76
2	37	69
2	56	75
2	80	76
2	5	77
2	14	75
2	21	77
2	47	74
2	57	75
2	69	75
2	92	76
2	80	76
2	20	77
2	45	79
2	57	75
2	57	75
2	69	75
2	78	79
2	80	76
2	2	80
2	4	78
2	4	78
2	29	80
2	35	76
2	42	80
2	45	79
2	64	78
2	5	77
2	5	77
2	64	78
2	96	81
2	32	78
2	45	79
2	56	75
2	19	83
2	29	80
2	38	81
2	50	83
2	76	80
2	93	83
2	97	80
2	17	84
2	19	81
2	29	80
2	49	84
2	52	82
2	97	80
2	19	81
2	47	84
2	73	85
2	73	82
2	76	80
2	96	81
2	10	86
2	44	86
2	73	82
2	82	86
2	18	83
2	19	83
2	37	87
2	60	85
2	71	86
2	93	83
2	2	88
2	10	86
2	11	83
2	85	85
2	27	88
2	37	87
2	93	83
2	1	90
2	2	88
2	19	90
2	31	87
2	55	89
2	59	87
2	67	90
2	71	86
2	10	91
2	11	91
2	12	91
2	19	90
2	37	87
2	37	87
2	37	92
2	48	92
2	71	89
2	77	92
2	78	88
2	89	92
2	96	92
2	98	92
2	10	93
2	27	93
2	48	92
2	55	89
2	63	93
2	77	93
2	85	93
2	89	92
2	96	92
2	10	91
2	85	94
2	7	95
2	10	91
2	34	95
2	71	95
2	77	93
2	19	90
2	37	92
2	42	96
2	63	96
2	63	93
2	1	97
2	4	96
2	10	93
2	18	96
2	18	96
2	42	96
2	71	95
2	85	93
2	85	93
2	1	97
2	4	96
2	71	95
2	92	98
2	95	96
2	1	97
2	28	98
2	71	95
2	71	95
2	82	99
2	85	93
2	4	96
2	32	98
2	81	100
2	85	93
2	92	98
2	95	96
3	40	1
3	49	1
3	57	1
3	76	1
3	88	1
3	91	1
3	98	1
3	17	1
3	28	2
3	54	2
3	88	1
3	91	1
3	17	1
3	26	2
3	64	1
3	81	1
3	88	1
3	2	1
3	17	1
3	26	2
3	39	3
3	39	3
3	45	1
3	74	4
3	17	1
3	69	5
3	1	5
3	7	2
3	12	6
3	49	6
3	50	6
3	85	6
3	88	1
3	100	6
3	29	7
3	38	5
3	1	5
3	97	6
3	31	7
3	70	5
3	74	1
3	12	5
3	38	10
3	38	7
3	74	4
3	12	5
3	12	5
3	27	11
3	54	2
3	96	11
3	27	12
3	49	6
3	49	6
3	70	5
3	70	5
3	13	13
3	15	13
3	28	9
3	34	13
3	38	13
3	64	11
3	69	5
3	79	13
3	94	13
3	13	14
3	23	14
3	44	9
3	60	12
3	69	11
3	88	14
3	12	15
3	22	15
3	24	12
3	43	15
3	43	13
3	43	13
3	51	14
3	60	12
3	60	12
3	75	15
3	77	15
3	94	13
3	94	13
3	94	13
3	27	11
3	73	16
3	18	18
3	33	15
3	33	15
3	79	13
3	88	14
3	94	13
3	3	15
3	27	11
3	33	15
3	58	19
3	93	15
3	73	16
3	1	21
3	1	19
3	11	20
3	34	21
3	62	18
3	62	18
3	95	21
3	25	21
3	43	21
3	75	15
3	1	19
3	25	23
3	34	21
3	47	20
3	58	19
3	58	19
3	63	23
3	43	21
3	46	20
3	68	22
3	75	21
3	91	23
3	6	25
3	13	25
3	48	25
3	49	18
3	62	25
3	68	22
3	72	22
3	87	23
3	86	25
3	91	23
3	15	25
3	15	25
3	24	24
3	31	27
3	62	24
3	68	25
3	74	27
3	91	23
3	15	25
3	24	24
3	39	28
3	68	25
3	79	27
3	96	28
3	15	25
3	23	26
3	39	29
3	54	29
3	86	29
3	2	30
3	9	30
3	21	29
3	39	30
3	68	27
3	96	27
3	31	27
3	48	27
3	48	27
3	53	31
3	53	30
3	86	30
3	29	32
3	52	32
3	75	32
3	74	27
3	26	33
3	38	33
3	39	28
3	50	32
3	86	30
3	94	31
3	94	31
3	99	33
3	8	31
3	24	34
3	54	29
3	99	33
3	2	35
3	16	35
3	24	35
3	29	32
3	31	31
3	63	31
3	73	32
3	74	27
3	91	35
3	94	31
3	70	36
3	1	37
3	2	34
3	12	37
3	26	33
3	26	33
3	34	37
3	70	37
3	70	36
3	92	32
3	36	36
3	91	34
3	44	36
3	53	31
3	77	39
3	82	35
3	84	31
3	6	40
3	9	37
3	34	37
3	62	37
3	82	38
3	82	38
3	19	41
3	20	41
3	23	41
3	26	33
3	34	39
3	34	37
3	34	37
3	38	33
3	54	41
3	56	41
3	57	41
3	62	37
3	68	39
3	97	41
3	6	40
3	19	41
3	19	41
3	23	41
3	43	42
3	68	39
3	97	42
3	97	41
3	23	41
3	28	42
3	49	39
3	68	39
3	96	43
3	2	44
3	34	44
3	34	40
3	54	41
3	54	41
3	79	44
3	93	44
3	97	41
3	17	43
3	19	41
3	19	41
3	92	45
3	9	46
3	72	44
3	92	45
3	34	44
3	43	47
3	92	47
3	28	48
3	64	47
3	72	44
3	79	44
3	33	48
3	42	49
3	43	49
3	51	45
3	54	41
3	73	49
3	99	49
3	33	48
3	56	50
3	54	41
3	8	51
3	51	47
3	6	51
3	6	51
3	14	52
3	25	50
3	34	44
3	40	50
3	84	52
3	6	51
3	43	47
3	56	51
3	6	51
3	8	51
3	9	46
3	31	53
3	40	50
3	52	54
3	54	53
3	64	54
3	83	54
3	84	52
3	92	47
3	1	55
3	5	55
3	64	55
3	64	54
3	84	54
3	84	54
3	5	55
3	20	54
3	29	56
3	52	54
3	54	53
3	71	53
3	84	54
3	88	52
3	5	55
3	38	55
3	54	53
3	72	53
3	89	57
3	48	58
3	72	58
3	78	54
3	78	54
3	1	55
3	19	59
3	26	56
3	38	55
3	52	54
3	72	58
3	77	59
3	41	60
3	48	59
3	48	58
3	64	60
3	89	57
3	9	61
3	48	61
3	48	59
3	48	58
3	59	58
3	64	61
3	72	58
3	2	62
3	4	61
3	30	62
3	38	55
3	64	54
3	72	58
3	4	61
3	4	61
3	41	60
3	57	61
3	88	63
3	89	57
3	20	64
3	48	59
3	64	64
3	76	64
3	9	61
3	19	59
3	35	61
3	44	65
3	72	58
3	82	65
3	84	63
3	2	62
3	32	62
3	32	62
3	44	66
3	49	66
3	64	66
3	64	60
3	74	66
3	5	67
3	17	67
3	20	64
3	19	59
3	49	67
3	52	66
3	64	67
3	72	58
3	99	67
3	11	68
3	28	64
3	42	66
3	44	66
3	61	67
3	64	60
3	72	58
3	82	65
3	5	67
3	20	64
3	37	69
3	61	67
3	74	66
3	72	58
3	88	63
3	98	69
3	2	70
3	72	70
3	74	69
3	89	68
3	11	68
3	37	69
3	62	72
3	86	70
3	95	70
3	11	68
3	22	69
3	27	69
3	80	73
3	82	72
3	95	70
3	25	74
3	26	74
3	47	74
3	37	69
3	56	75
3	14	75
3	37	73
3	47	74
3	62	72
3	80	76
3	27	74
3	62	72
3	88	77
3	88	76
3	5	77
3	35	76
3	64	78
3	100	79
3	4	78
3	4	78
3	14	77
3	24	76
3	32	80
3	32	78
3	56	80
3	57	75
3	76	80
3	29	80
3	19	81
3	32	78
3	96	82
3	11	83
3	52	83
3	64	81
3	64	78
3	96	81
3	18	83
3	19	81
3	38	81
3	42	80
3	42	80
3	48	84
3	64	78
3	76	80
3	29	80
3	47	84
3	71	85
3	72	85
3	76	80
3	85	85
3	89	85
3	59	86
3	60	85
3	81	86
3	91	85
3	93	83
3	59	87
3	98	87
3	17	84
3	27	88
3	60	85
3	63	85
3	78	88
3	81	86
3	85	85
3	93	83
3	31	87
3	60	85
3	85	85
3	10	86
3	31	87
3	37	87
3	50	90
3	68	90
3	48	91
3	49	91
3	51	90
3	55	89
3	65	91
3	71	89
3	93	83
3	27	88
3	50	90
3	55	89
3	67	90
3	71	89
3	1	90
3	10	93
3	19	90
3	26	93
3	67	90
3	71	89
3	85	85
3	37	87
3	37	87
3	67	90
3	77	93
3	32	95
3	47	95
3	18	96
3	34	94
3	71	95
3	95	96
3	83	97
3	95	97
3	4	96
3	4	96
3	32	98
3	62	98
3	68	98
3	71	95
3	71	95
3	4	96
3	32	95
3	56	99
3	63	97
3	71	95
3	92	98
3	85	93

[truncated: 91 more sheets: Sheet10, Sheet11, Sheet12, Sheet13, Sheet14, Sheet15, Sheet16, Sheet17, Sheet18, Sheet19, Sheet20, Sheet21, Sheet22, Sheet23, Sheet24, Sheet25, Sheet26, Sheet27, Sheet28, Sheet29 …]
